# Supplementary material for: Visible-light-driven graphitic carbon nitride-catalyzed ATRA of alkynes: highly regio- and stereoselective synthesis of (E)-β-functionalized vinylsulfones
Source: Royal Society of Chemistry journal article supplement (doi:10.1039/d3gc02897f), 2023-10-17

## Supporting Information

Visible-Light-Driven Graphitic Carbon Nitride-Catalyzed ATRA of Alkynes: Highly  
Regio- and Stereoselective Synthesis of (*E*)- $\beta$ -Functionalized Vinylsulfones

Shu-Li Xie,<sup>+</sup> Jian-Zhong Yan,<sup>+</sup> Meng-Jun Xie, Xuan Li, Fan Zhou, Mei-Qiong Zheng,  
Xue-Lin Wang, Junhao Feng, Yao Zhang, Ya-Nan Duan, Yong-Dong Niu,<sup>\*</sup> Dong Li,<sup>\*</sup>  
Hai-Dong Xia<sup>\*</sup>

### Contents

|                                                                            |     |
|----------------------------------------------------------------------------|-----|
| 1. General information .....                                               | S1  |
| 2. Screening of reaction conditions.....                                   | S2  |
| 3. Synthesis and characterization of g-C <sub>3</sub> N <sub>4</sub> ..... | S6  |
| 4. Synthesis of <i>X</i> -phenyl 4-methylbenzenesulfonothioate.....        | S7  |
| 5. Synthesis of complex alkynes .....                                      | S10 |
| 6. Synthesis of ( <i>E</i> )- $\beta$ -functionalized vinylsulfones.....   | S15 |
| 7. Synthetic application.....                                              | S48 |
| 8. Mechanistic Studies .....                                               | S51 |
| 9. References.....                                                         | S62 |
| 10. NMR Spectra .....                                                      | S64 |

## 1. General information

Reagents were used as received from commercial suppliers without further purification, unless otherwise stated. NMR spectra were recorded for  $^1\text{H}$  NMR (400 MHz and 600 MHz),  $^{13}\text{C}$  NMR (100 MHz and 150 MHz) and  $^{19}\text{F}$  NMR (376 and 565 MHz) using TMS as an internal standard and Bruker AV 400 and 600 as an instrument. The following abbreviations were used to describe peak patterns where appropriate: singlet (s), doublet (d), triplet (t), multiplet (m). High-resolution mass spectroscopy (HRMS) were obtained using Bruker Apex IV RTMS. The surface morphology and fine structures were observed by transmission electron microscope (TEM, Titan G260-300). The X-ray photoelectron spectroscopy (XPS) signals were obtained by a thermo K-Alpha spectrometer with an Al Ka X-ray source (1486.6 eV). The binding energy was calibrated using the C1s level at 284.6 eV as an internal standard. IR spectra were recorded with a FT-IR Bruker EQUINOX55 spectrometer in KBr pellets. The X-ray diffraction data was collected on a XtaLab PRO MM007HF-DW diffractometer. The surface morphology and structure were observed by field-emission scanning electron microscope (FE-SEM, Gemini SEM 300).

### Reaction set-up for the photocatalytic reactions with blue LED

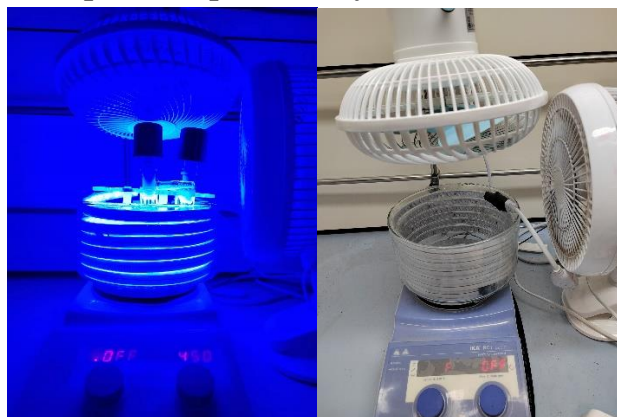

LED strips: 7 W/m \*5 m was purchased from [www.taobao.com](http://www.taobao.com).

## 2. Screening of reaction conditions

**Table S1 Screening of different solvents<sup>a</sup>**

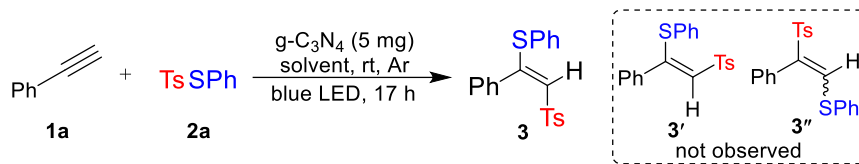

| Entry     | Solvent                         | Isolated yield (%) |
|-----------|---------------------------------|--------------------|
| 1         | toluene                         | NR                 |
| 2         | CF <sub>3</sub> Ph              | NR                 |
| 3         | DME                             | 45                 |
| 4         | THF                             | 67                 |
| 5         | 1,4-dioxane                     | 75                 |
| 6         | CH <sub>3</sub> CN              | trace              |
| 7         | CH <sub>2</sub> Cl <sub>2</sub> | 73                 |
| 8         | DCE                             | 47                 |
| 9         | EtOAc                           | NR                 |
| 10        | dimethyl carbonate              | 55                 |
| 11        | diethyl carbonate               | NR                 |
| 12        | DMF                             | 88                 |
| <b>13</b> | <b>DMSO</b>                     | <b>89</b>          |
| 14        | acetone                         | 86                 |

<sup>a</sup>Reaction conditions: **1a** (0.1 mmol), **2a** (0.2 mmol),  $g\text{-C}_3\text{N}_4$  (5 mg) in solvent (1 mL) at room temperature under blue LED (7 W) irradiation for 17 h under argon. NR = not reaction.

**Table S2 Screening of reactant amount<sup>a</sup>**

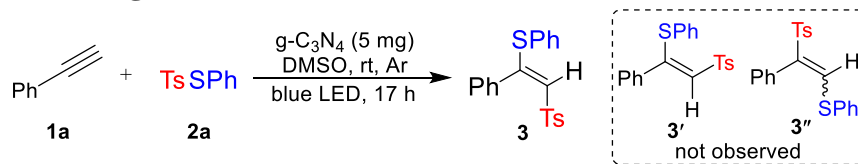

| Entry    | <b>1a</b> (equiv.) | <b>2a</b> (equiv.) | Isolated yield (%) |
|----------|--------------------|--------------------|--------------------|
| 1        | 1                  | 1                  | 51                 |
| 2        | 1                  | 1.2                | 51                 |
| 3        | 1                  | 1.5                | 73                 |
| <b>4</b> | <b>1</b>           | <b>2</b>           | <b>89</b>          |
| 5        | 1                  | 2.5                | 86                 |
| 6        | 1.5                | 1                  | 34                 |

<sup>a</sup>Reaction conditions: **1a** (0.1 mmol),  $g\text{-C}_3\text{N}_4$  (5 mg) in DMSO (1.0 mL) at rt under irradiation of blue LED (7 W) for 17 h under argon.



**Table S3 Screening of catalyst loading<sup>a</sup>**

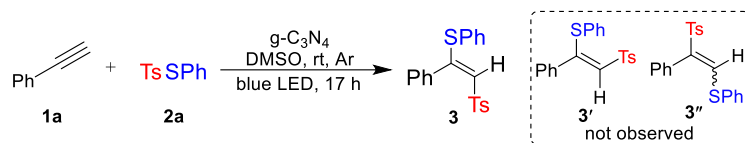

| Entry    | $g\text{-C}_3\text{N}_4$ | Isolated yield (%) |
|----------|--------------------------|--------------------|
| 1        | 2 mg                     | 32                 |
| 2        | 3 mg                     | 33                 |
| 3        | 4 mg                     | 79                 |
| <b>4</b> | <b>5 mg</b>              | <b>89</b>          |
| 5        | 6 mg                     | 85                 |

<sup>a</sup>Reaction conditions: **1a** (0.1 mmol), **2a** (2 equiv.) in DMSO (1.0 mL) at rt under irradiation of blue LED (7 W) for 17 h under argon.

**Table S4 Screening of different light source<sup>a</sup>**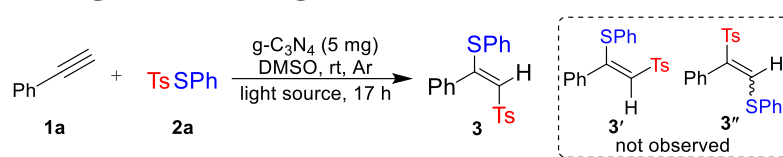

| Entry | Light source    | Isolated yield (%) |
|-------|-----------------|--------------------|
| 1     | Purple LED      | 32                 |
| 2     | <b>Blue LED</b> | <b>89</b>          |
| 3     | Green LED       | trace              |
| 4     | Red LED         | trace              |
| 5     | White LED       | 43                 |

<sup>a</sup>Reaction conditions: **1a** (0.1 mmol), **2a** (2 equiv.),  $\text{g-C}_3\text{N}_4$  (5 mg) in DMSO (1.0 mL) at rt under irradiation of different light source (7 W) for 17 h under argon.

### 3. Synthesis and characterization of g-C<sub>3</sub>N<sub>4</sub>

g-C<sub>3</sub>N<sub>4</sub> was synthesized according to a two-step thermal polymerization. First, a certain amount of urea was added to a crucible with a cover, then heated to 550 °C (2.5 °C min<sup>-1</sup>) for 4 h. Subsequently, the obtained yellow solid was further heated to 500 °C (5 °C min<sup>-1</sup>) for 2 h in an open crucible to obtain the target g-C<sub>3</sub>N<sub>4</sub>.

**Figure S1.** a) XRD patterns, b) FT-IR spectra, c) XPS survey, d) C1s spectra, e) N1s spectra, f) TEM image of g-C<sub>3</sub>N<sub>4</sub>, g) SEM image of g-C<sub>3</sub>N<sub>4</sub>

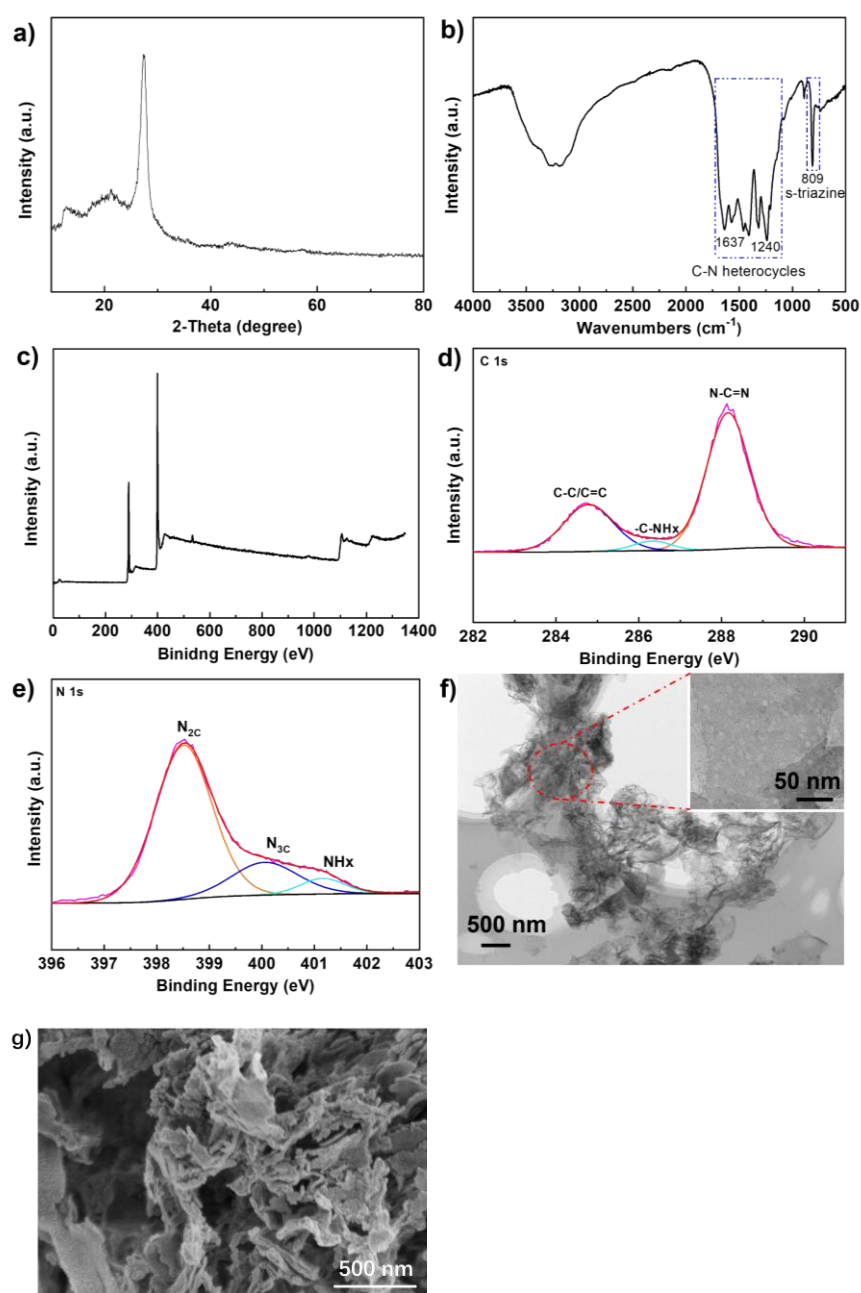

## 4. Synthesis of X-phenyl 4-methylbenzenesulfonothioate

### General procedure 1

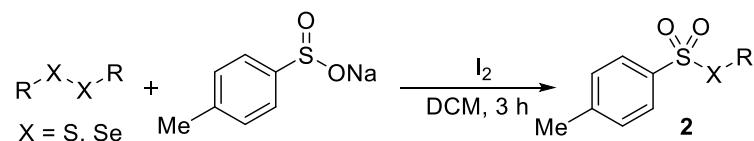

$\text{I}_2$  (2.0 equiv.) was added to the mixture of sodium benzenesulfinate (3.2 equiv.) and disulfide or diselenide (1.0 equiv.) in DCM. The mixture was stirred at room temperature until the disulfide or diselenide was consumed (determined by TLC, typically 3 h). The reaction was then quenched by saturated sodium thiosulfate. The aqueous layer was extracted three times with DCM. The combined organic layer was dried with anhydrous  $\text{Na}_2\text{SO}_4$ , concentrated and then subjected to flash column chromatography to obtain the desired product.<sup>[1]</sup>

### S-Phenyl 4-methylbenzenesulfonothioate (2a)

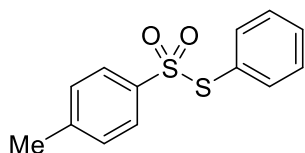

According to **General procedure 1** with phenyl disulfide (1.1 g, 5 mmol, 1.0 equiv.) and sodium *p*-toluenesulfinate (2.85 g, 16 mmol, 3.2 equiv.) for 3 h, the reaction mixture was purified by column chromatography on silica gel (petroleum ether/ethyl acetate = 10/1) to yield the product **2a** as a colorless solid (1.1 g, 81% yield).

$^1\text{H}$  NMR (400 MHz,  $\text{CDCl}_3$ )  $\delta$ : 7.44 – 7.35 (m, 3H), 7.32 – 7.27 (m, 4H), 7.15 (d,  $J$  = 8.1 Hz, 2H), 2.35 (s, 3H);  $^{13}\text{C}$  NMR (100 MHz,  $\text{CDCl}_3$ )  $\delta$ : 144.6, 139.7, 136.1, 131.1, 129.1, 127.5, 127.1, 21.3. The NMR spectra were in accord with that reported in literature.<sup>[2]</sup>

### S-(*p*-Tolyl) 4-methylbenzenesulfonothioate (2b)

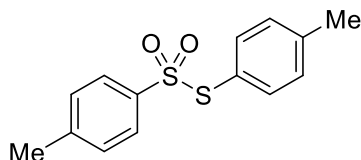

According to **General procedure 1** with *p*-tolyl disulfide (1.23 mg, 5 mmol, 1.0 equiv.) and sodium *p*-toluenesulfinate (2.85 g, 16 mmol, 3.2 equiv.) for 3 h, the reaction mixture was purified by column chromatography on silica gel (petroleum ether/ethyl acetate = 10/1) to yield the product **2b** as a colorless solid (1.04 g, 75%

yield).

$^1\text{H}$  NMR (400 MHz,  $\text{CDCl}_3$ )  $\delta$ : 7.43 (d,  $J = 8.3$  Hz, 2H), 7.21 (t,  $J = 7.8$  Hz, 4H), 7.12 (d,  $J = 8.0$  Hz, 2H), 2.40 (s, 3H), 2.36 (s, 3H);  $^{13}\text{C}$  NMR (100 MHz,  $\text{CDCl}_3$ )  $\delta$ : 144.5, 142.0, 140.3, 136.3, 130.1, 129.3, 127.4, 124.4, 21.5, 21.4. The NMR spectra were in accord with that reported in literature.<sup>[3]</sup>

#### ***S*--(4-Fluorophenyl) 4-fluorobenzenesulfonylthioate (2c)**

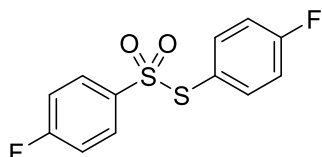

1,2-Bis-(4-fluorophenyl) disulfide (254 mg, 1.0 mmol, 1.0 equiv.) was poured in a round bottom flask and dissolved in acetonitrile (40 mL) required to prepare 0.1 M solution. To this solution, a stoichiometric amount of 37% (w/w) hydrochloric acid (98.6 mg, 2.0 mmol, 1.0 equiv.) and hydrogen peroxide 30% (510.0 mg, 3.0 mmol, 3 equiv.) were added. The mixture was stirred at rt for 8 h. Upon completion (monitored by TLC), the reaction was quenched with  $\text{NaHSO}_3$ , and extracted with ethyl acetate (3 x 20 mL). The combined organic layers were dried with over  $\text{Na}_2\text{SO}_4$  and concentrated in vacuo. The residue was purified by flash column chromatography on silica gel (petroleum ether/ethyl acetate = 10/1) to afford the pure product **2c** as a colorless oil (246.3 mg, 86% yield).

$^1\text{H}$  NMR (600 MHz,  $\text{CDCl}_3$ )  $\delta$  7.61 – 7.56 (m, 2H), 7.38 – 7.34 (m, 2H), 7.14 – 7.09 (m, 2H), 7.08 – 7.03 (m, 2H);  $^{13}\text{C}$  NMR (150 MHz,  $\text{CDCl}_3$ )  $\delta$ : 166.1 (d,  $J = 110.1$  Hz), 164.4 (d,  $J = 107.3$  Hz), 138.8 (d,  $J = 9$  Hz), 130.4 (d,  $J = 9.6$  Hz), 123.22 (d,  $J = 1.1$  Hz), 116.9 (d,  $J = 22.1$  Hz), 116.2 (d,  $J = 22.7$  Hz);  $^{19}\text{F}$  NMR (565 MHz,  $\text{CDCl}_3$ )  $\delta$ : -102.44, -106.78. The NMR spectra were in accord with that reported in literature.<sup>[4]</sup>

#### ***Se*-Phenyl 4-methylbenzenesulfonoselenoate (2f)**

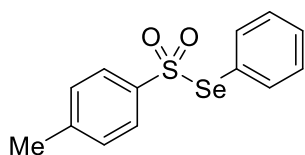

According to **General procedure 1** with diphenyl diselenide (1.56 g, 5 mmol, 1.0 equiv.) and sodium *p*-toluenesulfinate (2.85 g, 16 mmol, 3.2 equiv.) for 3 h, the reaction mixture was purified by column chromatography on silica gel (petroleum ether/ethyl acetate = 10/1) to yield the product **2f** as a yellow solid (1.2 g, 78% yield).

$^1\text{H}$  NMR (600 MHz,  $\text{CDCl}_3$ )  $\delta$ : 7.51 (dd,  $J = 8.0, 1.2$  Hz, 2H), 7.47 (td,  $J = 7.4, 1.2$  Hz, 1H), 7.39 (d,  $J = 8.3$  Hz, 2H), 7.33 (dd,  $J = 10.8, 4.5$  Hz, 2H), 7.18 (d,  $J = 8.1$  Hz, 2H), 2.41 (s, 3H);  $^{13}\text{C}$  NMR (150 MHz,  $\text{CDCl}_3$ )  $\delta$ : 144.5, 142.7, 137.2, 130.8, 129.5, 129.2, 128.0, 127.0, 21.6. The NMR spectra were in accord with that reported in literature.<sup>[3]</sup>

#### **S-(4-Methoxyphenyl) 4-methylbenzenesulfonothioate (2g)**

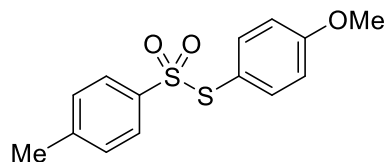

According to **General procedure 1** with bis(4-methoxyphenyl) disulphide (835.17 mg, 3 mmol, 1.0 equiv.) and sodium *p*-toluenesulfinate (1.71 g, 9.6 mmol, 3.2 equiv.) for 3 h, the reaction mixture was purified by column chromatography on silica gel (petroleum ether/ethyl acetate = 10/1) to yield the product **2g** as a colorless solid (629.1 mg, 71% yield).

$^1\text{H}$  NMR (400 MHz,  $\text{CDCl}_3$ )  $\delta$ : 7.38 (d,  $J = 8.2$  Hz, 2H), 7.17 (t,  $J = 8.9$  Hz, 4H), 6.79 (d,  $J = 8.7$  Hz, 2H), 3.75 (s, 3H), 2.35 (s, 3H);  $^{13}\text{C}$  NMR (100 MHz,  $\text{CDCl}_3$ )  $\delta$ : 162.0, 144.4, 139.9, 138.0, 129.2, 127.2, 118.3, 114.7, 55.2, 21.4. The NMR spectra were in accord with that reported in literature.<sup>[5]</sup>

#### **S-(4-Chlorophenyl) 4-methylbenzenesulfonothioate (2h)**

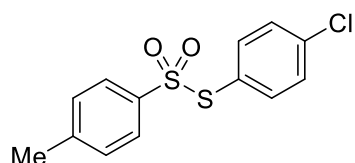

According to **General procedure 1** with bis(4-chlorophenyl) disulfide (1.44 g, 5 mmol, 1.0 equiv.) and sodium *p*-toluenesulfinate (343.3 mg, 1.92 mmol, 3.2 equiv.) for 3 h, the reaction mixture was purified by column chromatography on silica gel (petroleum ether/ethyl acetate = 10/1) to yield the product **2h** as a colorless solid (791.1 mg, 55% yield).

$^1\text{H}$  NMR (400 MHz,  $\text{CDCl}_3$ )  $\delta$ : 7.42 (d,  $J = 8.2$  Hz, 2H), 7.28 (d,  $J = 8.8$  Hz, 2H), 7.25 (d,  $J = 8.5$  Hz, 2H), 7.20 (d,  $J = 8.1$  Hz, 2H), 2.39 (s, 3H);  $^{13}\text{C}$  NMR (100 MHz,  $\text{CDCl}_3$ )  $\delta$ : 145.0, 140.0, 138.0, 137.6, 129.6, 129.4, 127.4, 126.4, 21.6. The NMR spectra were in accord with that reported in literature.<sup>[6]</sup>

### **S-(2-Chlorophenyl) 4-methylbenzenesulfonylthioate (2i)**

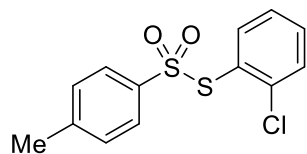

According to **General procedure 1** with 1,1'-disulfanediybis(2-chlorobenzene) (172 mg, 0.6 mmol, 1.0 equiv.) and sodium *p*-toluenesulfinate (343.3 mg, 1.92 mmol, 3.2 equiv.) for 3 h, the reaction mixture was purified by column chromatography on silica gel (petroleum ether/ethyl acetate = 10/1) to yield the product **2i** as a colorless solid (122.6 mg, 68% yield).

$^1\text{H}$  NMR (400 MHz,  $\text{CDCl}_3$ )  $\delta$ : 7.67 (d,  $J = 7.7$  Hz, 1H), 7.47 (d,  $J = 8.2$  Hz, 2H), 7.40 (d,  $J = 6.7$  Hz, 2H), 7.33 – 7.28 (m, 1H), 7.21 (d,  $J = 8.0$  Hz, 2H), 2.42 (s, 3H);  $^{13}\text{C}$  NMR (100 MHz,  $\text{CDCl}_3$ )  $\delta$ : 145.0, 140.5, 140.1, 139.3, 132.8, 130.2, 129.4, 127.5, 127.3, 126.9, 21.5. The NMR spectra were in accord with that reported in literature.<sup>[7]</sup>

### **S-Methyl 4-methylbenzenesulfonylthioate (2j)**

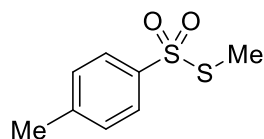

According to **General procedure 1** with dimethyl disulfide (471.0 mg, 5 mmol, 1.0 equiv.) and sodium *p*-toluenesulfinate (2.85 g, 16 mmol, 3.2 equiv.) for 3 h, the reaction mixture was purified by column chromatography on silica gel (petroleum ether/ethyl acetate = 10/1) to yield the product **2j** as a yellow solid (806.8 mg, 80% yield).

$^1\text{H}$  NMR (400 MHz,  $\text{CDCl}_3$ )  $\delta$  7.75 (d,  $J = 8.3$  Hz, 2H), 7.32 (d,  $J = 8.1$  Hz, 2H), 2.45 (s, 3H), 2.41 (s, 3H);  $^{13}\text{C}$  NMR (100 MHz,  $\text{CDCl}_3$ )  $\delta$ : 144.7, 140.7, 129.7, 126.9, 21.4, 17.8. The NMR spectra were in accord with that reported in literature.<sup>[8]</sup>

## **5. Synthesis of complex alkynes**

### **(8*R*,9*S*,13*S*,14*S*)-3-Ethynyl-13-methyl-6,7,8,9,11,12,13,14,15,16-decahydro-17*H*-cyclopenta[*a*]phenanthren-17-one (S57)**

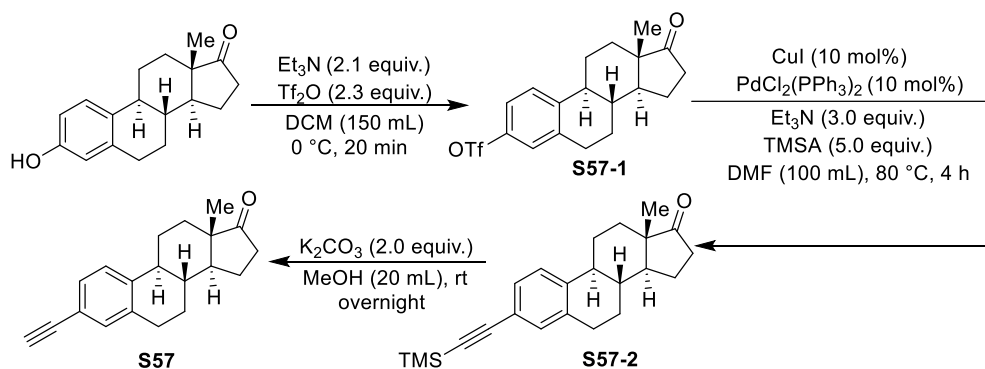

To a solution of estrone (2.0 g, 7.5 mmol, 1.0 equiv.) in dry CH<sub>2</sub>Cl<sub>2</sub> (125 mL) at 0 °C, triethylamine (2.2 mL, 15.8 mol, 5 equiv.) and trifluoromethanesulfonic anhydride (4.9 g, 17.3 mmol, 2.3 equiv.) were added. The reaction mixture was stirred at 0 °C for 20 min. After the completion of reaction, the reaction was quenched with water. The combined organic layers were washed with saturated brine (2 × 30 mL), extracted with ethyl acetate (3 × 20 mL) and dried with over anhydrous Na<sub>2</sub>SO<sub>4</sub> and concentrated in vacuo. The residue was purified by flash column chromatography on silica gel (petroleum ether/ethyl acetate = 20/1) to afford the pure product **S57-1** as a colorless solid (2.4 g, 81% yield).

Then, Pd(PPh<sub>3</sub>)<sub>2</sub>Cl<sub>2</sub> (259.0 mg, 0.37 mol, 10 mol%), CuI (70.3 mg, 0.4 mmol, 10 mol%), Et<sub>3</sub>N (2.2 mL, 11.1 mmol, 3 equiv.) and trimethylsilylacetylene (2.2 mL, 18.5 mmol, 5 equiv.) were added to the mixture of **S57-1** (1.5 g, 3.7 mmol, 1 equiv.) in DMF (74 mL) at 80 °C for 4 h. Upon completion (monitored by TLC), the reaction was quenched with water, and extracted with ethyl acetate (3 × 20 mL). The combined organic layers were dried with over Na<sub>2</sub>SO<sub>4</sub> and concentrated in vacuo. The residue was purified by flash column chromatography on silica gel (petroleum ether/ethyl acetate = 20/1) to afford the pure product **S57-2** as a colorless solid (1.1 g, 85% yield).

To the reaction mixture of **S57-2** (1.0 g, 3.0 mmol, 1 equiv.) in MeOH (30 mL), K<sub>2</sub>CO<sub>3</sub> (830.0 mg, 6.0 mmol, 2.0 equiv.) was added and the reaction was stirred at room temperature overnight. After the completion of reaction, the reaction was quenched with water and extracted with ethyl acetate (3 × 20 mL) for 2-3 times and dried with over anhydrous Na<sub>2</sub>SO<sub>4</sub>. The reaction mixture was purified by column chromatography on silica gel (petroleum ether/ethyl acetate = 10/1) to yield the product **S57** as a white solid (675.5 mg, 81% yield).



$^1\text{H}$  NMR (600 MHz,  $\text{CDCl}_3$ )  $\delta$  7.27 (d,  $J = 8.2$  Hz, 1H), 7.25 – 7.23 (m, 2H), 3.02 (s, 1H), 2.90 – 2.87 (m, 2H), 2.51 (dd,  $J = 19.1, 8.7$  Hz, 1H), 2.41 (ddd,  $J = 10.1, 7.0, 3.6$  Hz, 1H), 2.29 (td,  $J = 10.9, 3.8$  Hz, 1H), 2.18 – 2.11 (m, 1H), 2.08 – 2.06 (m, 3H), 1.98 – 1.95 (m, 1H), 1.67 – 1.51 (m, 5H), 0.91 (s, 3H);  $^{13}\text{C}$  NMR (150 MHz,  $\text{CDCl}_3$ )  $\delta$ : 140.8, 136.6, 132.6, 129.4, 125.3, 119.4, 83.7, 76.4, 50.5, 47.9, 44.4, 37.9, 35.8, 31.5, 29.0, 26.3, 25.5, 21.5, 13.8. The NMR spectra were in accord with that reported in literature.<sup>[9]</sup>

### Methyl (*S*)-2-((*tert*-butoxycarbonyl)amino)-3-(4-ethynylphenyl)propanoate (**S59**)

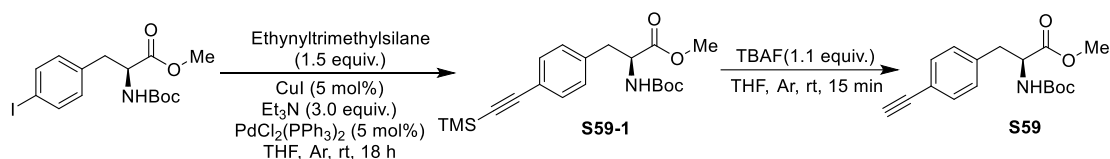

To a stirred solution of (*S*)-2-((*tert*-butoxycarbonyl)amino)-3-(4-iodophenyl)propanoate (1.0 g, 2.46 mmol, 1.0 equiv.),  $\text{PdCl}_2(\text{PPh}_3)_2$  (5 mol%),  $\text{CuI}$  (5 mol%) and triethylamine (3 equiv.) in anhydrous tetrahydrofuran (0.1 M) was added at room temperature. The reaction mixture was bubbled with argon for 5 minutes and ethynyltrimethylsilane (1.5 equiv.) was then added under argon. The reaction mixture was stirred at room temperature for 18 h. Upon complete conversion, the crude reaction mixture was concentrated under vacuum and was purified by column chromatography on silica gel (petroleum ether/ethyl acetate = 10/1) to afford the **S59-1** (822.1 mg, 89% yield).

Next, methyl (*S*)-2-((*tert*-butoxycarbonyl)amino)-3-(4-((trimethylsilyl)ethynyl)phenyl)propanoate **S59-1** (0.50 g, 1.3 mmol, 1.0 equiv.) and TBAF (1.39 mL, 1.4 mmol, 1.1 equiv.) were dissolved in anhydrous tetrahydrofuran (12 mL) in a round bottom flask equipped with a stir bar at room temperature for 15 minutes. Upon complete conversion of the starting material, the crude reaction mixture was concentrated under vacuum and was purified by column chromatography on silica gel (petroleum ether/ethyl acetate = 20/1) to afford the desired product **S59** as a white oil (196.7 mg, 77% yield).<sup>[10]</sup>

$^1\text{H}$  NMR (600 MHz,  $\text{CDCl}_3$ )  $\delta$  7.41 (d,  $J = 7.9$  Hz, 2H), 7.08 (d,  $J = 7.7$  Hz, 2H), 4.99 (d,  $J = 7.4$  Hz, 1H), 4.58 (d,  $J = 6.8$  Hz, 1H), 3.71 (s, 3H), 3.12 (dt,  $J = 20.5, 10.3$  Hz, 1H), 3.08 – 3.05 (m, 1H), 1.41 (s, 9H);  $^{13}\text{C}$  NMR (150 MHz,  $\text{CDCl}_3$ )  $\delta$ : 172.1, 155.0,

137.0, 132.2, 129.3, 120.8, 83.4, 80.0, 77.3, 54.2, 52.3, 38.3, 28.3. The NMR spectra were in accord with that reported in literature.<sup>[10]</sup>

### General procedure 2

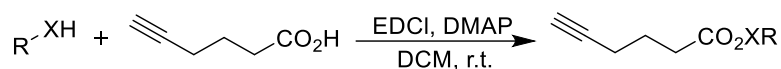

Alcohol or amine hydrochloride (1.0 equiv.), hexa-5-alkynoic acid (1.0 equiv.), EDCI (1.1 equiv.), DMAP (0.1 equiv.) and anhydrous DCM (30.0 mL) were added to a 100 mL Schlenk flask in turn under argon. The reaction mixture was stirred at room temperature for 3 h. After the reaction was completed, the reaction mixture was quenched with water and then extracted with DCM (3 × 10.0 mL). The combined organic layer was dried with Na<sub>2</sub>SO<sub>4</sub> and evaporated under reduced pressure. Then, the residue was purified by column chromatography on silica gel to obtain the product.<sup>[11]</sup>

### (1*S*,2*R*,4*S*)-1,7,7-Trimethylbicyclo[2.2.1]heptan-2-yl hex-5-ynoate (S60)

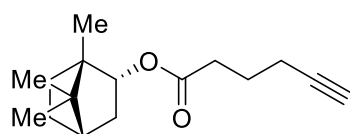

According to **General procedure 2**, **S60** was synthesized using L(-)-borneol (6.0 mmol). The residue was purified by flash column chromatography on silica gel (petroleum ether/ethyl acetate = 5/1) to afford the pure product as a colorless oil (1.1 g, 72% yield).

<sup>1</sup>H NMR (400 MHz, CDCl<sub>3</sub>) δ 4.89 (ddd, *J* = 9.9, 3.3, 2.2 Hz, 1H), 2.46 (t, *J* = 7.4 Hz, 2H), 2.39 – 2.30 (m, 1H), 2.27 (td, *J* = 7.0, 2.6 Hz, 2H), 1.97 (dd, *J* = 5.2, 2.6 Hz, 1H), 1.96 – 1.89 (m, 1H), 1.85 (dd, *J* = 14.5, 7.2 Hz, 2H), 1.79 – 1.68 (m, 1H), 1.66 (d, *J* = 4.5 Hz, 1H), 1.26 (dddd, *J* = 13.8, 12.3, 6.8, 3.3 Hz, 2H), 0.98 – 0.92 (m, 1H), 0.90 (s, 3H), 0.87 (s, 3H), 0.82 (s, 3H); <sup>13</sup>C NMR (100 MHz, CDCl<sub>3</sub>) δ: 173.3, 83.3, 79.9, 69.0, 48.8, 47.8, 44.9, 36.8, 33.4, 28.1, 27.1, 23.8, 19.7, 18.8, 17.9, 13.5. The NMR spectra were in accord with that reported in literature.<sup>[11]</sup>

### (*R*)-*N*-Methyl-*N*-(3-phenyl-3-(*o*-tolylxy)propyl)hex-5-ynamide (S62)

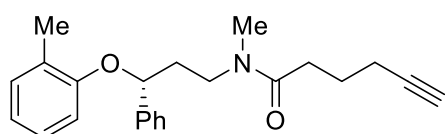

According to **General procedure 2**, **S62** was synthesized using atomoxetine hydrochloride (5 mmol). The residue was purified by flash column chromatography on silica gel (petroleum ether/ethyl acetate = 5/1) to afford the pure product as a colorless oil (1.3 g, 73% yield).

$^1\text{H}$  NMR (600 MHz,  $\text{CDCl}_3$ )  $\delta$ : 7.36 – 7.28 (m, 4H), 7.27 – 7.21 (m, 1H), 7.12 (dd,  $J = 13.5, 7.3$  Hz, 1H), 6.95 (t,  $J = 7.8$  Hz, 1H), 6.81 – 6.74 (m, 1H), 6.57 – 6.53 (m, 1H), 5.16 (td,  $J = 8.0, 4.1$  Hz, 1H), 3.65 – 3.46 (m, 2H), 2.97 (s, 1H), 2.93 (s, 1H), 2.50 – 2.37 (m, 2H), 2.37 – 2.30 (m, 4H), 2.27 (ddd,  $J = 9.2, 8.2, 2.5$  Hz, 1H), 2.22 – 2.05 (m, 3H), 1.96 (dt,  $J = 8.1, 2.4$  Hz, 1H), 1.86 – 1.74 (m, 2H);  $^{13}\text{C}$  NMR (150 MHz,  $\text{CDCl}_3$ )  $\delta$ : 172.2, 172.1, 155.7, 155.3, 141.6, 141.0, 130.7, 130.6, 128.8, 128.6, 127.8, 127.5, 126.8, 126.7, 126.6, 126.5, 125.6, 125.5, 120.6, 120.3, 112.6, 112.4, 83.84, 83.83, 77.5, 76.3, 68.9, 68.8, 46.4, 45.4, 37.5, 36.3, 35.8, 33.4, 31.8, 31.1, 23.8, 23.6, 17.9, 17.8, 16.52, 16.50; HRMS (ESI):  $m/z$  calcd for  $\text{C}_{23}\text{H}_{27}\text{NO}_2\text{Na}$   $[\text{M}+\text{Na}]^+$ : 372.1939, found: 372.1940.

**((3a*R*,5a*S*,8a*S*)-2,2,7,7-Tetramethyltetrahydro-3a*H*-bis([1,3]dioxolo)[4,5-*b*:4',5'-*d*]pyran-3a-yl)methyl hex-5-ynoate (S64)**

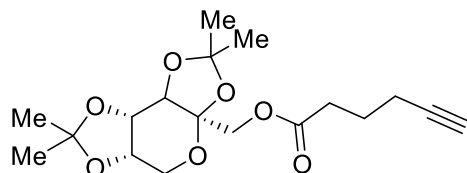

According to **General procedure 2**, **S64** was synthesized using diacetonefructose (5 mmol). The residue was purified by flash column chromatography on silica gel (petroleum ether/ethyl acetate = 20/1) to afford the pure product as a colorless oil (1.3 g, 74% yield).

$^1\text{H}$  NMR (600 MHz,  $\text{CDCl}_3$ )  $\delta$ : 4.58 (dd,  $J = 7.2, 2.6$  Hz, 1H), 4.39 (dd,  $J = 11.7, 3.1$  Hz, 1H), 4.30 – 4.28 (m, 1H), 4.24 – 4.20 (m, 1H), 4.01 (dd,  $J = 11.7, 3.2$  Hz, 1H), 3.92 – 3.86 (m, 1H), 3.78 – 3.71 (m, 1H), 2.52 – 2.45 (m, 2H), 2.29 – 2.22 (m, 2H), 1.97 – 1.93 (m, 1H), 1.88 – 1.81 (m, 2H), 1.52 (d,  $J = 3.0$  Hz, 3H), 1.46 (s, 3H), 1.38 (d,  $J = 5.7$  Hz, 3H), 1.32 (s, 3H);  $^{13}\text{C}$  NMR (150 MHz,  $\text{CDCl}_3$ )  $\delta$ : 172.3, 109.1, 108.7, 101.5, 83.1, 70.7, 70.5, 70.0, 69.2, 65.1, 61.2, 32.6, 26.4, 25.8, 25.2, 24.0, 23.4, 17.7.

The NMR spectra were in accord with that reported in literature.<sup>[11]</sup>

## 6. Synthesis of (*E*)- $\beta$ -functionalized vinylsulfones

### General procedure 3:

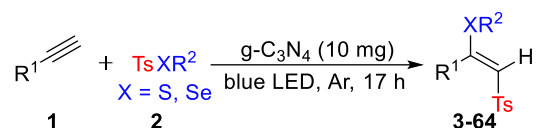

**1** (0.2 mmol) and g-C<sub>3</sub>N<sub>4</sub> (10 mg) were sequentially added to an oven-dried Schlenk tube equipped with a magnetic stir bar under argon atmosphere in DMSO (2 mL) at rt for thiosulfonates (0.4 mmol) and DCM (2 mL) at -20 °C for selenosulfonates (0.4 mmol) under blue LED (7 W) irradiation for 17 h. Upon completion (monitored by TLC), the reaction mixture was filtered. The filtrate was transferred to a separate funnel using 20 mL ethyl acetate and 30 mL water and extracted with ethyl acetate (3 x 20 mL). The combined organic layers were dried with over Na<sub>2</sub>SO<sub>4</sub> and concentrated in vacuo. The residue was purified by flash column chromatography on silica gel to afford the pure products.

### Crystal structure determination of **19**

A suitable crystal of **19** was mounted with glue at the end of a glass fiber. Data collection was performed with a XtaLAB PRO MM007HF-DW diffractometer system equipped with a RA-Micro7HF-MR-DW(Cu/Mo) X-ray generator and Pilatus3R-200K-A detector (Rigaku, Japan, Cu K $\alpha$ ,  $\lambda = 1.54184 \text{ \AA}$ ). The structure was solved by direct methods (SHELXTL-97) and refined by full-matrix least-squares (SHELXTL-97) refinements based on  $F^2$ . Anisotropic thermal parameters were applied to all non-hydrogen atoms. The hydrogen atoms were generated geometrically. Crystal data and structure refinement parameters are summarized in Table S5.

The single crystal suitable for X-ray diffraction was obtained by slow evaporation of a saturated solution of **19** (petroleum ether) in a loosely capped vial and has been deposited with the Cambridge Crystallographic Data Centre (CCDC 2267691). Copies of the data can be obtained free of charge on application to the CCDC, 12 Union Road, Cambridge CB21EZ, UK (fax: (+44)-1223-336-033; e-mail: deposit@ccdc.cam.ac.uk).

**Table S5 Crystal data and structure refinement for 19**

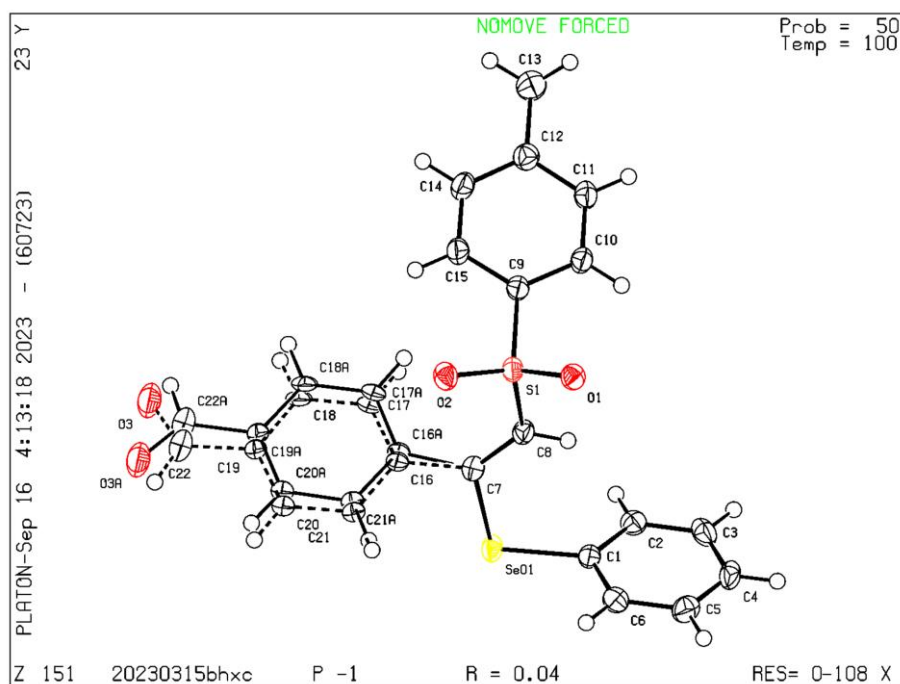

|                                  |                      |
|----------------------------------|----------------------|
| Identification code              | <b>19</b>            |
| Empirical formula                | $C_{22}H_{18}O_3SSe$ |
| Formula weight                   | 441.38               |
| Temperature/K                    | 100(10)              |
| Crystal system                   | triclinic            |
| Space group                      | P-1                  |
| a/Å                              | 7.2763(2)            |
| b/Å                              | 7.6736(3)            |
| c/Å                              | 18.9654(5)           |
| $\alpha/^\circ$                  | 83.579(2)            |
| $\beta/^\circ$                   | 82.280(2)            |
| $\gamma/^\circ$                  | 64.680(3)            |
| Volume/Å <sup>3</sup>            | 946.79(6)            |
| Z                                | 2                    |
| $\rho_{\text{calc}}/\text{cm}^3$ | 1.548                |
| $\mu/\text{mm}^{-1}$             | 3.881                |
| F(000)                           | 448.0                |
| Crystal size/mm <sup>3</sup>     | 0.2 x 0.15 x 0.05    |

|                                                |                                                          |
|------------------------------------------------|----------------------------------------------------------|
| Radiation                                      | Cu K $\alpha$ ( $\lambda = 1.54184$ )                    |
| 2 $\theta$ range for data collection/ $^\circ$ | 4.715 to 71.046                                          |
| Index ranges                                   | $-8 \leq h \leq 5, -9 \leq k \leq 9, -23 \leq l \leq 21$ |
| Reflections collected                          | 7774                                                     |
| Independent reflections                        | 3503 [Rint = 0.0344, Rsigma = 0.0347]                    |
| Data/restraints/parameters                     | 3503/252/270                                             |
| Goodness-of-fit on F <sup>2</sup>              | 1.076                                                    |
| Final R indexes [ $I \geq 2\sigma(I)$ ]        | R1 = 0.0389, wR2 = 0.1051                                |
| Final R indexes [all data]                     | R1 = 0.0404, wR2 = 0.1061                                |
| Largest diff. peak/hole / e $\text{\AA}^{-3}$  | 0.836/-1.085                                             |

### NOESY spectrum of 36

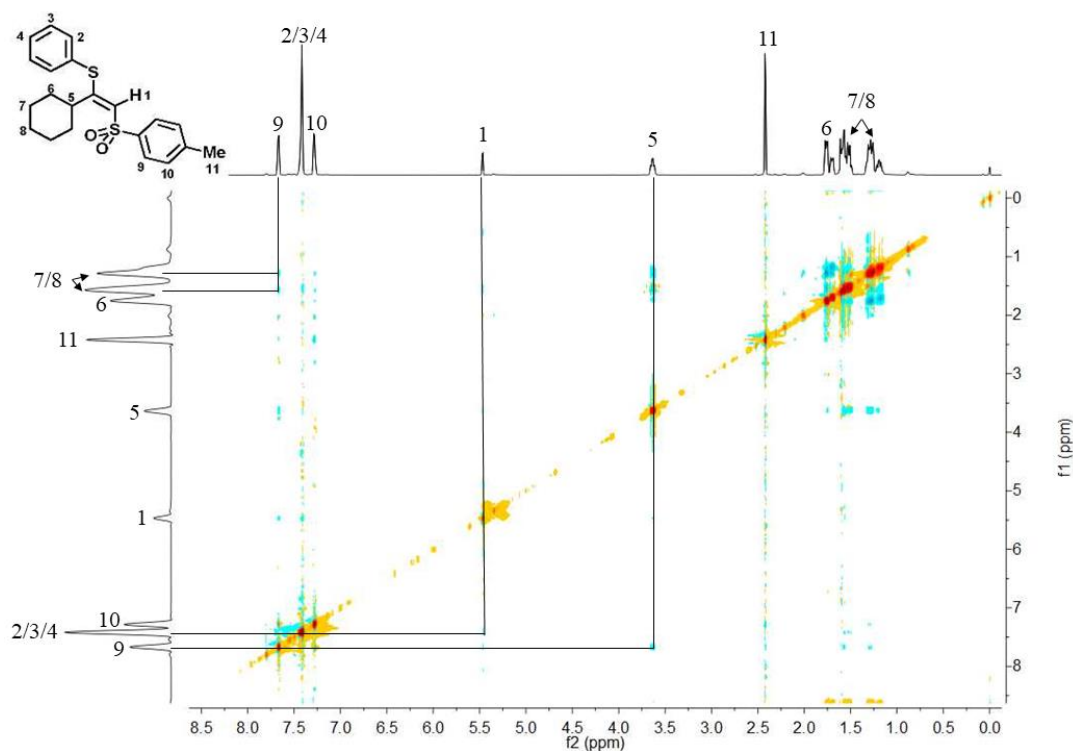

### (*E*)-Phenyl(1-phenyl-2-tosylvinyl)sulfane (3)

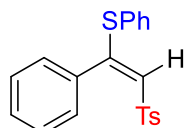

According to **General procedure 3** with phenylacetylene (20.4 mg, 0.20 mmol, 1.0 equiv.) and *S*-phenyl 4-methylbenzenesulfonothioate **2a** (105.8 mg, 0.40 mmol, 2.0 equiv.) for 17 h, the reaction mixture was purified by column chromatography on

silica gel (petroleum ether/ethyl acetate = 20/1) to yield the product **3** as a colorless oil (32.6 mg, 89% yield).

$^1\text{H}$  NMR (600 MHz,  $\text{CDCl}_3$ )  $\delta$ : 7.51 (dd,  $J = 7.6, 1.8$  Hz, 2H), 7.46 – 7.42 (m, 3H), 7.35 (ddd,  $J = 6.7, 4.0, 1.2$  Hz, 1H), 7.30 – 7.27 (m, 4H), 7.25 – 7.22 (m, 2H), 7.10 (d,  $J = 8.0$  Hz, 2H), 5.95 (s, 1H), 2.36 (s, 3H);  $^{13}\text{C}$  NMR (150 MHz,  $\text{CDCl}_3$ )  $\delta$ : 159.5, 143.4, 139.0, 135.3, 133.5, 130.4, 130.1, 129.5, 129.2, 129.0, 128.9, 127.8, 127.3, 122.6, 21.5. The NMR spectra were in accord with that reported in literature.<sup>[12]</sup>

**(E)-Phenyl(1-phenyl-2-tosylvinyl)selane (4)**

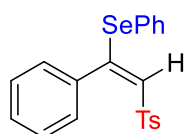

According to **General procedure 3** with phenylacetylene (20.3 mg, 0.20 mmol, 1.0 equiv.) and *Se*-phenyl 4-methylbenzenesulfonoselenoate **2f** (124.4 mg, 0.40 mmol, 2.0 equiv.) for 17 h, the reaction mixture was purified by column chromatography on silica gel (petroleum ether/ethyl acetate = 20/1) to yield the product **4** as a colorless oil (78.5 mg, 95% yield).

$^1\text{H}$  NMR (400 MHz,  $\text{CDCl}_3$ )  $\delta$ : 7.58 (d,  $J = 7.1$  Hz, 2H), 7.42 (dq,  $J = 14.2, 7.2$  Hz, 3H), 7.32 – 7.28 (m, 4H), 7.24 (s, 1H), 7.18 (d,  $J = 7.3$  Hz, 2H), 7.10 (d,  $J = 7.8$  Hz, 2H), 6.15 (s, 1H), 2.36 (s, 3H);  $^{13}\text{C}$  NMR (100 MHz,  $\text{CDCl}_3$ )  $\delta$ : 143.5, 138.8, 136.6, 134.6, 130.2, 130.1, 129.2, 128.4, 127.8, 127.4, 126.8, 125.8, 21.53. The NMR spectra were in accord with that reported in literature.<sup>[13]</sup>

**(E)-Phenyl(1-(p-tolyl)-2-tosylvinyl)sulfane (5)**

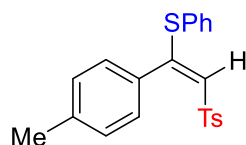

According to **General procedure 3** with 4-ethynyltoluene (24.0 mg, 0.2 mmol, 1.0 equiv.) and *S*-phenyl 4-methylbenzenesulfonothioate **2a** (106.7 mg, 0.4 mmol, 2.0 equiv.) for 17 h, the reaction mixture was purified by column chromatography on silica gel (petroleum ether/ethyl acetate = 20/1) to yield the product **5** as a colorless oil (55.6 mg, 71% yield).

$^1\text{H}$  NMR (400 MHz,  $\text{CDCl}_3$ )  $\delta$ : 7.50 (dd,  $J = 7.2, 2.0$  Hz, 2H), 7.43 (d,  $J = 6.6$  Hz, 3H), 7.31 (d,  $J = 8.2$  Hz, 2H), 7.15 (d,  $J = 8.1$  Hz, 2H), 7.11 (d,  $J = 6.4$  Hz, 4H), 5.89 (s,

1H), 2.37 (s, 6H); <sup>13</sup>C NMR (100 MHz, CDCl<sub>3</sub>) δ: 159.6, 143.4, 139.8, 139.2, 135.3, 130.7, 130.4, 130.1, 129.2, 129.0, 128.5, 127.3, 122.3, 21.5, 21.4; HRMS (ESI): *m/z* calcd for C<sub>22</sub>H<sub>20</sub>O<sub>2</sub>S<sub>2</sub>Na [M+Na]<sup>+</sup>: 403.0797, found: 403.0796.

**(E)-Phenyl(1-(*p*-tolyl)-2-tosylvinyl)selane (6)**

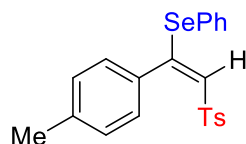

According to **General procedure 3** with 4-ethynyltoluene (23.5 mg, 0.20 mmol, 1.0 equiv.) and *Se*-phenyl 4-methylbenzenesulfonoselenoate **2f** (124.2 mg, 0.40 mmol, 2.0 equiv.) for 17 h, the reaction mixture was purified by column chromatography on silica gel (petroleum ether/ethyl acetate = 20/1) to yield the product **6** as a colorless oil (83.1 mg, 96% yield).

<sup>1</sup>H NMR (400 MHz, CDCl<sub>3</sub>) δ: 7.58 (d, *J* = 7.6 Hz, 2H), 7.40 (dt, *J* = 14.2, 7.0 Hz, 3H), 7.33 (d, *J* = 7.9 Hz, 2H), 7.10 (dd, *J* = 10.7, 6.1 Hz, 6H), 6.09 (s, 1H), 2.37 (d, *J* = 4.6 Hz, 6H); <sup>13</sup>C NMR (100 MHz, CDCl<sub>3</sub>) δ: 143.5, 139.5, 138.9, 136.5, 131.7, 130.1, 130.0, 129.6, 129.2, 128.5, 128.4, 127.4, 127.0, 125.4, 21.5, 21.4. The NMR spectra were in accord with that reported in literature.<sup>[13]</sup>

**(E)-(1-(3-Methoxyphenyl)-2-tosylvinyl)(phenyl)sulfane (7)**

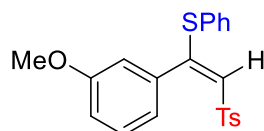

According to **General procedure 3** with 3-ethynylanisole (27.9 mg, 0.2 mmol, 1.0 equiv.) and *S*-phenyl 4-methylbenzenesulfonothioate **2a** (103.5 mg, 0.4 mmol, 2.0 equiv.) for 17 h, the reaction mixture was purified by column chromatography on silica gel (petroleum ether/ethyl acetate = 20/1) to yield the product **7** as a colorless oil (72.5 mg, 87% yield).

<sup>1</sup>H NMR (400 MHz, CDCl<sub>3</sub>) δ: 7.52 (dd, *J* = 7.0, 2.1 Hz, 2H), 7.45 (d, *J* = 6.5 Hz, 3H), 7.29 (d, *J* = 8.2 Hz, 2H), 7.19 (t, *J* = 7.9 Hz, 1H), 7.09 (d, *J* = 8.0 Hz, 2H), 6.88 (dd, *J* = 8.3, 2.2 Hz, 1H), 6.83 (d, *J* = 7.5 Hz, 1H), 6.65 (s, 1H), 5.93 (s, 1H), 3.74 (s, 3H), 2.36 (s, 3H); <sup>13</sup>C NMR (100 MHz, CDCl<sub>3</sub>) δ: 159.1, 158.9, 143.4, 139.0, 135.4, 134.6, 130.5, 130.1, 129.1, 128.9, 128.8, 127.4, 122.8, 121.5, 115.8, 113.9, 55.2, 21.4; HRMS (ESI): *m/z* calcd for C<sub>22</sub>H<sub>20</sub>O<sub>3</sub>S<sub>2</sub>Na [M+Na]<sup>+</sup>: 419.0752, found: 419.0748.



**(E)-(1-(3-Methoxyphenyl)-2-tosylvinyl)(phenyl)selane (8)**

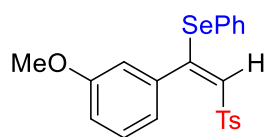

According to **General procedure 3** with 3-ethynylanisole (25.8 mg, 0.20 mmol, 1.0 equiv.) and *Se*-phenyl 4-methylbenzenesulfonoselenoate **2f** (124.8 mg, 0.40 mmol, 2.0 equiv.) for 17 h, the reaction mixture was purified by column chromatography on silica gel (petroleum ether/ethyl acetate = 20/1) to yield the product **8** as a colorless oil (79.5 mg, 92% yield).

$^1\text{H}$  NMR (400 MHz,  $\text{CDCl}_3$ )  $\delta$ : 7.60 (d,  $J = 7.3$  Hz, 2H), 7.42 (dt,  $J = 14.2, 7.1$  Hz, 3H), 7.30 (d,  $J = 7.7$  Hz, 2H), 7.17 (t,  $J = 7.9$  Hz, 1H), 7.09 (d,  $J = 7.8$  Hz, 2H), 6.85 (d,  $J = 8.2$  Hz, 1H), 6.79 (d,  $J = 7.5$  Hz, 1H), 6.60 (s, 1H), 6.14 (s, 1H), 3.73 (s, 3H), 2.36 (s, 3H);  $^{13}\text{C}$  NMR (100 MHz,  $\text{CDCl}_3$ )  $\delta$ : 158.8, 156.7, 143.5, 138.7, 136.6, 135.7, 130.2, 130.1, 129.1, 128.9, 127.5, 126.7, 126.0, 120.9, 115.5, 113.3, 55.1, 21.5; HRMS (ESI):  $m/z$  calcd for  $\text{C}_{22}\text{H}_{20}\text{O}_3\text{SSeNa}$   $[\text{M}+\text{Na}]^+$ : 467.0196, found: 467.0194.

**(E)-(1-(4-Chlorophenyl)-2-tosylvinyl)(phenyl)sulfane (9)**

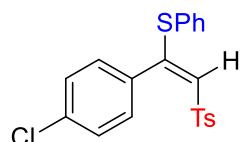

According to **General procedure 3** with 4-chlorophenylacetylene (28.2 mg, 0.2 mmol, 1.0 equiv.) and *S*-phenyl 4-methylbenzenesulfonothioate **2a** (109.0 mg, 0.4 mmol, 2.0 equiv.) for 17 h, the reaction mixture was purified by column chromatography on silica gel (petroleum ether/ethyl acetate = 20/1) to yield the product **9** as a colorless oil (62.2 mg, 75% yield).

$^1\text{H}$  NMR (400 MHz,  $\text{CDCl}_3$ )  $\delta$ : 7.47 (d,  $J = 10.8$  Hz, 5H), 7.34 – 7.27 (m, 3H), 7.17 (dd,  $J = 12.4, 8.3$  Hz, 5H), 5.95 (s, 1H), 2.39 (s, 3H);  $^{13}\text{C}$  NMR (100 MHz,  $\text{CDCl}_3$ )  $\delta$ : 158.0, 143.8, 138.9, 135.8, 135.3, 132.0, 130.6, 130.4, 130.1, 129.3, 128.1, 127.3, 123.2, 21.5; HRMS (ESI):  $m/z$  calcd for  $\text{C}_{21}\text{H}_{18}\text{O}_2\text{S}_2\text{Cl}$   $[\text{M}+\text{H}]^+$ : 401.0437, found: 401.0444.

**(E)-(1-(4-Chlorophenyl)-2-tosylvinyl)(phenyl)selane (10)**

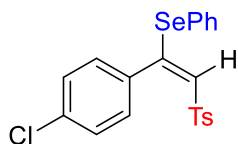

According to **General procedure 3** with 4-chlorophenylacetylene (27.0 mg, 0.20 mmol, 1.0 equiv.) and *Se*-phenyl 4-methylbenzenesulfonoselenoate **2f** (125.4 mg, 0.40 mmol, 2.0 equiv.) for 17 h, the reaction mixture was purified by column chromatography on silica gel (petroleum ether/ethyl acetate = 20/1) to yield the product **10** as a colorless oil (83.3 mg, 94% yield).

$^1\text{H}$  NMR (400 MHz,  $\text{CDCl}_3$ )  $\delta$ : 7.56 (d,  $J = 7.5$  Hz, 2H), 7.47 – 7.42 (m, 1H), 7.39 (t,  $J = 7.3$  Hz, 2H), 7.34 (d,  $J = 7.9$  Hz, 2H), 7.25 (d,  $J = 8.2$  Hz, 2H), 7.15 (t,  $J = 7.1$  Hz, 4H), 6.17 (s, 1H), 2.39 (s, 3H);  $^{13}\text{C}$  NMR (100 MHz,  $\text{CDCl}_3$ )  $\delta$ : 155.5, 143.9, 138.6, 136.45, 135.4, 133.1, 130.2, 129.8, 129.4, 128.1, 127.4, 126.4, 21.5. The NMR spectra were in accord with that reported in literature.<sup>[13]</sup>

**(E)-1-(1-(3-Chlorophenyl)-2-tosylvinyl)(phenyl)sulfane (11)**

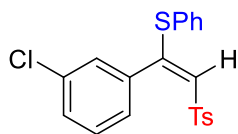

According to **General procedure 3** with 3-chlorophenylacetylene (29.0 mg, 0.2 mmol, 1.0 equiv.) and *S*-phenyl 4-methylbenzenesulfonothioate **2a** (108.1 mg, 0.4 mmol, 2.0 equiv.) for 17 h, the reaction mixture was purified by column chromatography on silica gel (petroleum ether/ethyl acetate = 20/1) to yield the product **11** as a colorless oil (62.0 mg, 73% yield).

$^1\text{H}$  NMR (400 MHz,  $\text{CDCl}_3$ )  $\delta$ : 7.49 (dd,  $J = 17.8, 6.5$  Hz, 6H), 7.29 (d,  $J = 8.5$  Hz, 3H), 7.21 (s, 1H), 7.14 (d,  $J = 8.0$  Hz, 2H), 6.97 (s, 1H), 5.96 (s, 1H), 2.39 (s, 3H);  $^{13}\text{C}$  NMR (100 MHz,  $\text{CDCl}_3$ )  $\delta$ : 143.9, 135.4, 135.1, 133.8, 130.7, 130.2, 129.5, 129.3, 129.2, 128.6, 127.6, 127.3, 123.5, 21.5; HRMS (ESI):  $m/z$  calcd for  $\text{C}_{21}\text{H}_{17}\text{O}_2\text{S}_2\text{ClNa}$  [ $\text{M}+\text{Na}$ ] $^+$ : 423.0256, found: 423.0257.

**(E)-1-(1-(3-Chlorophenyl)-2-tosylvinyl)(phenyl)selane (12)**

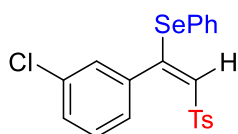

According to **General procedure 3** with 3-chlorophenylacetylene (27.2 mg, 0.20

mmol, 1.0 equiv.) and *Se*-phenyl 4-methylbenzenesulfonoselenoate **2f** (124.0 mg, 0.40 mmol, 2.0 equiv.) for 17 h, the reaction mixture was purified by column chromatography on silica gel (petroleum ether/ethyl acetate = 20/1) to yield the product **12** as a colorless oil (64.1 mg, 72% yield).

<sup>1</sup>H NMR (400 MHz, CDCl<sub>3</sub>) δ: 7.59 – 7.55 (m, 2H), 7.42 (dt, *J* = 14.3, 7.0 Hz, 3H), 7.31 (d, *J* = 8.2 Hz, 2H), 7.24 (dd, *J* = 13.5, 6.1 Hz, 2H), 7.15 (t, *J* = 5.2 Hz, 3H), 6.93 (s, 1H), 6.18 (s, 1H), 2.39 (s, 3H); <sup>13</sup>C NMR (100 MHz, CDCl<sub>3</sub>) δ: <sup>13</sup>C NMR (100 MHz, CDCl<sub>3</sub>) δ: 144.0, 136.6, 136.2, 133.8, 130.3, 130.3, 129.4, 129.2, 128.0, 127.4, 126.9, 126.9, 21.6. The NMR spectra were in accord with that reported in literature.<sup>[14]</sup>

**(*E*)-(1-(2-Chlorophenyl)-2-tosylvinyl)(phenyl)sulfane (13)**

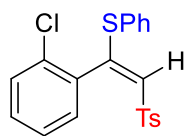

According to **General procedure 3** with 2-chlorophenylacetylene (29.2 mg, 0.2 mmol, 1.0 equiv.) and *S*-phenyl 4-methylbenzenesulfonothioate **2a** (107.9 mg, 0.4 mmol, 2.0 equiv.) for 17 h, the reaction mixture was purified by column chromatography on silica gel (petroleum ether/ethyl acetate = 20/1) to yield the product **13** as a colorless oil (73.8 mg, 86% yield).

<sup>1</sup>H NMR (400 MHz, CDCl<sub>3</sub>) δ: 7.54 (d, *J* = 7.1 Hz, 2H), 7.43 (d, *J* = 7.3 Hz, 3H), 7.37 (d, *J* = 8.1 Hz, 3H), 7.31 (d, *J* = 3.2 Hz, 2H), 7.24 (s, 1H), 7.16 (d, *J* = 8.0 Hz, 2H), 5.98 (s, 1H), 2.39 (s, 3H); <sup>13</sup>C NMR (100 MHz, CDCl<sub>3</sub>) δ: 156.1, 143.8, 138.3, 135.5, 132.8, 132.3, 131.0, 130.5, 130.0, 129.5, 129.3, 128.4, 127.5, 126.2, 123.3, 21.6; HRMS (ESI): *m/z* calcd for C<sub>21</sub>H<sub>17</sub>O<sub>2</sub>S<sub>2</sub>Cl Na [M+Na]<sup>+</sup>: 423.0256, found: 423.0257.

**(*E*)-(1-(2-Chlorophenyl)-2-tosylvinyl)(phenyl)selane (14)**

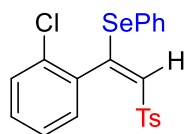

According to **General procedure 3** with 2-chlorophenylacetylene (26.9 mg, 0.20 mmol, 1.0 equiv.) and *Se*-phenyl 4-methylbenzenesulfonoselenoate **2f** (125.2 mg, 0.40 mmol, 2.0 equiv.) for 17 h, the reaction mixture was purified by column

chromatography on silica gel (petroleum ether/ethyl acetate = 20/1) to yield the product **14** as a colorless oil (61.3 mg, 70% yield).

$^1\text{H}$  NMR (400 MHz,  $\text{CDCl}_3$ )  $\delta$ : 7.57 (d,  $J = 7.3$  Hz, 2H), 7.44 – 7.31 (m, 6H), 7.26 (s, 2H), 7.17 (d,  $J = 7.1$  Hz, 3H), 6.25 (s, 1H), 2.39 (s, 3H);  $^{13}\text{C}$  NMR (100 MHz,  $\text{CDCl}_3$ )  $\delta$ : 153.1, 144.0, 138.0, 136.8, 133.5, 132.1, 130.2, 130.1, 130.0, 129.4, 127.6, 127.4, 126.8, 126.1, 21.6. The NMR spectra were in accord with that reported in literature.<sup>[14]</sup>

**(E)-(1-(3-Bromophenyl)-2-tosylvinyl)(phenyl)selane (15)**

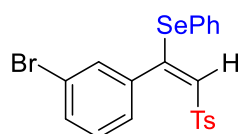

According to **General procedure 3** with 3'-bromophenyl acetylene (36.8 mg, 0.20 mmol, 1.0 equiv.) and *Se*-phenyl 4-methylbenzenesulfonoselenoate **2f** (124.9 mg, 0.40 mmol, 2.0 equiv.) for 17 h, the reaction mixture was purified by column chromatography on silica gel (petroleum ether/ethyl acetate = 20/1) to yield the product **15** as a colorless oil (91.6 mg, 93% yield).

$^1\text{H}$  NMR (400 MHz,  $\text{CDCl}_3$ )  $\delta$ : 7.57 (d,  $J = 7.4$  Hz, 2H), 7.47 – 7.38 (m, 4H), 7.30 (d,  $J = 7.8$  Hz, 2H), 7.22 – 7.13 (m, 4H), 7.05 (s, 1H), 6.19 (s, 1H), 2.39 (s, 3H);  $^{13}\text{C}$  NMR (100 MHz,  $\text{CDCl}_3$ )  $\delta$ : 154.9, 144.0, 138.5, 136.6, 136.5, 132.0, 130.7, 130.3, 130.2, 129.4, 127.4, 127.4, 126.9, 126.2, 121.8, 21.6; HRMS (ESI):  $m/z$  calcd for  $\text{C}_{21}\text{H}_{17}\text{O}_2\text{SSeBrNa}$   $[\text{M}+\text{Na}]^+$ : 514.9196, found: 514.9194.

**(E)-(1-(4-Fluorophenyl)-2-tosylvinyl)(phenyl)sulfane (16)**

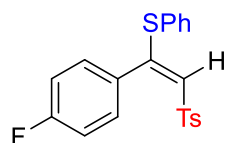

According to **General procedure 3** with 4-fluorophenylacetylene (23.3 mg, 0.2 mmol, 1.0 equiv.) and *S*-phenyl 4-methylbenzenesulfonothioate **2a** (108.1 mg, 0.4 mmol, 2.0 equiv.) for 17 h, the reaction mixture was purified by column chromatography on silica gel (petroleum ether/ethyl acetate = 20/1) to yield the product **16** as a colorless oil (56.9 mg, 74% yield).

$^1\text{H}$  NMR (400 MHz,  $\text{CDCl}_3$ )  $\delta$ : 7.49 (d,  $J = 7.5$  Hz, 2H), 7.45 (t,  $J = 5.8$  Hz, 3H), 7.30 (d,  $J = 8.1$  Hz, 2H), 7.24 – 7.19 (m, 2H), 7.13 (d,  $J = 8.0$  Hz, 2H), 6.97 (t,  $J = 8.6$  Hz,

2H), 5.96 (s, 1H), 2.37 (s, 3H);  $^{13}\text{C}$  NMR (100 MHz,  $\text{CDCl}_3$ )  $\delta$ : 164.7, 143.7, 139.0, 135.2, 131.2 (d,  $J = 4.3$  Hz), 130.5, 130.1, 128.2 (d,  $J = 205.2$  Hz), 123.2, 115.0 (d,  $J = 4.3$  Hz), 21.5;  $^{19}\text{F}$  NMR (376 MHz,  $\text{CDCl}_3$ )  $\delta$ : -110.7; HRMS (ESI):  $m/z$  calcd for  $\text{C}_{21}\text{H}_{18}\text{O}_2\text{S}_2\text{F}$   $[\text{M}+\text{H}]^+$ : 385.0732, found: 385.0728.

**(E)-(1-(4-Fluorophenyl)-2-tosylvinyl)(phenyl)selane (17)**

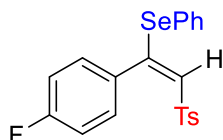

According to **General procedure 3** with 4-fluorophenylacetylene (23.1 mg, 0.20 mmol, 1.0 equiv.) and *Se*-phenyl 4-methylbenzenesulfonoselenoate **2f** (124.6 mg, 0.40 mmol, 2.0 equiv.) for 17 h, the reaction mixture was purified by column chromatography on silica gel (petroleum ether/ethyl acetate = 20/1) to yield the product **17** as a colorless oil (69.9 mg, 81% yield).

$^1\text{H}$  NMR (400 MHz,  $\text{CDCl}_3$ )  $\delta$ : 7.57 – 7.54 (m, 2H), 7.41 (dd,  $J = 16.2, 7.3$  Hz, 3H), 7.32 (d,  $J = 8.2$  Hz, 2H), 7.20 – 7.13 (m, 4H), 6.96 (t,  $J = 8.7$  Hz, 2H), 6.18 (s, 1H), 2.38 (s, 3H);  $^{13}\text{C}$  NMR (100 MHz,  $\text{CDCl}_3$ )  $\delta$ : 164.4, 162.0, 143.8, 138.7, 136.5, 130.6 (d,  $J = 8.5$  Hz), 130.2, 128.3 (d,  $J = 199.7$  Hz), 126.7, 126.4, 115.0 (d,  $J = 21.8$  Hz), 21.5;  $^{19}\text{F}$  NMR (376 MHz,  $\text{CDCl}_3$ )  $\delta$ : -111.12. The NMR spectra were in accord with that reported in literature.<sup>[14]</sup>

**(E)-4-(1-(Phenylthio)-2-tosylvinyl)benzaldehyde (18)**

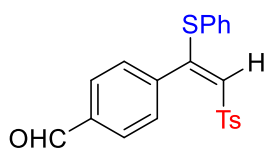

According to **General procedure 3** with 4-ethynylbenzaldehyde (27.1 mg, 0.2 mmol, 1.0 equiv.) and *S*-phenyl 4-methylbenzenesulfonothioate **2a** (105.7 mg, 0.4 mmol, 2.0 equiv.) for 17 h, the reaction mixture was purified by column chromatography on silica gel (petroleum ether/ethyl acetate = 20/1) to yield the product **18** as a colorless oil (61.5 mg, 75% yield).

$^1\text{H}$  NMR (400 MHz,  $\text{CDCl}_3$ )  $\delta$ : 10.04 (s, 1H), 7.82 (d,  $J = 8.1$  Hz, 2H), 7.50 (d,  $J = 7.8$  Hz, 2H), 7.46 (s, 2H), 7.43 (d,  $J = 4.8$  Hz, 2H), 7.40 (s, 1H), 7.33 (d,  $J = 8.2$  Hz, 2H), 7.14 (d,  $J = 8.0$  Hz, 2H), 5.97 (s, 1H), 2.38 (s, 3H);  $^{13}\text{C}$  NMR (100 MHz,  $\text{CDCl}_3$ )  $\delta$ : 191.6, 157.6, 144.0, 139.8, 138.8, 136.7, 135.

4, 130.7, 130.2, 129.8, 129.5, 129.0, 128.2, 127.3, 123.3, 21.6; HRMS (ESI): m/z calcd for C<sub>22</sub>H<sub>18</sub>O<sub>3</sub>S<sub>2</sub>Na [M+Na]<sup>+</sup>: 417.0595, found: 417.0594.

**(E)-4-(1-(Phenylselanyl)-2-tosylvinyl)benzaldehyde (19)**

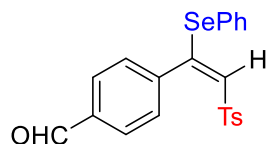

According to **General procedure 3** with 4-ethynylbenzaldehyde (26.2 mg, 0.20 mmol, 1.0 equiv.) and *Se*-phenyl 4-methylbenzenesulfonoselenoate **2f** (122.3 mg, 0.40 mmol, 2.0 equiv.) for 17 h, the reaction mixture was purified by column chromatography on silica gel (petroleum ether/ethyl acetate = 20/1) to yield the product **19** as a colorless oil (69.1 mg, 78% yield).

<sup>1</sup>H NMR (400 MHz, CDCl<sub>3</sub>) δ: 10.02 (s, 1H), 7.80 (d, *J* = 8.1 Hz, 2H), 7.55 (d, *J* = 7.0 Hz, 2H), 7.44 (t, *J* = 7.3 Hz, 1H), 7.40 – 7.33 (m, 6H), 7.15 (d, *J* = 8.0 Hz, 2H), 6.20 (s, 1H), 2.38 (s, 3H); <sup>13</sup>C NMR (100 MHz, CDCl<sub>3</sub>) δ: 191.5, 144.1, 140.9, 138.5, 136.6, 136.4, 136.1, 130.3, 130.2, 129.5, 129.1, 129.0, 127.4, 126.5, 126.2, 21.6; HRMS (ESI): m/z calcd for C<sub>22</sub>H<sub>18</sub>O<sub>3</sub>SSeNa [M+Na]<sup>+</sup>: 465.0040, found: 465.0038.

**(E)-Phenyl(2-tosyl-1-(4-(trifluoromethyl)phenyl)vinyl)sulfane (20)**

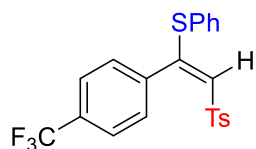

According to **General procedure 3** with 4'-trifluoromethylphenyl acetylene (17.0 mg, 0.1 mmol, 1.0 equiv.) and *S*-phenyl 4-methylbenzenesulfonothioate **2a** (32.2 mg, 0.5 mmol, 5.0 equiv.) for 17 h, the reaction mixture was purified by column chromatography on silica gel (petroleum ether/ethyl acetate = 20/1) to yield the product **20** as a colorless oil (37.0 mg, 85% yield).

<sup>1</sup>H NMR (400 MHz, CDCl<sub>3</sub>) δ: 7.51 (dd, *J* = 10.6, 5.0 Hz, 4H), 7.46 (t, *J* = 6.7 Hz, 3H), 7.33 (d, *J* = 8.1 Hz, 2H), 7.28 (d, *J* = 8.2 Hz, 2H), 7.11 (d, *J* = 8.1 Hz, 2H), 5.99 (s, 1H), 2.37 (s, 3H); <sup>13</sup>C NMR (100 MHz, CDCl<sub>3</sub>) δ: 157.2, 143.9, 138.7, 137.3, 135.4, 131.4 (q, *J* = 32.5 Hz), 130.7, 130.2, 129.5, 129.4, 128.3 (q, *J* = 270.6 Hz), 127.3, 124.8 (q, *J* = 3.7 Hz), 123.8, 21.5; <sup>19</sup>F NMR (376 MHz, CDCl<sub>3</sub>) δ: -62.86; HRMS (ESI): m/z calcd for C<sub>22</sub>H<sub>17</sub>O<sub>2</sub>S<sub>2</sub>F<sub>3</sub>Na [M+Na]<sup>+</sup>: 457.0520, found: 457.0518.

**(E)-4-(1-(Phenylselanyl)-2-tosylvinyl)benzotrile (21)**

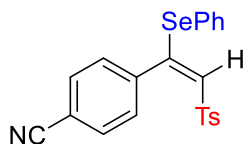

According to **General procedure 3** with 4-ethynylbenzonitrile (26.4 mg, 0.20 mmol, 1.0 equiv.) and *Se*-phenyl 4-methylbenzenesulfonoselenoate **2f** (124.6 mg, 0.40 mmol, 2.0 equiv.) for 17 h, the reaction mixture was purified by column chromatography on silica gel (petroleum ether/ethyl acetate = 20/1) to yield the product **21** as a colorless oil (62.3 mg, 71% yield).

$^1\text{H}$  NMR (400 MHz,  $\text{CDCl}_3$ )  $\delta$ : 7.57 – 7.51 (m, 4H), 7.44 (t,  $J = 7.3$  Hz, 1H), 7.39 – 7.33 (m, 4H), 7.29 (d,  $J = 8.3$  Hz, 2H), 7.18 (d,  $J = 8.1$  Hz, 2H), 6.21 (s, 1H), 2.39 (s, 3H);  $^{13}\text{C}$  NMR (100 MHz,  $\text{CDCl}_3$ )  $\delta$ : 153.9, 144.2, 139.6, 138.3, 136.5, 131.5, 130.4, 130.2, 129.5, 129.1, 127.3, 126.9, 125.9, 118.2, 112.8, 21.5. The NMR spectra were in accord with that reported in literature.<sup>[14]</sup>

**Methyl (*E*)-4-(1-(phenylselanyl)-2-tosylvinyl)benzoate (**22**)**

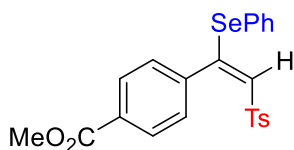

According to **General procedure 3** with methyl 4-ethynylbenzoate (32.4 mg, 0.20 mmol, 1.0 equiv.) and *Se*-phenyl 4-methylbenzenesulfonoselenoate **2f** (123.5 mg, 0.40 mmol, 2.0 equiv.) for 17 h, the reaction mixture was purified by column chromatography on silica gel (petroleum ether/ethyl acetate = 20/1) to yield the product **22** as a colorless oil (86.3 mg, 90% yield).

$^1\text{H}$  NMR (400 MHz,  $\text{CDCl}_3$ )  $\delta$ : 7.94 (d,  $J = 8.3$  Hz, 2H), 7.57 – 7.54 (m, 2H), 7.43 (d,  $J = 7.2$  Hz, 1H), 7.39 (d,  $J = 7.5$  Hz, 2H), 7.32 (d,  $J = 8.2$  Hz, 3H), 7.24 (s, 1H), 7.13 (d,  $J = 8.1$  Hz, 2H), 6.18 (s, 1H), 3.93 (s, 3H), 2.37 (s, 3H);  $^{13}\text{C}$  NMR (100 MHz,  $\text{CDCl}_3$ )  $\delta$ : 166.4, 155.4, 144.0, 139.3, 138.6, 136.5, 130.6, 130.2, 130.2, 129.4, 129.0, 128.4, 127.4, 126.3, 126.3, 52.2, 21.5; HRMS (ESI):  $m/z$  calcd for  $\text{C}_{23}\text{H}_{20}\text{O}_4\text{SSeNa}$   $[\text{M}+\text{Na}]^+$ : 495.0145, found: 495.0148

**(*E*)-1-(1-(Naphthalen-2-yl)-2-tosylvinyl) (phenyl)selane (**23**)**

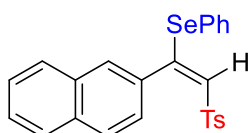

According to **General procedure 3** with naphthylene-2-acetylene (29.3 mg, 0.20 mmol, 1.0 equiv.) and *Se*-phenyl 4-methylbenzenesulfonoselenoate **2f** (124.0 mg, 0.40 mmol, 2.0 equiv.) for 17 h, the reaction mixture was purified by column chromatography on silica gel (petroleum ether/ethyl acetate = 20/1) to yield the product **23** as a colorless oil (68.0 mg, 76% yield).

<sup>1</sup>H NMR (400 MHz, CDCl<sub>3</sub>) δ: 7.82 (d, *J* = 7.6 Hz, 1H), 7.73 (t, *J* = 7.9 Hz, 2H), 7.63 (d, *J* = 6.6 Hz, 2H), 7.57 – 7.49 (m, 3H), 7.46 – 7.38 (m, 3H), 7.32 (d, *J* = 8.4 Hz, 1H), 7.23 (d, *J* = 8.2 Hz, 2H), 6.94 (d, *J* = 8.0 Hz, 2H), 6.24 (s, 1H), 2.28 (s, 3H); <sup>13</sup>C NMR (100 MHz, CDCl<sub>3</sub>) δ: 156.9, 143.6, 138.8, 136.6, 133.3, 132.3, 132.1, 130.2, 130.1, 129.08, 128.3, 128.0, 127.7, 127.5, 127.5, 127.0, 126.4, 125.9, 21.4. The NMR spectra were in accord with that reported in literature.<sup>[14]</sup>

#### (*E*)-(1-(4-Ethynylphenyl)-2-tosylvinyl) (phenyl)selane (**24**)

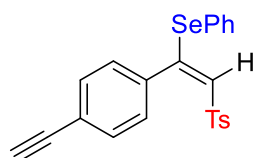

According to **General procedure 3** with 1,4-diethynylbenzene (25.2 mg, 0.20 mmol, 1.0 equiv.) and *Se*-phenyl 4-methylbenzenesulfonoselenoate **2f** (64.5 mg, 0.20 mmol, 1.0 equiv.) for 17 h, the reaction mixture was purified by column chromatography on silica gel (petroleum ether/ethyl acetate = 20/1) to yield the product **24** as a colorless oil (53.3 mg, 52% yield).

<sup>1</sup>H NMR (400 MHz, CDCl<sub>3</sub>) δ: 7.58 – 7.54 (m, 2H), 7.43 (d, *J* = 7.2 Hz, 1H), 7.38 (t, *J* = 7.6 Hz, 4H), 7.32 (d, *J* = 8.2 Hz, 2H), 7.14 (dd, *J* = 8.2, 1.7 Hz, 4H), 6.17 (s, 1H), 3.14 (s, 1H), 2.38 (s, 3H); <sup>13</sup>C NMR (100 MHz, CDCl<sub>3</sub>) δ: 155.8, 143.8, 138.6, 136.5, 135.1, 131.5, 130.2, 129.3, 128.5, 127.4, 126.5, 126.3, 123.1, 83.0, 78.5, 21.5; HRMS (ESI): *m/z* calcd for C<sub>23</sub>H<sub>18</sub>O<sub>2</sub>SSeNa [M+Na]<sup>+</sup>: 461.0090, found: 461.0092.

#### 1,4-Bis((*E*)-1-(phenylselanyl)-2-tosylvinyl)benzene (**25**)

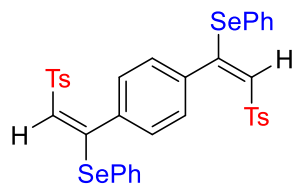

According to **General procedure 3** with 1,4-diethynylbenzene (12.6 mg, 0.1 mmol, 1.0 equiv.) and *Se*-phenyl 4-methylbenzenesulfonoselenoate **2f** (120.8 mg, 0.40 mmol,



4.0 equiv.) for 17 h, the reaction mixture was purified by column chromatography on silica gel (petroleum ether/ethyl acetate = 20/1) to yield the product **25** as a colorless oil (55.9 mg, 75% yield).

$^1\text{H}$  NMR (400 MHz,  $\text{CDCl}_3$ )  $\delta$ : 7.61 (d,  $J$  = 6.9 Hz, 4H), 7.45 (dt,  $J$  = 14.1, 6.9 Hz, 6H), 7.32 (d,  $J$  = 8.1 Hz, 4H), 7.17 (d,  $J$  = 8.0 Hz, 4H), 7.08 (s, 4H), 6.18 (s, 2H), 2.37 (s, 6H);  $^{13}\text{C}$  NMR (100 MHz,  $\text{CDCl}_3$ )  $\delta$ : 156.1, 143.8, 138.8, 136.6, 135.6, 130.3, 129.5, 128.0, 127.6, 126.8, 126.6, 21.6; HRMS (ESI):  $m/z$  calcd for  $\text{C}_{36}\text{H}_{30}\text{O}_4\text{S}_2\text{Se}_2\text{Na}$   $[\text{M}+\text{Na}]^+$ : 772.9814, found: 772.9811

**(E)-4-(1-(Phenylthio)-2-tosylvinyl)pyridine (26)**

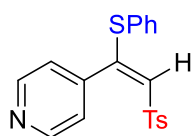

According to **General procedure 3** with 4-ethynylpyridine (20.6 mg, 0.2 mmol, 1.0 equiv.) and *S*-phenyl 4-methylbenzenesulfonothioate **2a** (264.4 mg, 1.0 mmol, 5.0 equiv.) for 17 h, the reaction mixture was purified by column chromatography on silica gel (petroleum ether/ethyl acetate = 10/1) to yield the product **26** as a colorless oil (30.0 mg, 41% yield).

$^1\text{H}$  NMR (400 MHz,  $\text{CDCl}_3$ )  $\delta$ : 7.51 – 7.42 (m, 6H), 7.33 (d,  $J$  = 8.3 Hz, 2H), 7.16 (d,  $J$  = 8.2 Hz, 5H), 5.98 (s, 1H), 2.39 (s, 3H);  $^{13}\text{C}$  NMR (100 MHz,  $\text{CDCl}_3$ )  $\delta$ : 155.8, 149.3, 144.1, 141.9, 138.6, 135.4, 130.8, 130.3, 129.5, 127.9, 127.3, 123.8, 21.5; HRMS (ESI):  $m/z$  calcd for  $\text{C}_{20}\text{H}_{18}\text{NO}_2\text{S}_2$   $[\text{M}+\text{H}]^+$ : 368.0779, found: 368.0776.

**(E)-2-(1-(Phenylthio)-2-tosylvinyl)thiophene (27)**

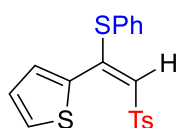

According to **General procedure 3** with 2-ethynylthiophene (21.6 mg, 0.2 mmol, 1.0 equiv.) and *S*-phenyl 4-methylbenzenesulfonothioate **2a** (264.4 mg, 1.0 mmol, 5.0 equiv.) for 17 h, the reaction mixture was purified by column chromatography on silica gel (petroleum ether/ethyl acetate = 20/1) to yield the product **27** as a colorless oil (58.1 mg, 78% yield).

$^1\text{H}$  NMR (600 MHz,  $\text{CDCl}_3$ )  $\delta$ : 7.49 – 7.45 (m, 3H), 7.41 (dt,  $J = 13.0, 8.3$  Hz, 6H), 7.13 (d,  $J = 8.1$  Hz, 2H), 7.01 (dd,  $J = 4.9, 3.8$  Hz, 1H), 6.02 (s, 1H), 2.37 (s, 3H);  $^{13}\text{C}$  NMR (150 MHz,  $\text{CDCl}_3$ )  $\delta$ : 151.1, 143.6, 138.5, 134.9, 133.5, 132.2, 130.4, 130.1, 129.6, 129.5, 129.2, 127.3, 127.2, 124.1, 21.5; HRMS (ESI):  $m/z$  calcd for  $\text{C}_{19}\text{H}_{16}\text{O}_2\text{S}_3\text{Na}$  [ $\text{M}+\text{Na}$ ] $^+$ : 395.0210, found: 395.0208.

**(E)-3-(1-(Phenylthio)-2-tosylvinyl)thiophene (28)**

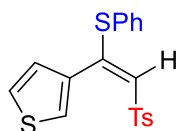

According to **General procedure 3** with 3-ethynylthiophene (21.6 mg, 0.2 mmol, 1.0 equiv.) and *S*-phenyl 4-methylbenzenesulfonothioate **2a** (264.4 mg, 1.0 mmol, 5.0 equiv.) for 17 h, the reaction mixture was purified by column chromatography on silica gel (petroleum ether/ethyl acetate = 10/1) to yield the product **28** as a colorless oil (66.1 mg, 89% yield).

$^1\text{H}$  NMR (400 MHz,  $\text{CDCl}_3$ )  $\delta$ : 7.50 – 7.42 (m, 6H), 7.33 (d,  $J = 8.2$  Hz, 2H), 7.20 (dd,  $J = 5.0, 3.0$  Hz, 1H), 7.12 (d,  $J = 8.0$  Hz, 2H), 7.04 – 7.01 (m, 1H), 5.98 (s, 1H), 2.36 (s, 3H);  $^{13}\text{C}$  NMR (100 MHz,  $\text{CDCl}_3$ )  $\delta$ : 143.5, 138.9, 135.2, 133.2, 130.4, 130.1, 129.2, 128.6, 127.9, 127.2, 125.1, 123.2, 21.5; HRMS (ESI):  $m/z$  calcd for  $\text{C}_{19}\text{H}_{17}\text{O}_2\text{S}_3$  [ $\text{M}+\text{H}$ ] $^+$ : 373.0391, found: 373.0393.

**(E)-3-(1-(Phenylselanyl)-2-tosylvinyl)thiophene (29)**

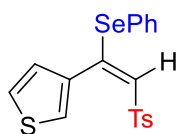

According to **General procedure 3** with 3-ethynylthiophene (22.3 mg, 0.2 mmol, 1.0 equiv.) and Se-phenyl 4-methylbenzenesulfonoselenoate **2f** (93.8 mg, 0.3 mmol, 5.0 equiv.) for 17 h, the reaction mixture was purified by column chromatography on silica gel (petroleum ether/ethyl acetate = 10/1) to yield the product **28** as a colorless oil (33.9 mg, 46% yield).

$^1\text{H}$  NMR (400 MHz,  $\text{CDCl}_3$ )  $\delta$ : 7.57 – 7.55 (m, 2H), 7.41 – 7.33 (m, 6H), 7.19 (dd,  $J = 5.0, 3.0$  Hz, 1H), 7.12 (d,  $J = 8.0$  Hz, 2H), 6.99 (dd,  $J = 5.0, 1.1$  Hz, 1H), 6.20 (s, 1H), 2.36 (s, 3H);  $^{13}\text{C}$  NMR (100 MHz,  $\text{CDCl}_3$ )  $\delta$ : 151.2, 143.5, 138.6, 136.4, 134.2,

130.1, 130.0, 129.2, 128.3, 127.2, 127.0, 126.8, 126.4, 125.2, 21.5; HRMS (ESI):  $m/z$  calcd for  $C_{19}H_{16}O_2NaS_2Se$   $[M+Na]^+$ : 442.9655, found: 442.9651.

**(E)-4-(1-(Phenylthio)-2-tosylvinyl)quinoline (30)**

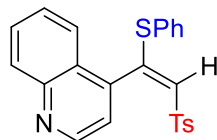

According to **General procedure 3** with 4-ethynylquinoline (30.6 mg, 0.2 mmol, 1.0 equiv.) and *S*-phenyl 4-methylbenzenesulfonothioate **2a** (264.4 mg, 1.0 mmol, 5.0 equiv.) for 17 h, the reaction mixture was purified by column chromatography on silica gel (petroleum ether/ethyl acetate = 10/1) to yield the product **30** as a colorless oil (45.7 mg, 55% yield).

$^1H$  NMR (400 MHz,  $CDCl_3$ )  $\delta$ : 8.85 (d,  $J = 4.3$  Hz, 1H), 8.04 (d,  $J = 8.4$  Hz, 1H), 7.68 – 7.62 (m, 2H), 7.52 (dd,  $J = 7.7, 1.5$  Hz, 2H), 7.47 – 7.36 (m, 5H), 7.22 (d,  $J = 4.3$  Hz, 1H), 7.07 (d,  $J = 8.2$  Hz, 2H), 6.85 (d,  $J = 8.1$  Hz, 2H), 6.25 (s, 1H), 2.21 (s, 3H);  $^{13}C$  NMR (100 MHz,  $CDCl_3$ )  $\delta$ : 154.3, 149.1, 147.9, 143.8, 139.5, 137.5, 135.6, 130.9, 130.2, 129.7, 129.4, 129.1, 127.6, 127.4, 126.9, 125.3, 125.0, 121.7, 21.3; HRMS (ESI):  $m/z$  calcd for  $C_{24}H_{20}NO_2S_2$   $[M+H]^+$ : 418.0935, found: 418.0935.

**(E)-4-(1-(Phenylselanyl)-2-tosylvinyl)quinoline (31)**

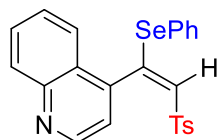

According to **General procedure 3** with 4-ethynylquinoline (30.4 mg, 0.2 mmol, 1.0 equiv.) and *Se*-phenyl 4-methylbenzenesulfonoselenoate **2f** (123.2 mg, 0.4 mmol, 5.0 equiv.) for 17 h, the reaction mixture was purified by column chromatography on silica gel (petroleum ether/ethyl acetate = 10/1) to yield the product **31** as a colorless oil (78.6 mg, 85% yield).

$^1H$  NMR (400 MHz,  $CDCl_3$ )  $\delta$ : 8.79 (d,  $J = 4.4$  Hz, 1H), 8.02 (d,  $J = 8.4$  Hz, 1H), 7.67 – 7.62 (m, 2H), 7.55 – 7.52 (m, 2H), 7.44 – 7.38 (m, 2H), 7.37 – 7.31 (m, 3H), 7.14 – 7.10 (m, 3H), 6.87 (d,  $J = 8.1$  Hz, 2H), 6.51 (s, 1H), 2.22 (s, 3H);  $^{13}C$  NMR (100 MHz,  $CDCl_3$ )  $\delta$ : 151.0, 149.1, 147.8, 144.0, 140.7, 137.2, 136.9, 130.5, 130.1, 129.7, 129.5, 129.2, 128.6, 127.5, 126.7, 125.

5, 125.2, 124.5, 120.7, 21.4; HRMS (ESI):  $m/z$  calcd for  $C_{24}H_{20}NO_2SSe$   $[M+H]^+$ : 466.0380, found: 466.0379.

**(E)-Phenyl(1-tosylprop-1-en-2-yl)sulfane (32)**

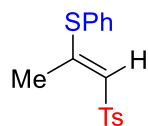

According to **General procedure 3** with propyne (40.0 mg, 1.0 mmol, 5.0 equiv.) and *S*-phenyl 4-methylbenzenesulfonothioate **2a** (53.0 mg, 0.2 mmol, 1.0 equiv.) for 17 h, the reaction mixture was purified by column chromatography on silica gel (petroleum ether/ethyl acetate = 20/1) to yield the product **32** as a colorless oil (39.0 mg, 64% yield).

$^1H$  NMR (600 MHz,  $CDCl_3$ )  $\delta$ : 7.67 (d,  $J = 8.0$  Hz, 2H), 7.43 (q,  $J = 5.9$  Hz, 5H), 7.29 (d,  $J = 8.0$  Hz, 2H), 5.62 (s, 1H), 2.42 (s, 3H), 2.34 (s, 3H);  $^{13}C$  NMR (150 MHz,  $CDCl_3$ )  $\delta$ : 158.0, 143.8, 139.7, 135.5, 130.5, 130.1, 129.7, 128.4, 126.9, 120.1, 21.6, 18.8. HRMS (ESI):  $m/z$  calcd for  $C_{16}H_{16}O_2S_2Na$   $[M+Na]^+$ : 327.0489, found: 327.0486.

**(E)-Phenyl(1-tosylprop-1-en-2-yl)selane (33)**

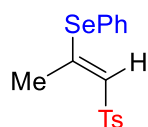

According to **General procedure 3** with propyne (20.0 mg, 0.5 mmol, 5.0 equiv.) and *Se*-phenyl 4-methylbenzenesulfonoselenoate **2f** (31.1 mg, 0.1 mmol, 1.0 equiv.) for 17 h, the reaction mixture was purified by column chromatography on silica gel (petroleum ether/ethyl acetate = 20/1) to yield the product **33** as a colorless oil (22.0 mg, 63% yield).

$^1H$  NMR (600 MHz,  $CDCl_3$ )  $\delta$ : 7.49 – 7.45 (m, 3H), 7.41 (dt,  $J = 13.0, 8.3$  Hz, 6H), 7.13 (d,  $J = 8.1$  Hz, 2H), 7.01 (dd,  $J = 4.9, 3.8$  Hz, 1H), 6.02 (s, 1H), 2.37 (s, 3H);  $^{13}C$  NMR (150 MHz,  $CDCl_3$ )  $\delta$ : 155.6, 143.9, 139.4, 136.6, 130.1, 130.0, 129.8, 126.9, 125.9, 124.0, 21.6, 19.9. The NMR spectra were in accord with that reported in literature.<sup>[15]</sup>

**(E)-Phenyl(1-tosylhex-1-en-2-yl)sulfane (34)**

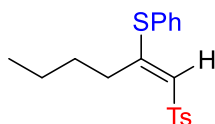

According to **General procedure 3** with 1-hexyne (16.5 mg, 0.2 mmol, 1.0 equiv.) and *S*-phenyl 4-methylbenzenesulfonylthioate **2a** (106.0 mg, 0.4 mmol, 2.0 equiv.) for 17 h, the reaction mixture was purified by column chromatography on silica gel (petroleum ether/ethyl acetate = 20/1) to yield the product **34** as a colorless oil (61.1 mg, 88% yield).

$^1\text{H}$  NMR (400 MHz,  $\text{CDCl}_3$ )  $\delta$ : 7.65 (d,  $J = 7.9$  Hz, 2H), 7.41 (s, 6H), 7.28 (s, 1H), 5.53 (s, 1H), 2.78 – 2.71 (m, 3H), 2.40 (s, 3H), 1.36 (dd,  $J = 14.6, 7.3$  Hz, 3H), 0.89 (t,  $J = 7.2$  Hz, 3H);  $^{13}\text{C}$  NMR (100 MHz,  $\text{CDCl}_3$ )  $\delta$ : 143.7, 139.9, 135.5, 130.3, 130.0, 129.7, 128.5, 126.8, 119.6, 32.0, 32.0, 22.6, 21.5, 13.8; HRMS (ESI):  $m/z$  calcd for  $\text{C}_{19}\text{H}_{22}\text{O}_2\text{S}_2\text{Na}$   $[\text{M}+\text{Na}]^+$ : 369.0959, found: 369.0954.

**(E)-Phenyl(1-tosylhex-1-en-2-yl)selane (35)**

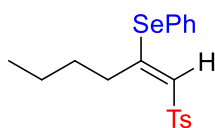

According to **General procedure 3** with 1-hexyne (16.4 mg, 0.2 mmol, 1.0 equiv.) and *Se*-phenyl 4-methylbenzenesulfonoselenoate **2f** (124.2 mg, 0.4 mmol, 2.0 equiv.) for 17 h, the reaction mixture was purified by column chromatography on silica gel (petroleum ether/ethyl acetate = 20/1) to yield the product **35** as a colorless oil (56.3 mg, 72% yield).

$^1\text{H}$  NMR (400 MHz,  $\text{CDCl}_3$ )  $\delta$ : 7.66 (d,  $J = 8.1$  Hz, 2H), 7.52 (d,  $J = 7.1$  Hz, 2H), 7.41 (d,  $J = 7.0$  Hz, 1H), 7.36 (t,  $J = 7.3$  Hz, 2H), 7.28 (d,  $J = 8.1$  Hz, 2H), 5.84 (s, 1H), 2.86 – 2.77 (m, 2H), 2.41 (s, 3H), 1.58 – 1.50 (m, 2H), 1.35 (dd,  $J = 14.9, 7.4$  Hz, 2H), 0.90 – 0.85 (m, 3H);  $^{13}\text{C}$  NMR (100 MHz,  $\text{CDCl}_3$ )  $\delta$ : 161.5, 143.8, 139.5, 136.7, 130.0, 129.9, 129.7, 126.9, 125.9, 123.6, 33.0, 32.1, 22.5, 21.5, 13.8. The NMR spectra were in accord with that reported in literature.<sup>[13]</sup>

**(E)-(1-Cyclohexyl-2-tosylvinyl)(phenyl) sulfane (36)**

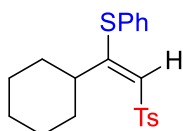

According to **General procedure 3** with cyclohexylacetylene (23.0 mg, 0.2 mmol, 1.0 equiv.) and *S*-phenyl 4-methylbenzenesulfonothioate **2a** (105.9 mg, 0.4 mmol, 2.0 equiv.) for 17 h, the reaction mixture was purified by column chromatography on silica gel (petroleum ether/ethyl acetate = 20/1) to yield the product **36** as a colorless oil (72.1 mg, 91% yield).

$^1\text{H}$  NMR (400 MHz,  $\text{CDCl}_3$ )  $\delta$ : 7.66 (d,  $J = 7.8$  Hz, 2H), 7.40 (s, 5H), 7.27 (d,  $J = 7.8$  Hz, 2H), 5.45 (s, 1H), 3.61 (t,  $J = 10.9$  Hz, 1H), 2.40 (s, 3H), 1.77 – 1.68 (m, 4H), 1.57 – 1.43 (m, 4H), 1.25 (d,  $J = 9.1$  Hz, 2H);  $^{13}\text{C}$  NMR (100 MHz,  $\text{CDCl}_3$ )  $\delta$ : 169.2, 143.6, 140.3, 135.8, 130.2, 130.1, 129.6, 128.5, 126.8, 119.5, 40.9, 31.8, 26.1, 25.6, 21.5; HRMS (ESI):  $m/z$  calcd for  $\text{C}_{21}\text{H}_{24}\text{O}_2\text{S}_2\text{Na}$   $[\text{M}+\text{Na}]^+$ : 395.1115, found: 395.1117.

**(*E*)-(1-Cyclohexyl-2-tosylvinyl)(phenyl)selane (37)**

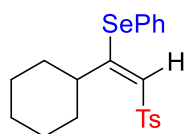

According to **General procedure 3** with cyclohexylacetylene (22.3 mg, 0.2 mmol, 1.0 equiv.) and *Se*-phenyl 4-methylbenzenesulfonoselenoate **2f** (124.4 mg, 0.4 mmol, 2.0 equiv.) for 17 h, the reaction mixture was purified by column chromatography on silica gel (petroleum ether/ethyl acetate = 20/1) to yield the product **37** as a colorless oil (61.2 mg, 73% yield).

$^1\text{H}$  NMR (400 MHz,  $\text{CDCl}_3$ )  $\delta$ : 7.65 (d,  $J = 8.0$  Hz, 2H), 7.49 (d,  $J = 7.2$  Hz, 2H), 7.40 (d,  $J = 6.9$  Hz, 1H), 7.35 (t,  $J = 7.2$  Hz, 2H), 7.26 (s, 2H), 5.71 (s, 1H), 3.64 (t,  $J = 11.4$  Hz, 1H), 2.41 (s, 3H), 1.79 – 1.65 (m, 4H), 1.42 (dt,  $J = 23.3, 11.5$  Hz, 4H), 1.20 (d,  $J = 12.3$  Hz, 2H);  $^{13}\text{C}$  NMR (100 MHz,  $\text{CDCl}_3$ )  $\delta$ : 143.7, 140.0, 137.0, 130.1, 129.8, 129.6, 126.9, 125.8, 123.3, 41.8, 32.5, 25.9, 25.6, 21.6. The NMR spectra were in accord with that reported in literature.<sup>[16]</sup>

**(*E*)-(1-Cyclopropyl-2-tosylvinyl)(phenyl)sulfane (38)**

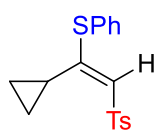

According to **General procedure 3** with ethynylcyclopropane (13.3 mg, 0.2 mmol, 1.0 equiv.) and *S*-phenyl 4-methylbenzenesulfonothioate **2a** (107.3 mg, 0.4 mmol, 2.0 equiv.) for 17 h, the reaction mixture was purified by column chromatography on silica gel (petroleum ether/ethyl acetate = 20/1) to yield the product **38** as a colorless oil (23.1 mg, 35% yield).

$^1\text{H}$  NMR (400 MHz,  $\text{CDCl}_3$ )  $\delta$ : 7.68 (d,  $J = 8.2$  Hz, 2H), 7.43 – 7.35 (m, 5 H), 7.28 (d,  $J = 8.1$  Hz, 2H), 5.59 (s, 1H), 2.92 – 2.85 (m, 1H), 2.42 (s, 3H), 1.04 – 1.00 (m, 2H), 0.94 (dt,  $J = 8.5, 3.1$  Hz, 2H);  $^{13}\text{C}$  NMR (100 MHz,  $\text{CDCl}_3$ )  $\delta$ : 164.2, 143.5, 140.1, 135.4, 130.2, 130.1, 129.6, 128.2, 126.7, 121.5, 21.5, 13.7, 8.4; HRMS (ESI):  $m/z$  calcd for  $\text{C}_{18}\text{H}_{18}\text{O}_2\text{S}_2\text{Na}$   $[\text{M}+\text{Na}]^+$ : 353.0646, found: 353.0641.

#### **(E)-(1-Cyclopropyl-2-tosylvinyl)(phenyl)selane (39)**

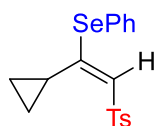

According to **General procedure 3** with ethynylcyclopropane (13.2 mg, 0.2 mmol, 1.0 equiv.) and *Se*-phenyl 4-methylbenzenesulfonoselenoate **2f** (123.3 mg, 0.4 mmol, 2.0 equiv.) for 17 h, the reaction mixture was purified by column chromatography on silica gel (petroleum ether/ethyl acetate = 20/1) to yield the product **39** as a colorless oil (56.9 mg, yield 75%).

$^1\text{H}$  NMR (400 MHz,  $\text{CDCl}_3$ )  $\delta$ : 7.68 (d,  $J = 8.2$  Hz, 2H), 7.46 – 7.41 (m, 2H), 7.39 (d,  $J = 7.2$  Hz, 1H), 7.34 (t,  $J = 7.2$  Hz, 2H), 7.28 (d,  $J = 8.0$  Hz, 2H), 5.87 (s, 1H), 2.93 – 2.86 (m, 1H), 2.42 (s, 3H), 0.96 (dd,  $J = 5.4, 3.1$  Hz, 4H);  $^{13}\text{C}$  NMR (100 MHz,  $\text{CDCl}_3$ )  $\delta$ : 163.1, 143.6, 139.6, 136.2, 130.1, 129.7, 129.6, 126.8, 125.8, 125.7, 21.5, 14.7, 9.2. The NMR spectra were in accord with that reported in literature.<sup>[13]</sup>

#### **(E)-Phenyl(3-phenyl-1-tosylprop-1-en-2-yl)sulfane (40)**

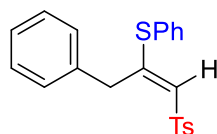

According to **General procedure 3** with 3-phenyl-1-propyne (26.7 mg, 0.2 mmol, 1.0 equiv.) and *S*-phenyl 4-methylbenzenesulfonothioate **2a** (106.2 mg, 0.4 mmol, 2.0 equiv.) for 17 h, the reaction mixture was purified by column chro

matography on silica gel (petroleum ether/ethyl acetate = 20/1) to yield the product **40** as a colorless oil (70.4 mg, 81% yield).

$^1\text{H}$  NMR (400 MHz,  $\text{CDCl}_3$ )  $\delta$ : 7.58 (d,  $J = 8.0$  Hz, 2H), 7.44 – 7.33 (m, 6H), 7.28 (s, 1H), 7.22 (d,  $J = 6.9$  Hz, 5H), 5.70 (s, 1H), 4.22 (s, 2H), 2.39 (s, 3H);  $^{13}\text{C}$  NMR (100 MHz,  $\text{CDCl}_3$ )  $\delta$ : 160.5, 143.8, 139.4, 136.5, 135.5, 130.3, 130.0, 129.7, 129.0, 128.4, 126.9, 121.0, 37.0, 21.5; HRMS (ESI):  $m/z$  calcd for  $\text{C}_{22}\text{H}_{20}\text{O}_2\text{S}_2\text{Na}$   $[\text{M}+\text{Na}]^+$ : 403.0802, found: 403.0800.

#### (*E*)-Phenyl(3-phenyl-1-tosylprop-1-en-2-yl)selane (**41**)

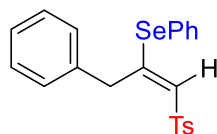

According to **General procedure 3** with 3-phenyl-1-propyne (23.4 mg, 0.2 mmol, 1.0 equiv.) and *Se*-phenyl 4-methylbenzenesulfonoselenoate **2f** (125.3 mg, 0.4 mmol, 2.0 equiv.) for 17 h, the reaction mixture was purified by column chromatography on silica gel (petroleum ether/ethyl acetate = 20/1) to yield the product **41** as a colorless oil (72.7 mg, 85% yield).

$^1\text{H}$  NMR (400 MHz,  $\text{CDCl}_3$ )  $\delta$ : 7.64 (d,  $J = 8.2$  Hz, 2H), 7.47 – 7.38 (m, 3H), 7.35 (d,  $J = 7.5$  Hz, 2H), 7.28 (dd,  $J = 6.9, 5.5$  Hz, 5H), 7.21 – 7.17 (m, 2H), 6.00 (s, 1H), 4.31 (s, 2H), 2.42 (s, 3H);  $^{13}\text{C}$  NMR (100 MHz,  $\text{CDCl}_3$ )  $\delta$ : 159.0, 144.0, 139.2, 136.6, 136.5, 130.0, 129.9, 129.8, 129.2, 128.5, 127.1, 127.0, 126.1, 125.0, 38.3, 21.6.; HRMS (ESI):  $m/z$  calcd for  $\text{C}_{22}\text{H}_{20}\text{O}_2\text{SSeNa}$   $[\text{M}+\text{Na}]^+$ : 451.0241, found: 451.0240.

#### (*E*)-Phenyl(4-phenyl-1-tosylbut-1-en-2-yl)sulfane (**42**)

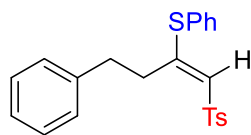

According to **General procedure 3** with 4-phenyl-1-butyne (25.8 mg, 0.2 mmol, 1.0 equiv.) and *S*-phenyl 4-methylbenzenesulfonothioate **2a** (105.1 mg, 0.4 mmol, 2.0 equiv.) for 17 h, the reaction mixture was purified by column chromatography on silica gel (petroleum ether/ethyl acetate = 20/1) to yield the product **42** as a colorless oil (66.9 mg, 86% yield).

$^1\text{H}$  NMR (400 MHz,  $\text{CDCl}_3$ )  $\delta$ : 7.65 (d,  $J = 8.3$  Hz, 2H), 7.44 (s, 5H), 7.34 – 7.29 (m, 3H), 7.28 (d,  $J = 1.5$  Hz, 3H), 7.23 (d,  $J = 7.1$  Hz, 1H), 5.61 (s, 1H), 3.09 – 3.03 (m,



2H), 3.00 – 2.95 (m, 2H), 2.41 (s, 3H);  $^{13}\text{C}$  NMR (100 MHz,  $\text{CDCl}_3$ )  $\delta$ : 161.5, 143.8, 140.5, 139.7, 135.5, 130.4, 130.0, 129.7, 128.5, 128.43, 128.36, 126.8, 126.3, 120.0, 36.2, 34.5, 21.5; HRMS (ESI):  $m/z$  calcd for  $\text{C}_{23}\text{H}_{22}\text{O}_2\text{S}_2\text{Na}$   $[\text{M}+\text{Na}]^+$ : 417.0959, found: 417.0961.

**(E)-Phenyl(4-phenyl-1-tosylbut-1-en-2-yl)selane (43)**

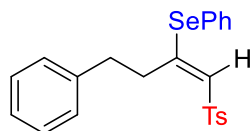

According to **General procedure 3** with 4-phenyl-1-butyne (12.8 mg, 0.2 mmol, 1.0 equiv.) and *Se*-phenyl 4-methylbenzenesulfonoselenoate **1ab** (62.5 mg, 0.2 mmol, 2.0 equiv.) for 17 h, the reaction mixture was purified by column chromatography on silica gel (petroleum ether/ethyl acetate = 20/1) to yield the product **43** as a colorless oil (36.1 mg, 83% yield).

$^1\text{H}$  NMR (400 MHz,  $\text{CDCl}_3$ )  $\delta$ : 7.67 (d,  $J = 8.2$  Hz, 2H), 7.58 – 7.53 (m, 2H), 7.45 (t,  $J = 7.3$  Hz, 1H), 7.39 (t,  $J = 7.3$  Hz, 2H), 7.30 (dd,  $J = 15.2, 8.0$  Hz, 4H), 7.26 – 7.20 (m, 3H), 5.95 (s, 1H), 3.13 (dd,  $J = 10.2, 6.2$  Hz, 2H), 2.95 (dd,  $J = 10.3, 6.2$  Hz, 2H), 2.42 (s, 3H);  $^{13}\text{C}$  NMR (100 MHz,  $\text{CDCl}_3$ )  $\delta$ : 159.6, 143.9, 140.4, 139.3, 136.7, 130.1, 129.9, 129.8, 128.5, 128.4, 126.9, 126.3, 125.8, 124.0, 36.3, 35.4, 21.5. The NMR spectra were in accord with that reported in literature.<sup>[14]</sup>

**(E)-(5-Chloro-1-tosylpent-1-en-2-yl)(phenyl) sulfane (44)**

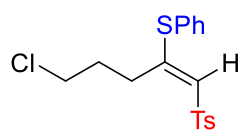

According to **General procedure 3** with 5-chloro-1-pentyne (21.9 mg, 0.2 mmol, 1.0 equiv.) and *S*-phenyl 4-methylbenzenesulfonothioate **2a** (105.8 mg, 0.4 mmol, 2.0 equiv.) for 17 h, the reaction mixture was purified by column chromatography on silica gel (petroleum ether/ethyl acetate = 20/1) to yield the product **44** as a colorless oil (55.0 mg, 75% yield).

$^1\text{H}$  NMR (400 MHz,  $\text{CDCl}_3$ )  $\delta$ : 7.66 (d,  $J = 8.2$  Hz, 2H), 7.45 – 7.41 (m, 5H), 7.30 (d,  $J = 8.2$  Hz, 2H), 5.58 (s, 1H), 3.61 (t,  $J = 6.5$  Hz, 2H), 2.94 – 2.88 (m, 2H), 2.42 (s, 3H), 2.18 – 2.10 (m, 2H);  $^{13}\text{C}$  NMR (100 MHz,  $\text{CDCl}_3$ )  $\delta$ : 161.0, 143.9, 139.5, 135.4, 130.5, 130.1, 129.8, 128.1, 126.8, 120.5, 44.2, 32.7, 29.8, 21.5; HRMS (ESI):  $m/z$

calcd for C<sub>18</sub>H<sub>19</sub>O<sub>2</sub>S<sub>2</sub>ClNa [M+Na]<sup>+</sup>: 389.0413, found: 389.0415.

**(E)-(5-Chloro-1-tosylpent-1-en-2-yl) (phenyl)selane (45)**

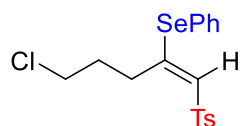

According to **General procedure 3** with 5-chloro-1-pentyne (20.7 mg, 0.2 mmol, 1.0 equiv.) and *Se*-phenyl 4-methylbenzenesulfonoselenoate **2f** (122.6 mg, 0.4 mmol, 2.0 equiv.) for 17 h, the reaction mixture was purified by column chromatography on silica gel (petroleum ether/ethyl acetate = 20/1) to yield the product **45** as a colorless oil (67.9 mg, 82% yield).

<sup>1</sup>H NMR (400 MHz, CDCl<sub>3</sub>) δ: 7.67 (d, *J* = 8.2 Hz, 2H), 7.53 – 7.50 (m, 2H), 7.45 – 7.41 (m, 1H), 7.37 (t, *J* = 7.3 Hz, 2H), 7.30 (d, *J* = 8.1 Hz, 2H), 5.90 (s, 1H), 3.59 (t, *J* = 6.5 Hz, 2H), 2.97 (dd, *J* = 9.0, 6.6 Hz, 2H), 2.42 (s, 3H), 2.15 – 2.07 (m, 2H); <sup>13</sup>C NMR (100 MHz, CDCl<sub>3</sub>) δ: 158.9, 144.1, 139.1, 136.6, 130.1, 130.03, 129.8, 126.9, 125.7, 124.6, 44.1, 32.9, 30.8, 21.6; HRMS (ESI): *m/z* calcd for C<sub>18</sub>H<sub>20</sub>O<sub>2</sub>SClSe [M+H]<sup>+</sup>: 415.0038, found: 415.0040.

**(E)-2-(Phenylthio)-3-tosylallylacetate (46)**

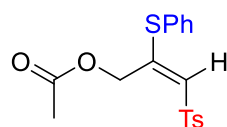

According to **General procedure 3** with propargyl acetate (20.5 mg, 0.2 mmol, 1.0 equiv.) and *S*-phenyl 4-methylbenzenesulfonothioate **2a** (105.6 mg, 0.4 mmol, 2.0 equiv.) for 17 h, the reaction mixture was purified by column chromatography on silica gel (petroleum ether/ethyl acetate = 20/1) to yield the product **46** as a colorless oil (60.0 mg, 79% yield).

<sup>1</sup>H NMR (400 MHz, CDCl<sub>3</sub>) δ: 7.69 (d, *J* = 7.8 Hz, 2H), 7.42 (s, 5H), 7.30 (d, *J* = 7.8 Hz, 2H), 5.52 (s, 1H), 5.39 (s, 2H), 2.42 (s, 3H), 2.13 (s, 3H); <sup>13</sup>C NMR (100 MHz, CDCl<sub>3</sub>) δ: 170.0, 156.8, 144.2, 138.7, 135.5, 130.6, 130.2, 129.8, 127.3, 127.0, 121.0, 60.9, 21.6, 20.6; HRMS (ESI): *m/z* calcd for C<sub>18</sub>H<sub>18</sub>O<sub>4</sub>S<sub>2</sub>Na [M+Na]<sup>+</sup>: 385.0544, found: 385.0540.

**(E)-2-(Phenylselanyl)-3-tosylallylacetate (47)**

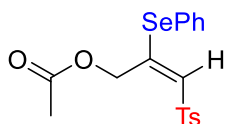

According to **General procedure 3** with propargyl acetate (19.3 mg, 0.2 mmol, 1.0 equiv.) and *Se*-phenyl 4-methylbenzenesulfonoselenoate **2f** (125.5 mg, 0.4 mmol, 2.0 equiv.) for 17 h, the reaction mixture was purified by column chromatography on silica gel (petroleum ether/ethyl acetate = 20/1) to yield the product **47** as a colorless oil (57.1 mg, 71% yield).

$^1\text{H}$  NMR (400 MHz,  $\text{CDCl}_3$ )  $\delta$ : 7.69 (d,  $J = 8.2$  Hz, 2H), 7.50 (d,  $J = 7.0$  Hz, 2H), 7.43 (d,  $J = 7.3$  Hz, 1H), 7.37 (t,  $J = 7.4$  Hz, 2H), 7.30 (d,  $J = 8.1$  Hz, 2H), 5.70 (s, 1H), 5.48 (d,  $J = 1.4$  Hz, 2H), 2.41 (s, 3H), 2.13 (s, 3H);  $^{13}\text{C}$  NMR (100 MHz,  $\text{CDCl}_3$ )  $\delta$ : 169.9, 155.9, 144.3, 138.4, 136.9, 130.3, 130.3, 129.9, 127.1, 124.9, 123.8, 62.3, 21.6, 20.6; HRMS (ESI):  $m/z$  calcd for  $\text{C}_{18}\text{H}_{18}\text{O}_4\text{SSeNa}$   $[\text{M}+\text{Na}]^+$ : 432.9989, found: 432.9990.

**(E)-3-(Phenylthio)-4-tosylbut-3-en-2-one (48)**

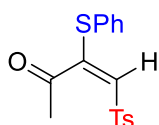

According to **General procedure 3** with 3-butyn-2-one (15.4 mg, 0.2 mmol, 1.0 equiv.) and *S*-phenyl 4-methylbenzenesulfonothioate **2a** (104.2 mg, 0.4 mmol, 2.0 equiv.) for 17 h, the reaction mixture was purified by column chromatography on silica gel (petroleum ether/ethyl acetate = 20/1) to yield the product **48** as a colorless oil (43.4 mg, 58% yield).

$^1\text{H}$  NMR (400 MHz,  $\text{CDCl}_3$ )  $\delta$ : 7.69 (d,  $J = 8.3$  Hz, 2H), 7.45 (dt,  $J = 12.7, 5.0$  Hz, 5H), 7.31 (d,  $J = 8.1$  Hz, 2H), 5.57 (s, 1H), 2.54 (s, 3H), 2.42 (s, 3H);  $^{13}\text{C}$  NMR (100 MHz,  $\text{CDCl}_3$ )  $\delta$ : 198.2, 157.9, 144.5, 137.6, 135.5, 130.8, 130.2, 129.9, 127.7, 126.2, 119.8, 30.9, 21.6; HRMS (ESI):  $m/z$  calcd for  $\text{C}_{17}\text{H}_{16}\text{O}_3\text{S}_2\text{Na}$   $[\text{M}+\text{Na}]^+$ : 355.0433, found: 355.0430.

**(E)-3-(Phenylselenanyl)-4-tosylbut-3-en-2-one (49)**

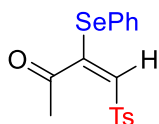

According to **General procedure 3** with 3-butyn-2-one (13.4 mg, 0.2 mmol, 1.0 equiv.) and *Se*-phenyl 4-methylbenzenesulfonoselenoate **2f** (126.0 mg, 0.4 mmol, 2.0 equiv.) for 17 h, the reaction mixture was purified by column chromatography on silica gel (petroleum ether/ethyl acetate = 20/1) to yield the product **49** as a colorless oil (43.9 mg, 59% yield).

$^1\text{H}$  NMR (400 MHz,  $\text{CDCl}_3$ )  $\delta$ : 7.71 (d,  $J = 8.3$  Hz, 2H), 7.56 – 7.54 (m, 2H), 7.44 (d,  $J = 7.4$  Hz, 1H), 7.39 (d,  $J = 7.5$  Hz, 2H), 7.32 (d,  $J = 8.1$  Hz, 2H), 5.86 (s, 1H), 2.47 (s, 3H), 2.43 (s, 3H);  $^{13}\text{C}$  NMR (100 MHz,  $\text{CDCl}_3$ )  $\delta$ : 199.2, 144.7, 137.2, 136.7, 130.5, 130.2, 130.0, 127.8, 123.9, 123.3, 30.7, 21.7; HRMS (ESI):  $m/z$  calcd for  $\text{C}_{17}\text{H}_{16}\text{O}_3\text{SSeNa}$   $[\text{M}+\text{Na}]^+$ : 402.9883, found: 402.9886.

**(*E*)-(1-(Cyclohex-1-en-1-yl)-2-tosylvinyl) (phenyl)sulfane (50)**

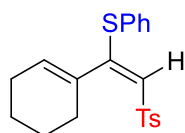

According to **General procedure 3** with 1-ethynylcyclohex-1-ene (21.3 mg, 0.2 mmol, 1.0 equiv.) and *S*-phenyl 4-methylbenzenesulfonothioate **2a** (105.5 mg, 0.4 mmol, 2.0 equiv.) for 17 h, the reaction mixture was purified by column chromatography on silica gel (petroleum ether/ethyl acetate = 20/1) to yield the product **50** as a colorless oil (58.7 mg, 79% yield).

$^1\text{H}$  NMR (400 MHz,  $\text{CDCl}_3$ )  $\delta$ : 7.65 (d,  $J = 8.2$  Hz, 2H), 7.46 – 7.38 (m, 6H), 7.28 (s, 1H), 5.79 (s, 1H), 5.53 (s, 1H), 2.42 (s, 3H), 2.08 (d,  $J = 1.8$  Hz, 2H), 1.98 (d,  $J = 2.0$  Hz, 2H), 1.50 (s, 4H);  $^{13}\text{C}$  NMR (100 MHz,  $\text{CDCl}_3$ )  $\delta$ : 162.5, 143.5, 140.0, 135.3, 132.4, 131.2, 130.0, 129.8, 129.3, 129.3, 127.4, 121.0, 28.4, 25.2, 22.1, 21.5, 21.2; HRMS (ESI):  $m/z$  calcd for  $\text{C}_{21}\text{H}_{22}\text{O}_2\text{S}_2\text{Na}$   $[\text{M}+\text{Na}]^+$ : 393.0959, found: 393.0960.

**(*E*)-(1-(Cyclohex-1-en-1-yl)-2-tosylvinyl) (phenyl)selane (51)**

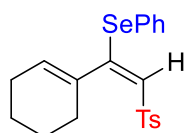

According to **General procedure 3** with 1-ethynylcyclohex-1-ene (21.3 mg, 0.2 mmol, 1.0 equiv.) and *Se*-phenyl 4-methylbenzenesulfonoselenoate **2f** (124.5 mg, 0.4 mmol, 2.0 equiv.) for 17 h, the reaction mixture was purified by column chromatography on silica gel (petroleum ether/ethyl acetate = 20/1) to yield the

product **51** as a colorless oil (55.9 mg, 67% yield).

$^1\text{H}$  NMR (600 MHz,  $\text{CDCl}_3$ )  $\delta$ : 7.65 (d,  $J = 8.0$  Hz, 2H), 7.52 (d,  $J = 7.7$  Hz, 2H), 7.40 (t,  $J = 7.3$  Hz, 1H), 7.35 (t,  $J = 7.4$  Hz, 2H), 7.27 (d,  $J = 7.8$  Hz, 2H), 6.05 (s, 1H), 5.47 (s, 1H), 2.41 (s, 3H), 2.05 (s, 2H), 1.93 (s, 2H), 1.45 (d,  $J = 2.3$  Hz, 4H);  $^{13}\text{C}$  NMR (150 MHz,  $\text{CDCl}_3$ )  $\delta$ : 160.4, 143.7, 139.7, 136.6, 133.4, 130.1, 129.73, 129.66, 129.4, 127.6, 126.8, 124.2, 28.4, 25.1, 22.0, 21.6, 21.1. The NMR spectra were in accord with that reported in literature.<sup>[17]</sup>

**(E)-(4-Methoxyphenyl)(1-phenyl-2-tosylvinyl)sulfane (52)**

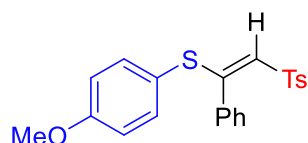

According to **General procedure 3** with phenylacetylene (20.4 mg, 0.2 mmol, 1.0 equiv.) and *S*-(4-methoxyphenyl) 4-methylbenzenesulfonothioate **2g** (140.2 mg, 0.4 mmol, 2.0 equiv.) for 17 h, the reaction mixture was purified by column chromatography on silica gel (petroleum ether/ethyl acetate = 20/1) to yield the product **52** as a colorless oil (58.1 mg, 64% yield).

$^1\text{H}$  NMR (400 MHz,  $\text{CDCl}_3$ )  $\delta$ : 7.43 (d,  $J = 8.4$  Hz, 2H), 7.35 (t,  $J = 7.3$  Hz, 1H), 7.28 (t,  $J = 8.2$  Hz, 4H), 7.20 (d,  $J = 7.5$  Hz, 2H), 7.09 (d,  $J = 7.9$  Hz, 2H), 6.96 (d,  $J = 8.4$  Hz, 2H), 5.86 (s, 1H), 3.85 (s, 3H), 2.36 (s, 3H);  $^{13}\text{C}$  NMR (100 MHz,  $\text{CDCl}_3$ )  $\delta$ : 161.4, 160.7, 143.3, 139.3, 137.0, 133.6, 129.4, 129.1, 129.0, 127.8, 127.3, 122.2, 119.4, 115.7, 55.4, 21.5; HRMS (ESI):  $m/z$  calcd for  $\text{C}_{22}\text{H}_{20}\text{O}_3\text{S}_2\text{Na}$   $[\text{M}+\text{Na}]^+$ : 419.0752, found: 419.0751.

**(E)-(1-Phenyl-2-tosylvinyl)(*p*-tolyl)sulfane (53)**

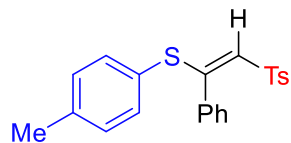

According to **General procedure 3** with phenylacetylene (20.4 mg, 0.2 mmol, 1.0 equiv.) and *S*-(*p*-tolyl) 4-methylbenzenesulfonothioate **2b** (111.4 mg, 0.4 mmol, 2.0 equiv.) for 17 h, the reaction mixture was purified by column chromatography on silica gel (petroleum ether/ethyl acetate = 20/1) to yield the product **53** as a colorless oil (47.0 mg, 62% yield).

$^1\text{H}$  NMR (600 MHz,  $\text{CDCl}_3$ )  $\delta$ : 7.40 (d,  $J = 7.9$  Hz, 2H), 7.35 (t,  $J = 7.3$  Hz, 1H), 7.27 (dt,  $J = 7.5, 6.0$  Hz, 6H), 7.21 (d,  $J = 7.5$  Hz, 2H), 7.09 (d,  $J = 8.0$  Hz, 2H), 5.90 (s, 1H), 2.40 (s, 3H), 2.36 (s, 3H);  $^{13}\text{C}$  NMR (150 MHz,  $\text{CDCl}_3$ )  $\delta$ : 160.3, 143.3, 141.0, 139.2, 135.3, 133.6, 131.0, 129.5, 129.2, 129.0, 127.8, 127.3, 125.3, 122.3, 21.5, 21.4; HRMS (ESI):  $m/z$  calcd for  $\text{C}_{22}\text{H}_{21}\text{O}_2\text{S}_2$   $[\text{M}+\text{H}]^+$ : 381.0983, found: 381.0988.

**(E)-(4-Chlorophenyl)(1-phenyl-2-tosylvinyl)sulfane (54)**

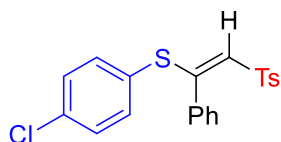

According to **General procedure 3** with phenylacetylene (20.4 mg, 0.2 mmol, 1.0 equiv.) and *S*-(4-chlorophenyl) 4-methylbenzenesulfonothioate **2h** (119.5 mg, 0.4 mmol, 2.0 equiv.) for 17 h, the reaction mixture was purified by column chromatography on silica gel (petroleum ether/ethyl acetate = 20/1) to yield the product **54** as a colorless oil (75.5 mg, 94% yield).

$^1\text{H}$  NMR (400 MHz,  $\text{CDCl}_3$ )  $\delta$ : 7.43 – 7.33 (m, 5H), 7.29 (d,  $J = 7.3$  Hz, 4H), 7.20 (d,  $J = 7.3$  Hz, 2H), 7.10 (d,  $J = 8.0$  Hz, 2H), 5.96 (s, 1H), 2.36 (s, 3H);  $^{13}\text{C}$  NMR (100 MHz,  $\text{CDCl}_3$ )  $\delta$ : 158.6, 143.6, 138.8, 136.9, 136.5, 133.2, 130.3, 129.6, 129.2, 129.0, 127.8, 127.3, 123.2, 21.5. The NMR spectra were in accord with that reported in literature.<sup>[18]</sup>

**(E)-(2-Chlorophenyl)(1-phenyl-2-tosylvinyl)sulfane (55)**

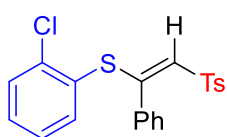

According to **General procedure 3** with phenylacetylene (20.4 mg, 0.2 mmol, 1.0 equiv.) and *S*-(2-chlorophenyl) 4-methylbenzenesulfonothioate **2i** (119.5 mg, 0.4 mmol, 2.0 equiv.) for 17 h, the reaction mixture was purified by column chromatography on silica gel (petroleum ether/ethyl acetate = 20/1) to yield the product **55** as a colorless oil (74.3 mg, 93% yield).

$^1\text{H}$  NMR (400 MHz,  $\text{CDCl}_3$ )  $\delta$ : 7.61 (dd,  $J = 7.6, 1.5$  Hz, 1H), 7.53 (dd,  $J = 8.0, 1.0$  Hz, 1H), 7.42 (td,  $J = 7.8, 1.6$  Hz, 1H), 7.34 (dd,  $J = 7.5, 1.2$  Hz, 2H), 7.28 (d,  $J = 7.7$  Hz, 5H), 7.08 (d,  $J = 8.1$  Hz, 3H), 5.87 (s, 1H), 2.36 (s, 3H);  $^{13}\text{C}$  NMR (100 MHz,  $\text{CDCl}_3$ )  $\delta$ : 156.5, 143.4, 139.3, 138.9, 137.7, 133.1, 132.2, 131.0, 129.7, 129.2, 129.1,

128.1, 127.8, 127.4, 123.3, 21.5; HRMS (ESI):  $m/z$  calcd for  $C_{21}H_{17}O_2S_2ClNa$   $[M+Na]^+$ : 423.0256, found: 423.0257.

**(E)-Methyl(1-phenyl-2-tosylvinyl)sulfane (56)**

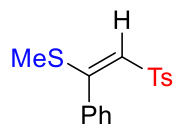

According to **General procedure 3** with phenylacetylene (20.4 mg, 0.2 mmol, 1.0 equiv.) and *S*-methyl 4-methylbenzenesulfonothioate **2j** (119.5 mg, 0.4 mmol, 2.0 equiv.) for 17 h, the reaction mixture was purified by column chromatography on silica gel (petroleum ether/ethyl acetate = 20/1) to yield the product **56** as a colorless oil (31.8 mg, 52% yield).

$^1H$  NMR (400 MHz,  $CDCl_3$ )  $\delta$ : 7.36 (t,  $J = 8.2$  Hz, 3H), 7.28 (t,  $J = 6.8$  Hz, 2H), 7.16 – 7.10 (m, 4H), 6.20 (s, 1H), 2.37 (s, 3H), 2.32 (s, 3H);  $^{13}C$  NMR (100 MHz,  $CDCl_3$ )  $\delta$ : 159.2, 143.5, 139.2, 134.2, 129.4, 129.2, 128.8, 127.8, 127.4, 120.8, 21.5, 16.3; HRMS (ESI):  $m/z$  calcd for  $C_{16}H_{16}O_2S_2Na$   $[M+Na]^+$ : 327.0489, found: 327.0488

**(8S,9R,13R,14R)-13-Methyl-3-((E)-1-(phenylthio)-2-tosylvinyl)-6,7,8,9,11,12,13,14,15,16-decahydro-17H-cyclopenta[a]phenanthren-17-one (57)**

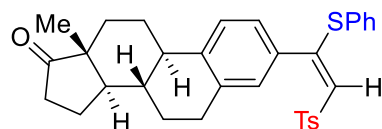

According to **General procedure 3** with (8*S*,9*R*,13*R*,14*R*)-3-ethynyl-13-methyl-6,7,8,9,11,12,13,14,15,16-decahydro-17*H*-cyclopenta[*a*]phenanthren-17-one **S57** (55.6 mg, 0.2 mmol, 1.0 equiv.) and *S*-phenyl 4-methylbenzenesulfonothioate **2a** (105.8 mg, 0.4 mmol, 2.0 equiv.) for 72 h, the reaction mixture was purified by column chromatography on silica gel (petroleum ether/ethyl acetate = 10/1) to yield the product **57** as a colorless oil (62.0 mg, 57% yield).

$^1H$  NMR (600 MHz,  $CDCl_3$ )  $\delta$ : 7.53 (dd,  $J = 7.5, 1.6$  Hz, 2H), 7.46 (d,  $J = 5.9$  Hz, 3H), 7.33 – 7.29 (m, 2H), 7.23 (d,  $J = 8.0$  Hz, 1H), 7.09 (dd,  $J = 18.4, 7.9$  Hz, 3H), 6.87 (s, 1H), 5.85 (s, 1H), 2.82 (dd,  $J = 9.0, 6.2$  Hz, 2H), 2.53 (dd,  $J = 18.9, 8.8$  Hz, 1H), 2.45 – 2.41 (m, 1H), 2.38 (s, 3H), 2.32 (t,  $J = 8.8$  Hz, 1H), 2.18 (td,  $J = 18.5, 8.5$  Hz, 2H), 2.10 (dd,  $J = 11.9, 5.3$  Hz, 1H), 2.06 – 1.97 (m, 3H), 1.64 (d,  $J = 11.8$  Hz, 1H), 1.56 –

1.52 (m, 2H), 1.47 – 1.42 (m, 1H), 0.95 (s, 3H); <sup>13</sup>C NMR (150 MHz, CDCl<sub>3</sub>) δ: 159.7, 143.2, 141.4, 139.3, 136.0, 135.4, 131.1, 130.5, 130.2, 129.3, 129.0, 127.4, 126.4, 124.9, 122.0, 50.5, 47.9, 44.5, 38.0, 35.8, 31.6, 29.7, 29.2, 26.4, 25.6, 21.6, 21.5, 13.9; HRMS (ESI): *m/z* calcd for C<sub>33</sub>H<sub>34</sub>O<sub>3</sub>S<sub>2</sub>Na [M+Na]<sup>+</sup>: 565.1847, found: 565.1849.

**(8*S*,9*R*,13*R*,14*R*)-13-Methyl-3-((*E*)-1-(phenylselanyl)-2-tosylvinyl)-6,7,8,9,11,12,13,14,15,16-decahydro-17*H*-cyclopenta[*a*]phenanthren-17-one (58)**

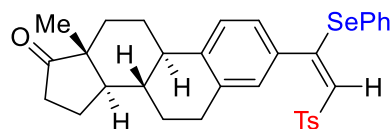

According to **General procedure 3** with (8*S*,9*R*,13*R*,14*R*)-3-ethynyl-13-methyl-6,7,8,9,11,12,13,14,15,16-decahydro-17*H*-cyclopenta[*a*]phenanthren-17-one **S57** (55.6 mg, 0.2 mmol, 1.0 equiv.) and Se-phenyl 4-methylbenzenesulfonoselenoate **2f** (124.6 mg, 0.4 mmol, 2.0 equiv.) for 17 h, the reaction mixture was purified by column chromatography on silica gel (petroleum ether/ethyl acetate = 10/1) to yield the product **58** as a colorless oil (56.4 mg, 48% yield).

<sup>1</sup>H NMR (600 MHz, CDCl<sub>3</sub>) δ: 7.60 (d, *J* = 7.2 Hz, 2H), 7.42 (dt, *J* = 14.7, 7.2 Hz, 3H), 7.33 (d, *J* = 8.1 Hz, 2H), 7.20 (d, *J* = 8.0 Hz, 1H), 7.10 (d, *J* = 7.9 Hz, 2H), 7.03 (d, *J* = 7.8 Hz, 1H), 6.84 (s, 1H), 6.05 (s, 1H), 2.82 – 2.78 (m, 2H), 2.55 – 2.50 (m, 1H), 2.37 (s, 3H), 2.30 (s, 1H), 2.20 – 2.13 (m, 1H), 2.11 – 2.06 (m, 1H), 2.04 – 1.99 (m, 2H), 1.63 (dd, *J* = 12.4, 10.2 Hz, 4H), 1.56 – 1.51 (m, 3H), 1.47 – 1.41 (m, 1H), 0.95 (s, 3H); <sup>13</sup>C NMR (150 MHz, CDCl<sub>3</sub>) δ: 157.4, 143.3, 141.2, 139.0, 136.6, 136.0, 132.1, 130.2, 130.1, 129.1, 128.7, 127.4, 127.0, 125.9, 125.2, 124.9, 50.5, 47.9, 44.5, 38.0, 35.8, 31.6, 29.2, 26.4, 25.6, 21.6, 21.6, 13.9; HRMS (ESI): *m/z* calcd for C<sub>33</sub>H<sub>34</sub>O<sub>3</sub>SSeNa [M+Na]<sup>+</sup>: 613.1292, found: 613.1291.

**Methyl(*S*,*E*)-2-((*tert*-butoxycarbonyl)amino)-3-(4-(1-(phenylthio)-2-tosylvinyl)phenyl)propanoate (59)**

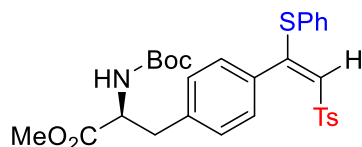

According to **General procedure 3** with methyl (*S*)-2-((*tert*-butoxycarbonyl)amino)-3-(4-ethynylphenyl)propanoate **S59** (60.8 mg, 0.2



mmol, 1.0 equiv.) and *S*-phenyl 4-methylbenzenesulfonothioate **2a** (105.6 mg, 0.4 mmol, 2.0 equiv.) for 72 h, the reaction mixture was purified by column chromatography on silica gel (petroleum ether/ethyl acetate = 10/1) to yield the product **59** as a colorless oil (60.1 mg, 53% yield).

<sup>1</sup>H NMR (600 MHz, CDCl<sub>3</sub>) δ: 7.50 (d, *J* = 6.3 Hz, 2H), 7.47 – 7.42 (m, 3H), 7.27 (s, 2H), 7.18 – 7.13 (m, 4H), 7.07 (d, *J* = 7.7 Hz, 2H), 5.94 (s, 1H), 5.02 (d, *J* = 8.0 Hz, 1H), 4.61 (dd, *J* = 13.4, 6.2 Hz, 1H), 3.74 (s, 3H), 3.15 – 3.06 (m, 2H), 2.39 (s, 3H), 1.45 (s, 9H); <sup>13</sup>C NMR (150 MHz, CDCl<sub>3</sub>) δ: 172.1, 159.4, 155.1, 143.5, 139.1, 137.8, 135.3, 132.2, 130.5, 130.1, 129.3, 129.2, 128.8, 128.7, 127.3, 122.7, 80.2, 54.3, 52.3, 38.2, 28.3, 21.5; HRMS (ESI): *m/z* calcd for C<sub>30</sub>H<sub>33</sub>NO<sub>6</sub>S<sub>2</sub>Na [M+Na]<sup>+</sup>: 590.1647, found: 590.1644.

**(1*S*,2*R*,4*S*)-1,7,7-Trimethylbicyclo[2.2.1]heptan-2-yl(*E*)-5-(phenylthio)-6-tosylhex-5-enoate (60)**

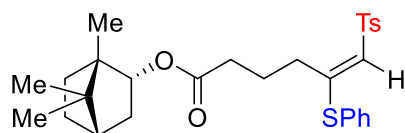

According to **General procedure 3** with methyl (1*S*,2*R*,4*S*)-1,7,7-trimethylbicyclo[2.2.1]heptan-2-yl hex-5-ynoate **S60** (53.2 mg, 0.2 mmol, 1.0 equiv.) and *S*-phenyl 4-methylbenzenesulfonothioate **2a** (105.8 mg, 0.4 mmol, 2.0 equiv.) for 72 h, the reaction mixture was purified by column chromatography on silica gel (petroleum ether/ethyl acetate = 10/1) to yield the product **60** as a colorless oil (74.6 mg, 74% yield).

<sup>1</sup>H NMR (600 MHz, CDCl<sub>3</sub>) δ: 7.59 (d, *J* = 8.3 Hz, 2H), 7.35 (s, 5H), 7.23 – 7.19 (m, 2H), 5.49 (s, 1H), 4.84 (ddd, *J* = 9.9, 3.2, 2.1 Hz, 1H), 2.81 – 2.75 (m, 2H), 2.37 – 2.33 (m, 5H), 1.95 – 1.89 (m, 3H), 1.68 (d, *J* = 3.5 Hz, 1H), 1.61 (t, *J* = 4.4 Hz, 1H), 1.55 (d, *J* = 6.3 Hz, 1H), 1.26 (dd, *J* = 8.4, 6.3 Hz, 1H), 0.92 (dd, *J* = 13.7, 3.4 Hz, 1H), 0.84 (s, 3H), 0.81 (s, 3H), 0.78 (s, 3H); <sup>13</sup>C NMR (150 MHz, CDCl<sub>3</sub>) δ: 173.2, 161.8, 143.8, 139.7, 135.5, 130.4, 130.1, 129.8, 128.3, 126.8, 120.2, 80.0, 48.7, 47.8, 44.9, 36.8, 33.9, 31.4, 28.0, 27.1, 25.1, 21.6, 19.7, 18.8, 13.6; HRMS (ESI): *m/z* calcd for C<sub>29</sub>H<sub>36</sub>O<sub>4</sub>S<sub>2</sub>Na [M+Na]<sup>+</sup>: 535.1953, found: 535.1951.

**(1*S*,2*R*,4*S*)-1,7,7-Trimethylbicyclo[2.2.1]heptan-2-yl(*E*)-5-(phenylselanyl)-6-tosyl**

### hex-5-enoate (61)

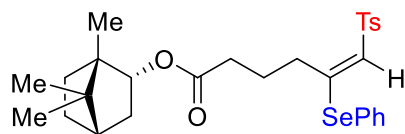

According to **General procedure 3** with methyl (1*S*,2*R*,4*S*)-1,7,7-trimethylbicyclo[2.2.1]heptan-2-yl hex-5-ynoate **S60** (53.2 mg, 0.2 mmol, 1.0 equiv.) and *Se*-phenyl 4-methylbenzenesulfonoselenoate **2f** (124.7 mg, 0.4 mmol, 2.0 equiv.) for 17 h, the reaction mixture was purified by column chromatography on silica gel (petroleum ether/ethyl acetate = 10/1) to yield the product **61** as a colorless oil (82.4 mg, 74% yield).

<sup>1</sup>H NMR (600 MHz, CDCl<sub>3</sub>)  $\delta$ : 7.66 (d,  $J = 8.2$  Hz, 2H), 7.51 (d,  $J = 7.9$  Hz, 2H), 7.42 (dd,  $J = 10.6, 4.2$  Hz, 1H), 7.36 (dd,  $J = 10.6, 4.5$  Hz, 2H), 7.29 (d,  $J = 8.0$  Hz, 2H), 5.86 (s, 1H), 4.90 (dd,  $J = 9.9, 1.9$  Hz, 1H), 2.93 – 2.88 (m, 2H), 2.41 (s, 3H), 2.39 (d,  $J = 7.7$  Hz, 2H), 1.99 – 1.93 (m, 3H), 1.77 – 1.73 (m, 1H), 1.34 – 1.27 (m, 2H), 0.99 (d,  $J = 3.2$  Hz, 1H), 0.97 (d,  $J = 3.4$  Hz, 1H), 0.90 (s, 3H), 0.87 (s, 3H), 0.84 (s, 3H); <sup>13</sup>C NMR (150 MHz, CDCl<sub>3</sub>)  $\delta$ : 173.1, 159.9, 143.9, 139.3, 136.7, 130.1, 130.0, 129.8, 126.9, 125.7, 124.3, 79.9, 48.7, 47.8, 44.8, 36.8, 33.8, 32.3, 28.0, 27.1, 25.3, 21.6, 19.7, 18.8, 13.5; HRMS (ESI):  $m/z$  calcd for C<sub>29</sub>H<sub>36</sub>O<sub>4</sub>SSeNa [M+Na]<sup>+</sup>: 583.1397, found: 583.1392.

### (*R,E*)-*N*-Methyl-*N*-(3-phenyl-3-(*o*-tolylxy)propyl)-5-(phenylthio)-6-tosylhex-5-enamide (62)

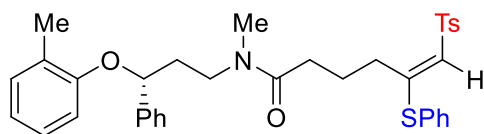

According to **General procedure 3** with methyl (*R*)-*N*-methyl-*N*-(3-phenyl-3-(*o*-tolylxy)propyl)hex-5-ynamide **S62** (69.8 mg, 0.2 mmol, 1.0 equiv.) and *S*-phenyl 4-methylbenzenesulfonothioate **2a** (105.8 mg, 0.4 mmol, 2.0 equiv.) for 72 h, the reaction mixture was purified by column chromatography on silica gel (petroleum ether/ethyl acetate = 10/1) to yield the product **62** as a colorless oil (84.9 mg, 69% yield).

<sup>1</sup>H NMR (600 MHz, CDCl<sub>3</sub>)  $\delta$ : 7.63 (dd,  $J = 8.2, 3.4$  Hz, 2H), 7.44 – 7.37 (m, 5H), 7.32 (dt,  $J = 15.2, 7.9$  Hz, 5H), 7.25 (d,  $J = 2.8$  Hz, 2H), 7.22 (t,  $J = 7.3$  Hz, 1H), 7.12

(dd,  $J = 12.7, 7.3$  Hz, 1H), 6.96 – 6.92 (m, 1H), 6.77 (dt,  $J = 14.7, 7.3$  Hz, 1H), 6.58 (t,  $J = 8.4$  Hz, 1H), 5.52 (d,  $J = 13.5$  Hz, 1H), 5.22 – 5.17 (m, 1H), 3.66 – 3.50 (m, 2H), 2.96 (d,  $J = 16.1$  Hz, 3H), 2.89 – 2.75 (m, 2H), 2.39 (d,  $J = 3.0$  Hz, 3H), 2.35 (d,  $J = 8.5$  Hz, 3H), 2.28 – 2.09 (m, 3H), 2.06 – 1.92 (m, 2H);  $^{13}\text{C}$  NMR (150 MHz,  $\text{CDCl}_3$ )  $\delta$ : 171.96, 171.91, 162.3, 155.7, 155.4, 143.8, 143.7, 141.6, 141.0, 139.7, 139.6, 135.5, 130.7, 130.6, 130.30, 130.27, 130.01, 129.99, 129.71, 129.70, 128.8, 128.5, 128.4, 128.3, 127.7, 127.5, 126.9, 126.71, 126.69, 126.67, 126.6, 126.5, 125.7, 125.5, 120.5, 120.2, 119.8, 119.7, 112.7, 112.5, 77.5, 76.5, 46.5, 45.4, 37.6, 36.5, 35.8, 33.4, 32.8, 32.1, 31.41, 31.39, 25.4, 25.1, 21.5, 16.6, 16.5; HRMS (ESI):  $m/z$  calcd for  $\text{C}_{36}\text{H}_{39}\text{NO}_4\text{S}_2\text{Na} [\text{M}+\text{Na}]^+$ : 636.2218, found: 636.2216.

**(*R,E*)-*N*-Methyl-*N*-(3-phenyl-3-(*o*-tolylloxy)propyl)-5-(phenylselenanyl)-6-tosylhex-5-enamide (63)**

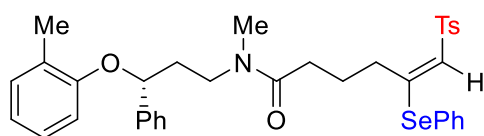

According to **General procedure 3** with methyl (*R*)-*N*-methyl-*N*-(3-phenyl-3-(*o*-tolylloxy)propyl)hex-5-ynamide **S62** (69.8 mg, 0.2 mmol, 1.0 equiv.) and *Se*-phenyl 4-methylbenzenesulfonoselenoate **2f** (105.8 mg, 0.4 mmol, 2.0 equiv.) for 17 h, the reaction mixture was purified by column chromatography on silica gel (petroleum ether/ethyl acetate = 10/1) to yield the product **63** as a colorless oil (118.5 mg, 90% yield).

$^1\text{H}$  NMR (600 MHz,  $\text{CDCl}_3$ )  $\delta$ : 7.63 (dd,  $J = 8.0, 4.1$  Hz, 2H), 7.49 (t,  $J = 8.6$  Hz, 2H), 7.39 (dd,  $J = 6.7, 4.2$  Hz, 1H), 7.36 – 7.27 (m, 7H), 7.25 – 7.21 (m, 2H), 7.11 (dd,  $J = 11.7, 7.5$  Hz, 1H), 6.93 (d,  $J = 7.6$  Hz, 1H), 6.77 (dt,  $J = 14.3, 7.3$  Hz, 1H), 6.58 (t,  $J = 9.1$  Hz, 1H), 5.82 (d,  $J = 17.4$  Hz, 1H), 5.19 (dd,  $J = 8.6, 4.9$  Hz, 1H), 3.57 (dddd,  $J = 26.6, 18.1, 9.7, 4.7$  Hz, 2H), 2.95 (d,  $J = 12.8$  Hz, 3H), 2.92 – 2.83 (m, 2H), 2.39 (s, 3H), 2.35 (s, 3H), 2.34 (s, 3H), 2.21 – 2.16 (m, 1H), 2.02 – 1.96 (m, 1H), 1.95 – 1.89 (m, 1H), 1.76 (s, 1H);  $^{13}\text{C}$  NMR (150 MHz,  $\text{CDCl}_3$ )  $\delta$ : 172.0, 171.9, 160.5, 160.5, 155.7, 155.4, 143.88, 143.85, 141.6, 141.0, 139.33, 139.29, 136.66, 136.65, 131.4, 130.7, 130.6, 130.3, 130.0, 129.87, 129.85, 129.76, 129.75, 128.8, 128.5, 127.9, 127.8, 127.5, 126.9, 126.86, 126.82, 126.68, 126.66, 126.6, 125.9, 125.8, 125.7, 125.6, 123.9,

123.8, 120.5, 120.2, 112.7, 112.5, 77.5, 76.5; HRMS (ESI):  $m/z$  calcd for  $C_{36}H_{39}NO_4SSeNa$   $[M+Na]^+$ : 684.1663, found: 684.1668.

**((3a*R*,5a*S*,8a*S*)-2,2,7,7-Tetramethyltetrahydro-3a*H*-bis([1,3]dioxolo)[4,5-*b*:4',5'-d]pyran-3a-yl)methyl (*E*)-5-(phenylselanyl)-6-tosylhex-5-enoate (**64**)**

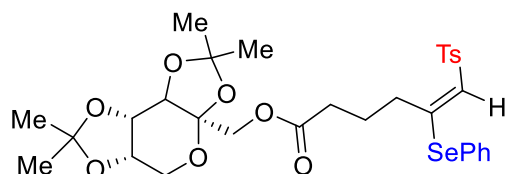

According to **General procedure 3** with methyl ((3a*R*,5a*S*,8a*S*)-2,2,7,7-tetramethyltetrahydro-3a*H*-bis([1,3]dioxolo)[4,5-*b*:4',5'-d]pyran-3a-yl)methyl hex-5-ynoate **S64** (70.8 mg, 0.2 mmol, 1.0 equiv.) and *Se*-phenyl 4-methylbenzenesulfonoselenoate **2f** (124.6 mg, 0.4 mmol, 2.0 equiv.) for 17 h, the reaction mixture was purified by column chromatography on silica gel (petroleum ether/ethyl acetate = 10/1) to yield the product **64** as a colorless oil (38.6 mg, 30% yield).

$^1H$  NMR (600 MHz,  $CDCl_3$ )  $\delta$ : 7.65 (d,  $J = 8.1$  Hz, 2H), 7.51 (d,  $J = 7.8$  Hz, 2H), 7.43 (dd,  $J = 10.6, 4.1$  Hz, 1H), 7.37 (t,  $J = 7.5$  Hz, 2H), 7.29 (d,  $J = 8.0$  Hz, 2H), 5.86 (s, 1H), 4.61 (dd,  $J = 7.9, 2.4$  Hz, 1H), 4.43 (d,  $J = 11.7$  Hz, 1H), 4.33 (d,  $J = 2.5$  Hz, 1H), 4.25 (d,  $J = 8.0$  Hz, 1H), 4.06 (d,  $J = 11.7$  Hz, 1H), 3.92 (d,  $J = 13.0$  Hz, 1H), 3.77 (d,  $J = 13.0$  Hz, 1H), 2.92 – 2.87 (m, 2H), 2.45 (t,  $J = 7.5$  Hz, 2H), 2.42 (s, 3H), 1.98 (dt,  $J = 15.2, 7.6$  Hz, 2H), 1.55 (s, 3H), 1.49 (s, 3H), 1.42 (s, 3H), 1.35 (s, 3H);  $^{13}C$  NMR (150 MHz,  $CDCl_3$ )  $\delta$ : 172.1, 159.6, 144.0, 139.3, 136.7, 130.1, 130.0, 129.8, 126.9, 125.8, 124.4, 109.2, 108.8, 101.6, 70.8, 70.5, 70.1, 65.3, 61.3, 33.3, 32.2, 26.5, 26.0, 25.3, 25.0, 24.1, 21.6; HRMS (ESI):  $m/z$  calcd for  $C_{31}H_{38}O_9SSeNa$   $[M+Na]^+$ : 689.1299, found: 689.1302.

## 7. Synthetic application

### a) Large-scale synthesis

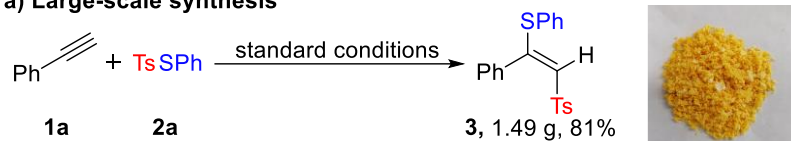

### b) Synthetic transformation

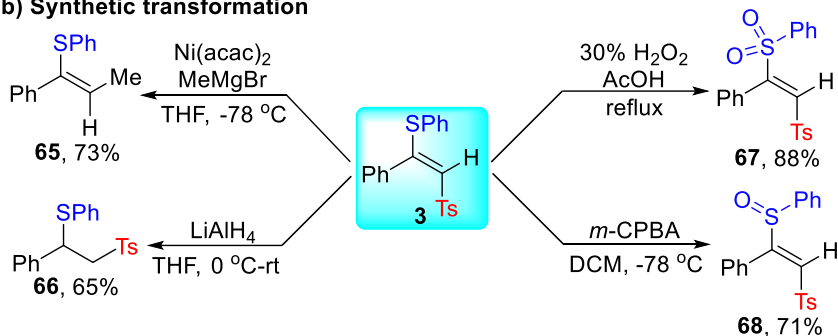

According to **General procedure 3** with phenylacetylene **1a** (510.6 mg, 5.0 mmol, 1.0 equiv.) and *S*-phenyl 4-methylbenzenesulfonothioate **2a** (2.6 g, 10 mmol, 2.0 equiv.) for 17 h. After completion, the reaction mixture was centrifuged to separate g-C<sub>3</sub>N<sub>4</sub> and the liquid mixture. Then, the product **3** was isolated by flash chromatography (petroleum ether/ethyl acetate = 20/1) as a yellow solid (1.49 g, 81% yield).

### (*Z*)-Phenyl(1-phenylprop-1-en-1-yl)sulfane (**65**)

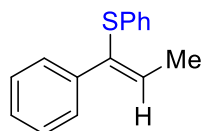

(*E*)-Phenyl(1-phenyl-2-tosylvinyl) sulfane **3** (73.3 mg, 0.2 mmol, 1.0 equiv.) and Ni(acac)<sub>2</sub> (5 mg, 0.02 mmol, 10 mol%) were sparged with Ar for 5 minutes. Dry THF (6 mL 33 mM) was added and the mixture was cooled down to -78 °C. Then, methyl magnesium bromide (0.2 mL, [3M] in Et<sub>2</sub>O, 3 equiv.) was added slowly to the mixture, and the reaction was stirred at room temperature for 2 h. Next, the reaction mixture was quenched with NH<sub>4</sub>Cl and extracted with ethyl acetate (3 x 20 mL). The combined organic layers were dried with over Na<sub>2</sub>SO<sub>4</sub> and concentrated in vacuo. The reaction mixture was purified by column chromatography on silica gel (petroleum ether) to yield the product **65** as a colorless oil (45.3 mg, 73% yield).<sup>[19]</sup>

<sup>1</sup>H NMR (600 MHz, CDCl<sub>3</sub>) δ: 7.49 – 7.46 (m, 2H), 7.16 (dd, *J* = 12.1, 4.8 Hz, 2H), 7.08 (ddt, *J* = 17.0, 15.3, 7.7 Hz, 5H), 6.97 – 6.94 (m, 1H), 6.45 (q, *J* = 6.8 Hz, 1H),

2.01 (d,  $J = 6.8$  Hz, 3H);  $^{13}\text{C}$  NMR (150 MHz,  $\text{CDCl}_3$ )  $\delta$ : 140.6, 136.0, 134.6, 134.2, 128.7, 128.1, 127.9, 127.4, 127.3, 125.3, 16.9. The NMR spectra were in accord with that reported in literature.<sup>[20]</sup>

**Phenyl(1-phenyl-2-tosylethyl)sulfane (66)**

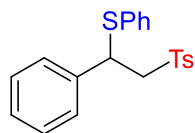

To a solution of (*E*)-phenyl(1-phenyl-2-tosylvinyl) sulfane **3** (73.3mg, 0.2 mmol, 1.0 equiv.) in THF (1 mL) at 0 °C was added a solution of 2.5 M Lithium aluminium hydride solution (0.1 mL, 0.3 mmol, 1.5 equiv.) dropwise. The resulting solution was stirred at rt for 2 h. Upon completion (monitored by TLC), the reaction mixture was quenched with 1 M HCl solution at 0 °C and extracted with ethyl acetate (3 x 20 mL). The combined organic layers were dried with over  $\text{Na}_2\text{SO}_4$  and concentrated in vacuo. The residue was purified by flash column chromatography on silica gel (petroleum ether) to yield the product **66** as a colorless oil (47.9 mg, 65% yield).

$^1\text{H}$  NMR (600 MHz, DMSO- $d_6$ )  $\delta$ : 7.53 (d,  $J = 7.5$  Hz, 2H), 7.47 – 7.45 (m, 2H), 7.38 (t,  $J = 7.7$  Hz, 2H), 7.29 (dd,  $J = 9.4, 6.2$  Hz, 2H), 7.19 – 7.12 (m, 5H), 7.05 (ddd,  $J = 7.0, 6.1, 2.1$  Hz, 1H), 2.06 (d,  $J = 5.6$  Hz, 1H), 1.94 (d,  $J = 5.6$  Hz, 1H), 0.99 (s, 3H);  $^{13}\text{C}$  NMR (150 MHz, DMSO- $d_6$ )  $\delta$ : 143.5, 141.1, 136.5, 130.3, 129.1, 129.0, 128.8, 128.34, 127.0, 126.2, 33.8, 26.6, 25.8.

**(*E*)-1-Methyl-4-((2-phenyl-2-(phenylsulfonyl) vinyl)sulfonyl) benzene (67)**

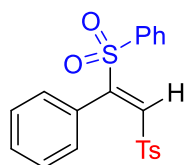

(*E*)-Phenyl(1-phenyl-2-tosylvinyl) sulfane **3** (73.2 mg, 0.2 mmol, 1.0 equiv.) in glacial acetic acid (1.0 mL) were sequentially added to an oven-dried flask equipped with a magnetic stir bar under argon atmosphere with a reflux condenser. The mixture was heated to reflux, and 30% hydrogen peroxide (5 mL) was added slowly. The solution was refluxed for 1 h. After the completion of reaction, the reaction mixture was diluted with water, washed by saturated aq.  $\text{Na}_2\text{CO}_3$  (10 mL), and extracted with ethyl acetate (3 x 20 mL). The combined organic layers were dried with over  $\text{Na}_2\text{SO}_4$  and

concentrated in vacuo. The reaction mixture was purified by column chromatography on silica gel (petroleum ether/ethyl acetate = 20/1) to yield the product **67** as a colorless oil (70.1 mg, 88% yield).<sup>[21]</sup>

<sup>1</sup>H NMR (600 MHz, CDCl<sub>3</sub>)  $\delta$ : 7.77 (s, 1H), 7.58 (t,  $J$  = 7.4 Hz, 1H), 7.51 – 7.48 (m, 2H), 7.45 (d,  $J$  = 8.2 Hz, 2H), 7.40 (t,  $J$  = 7.8 Hz, 2H), 7.35 (t,  $J$  = 7.5 Hz, 1H), 7.22 – 7.17 (m, 4H), 6.91 (d,  $J$  = 7.9 Hz, 2H), 2.41 (s, 3H); <sup>13</sup>C NMR (100 MHz, CDCl<sub>3</sub>)  $\delta$ : 152.5, 145.4, 137.9, 134.4, 130.2, 130.1, 129.8, 129.1, 129.0, 128.2, 127.7, 126.9, 21.7; HRMS (ESI):  $m/z$  calcd for C<sub>21</sub>H<sub>18</sub>O<sub>4</sub>S<sub>2</sub>Na [M+Na]<sup>+</sup>: 421.0544, found: 421.0543.

**(E)-1-Methyl-4-((2-phenyl-2-(phenylsulfonyl) vinyl)sulfonyl)benzene (68)**

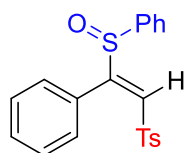

(E)-Phenyl(1-phenyl-2-tosylvinyl) sulfane **3** (36.7 mg, 0.1 mmol, 1.0 equiv.) in DCM (1.0 mL) were added to an oven-dried flask equipped with a magnetic stir bar under argon atmosphere. *m*-CPBA (17.3 mg, 0.1 mmol) in DCM (1 mL) was then added dropwise at -78 °C. The resulting mixture was allowed to warm to room temperature overnight. After the completion of reaction, the reaction mixture was washed by saturated aq. Na<sub>2</sub>CO<sub>3</sub> (10 mL), extracted with DCM (3 x 20 mL). The combined organic layers were dried with over Na<sub>2</sub>SO<sub>4</sub> and concentrated in vacuo. The reaction mixture was purified by column chromatography on silica gel (petroleum ether) to yield the product **68** as a colorless oil (27.1 mg, 71% yield).<sup>[22]</sup>

<sup>1</sup>H NMR (600 MHz, CDCl<sub>3</sub>)  $\delta$ : 7.48 (d,  $J$  = 8.2 Hz, 2H), 7.35 (t,  $J$  = 7.4 Hz, 1H), 7.30 (t,  $J$  = 7.5 Hz, 1H), 7.24 (d,  $J$  = 7.6 Hz, 2H), 7.21 – 7.14 (m, 5H), 7.12 (d,  $J$  = 8.0 Hz, 2H), 6.84 (d,  $J$  = 7.8 Hz, 2H), 2.34 (s, 3H); <sup>13</sup>C NMR (150 MHz, CDCl<sub>3</sub>)  $\delta$ : 160.5, 144.9, 140.1, 137.4, 132.0, 130.1, 129.7, 129.6, 129.2, 129.1, 128.1, 128.0, 127.9, 125.3, 21.6; HRMS (ESI):  $m/z$  calcd for C<sub>21</sub>H<sub>18</sub>O<sub>3</sub>S<sub>2</sub>Na [M+Na]<sup>+</sup>: 405.0595, found: 405.0592.

**Evaluation of g-C<sub>3</sub>N<sub>4</sub> recycling.**

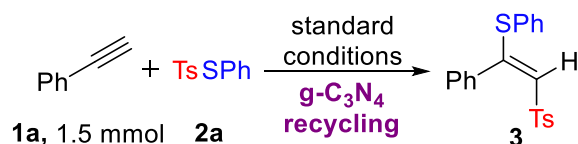

According to **General procedure 3** with phenylacetylene **1a** (153.2 mg, 1.5 mmol, 1.0 equiv.) and *S*-phenyl 4-methylbenzenesulfonothioate **2a** (793.0 mg, 3 mmol, 2.0 equiv.) for 17 h. After completion, the reaction mixture was centrifuged to separate g-C<sub>3</sub>N<sub>4</sub> and the liquid mixture. Then, the product was isolated by flash chromatography (petroleum ether/ethyl acetate = 20/1) as a yellow solid. The catalyst g-C<sub>3</sub>N<sub>4</sub> was thoroughly washed 3 times with DCM and dried in an oven at 60 °C for overnight and reused in the subsequent recycling reaction.

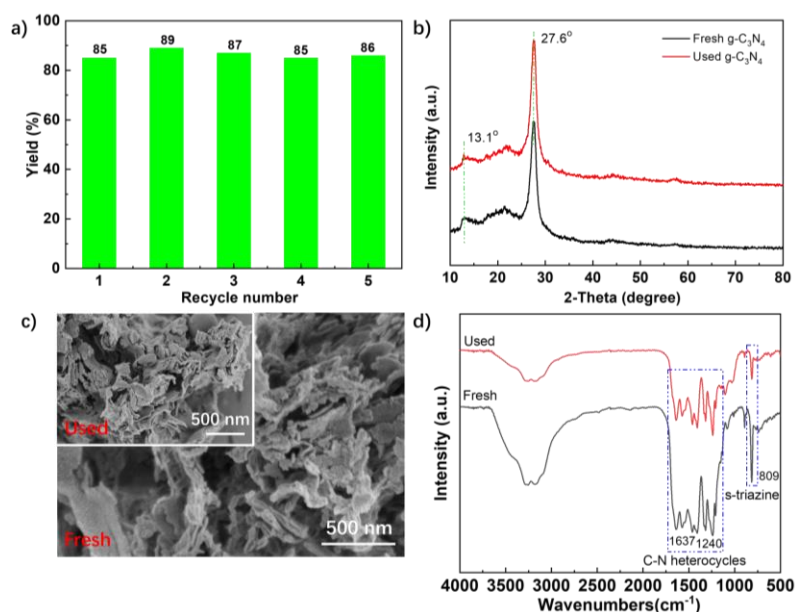

## 8. Mechanistic Studies

### 8.1 Active species trapping experiment

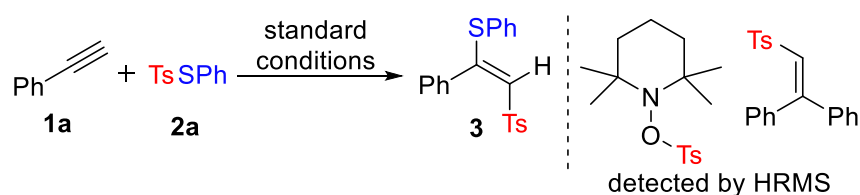

| Quencher                 | Quenching group | Yield (%) |
|--------------------------|-----------------|-----------|
| TEMPO                    | Free radicals   | 0         |
| Ethene-1,1-diyldibenzene | Free radicals   | 0         |
| HCOONH <sub>4</sub>      | Holes           | 81        |
| CCl <sub>4</sub>         | e <sup>-</sup>  | 83        |

According to **General procedure 3** with thiosulfonates **2a** (52.9 mg, 0.2 mmol, 2 equiv.), g-C<sub>3</sub>N<sub>4</sub> (5 mg) and TEMPO (31.2 mg, 0.2 mmol, 2.0 equiv.) or ethene-1,1-diyldibenzene (36.0 mg, 0.2 mmol, 2.0 equiv.) and phenylacetylene **1a** (10.2 mg, 0.1 mmol, 1.0 equiv.) for 17 h. After the completion of reaction, the reaction



mixture was filtered and the precipitate was washed by ethyl acetate and 30 mL water and extracted with ethyl acetate (3 x 20 mL). The filtrate was removed by rotary evaporator under vacuum and the residue was analyzed by HRMS. **3** was not detected in the reaction mixture.

According to **General procedure 3** with thiosulfonates **2a** (52.9 mg, 0.2 mmol, 2 equiv.), g-C<sub>3</sub>N<sub>4</sub> (5 mg) and HCOONH<sub>4</sub> (12.6 mg, 0.2 mmol, 2.0 equiv.) or CCl<sub>4</sub> (30.8 mg, 0.2 mmol, 2.0 equiv.) and phenylacetylene **1a** (10.2 mg, 0.1 mmol, 1.0 equiv.) for 17 h. After the completion of reaction, the reaction mixture was filtered and the precipitate was washed by ethyl acetate and 30 mL water and extracted with ethyl acetate (3 x 20 mL). The combined organic layers were dried with over Na<sub>2</sub>SO<sub>4</sub> and concentrated in vacuo. The residue was purified by flash column chromatography on silica gel to afford the pure product **3**.

### 2,2,6,6-Tetramethylpiperidin-1-yl 4-methylbenzenesulfonate

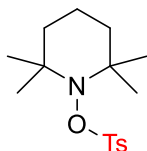

HRMS (ESI):  $m/z$  calcd for C<sub>16</sub>H<sub>25</sub>NO<sub>3</sub>SK [M+K]<sup>+</sup>: 350.1192, found: 350.1185.

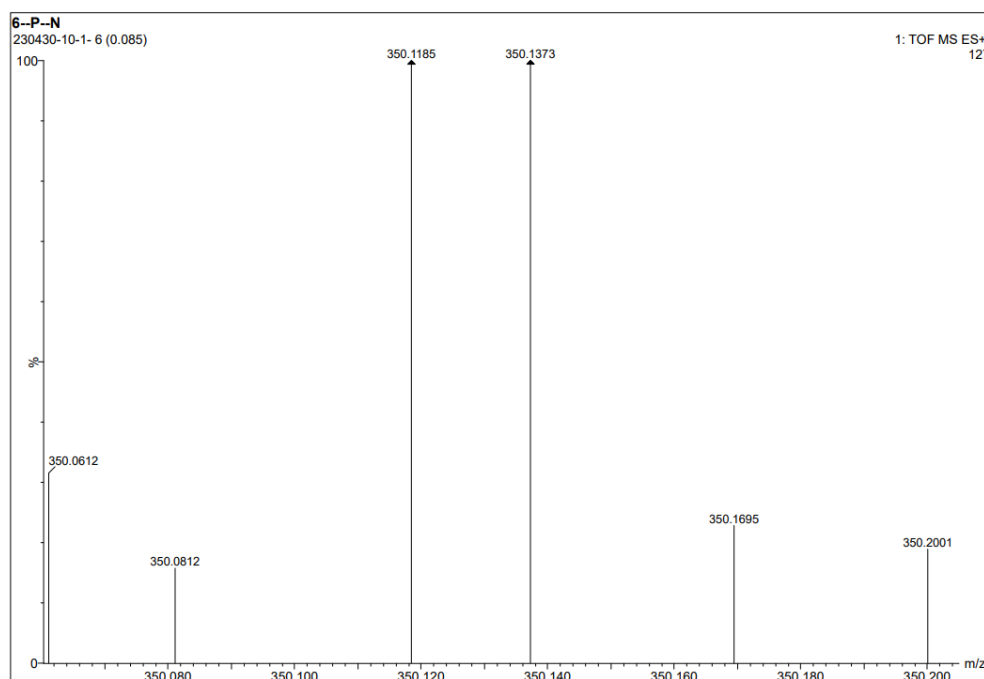

### (2-Tosylethene-1,1-diyl)dibenzene

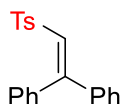

HRMS (ESI):  $m/z$  calcd for  $C_{21}H_{19}O_2S$   $[M+H]^+$ : 335.1106, found: 335.1105.

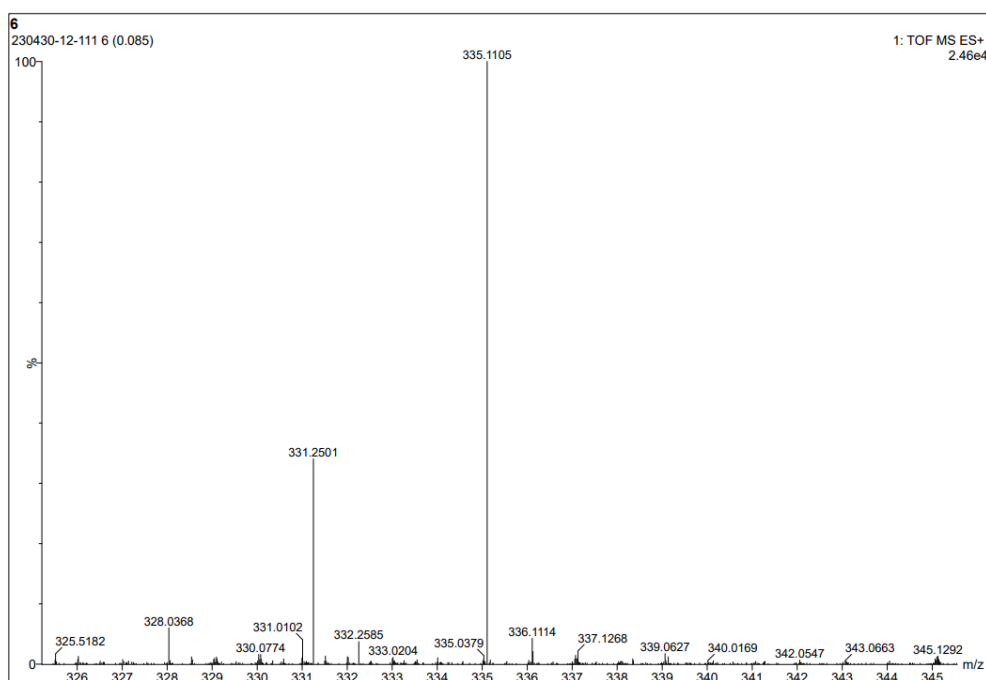

## 8.2 Radical clock experiment

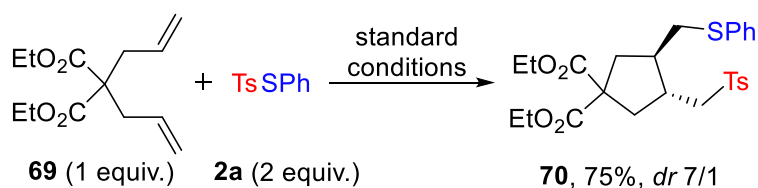

According to **General procedure 3** with thiosulfonates **2a** (52.9 mg, 0.2 mmol, 2 equiv.),  $g\text{-}C_3N_4$  (5 mg) and diethyl diallylmalonate (24 mg, 0.1 mmol 1.0 equiv.) for 17 h. Upon completion (monitored by TLC), the reaction mixture was filtered. The filtrate was transferred to a separate funnel using 20 mL ethyl acetate and 30 mL water and extracted with ethyl acetate (3 x 20 mL). The combined organic layers were dried with over  $Na_2SO_4$  and concentrated in vacuo. The residue was purified by column chromatography on silica gel (petroleum ether/ethyl acetate = 20/1) to afford the pure product as a colorless oil (37.8 mg, 75% yield).

### Diethyl(3*R*,4*R*)-3-((phenylthio)methyl)-4-(tosylmethyl)cyclopentane-1,1-dicarboxylate (**70**)

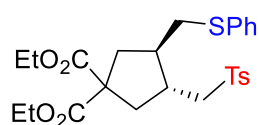

$^1\text{H}$  NMR (600 MHz,  $\text{CDCl}_3$ )  $\delta$ : 7.78 (d,  $J = 7.3$  Hz, 2H), 7.35 (d,  $J = 7.6$  Hz, 2H), 7.30 – 7.23 (m, 4H), 7.20 – 7.16 (m, 1H), 4.20 – 4.12 (m, 4H), 3.23 (dd,  $J = 13.9, 3.9$  Hz, 1H), 3.10 (dd,  $J = 13.7, 9.5$  Hz, 1H), 2.89 (dd,  $J = 12.5, 6.1$  Hz, 1H), 2.74 – 2.67 (m, 1H), 2.61 – 2.48 (m, 2H), 2.47 – 2.41 (m, 4H), 2.40 – 2.32 (m, 2H), 2.29 (dd,  $J = 13.6, 6.5$  Hz, 1H), 1.27 – 1.18 (m, 6H);  $^{13}\text{C}$  NMR (150 MHz,  $\text{CDCl}_3$ )  $\delta$ : 172.3, 171.8, 144.7, 136.4, 135.4, 129.9, 129.7, 129.5, 128.94, 128.90, 128.0, 127.9, 126.3, 61.8, 61.60, 61.55, 60.3, 58.8, 58.3, 55.8, 44.0, 41.2, 39.6, 38.9, 38.8, 38.0, 37.9, 37.5, 36.4, 34.0, 21.6, 13.92, 13.91. The NMR spectra were in accord with that reported in literature.<sup>[23]</sup>

### 8.3 Cross-over experiment

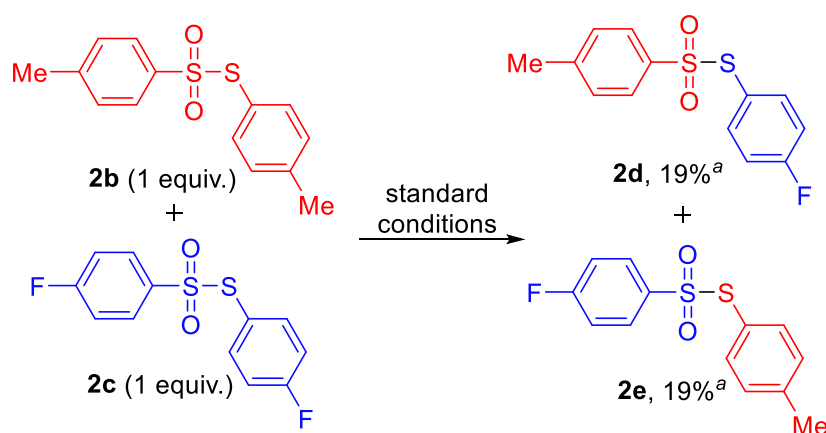

Following the **General procedure 3**, thiosulfonates **2b** (27.8 mg, 0.1 mmol, 1 equiv.), **2c** (28.6 mg, 0.1 mmol, 1 equiv.) and  $\text{g-C}_3\text{N}_4$  (5 mg) in DMSO (1 mL) were sequentially added to an oven-dried Schlenk tube equipped with a magnetic stir bar under argon atmosphere. The reaction mixture was stirred under the irradiation of a 24 W blue LED for 17 h. Upon completion (monitored by TLC), the reaction mixture was filtered. The filtrate was analyzed by  $^{19}\text{F}$  NMR with hexafluorobenzene as internal standard. **2d** and **2e** of thiosulfonates were obtained in 19 % yield.<sup>[23]</sup>

$^{19}\text{F}$  NMR (565 MHz,  $\text{CDCl}_3$ )  $\delta$ : -102.45, -103.13, -106.80, -107.43, -161.74; HRMS (ESI):  $m/z$  calcd for  $\text{C}_{13}\text{H}_{11}\text{O}_2\text{S}_2\text{FN}_a$   $[\text{M}+\text{Na}]^+$ : 305.0082, found: 305.0083.

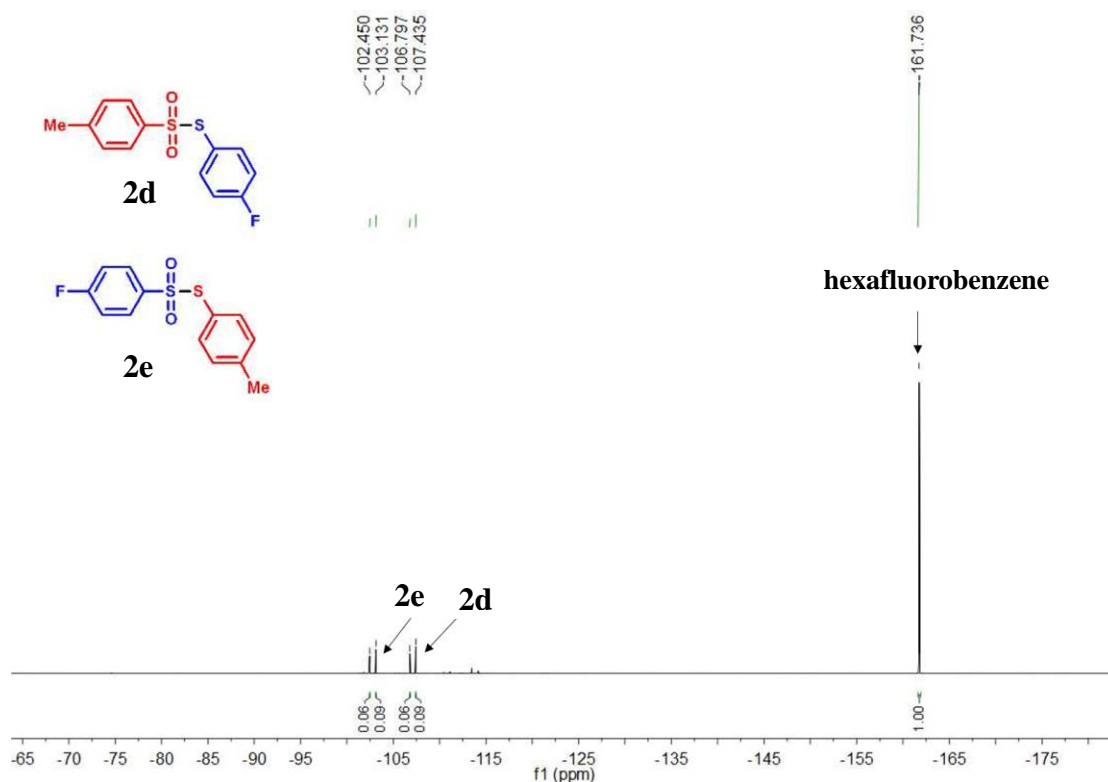

#### 8.4 Control experiment

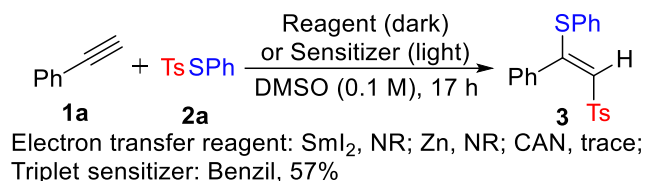

**Electron transfer reagent:** Phenylacetylene **1a** (10.2 mg, 0.1 mmol, 1.0 equiv.), thiosulfonates **2a** (52.9 mg, 0.2 mmol, 2 equiv.) and reagent (1 equiv.) were sequentially added to an oven-dried Schlenk tube equipped with a magnetic stir bar under argon atmosphere in DMSO (1 mL) at rt. The reaction was stirred for 17 h under dark.

**Triplet sensitizer:** Phenylacetylene **1a** (10.2 mg, 0.1 mmol, 1.0 equiv.), thiosulfonates **2a** (52.9 mg, 0.2 mmol, 2 equiv.) and benzil (1 equiv.) were sequentially added to an oven-dried Schlenk tube equipped with a magnetic stir bar under argon atmosphere in DMSO (1 mL) at rt under blue LED (7 W) irradiation for 17 h. The reaction mixture was purified by flash column chromatography on silica gel to afford the pure product.

#### 8.5 Deuterium labeling experiment

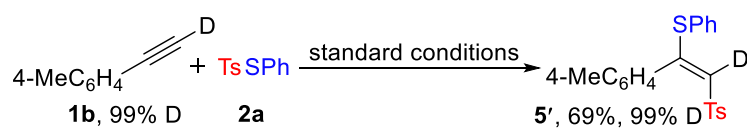

According to **General procedure 3** with thiosulfonates **2a** (52.9 mg, 0.2 mmol, 2 equiv.), g-C<sub>3</sub>N<sub>4</sub> (5 mg) and deuterated alkyne **[D]-1b** (11.7 mg, 0.1 mmol 1.0 equiv.) for 17 h. Upon completion (monitored by TLC), the reaction mixture was filtered. The filtrate was transferred to a separate funnel using 20 mL ethyl acetate and 30 mL water and extracted with ethyl acetate (3 x 20 mL). The combined organic layers were dried with over Na<sub>2</sub>SO<sub>4</sub> and concentrated in vacuo. The residue was purified by column chromatography on silica gel (petroleum ether/ethyl acetate = 20/1) to afford the pure product as a colorless oil (26.3 mg, 69% yield).

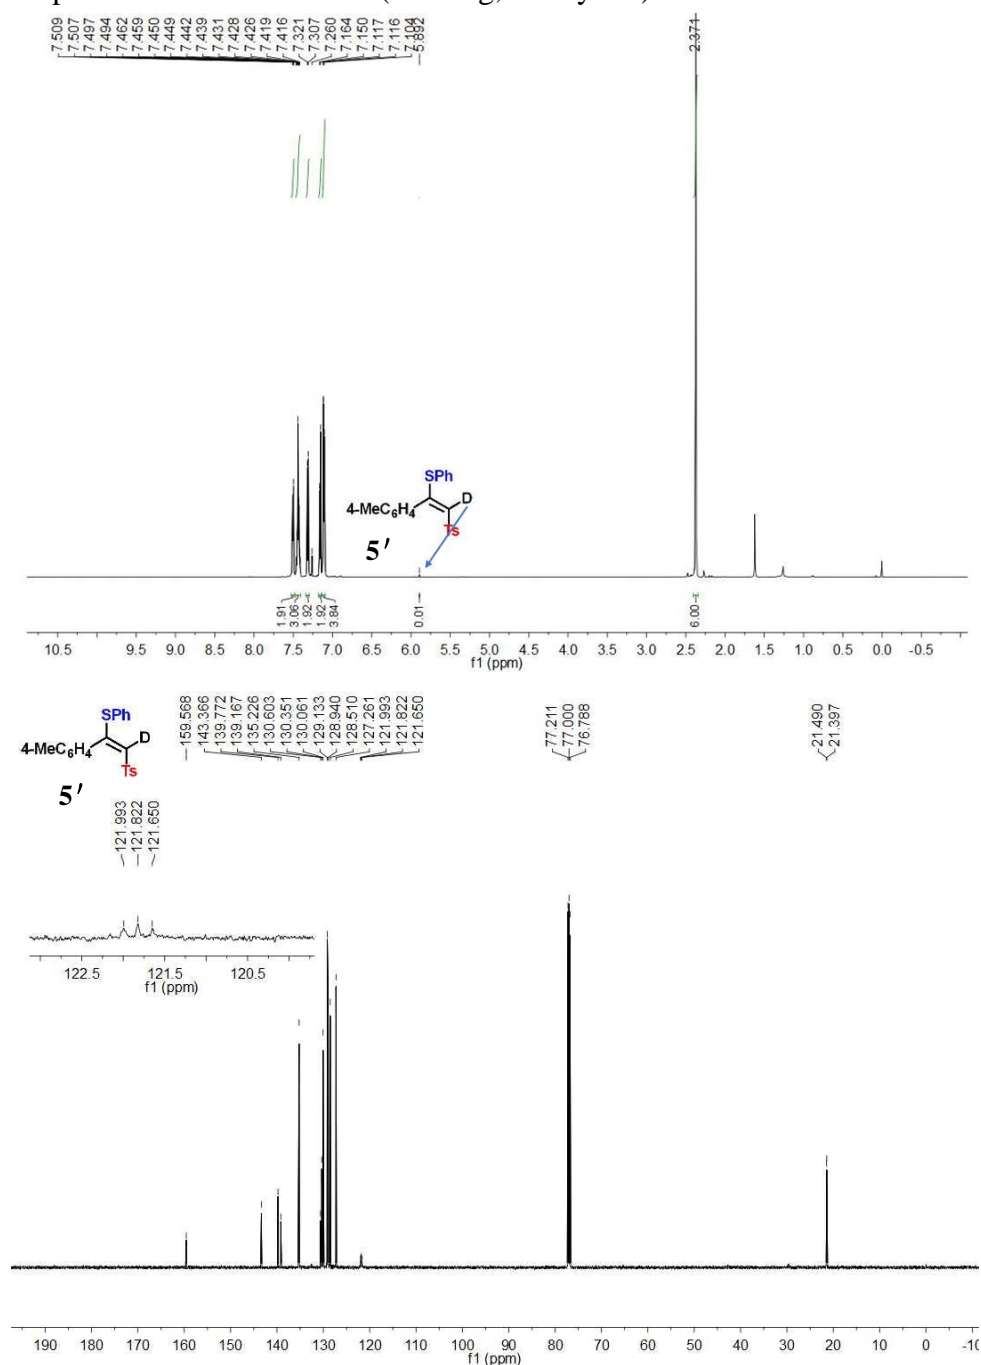

**Synthesis of deuterated alkyne [D]-1b:** a solution of 1-ethynyl-4-methylbenzene (1.00 mmol, 116.2 mg) in THF (5 mL) was treated with *n*-butyllithium 2.5 M in hexane (0.440 mL, 1.10 mmol) at -78 °C for 30 min and then warmed up to room temperature until total consumption of the starting material. Then, the reaction was quenched with D<sub>2</sub>O (100%). Diethyl ether was added and the organic layer was separated, dried over MgSO<sub>4</sub> and the solvent was removed under vacuum. The relative integrated intensities of the phenyl protons to the methylidyne protons, which had been 4.0 to 1.0 in the starting phenylacetylene, were now 4.0 to 0.01, indicating 99% deuteration at the CH group and thus a 99% yield of [D]-1b.

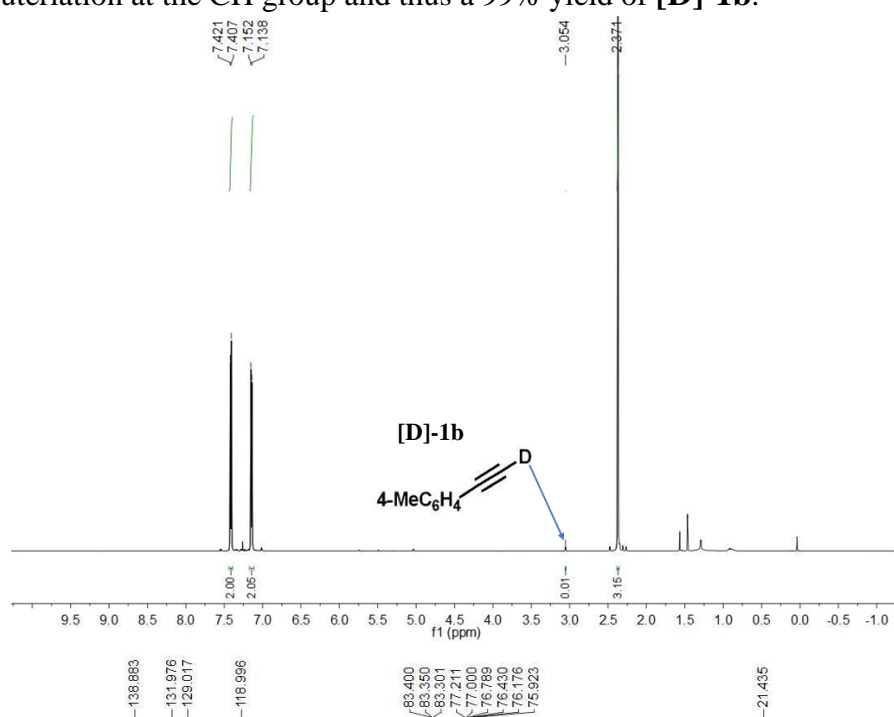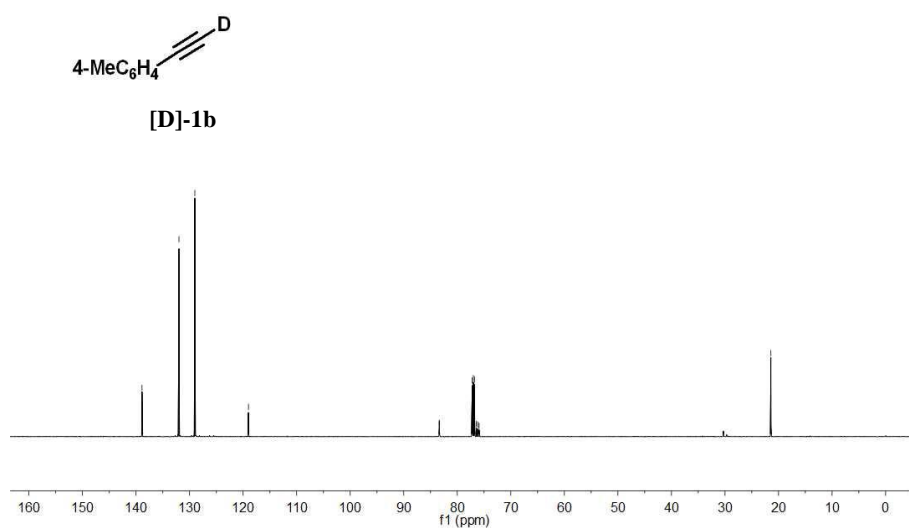

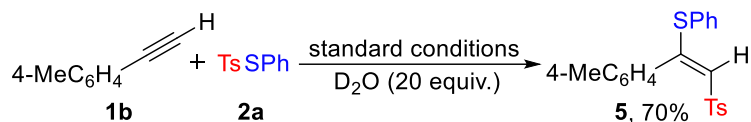

According to **General procedure 3** with thiosulfonates **2a** (52.9 mg, 0.2 mmol, 2 equiv.), g-C<sub>3</sub>N<sub>4</sub> (5 mg), alkyne **1b** (11.6 mg, 0.1 mmol 1.0 equiv.) and D<sub>2</sub>O (40.1 mg, 2 mmol, 20 equiv.) for 17 h. Upon completion (monitored by TLC), the reaction mixture was filtered. The filtrate was transferred to a separate funnel using 20 mL ethyl acetate and 30 mL water and extracted with ethyl acetate (3 x 20 mL). The combined organic layers were dried with over Na<sub>2</sub>SO<sub>4</sub> and concentrated in vacuo. The residue was purified by column chromatography on silica gel (petroleum ether/ethyl acetate = 20/1) to afford the pure product as a colorless oil (26.6 mg, 70% yield).

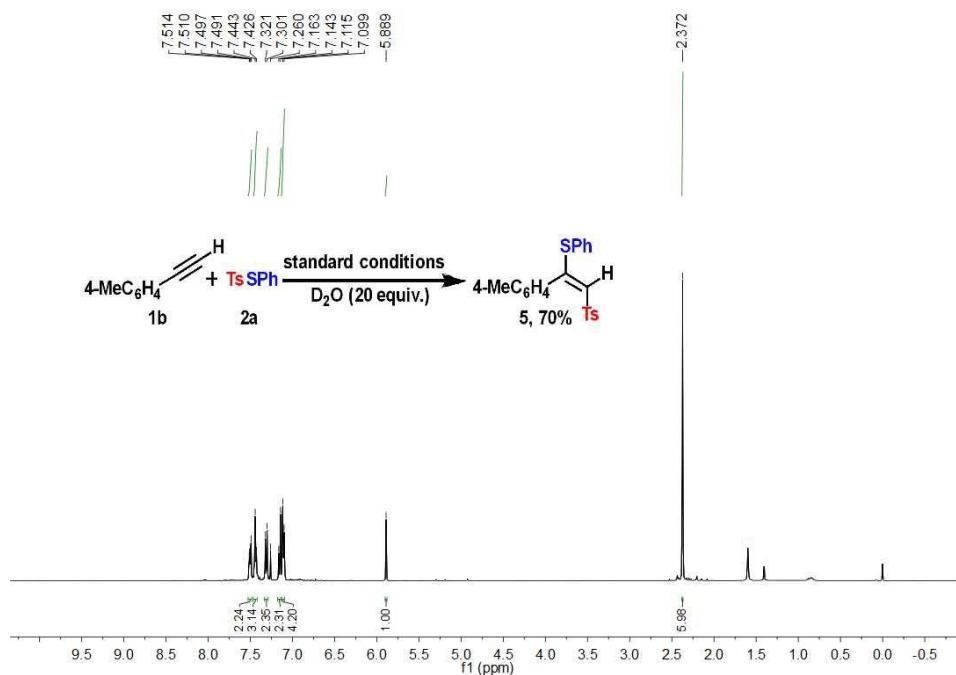

## 8.6 Quantum yield measurement

### Determination of the light intensity at 450 nm:

The photon flux of the LED ( $\lambda_{\text{max}} = 450 \text{ nm}$ ) was determined by ferrioxalate actinometry similar to a procedure by Yoon.<sup>[24]</sup> First, a 10 mL 0.15 M solution of ferrioxalate was prepared by dissolving potassium ferrioxalate hydrate (0.737 g) in H<sub>2</sub>SO<sub>4</sub> (10 mL of a 0.05 M solution). A 20 mL buffered solution of 1,10-phenanthroline was prepared by dissolving 1,10-phenanthroline (20 mg) and sodium acetate (4.5 g) in H<sub>2</sub>SO<sub>4</sub> (20 mL of a 0.5 M solution). Both solutions were

stored in the dark. To determine the photon flux of the LED, 2.00 mL of the ferrioxalate solution was placed in a cuvette and irradiated for 90 seconds at 450 nm. After irradiation, the phenanthroline solution (0.35 mL) was added to the cuvette, and the mixture was allowed to stir in the dark for 1 h to allow the ferrous ions to completely coordinate with phenanthroline. The absorption of the solution was measured at 510 nm. A non-irradiated sample was also prepared identically and the absorption at 510 nm was also measured.

Conversion was calculated using equation 1.

$$\text{mol Fe}^{2+} = \frac{V \cdot \Delta A(510 \text{ nm})}{l \cdot \epsilon} \quad (1)$$

Where V is the total volume (0.00235 L) of the solution after addition of phenanthroline,  $\Delta A$  is the difference in absorbance at 510 nm between the irradiated and non-irradiated solutions, l is the path length (1.0 cm), and  $\epsilon$  is the molar absorptivity of the ferrioxalate actinometer at 510 nm ( $11100 \text{ L mol}^{-1} \text{cm}^{-1}$ ).

The value of mol  $\text{Fe}^{2+}$  was  $1.93 \times 10^{-7}$  mol.

The photon flux can be calculated using equation 2.

$$\text{Photon flux} = \frac{\text{molFe}^{2+}}{\Phi \cdot t \cdot f} \quad (2)$$

Where  $\Phi$  is the quantum yield for the ferrioxalate actinometer (0.85 at 450 nm), t is the irradiation time, and f is the fraction of light absorbed at  $\lambda_{\text{max}} = 450 \text{ nm}$  by the ferrioxalate actinometer. This value is calculated using equation 3 where A is the absorbance of the ferrioxalate solution at 450 nm. An absorption spectrum gave an A value of  $> 3$ , indicating that the fraction of absorbed light (f) is  $> 0.999$ .

$$f = 1 - 10^{-A(450 \text{ nm})}$$

The photon flux was calculated to be  $2.52 \times 10^{-9}$  einsteins  $\text{s}^{-1}$

#### **Determination of the reaction quantum yield**

Phenylacetylene **1a** (20.4 mg, 0.20 mmol, 1.0 equiv.) and *S*-phenyl 4-methylbenzenesulfonothioate **2a** (105.8 mg, 0.40 mmol, 2.0 equiv.) and  $\text{g-C}_3\text{N}_4$  (10 mg) were sequentially added to an oven-dried Schlenk tube equipped with a magnetic stir bar in DMSO (2 mL) at rt. The reaction vial was sealed, evacuated and backfilled three times with argon, then irradiated at 450 nm at ambient temperature for 90 minutes using the same setup as for the photon flux determination. Then, the NMR



yield was determined (25%) using  $\text{CH}_2\text{Br}_2$  as internal standard. The reaction quantum yield was determined using equation 4, where photon flux was determined as above described,  $t$  is the reaction time,  $f$  is the fraction of incident light absorbed by the reaction mixture. This value is calculated using equation 3 where  $A$  is the absorbance of the reaction mixture at 450 nm. An absorption spectrum gave an  $A$  (450 nm) value of  $> 3$ , indicating that the fraction of absorbed light ( $f$ ) is  $> 0.999$ .

$$\Phi = \frac{\text{mol of product formed}}{\text{photo flux} \cdot t \cdot f} \quad (4)$$

The reaction quantum yield ( $\Phi$ ) was determined to be 3.67, which is above unity, indicating that a free radical chain mechanism might be involved in the reaction.

### 8.7 Hammett plot analysis

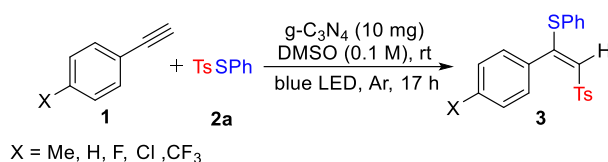

Compound **1** (0.2 mmol, 1.0 equiv.), *S*-phenyl 4-methylbenzenesulfonylthioate **2a** (105.8 mg, 0.40 mmol, 2.0 equiv.) and  $\text{g-C}_3\text{N}_4$  (10 mg) and DMSO (2 mL) were added to a group of 10 mL glass vials (5 intotal) at room temperature. The vials were purged with Ar and sealed with PTFE cap. This reaction mixture was irradiated at 450 nm at ambient temperature. One of the reaction vials was quenched by  $\text{Et}_2\text{O}$  every 30 minutes. Then, the reaction mixture was filtered. The filtrate was transferred to a separate funnel using 20 mL  $\text{Et}_2\text{O}$  and 30 mL water and extracted with  $\text{Et}_2\text{O}$  (3 x 20 mL). The combined organic layers were dried with over  $\text{Na}_2\text{SO}_4$  and concentrated in vacuo. All samples were analyzed by  $^1\text{H}$  NMR ( $\text{CH}_2\text{Br}_2$  as the internal standard) to determine the yields. The kinetic rate was plotted for each aryl alkynes substrate (Figure S2), the slopes of which were used as the rate constant to calculate the  $\lg(K_X/K_H)$  (Table S6).

**Figure S2. Reaction profiles of the catalyst system**

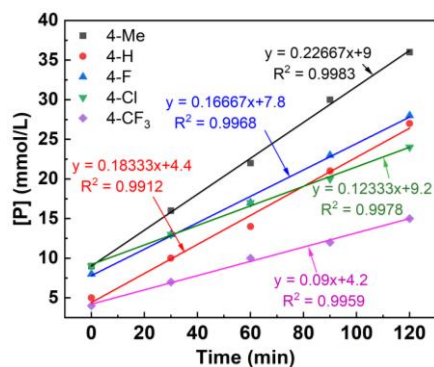

**Table S6 Kinetic data of the catalyst system**

| Entry                     | $\sigma$ | $K_X$   | $\lg(K_X/K_H)$ |
|---------------------------|----------|---------|----------------|
| <i>p</i> -CH <sub>3</sub> | -0.17    | 0.22667 | 0.092160       |
| H                         | 0        | 0.18333 | 0              |
| <i>p</i> -F               | 0.062    | 0.16667 | -0.041376      |
| <i>p</i> -Cl              | 0.227    | 0.12333 | -0.172165      |
| <i>p</i> -CF <sub>3</sub> | 0.54     | 0.09    | -0.308991      |

The  $\lg(K_X/K_H)$  for each aryl alkynes was then plotted against the corresponding  $\sigma$  value reported by the literature (Figure S3).<sup>[25]</sup> A linear correlation with slope ( $\rho = -0.58$ ) was observed in the Hammett plot of our reaction system, which indicated that (1) the electron-deficient alpha-alkenyl radical was formed; (2) this was a stepwise reaction and the radical addition to the triple bond was the rate-determining step.

**Figure S3.** Hammett plot of *para*-substituted aryl alkynes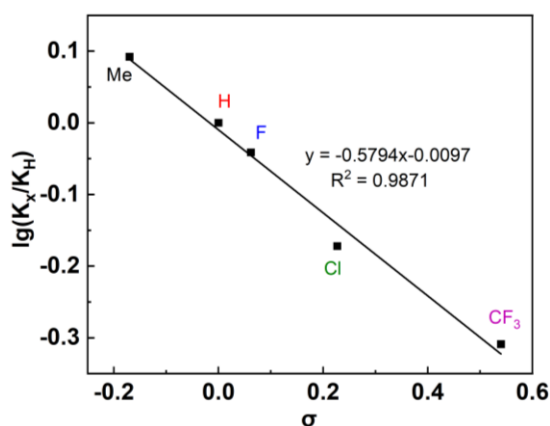

## 9. References

- [1] Li, Z.; Wang, K. F.; Zhao, X.; Ti, H.; Liu, X. G.; Wang, H. *Nat. Commun.* **2020**, *11*, 5036.
- [2] Jiang, Y. F.; Zhu, W. C.; Liu, X. Y.; Tian, S. Y.; Han, J. H.; Rao, W.; Shen, S. S.; Sheng, D.; Wang, S. Y. *Org. Lett.* **2023**, *25*, 1776.
- [3] Lü, S.; Wang, Z.; Gao, X.; Chen, K.; Zhu, S. *Angew. Chem. Int. Ed.* **2023**, *62*, e202300268.
- [4] Joule, J. A.; Sancineto, L.; Kibambe, J. K.; Scimmi, C.; Santi, C. *Arkivoc* **2022**, *2023*, 135.
- [5] Yang, B.; Zhang, X. Y.; Yue, H. Q.; Li, W. Z.; Li, M.; Lu, L.; Wu, Z. Q.; Li, J.; Sun, K.; Yang, S. D. *Adv. Synth. Catal.* **2022**, *364*, 3528.
- [6] Huang, C.-M.; Li, J.; Wang, S.-Y.; Ji, S.-J. *Chin. Chem. Lett.* **2020**, *31*, 1923.
- [7] Zhang, X.; Cui, T.; Zhang, Y.; Gu, W.; Liu, P.; Sun, P. *Adv. Synth. Catal.* **2019**, *361*, 2014.
- [8] Girijavallabhan, V.; Alvarez, C.; Njoroge, F. G. *J. Org. Chem.* **2011**, *76*, 6442.
- [9] Guo, H.; Zhang, S.; Li, Y.; Yu, X.; Feng, X.; Yamamoto, Y.; Bao, M. *Angew. Chem. Int. Ed.* **2022**, *61*, e202116870.
- [10] Santandrea, J.; Minozzi, C.; Cruche, C.; Collins, S. K. *Angew. Chem. Int. Ed.* **2017**, *56*, 12255.
- [11] Zheng, L.; Guo, X.; Li, Y. C.; Wu, Y.; Xue, X. S.; Wang, P. *Angew. Chem. Int. Ed.* **2023**, *62*, e202216373.
- [12] Naidu, M. S. R. P., R. *JCSB.* **1984**, *23*, 140.
- [13] Sun, K.; Shi, Z.; Liu, Z.; Luan, B.; Zhu, J.; Xue, Y. *Org. Lett.* **2018**, *20*, 6687.
- [14] Liu, Y.; Zheng, G.; Zhang, Q.; Li, Y.; Zhang, Q. *J. Org. Chem.* **2017**, *82*, 2269.
- [15] Back, T. G.; D, M.; Hamilton, V. J. J.; Lim; Parvez, M. *J. Org. Chem.* **2005**, 967.
- [16] Back, T. G.; M. Vijaya Krishna; Muralidharan, K. R. *J. Org. Chem.* **1989**, *54*, 4146.
- [17] Back, T. G.; Enoch K. Y. Lai; Muralidharan, K. R. *J. Org. Chem.* **1990**, *55*, 4595.
- [18] Reddy, R. J.; Kumari, A. H.; Sharadha, N.; Krishna, G. R. *J. Org. Chem.* **2022**, *87*, 3934.
- [19] Cruché, C.; Neiderer, W.; Collins, S. K. *ACS Catal.* **2021**, *11*, 8829.

- [20] Chen, J.; Chen, S.; Xu, X.; Tang, Z.; Au, C. T.; Qiu, R. *J. Org. Chem.* **2016**, *81*, 3246.
- [21] Reddy, A. B.; Hymavathi, A.; Kumar, L. V.; Penchalaiah, N.; Naik, P. J.; Naveen, M.; Swamy, G. N. *Phosphorus, Sulfur Silicon Relat. Elem.* **2011**, *186*, 1721.
- [22] Li, Y.; Studer, A. *Org. Lett.* **2017**, *19*, 666.
- [23] Gadde, K.; Mampuys, P.; Guidetti, A.; Ching, H. Y. V.; Herrebout, W. A.; Van Doorslaer, S.; Abbaspour Tehrani, K.; Maes, B. U. W. *ACS Catal.* **2020**, *10*, 8765.
- [24] Cismesia, M. A.; Yoon, T. P. *Chem. Sci.* **2015**, *6*, 5426.
- [25] Hansch, C.; Leo, A.; Taft, R. W. *Chem. Rev.* **1991**, *91*, 165.

## 10. NMR Spectra

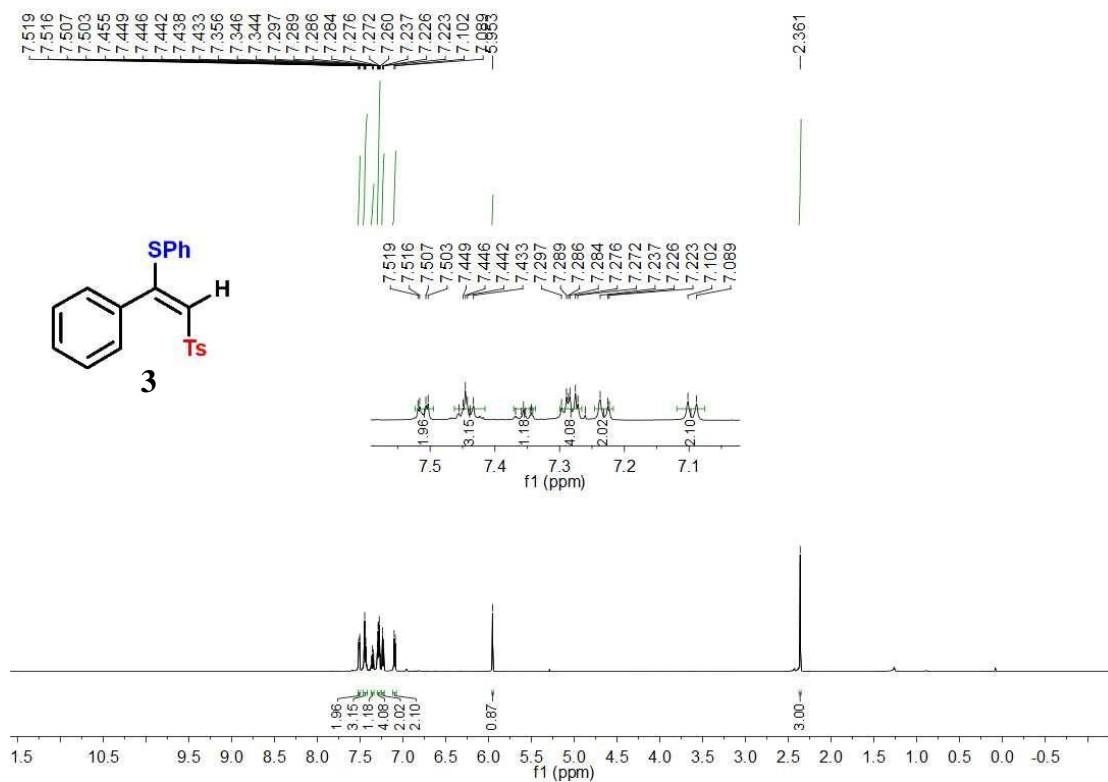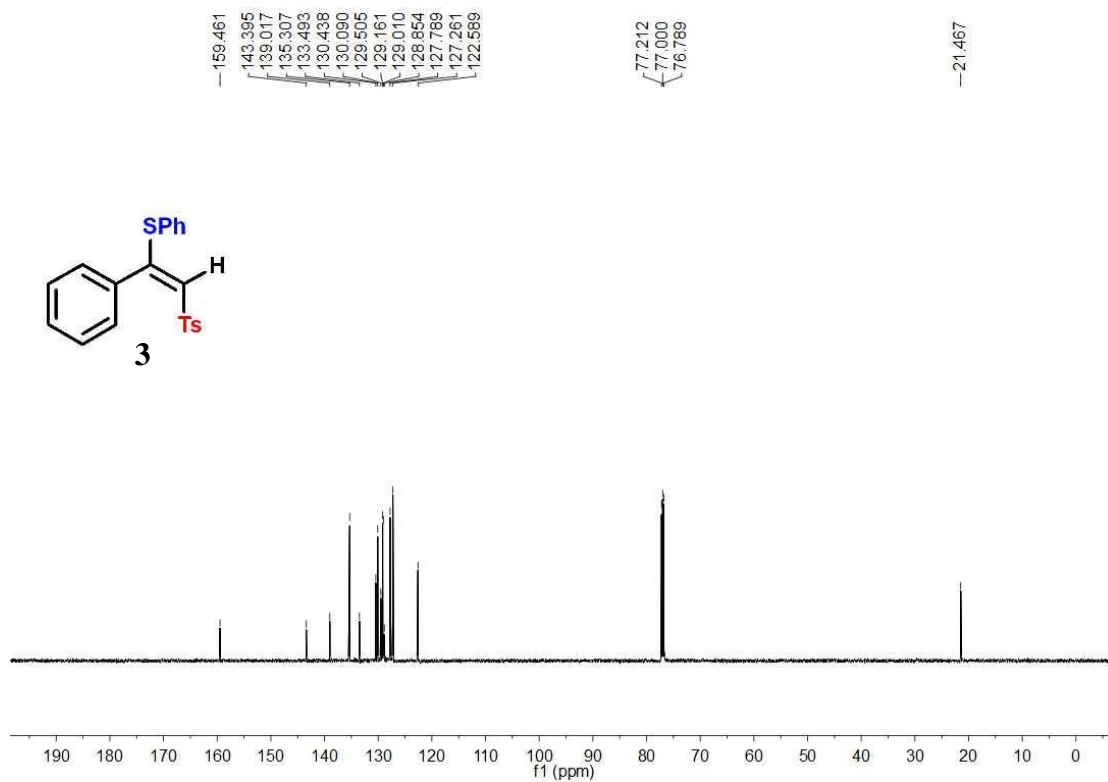

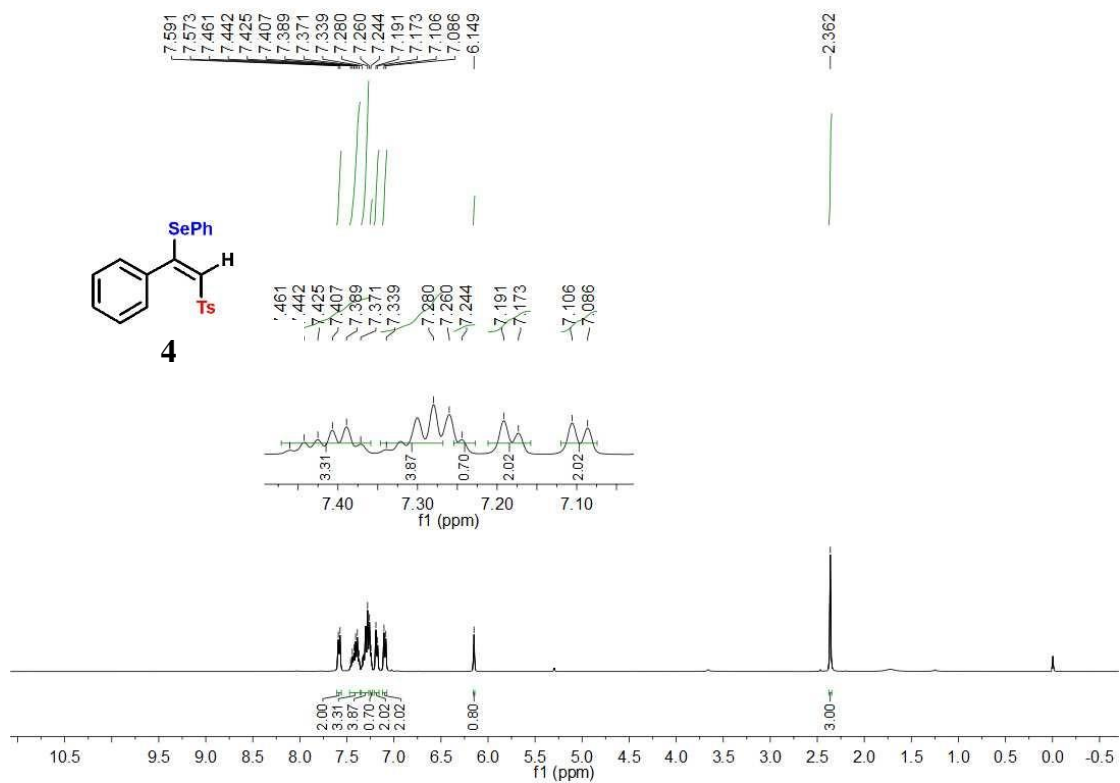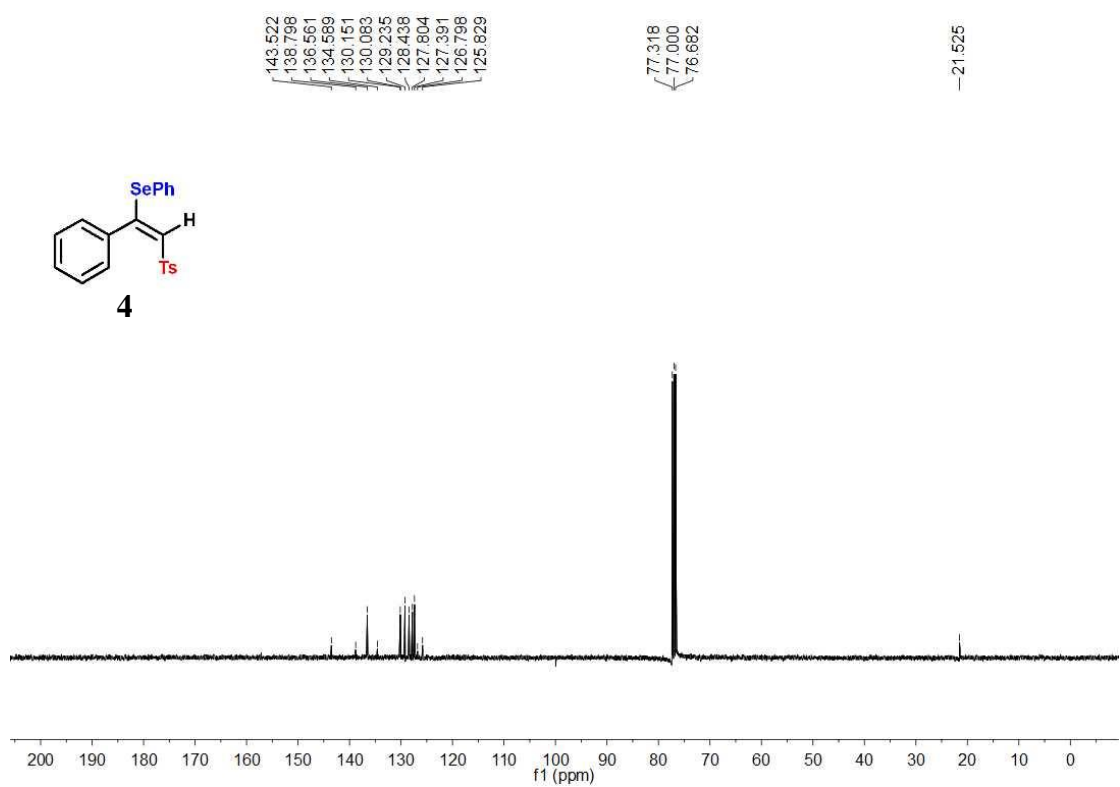

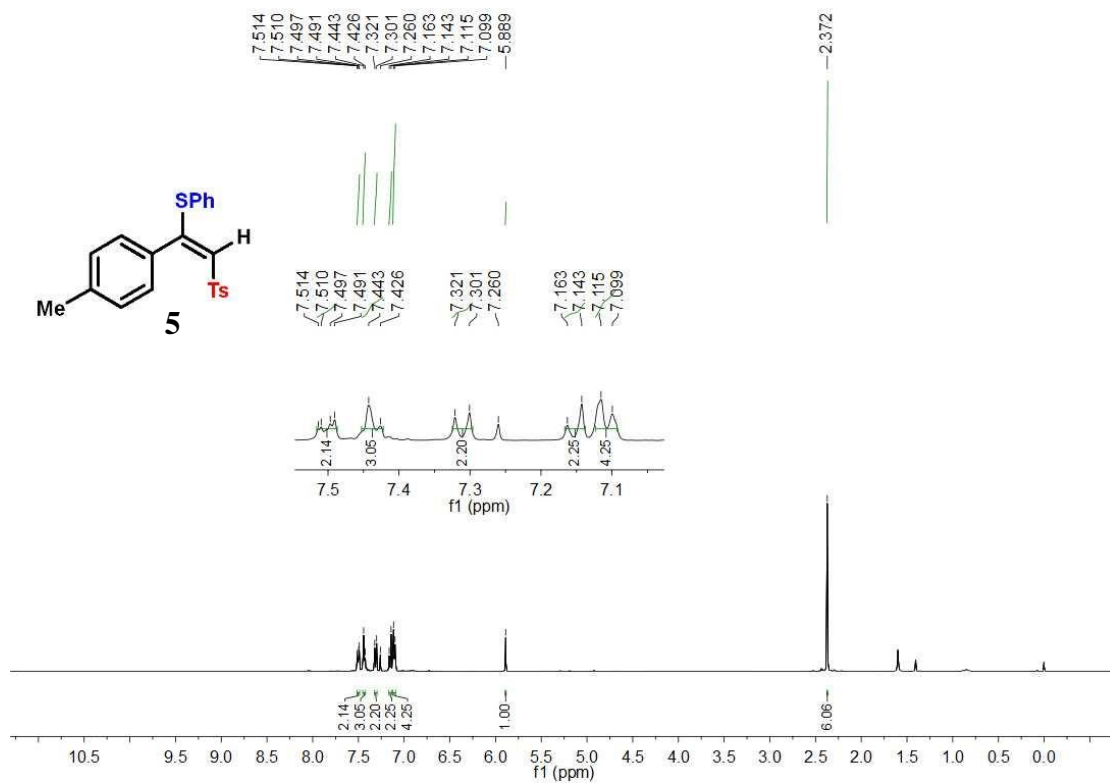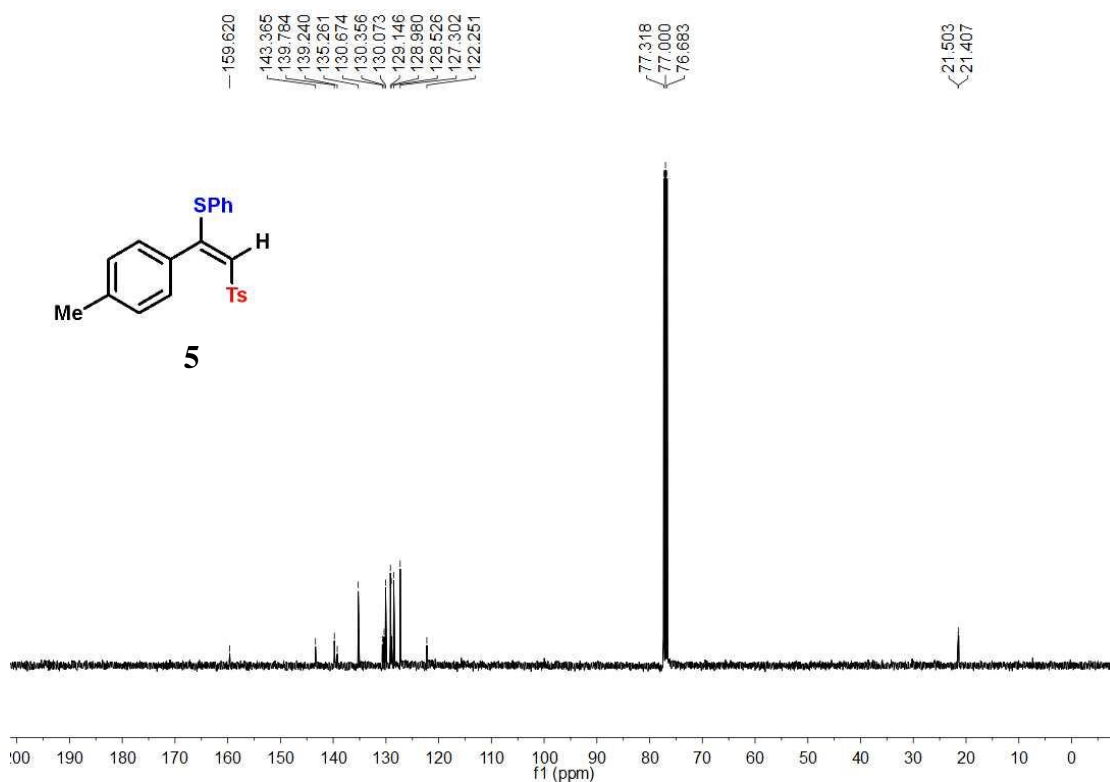

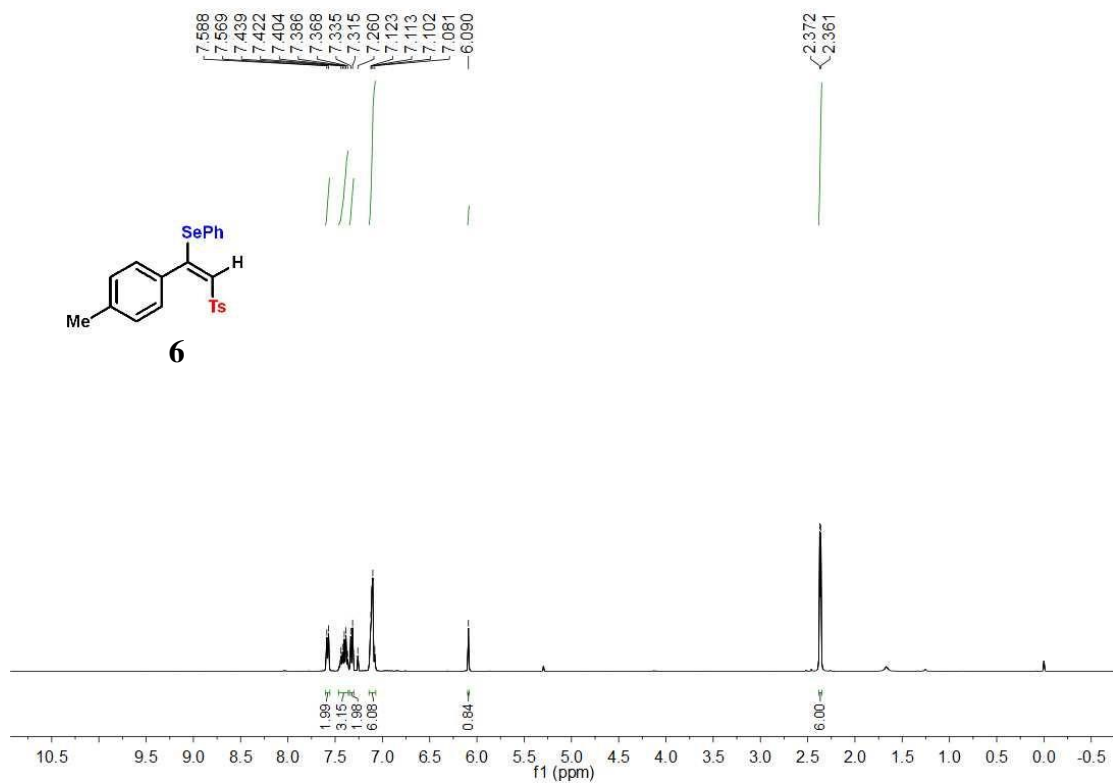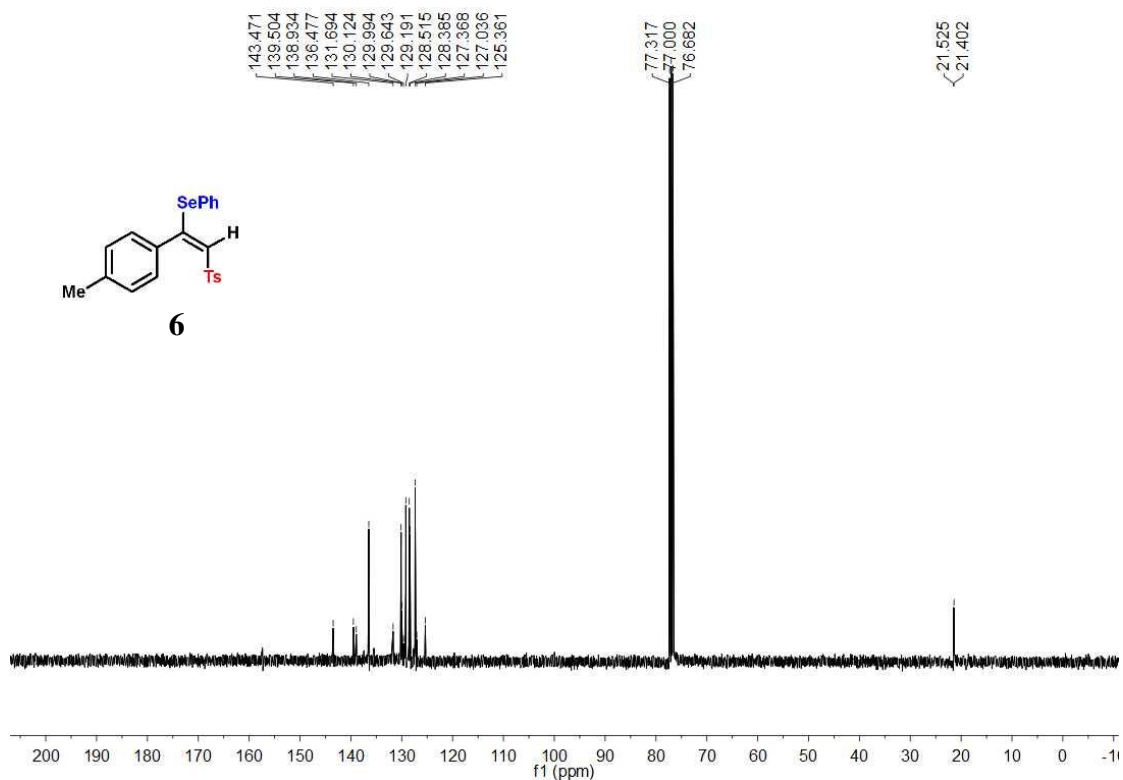



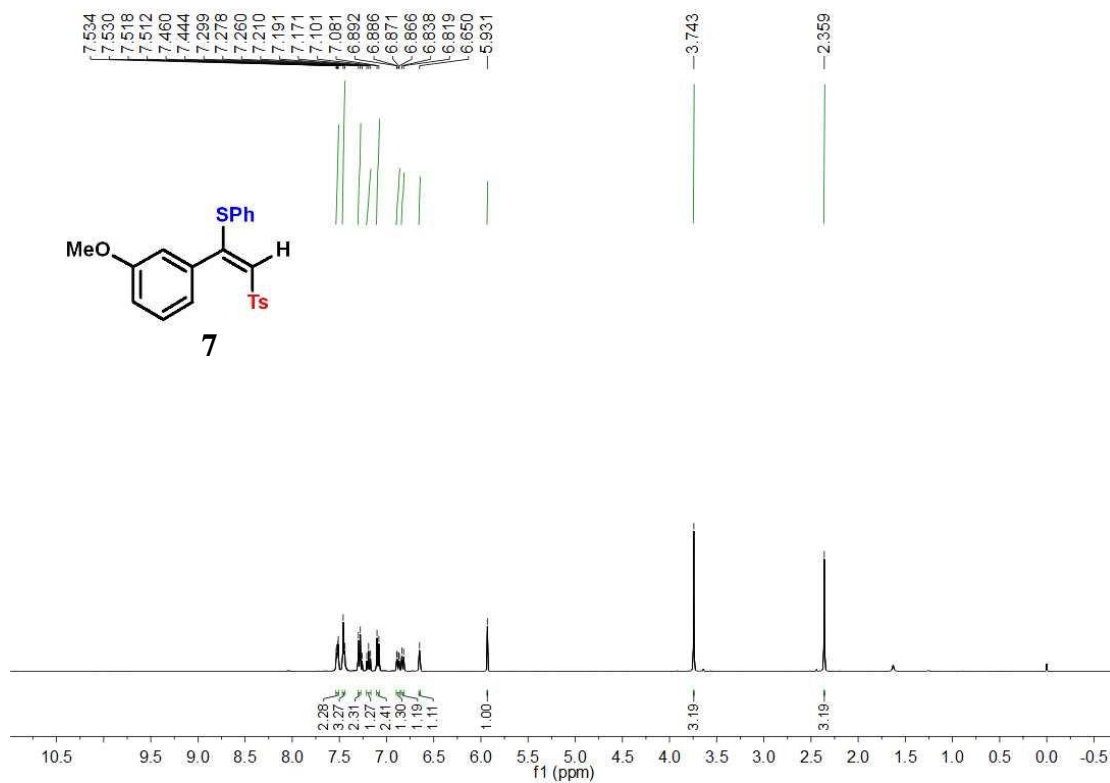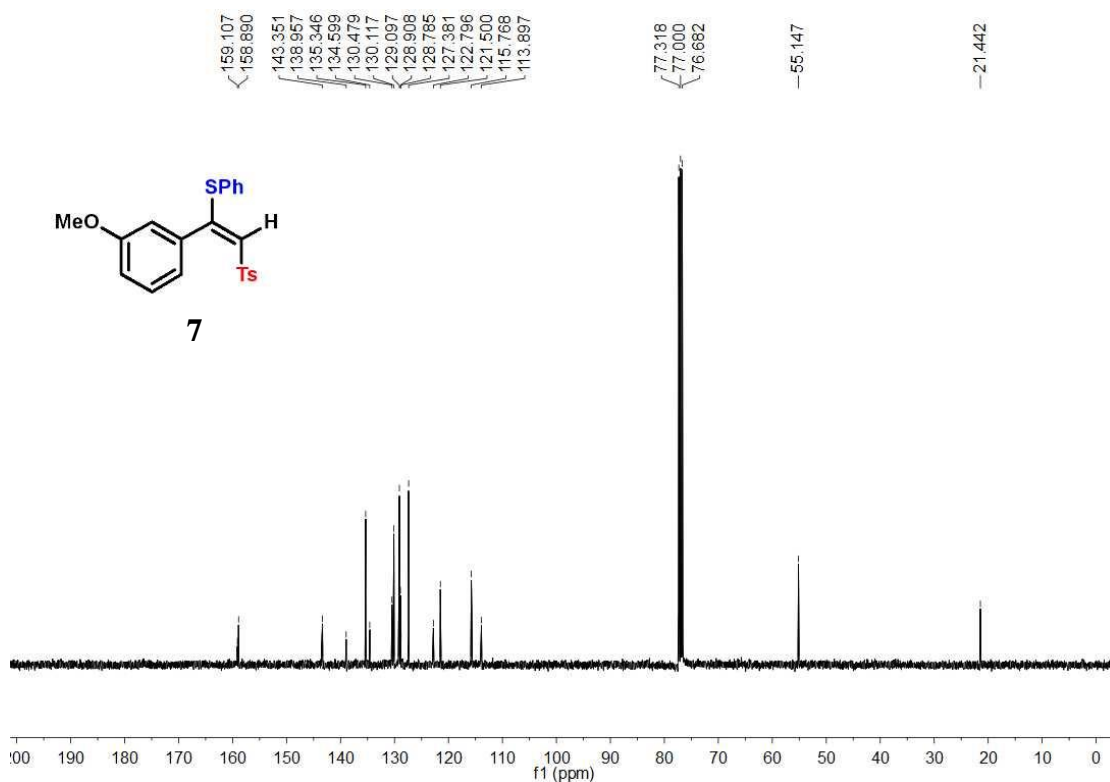

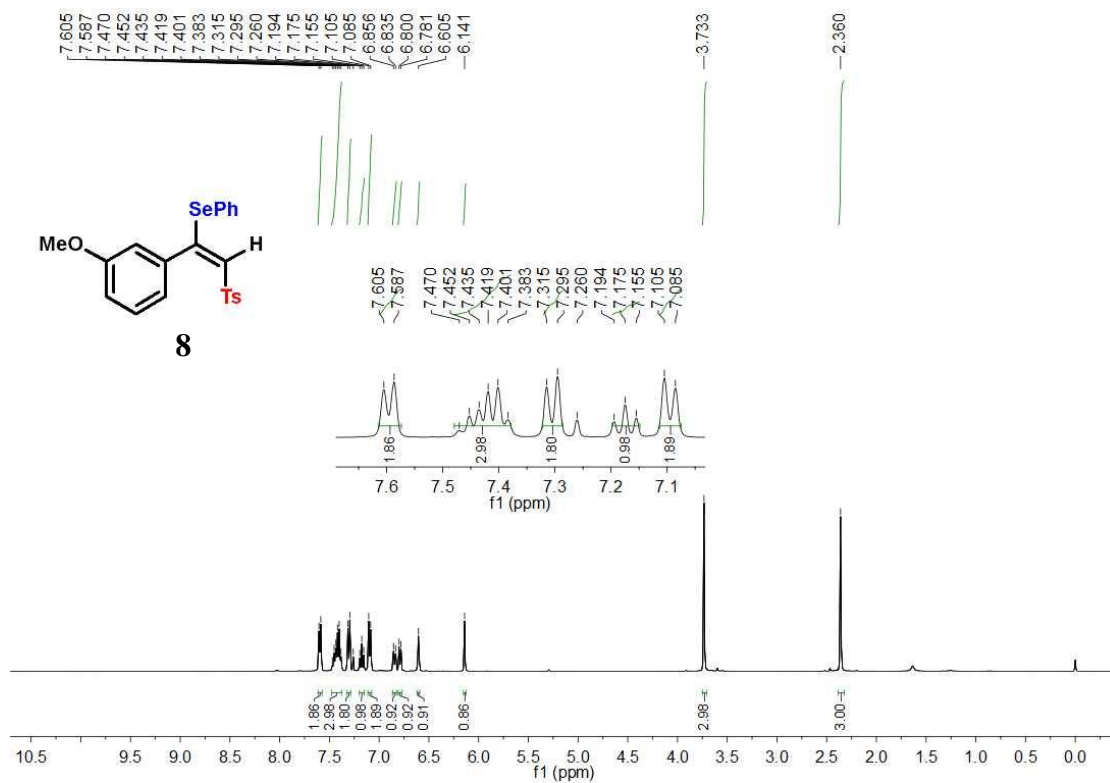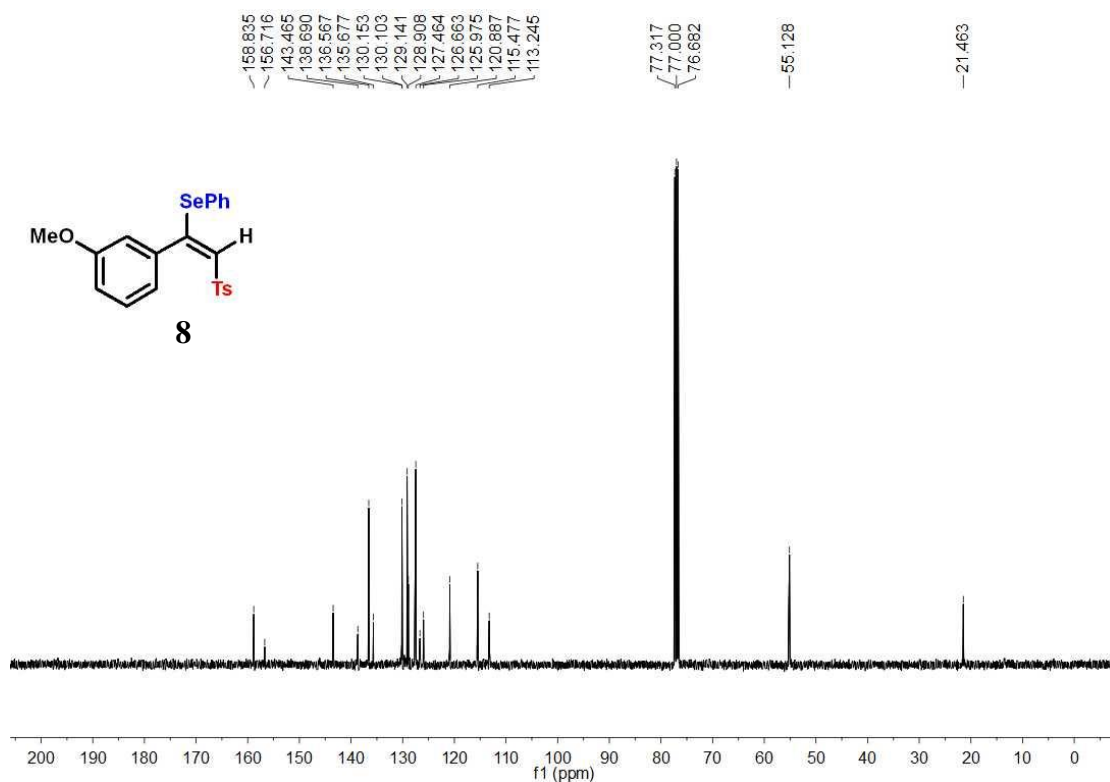

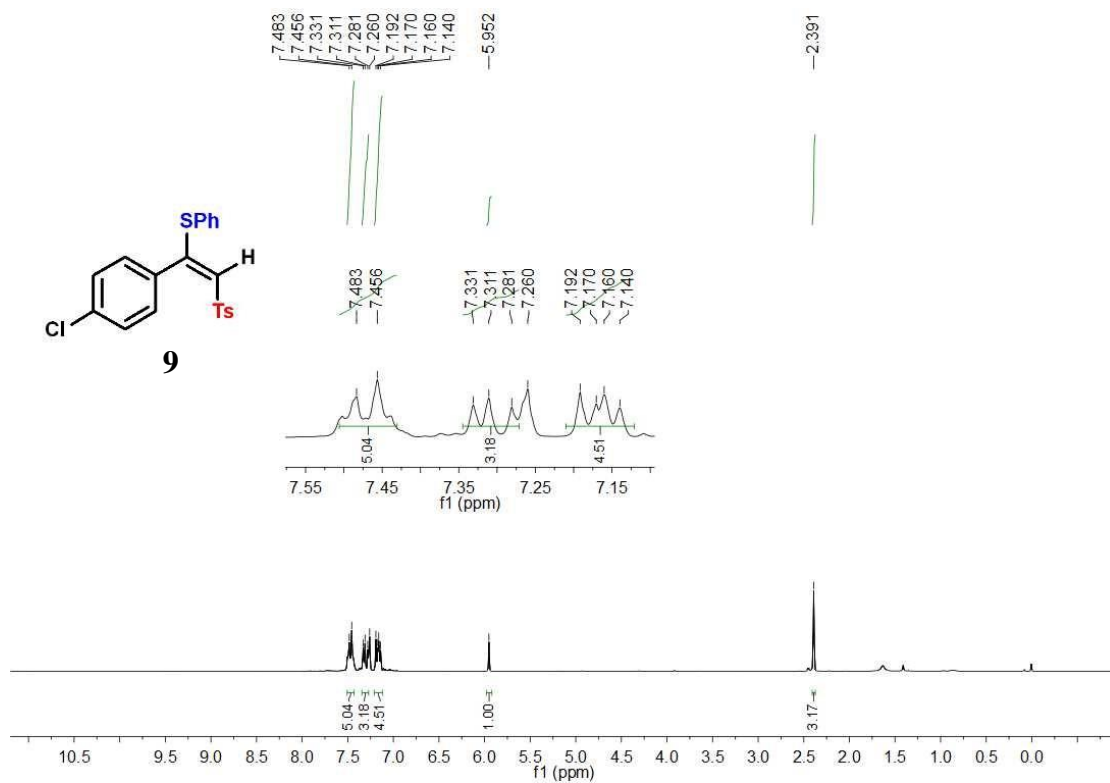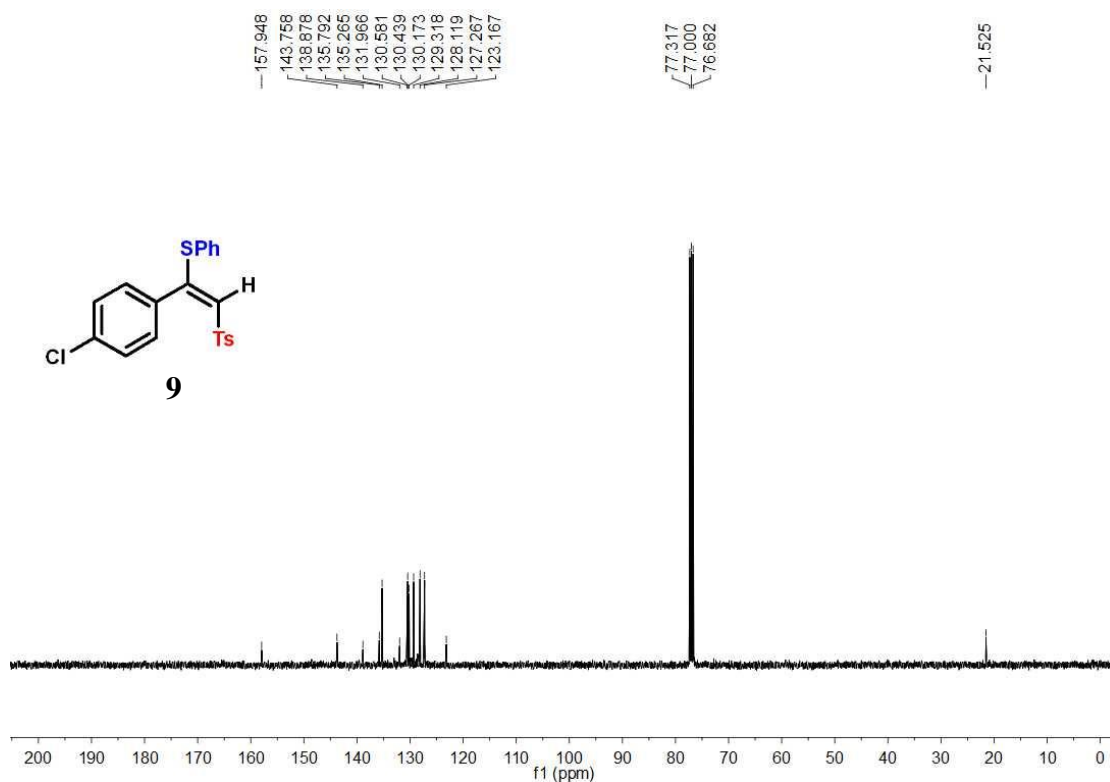

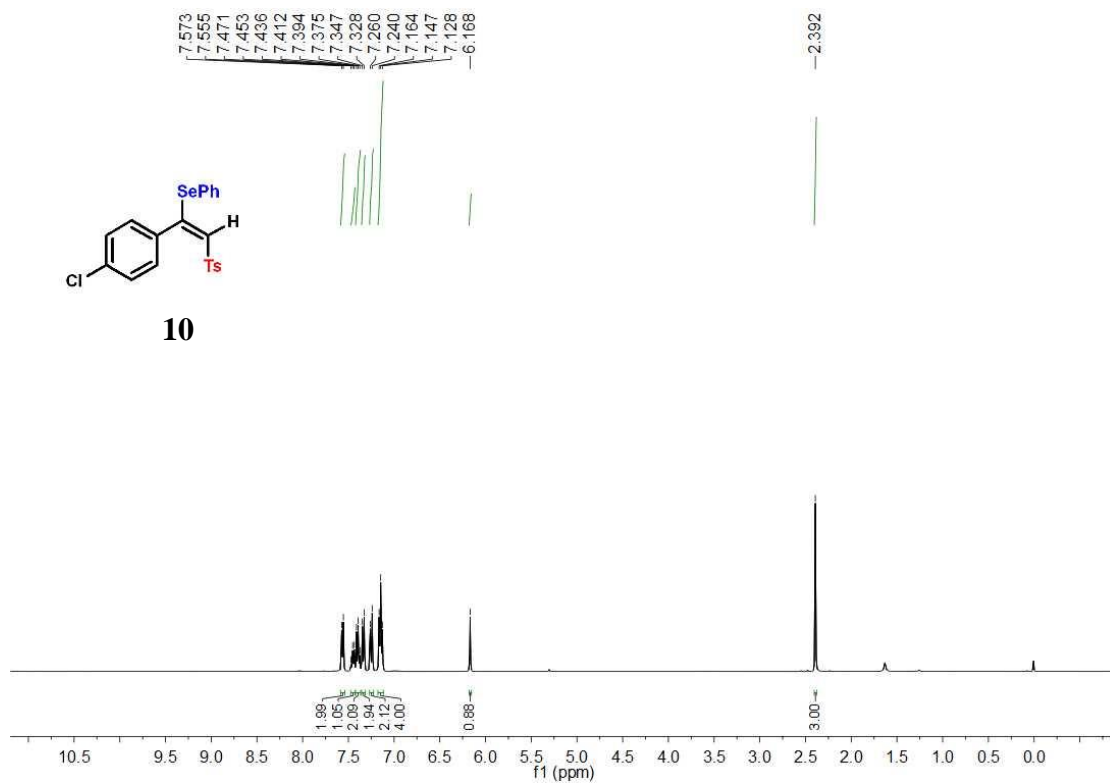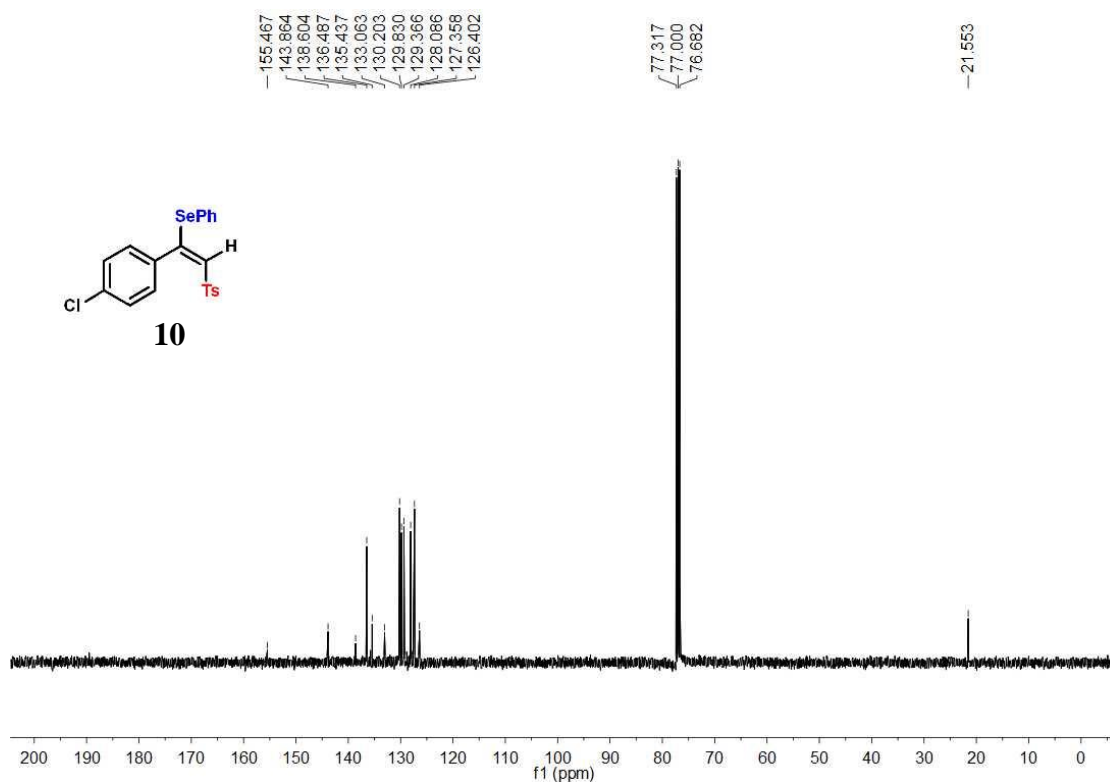

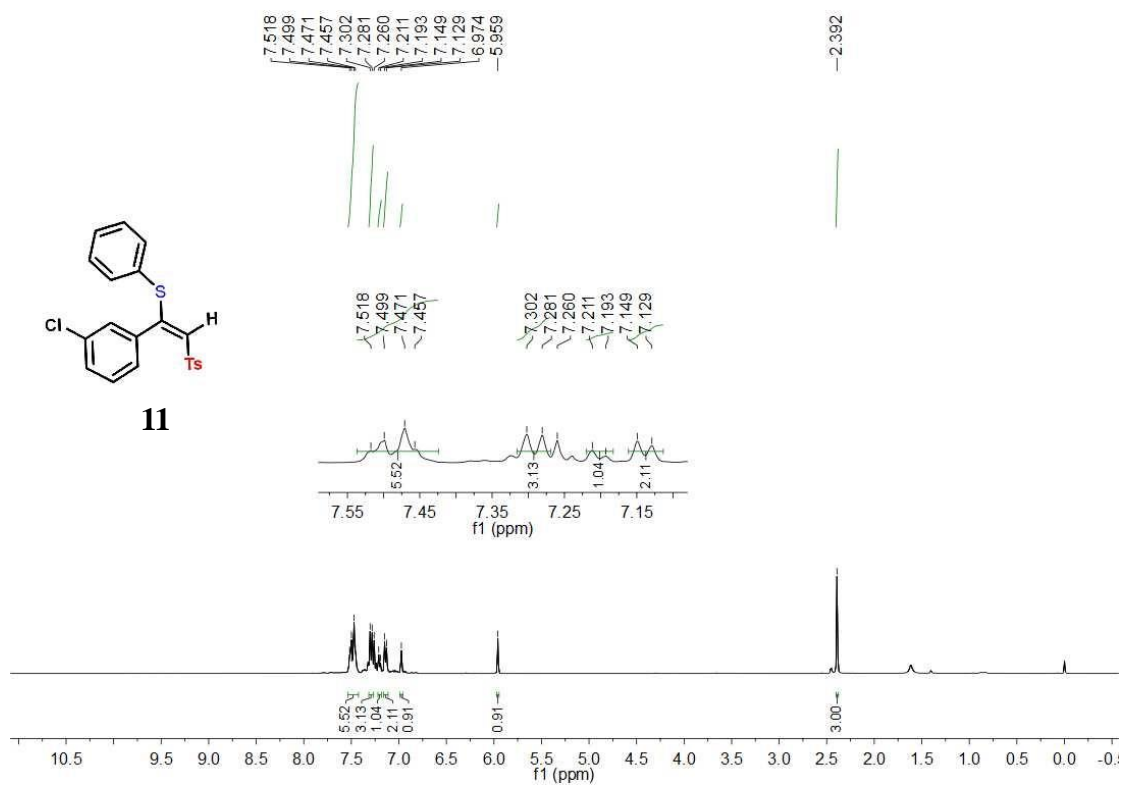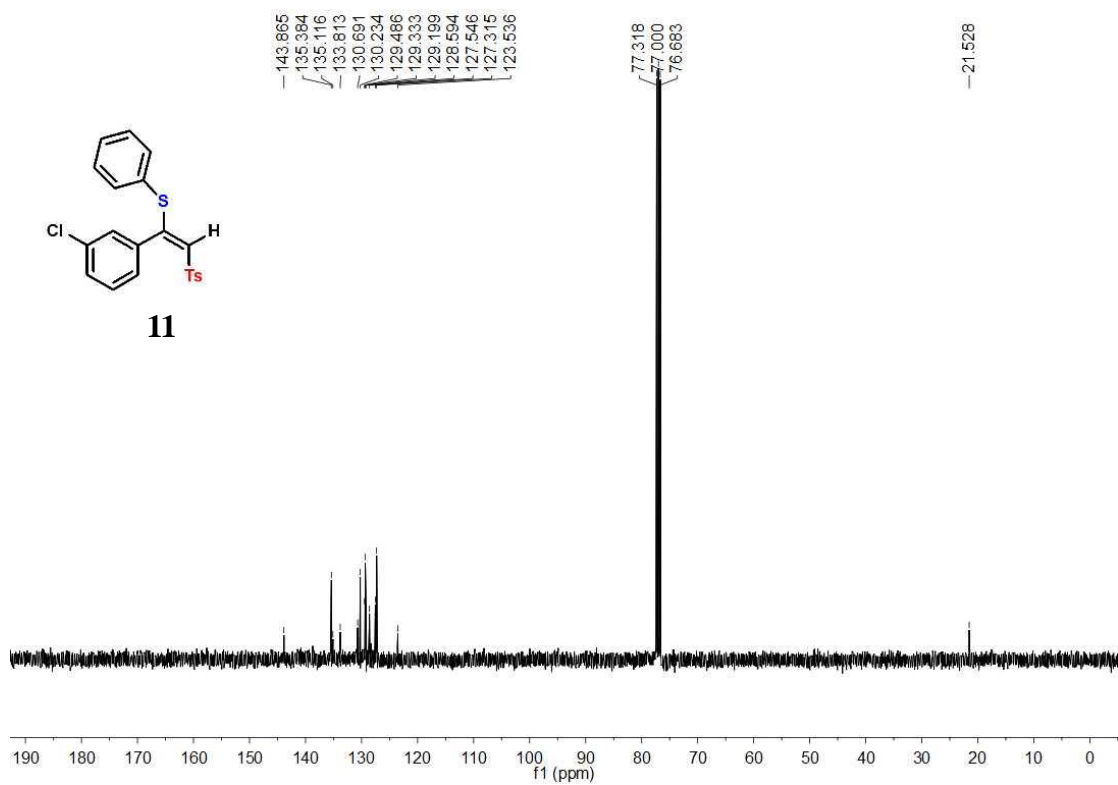

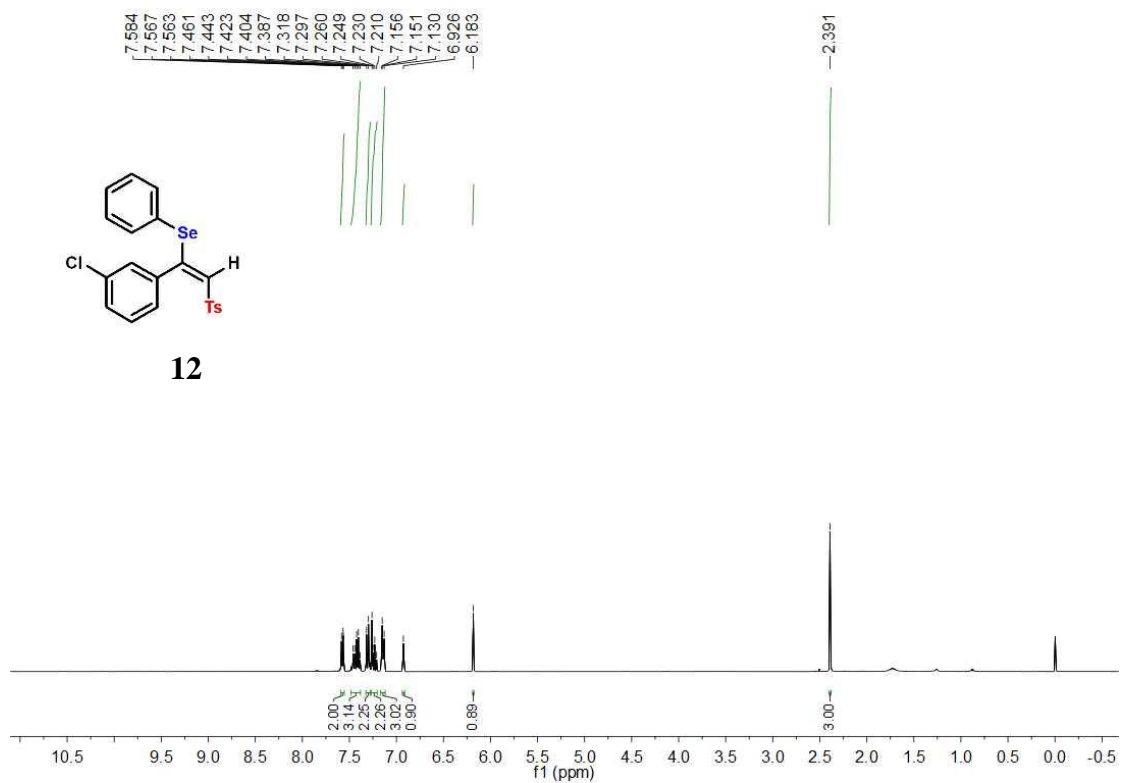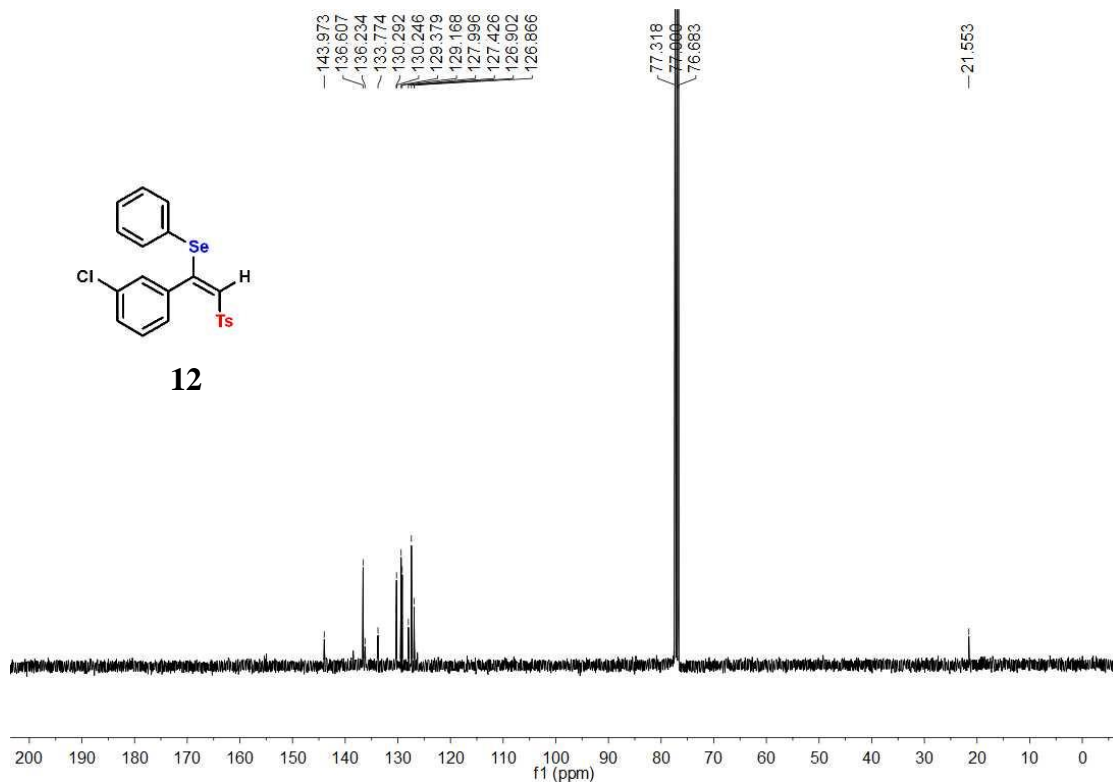

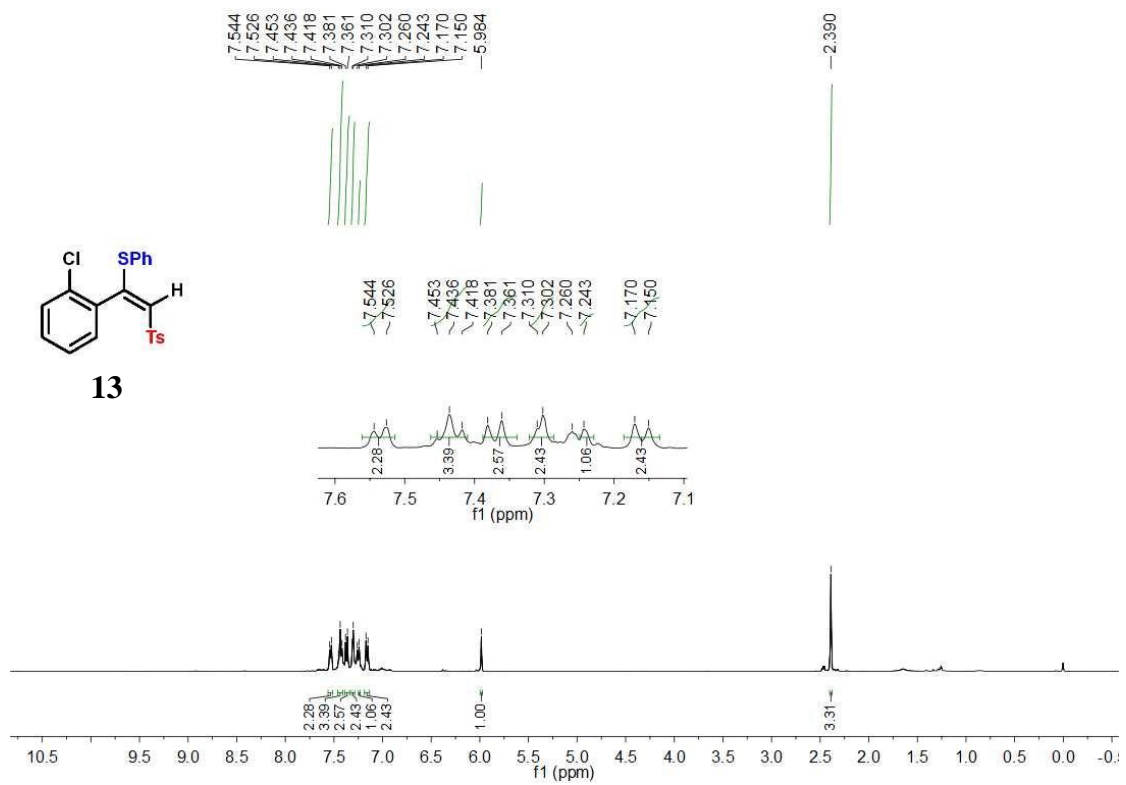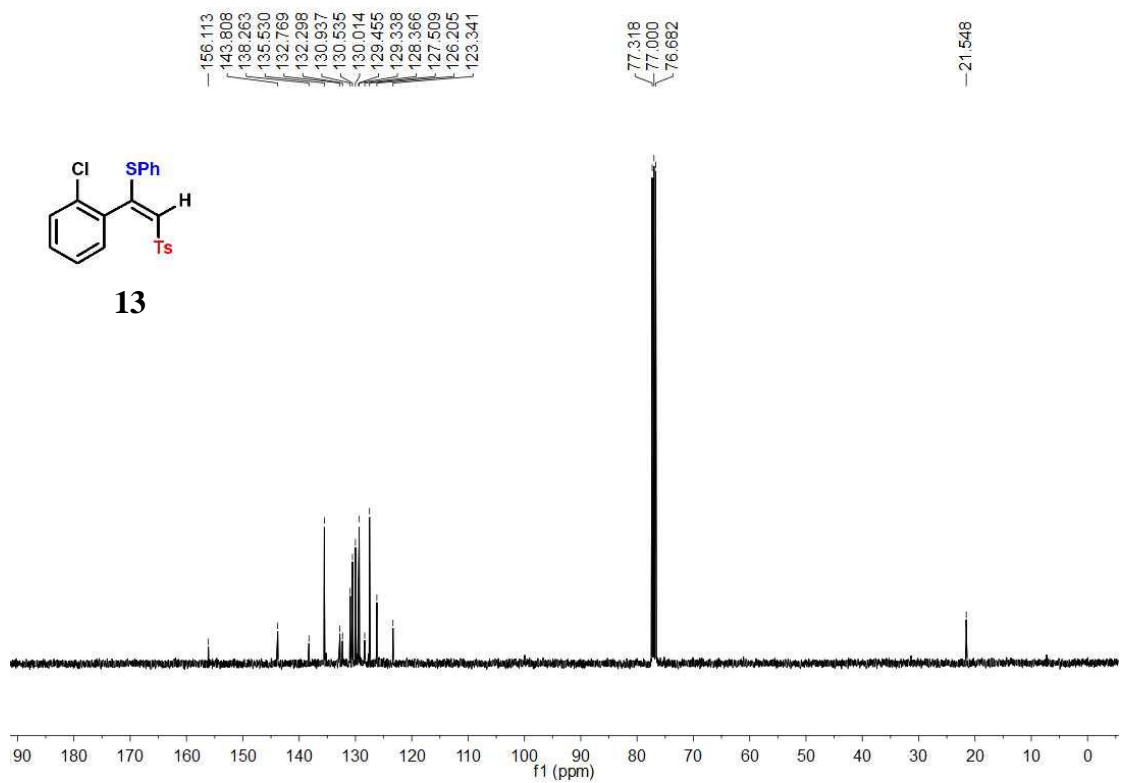

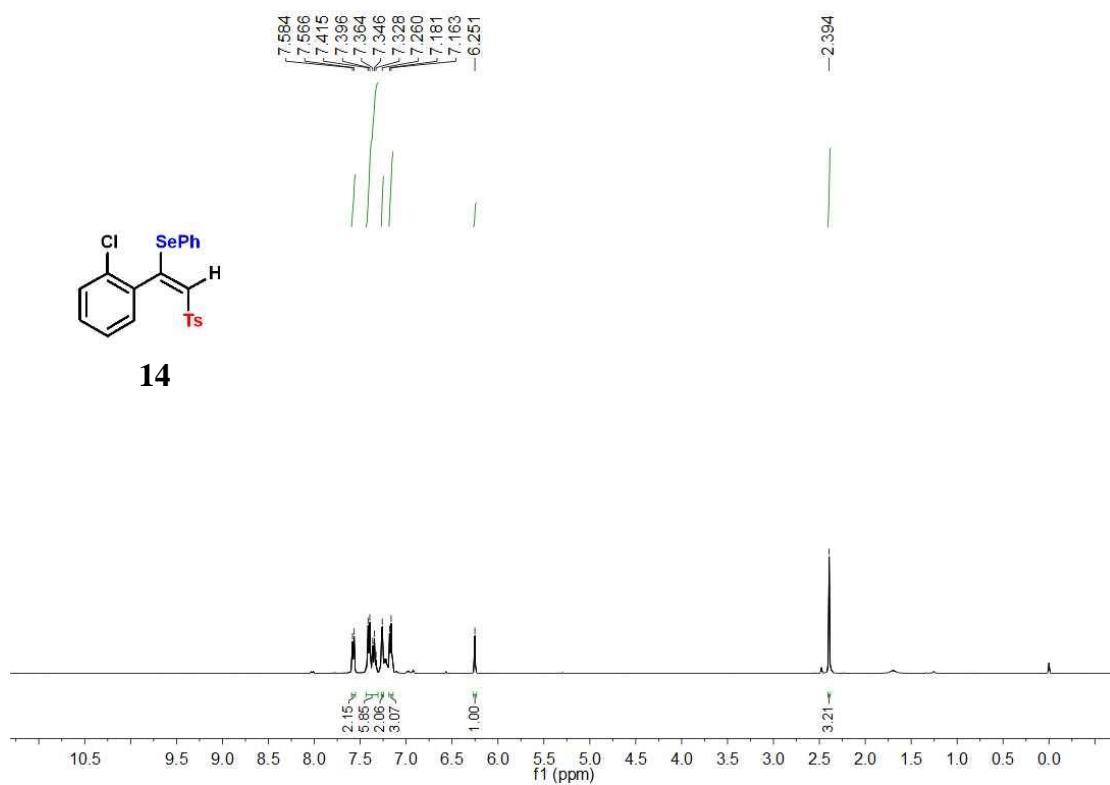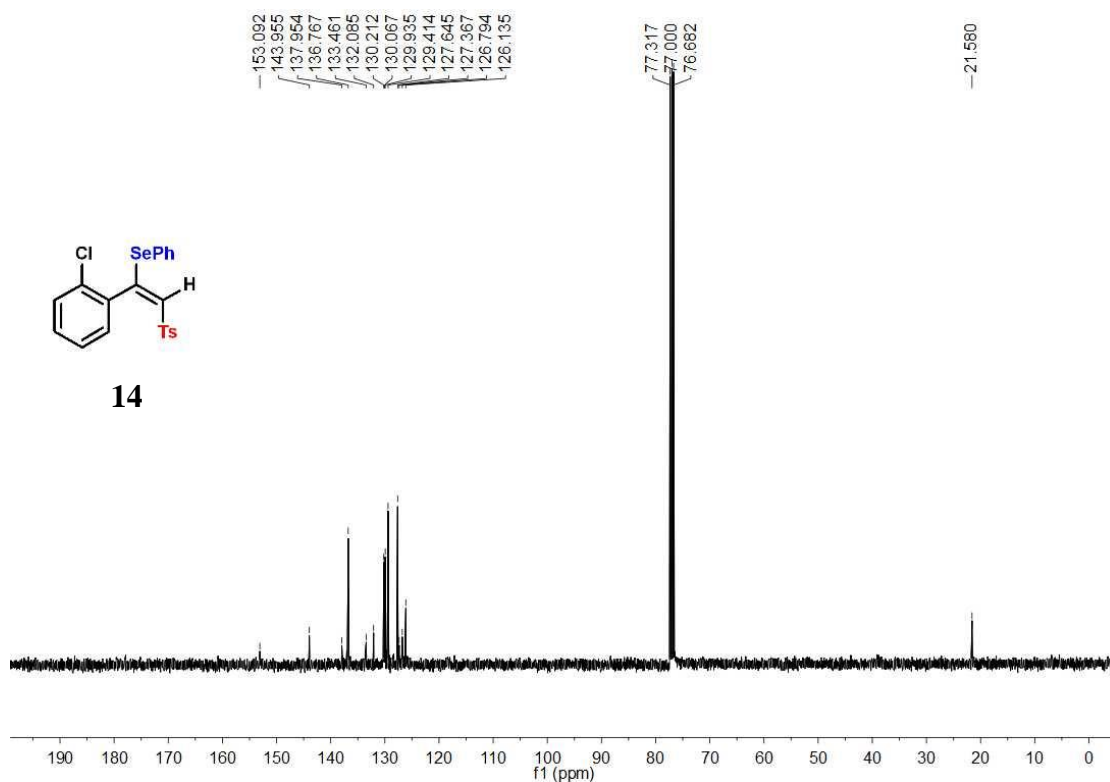



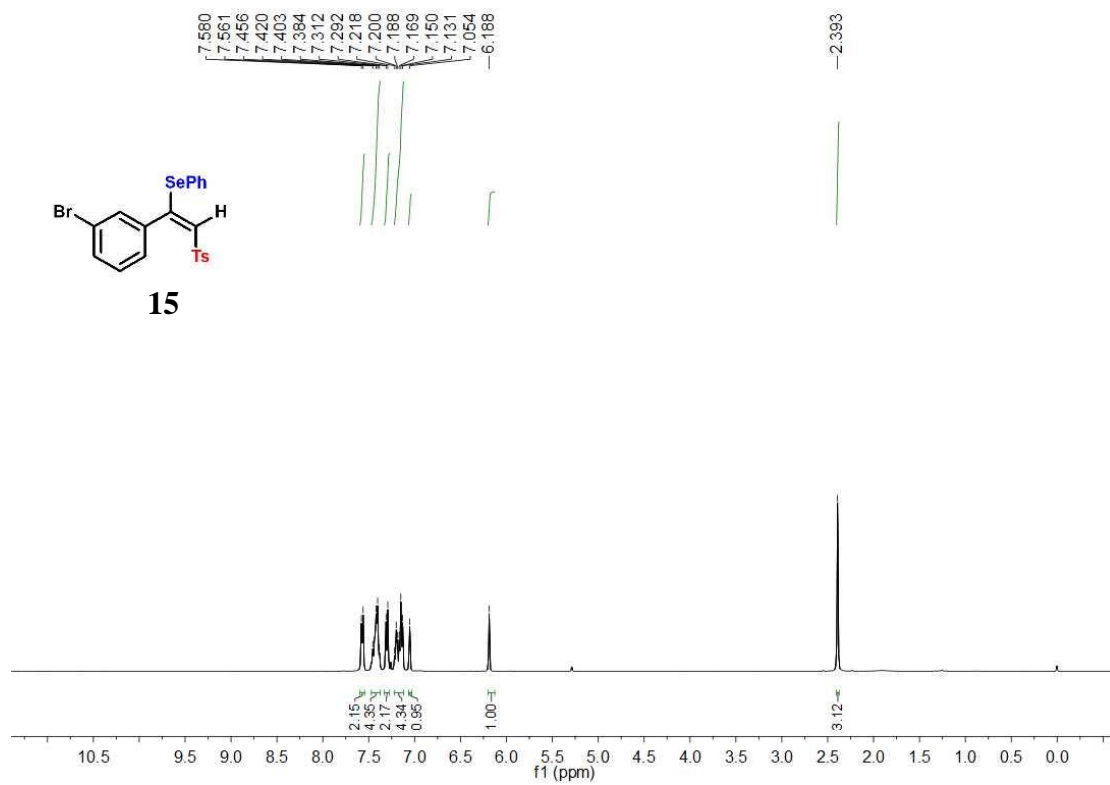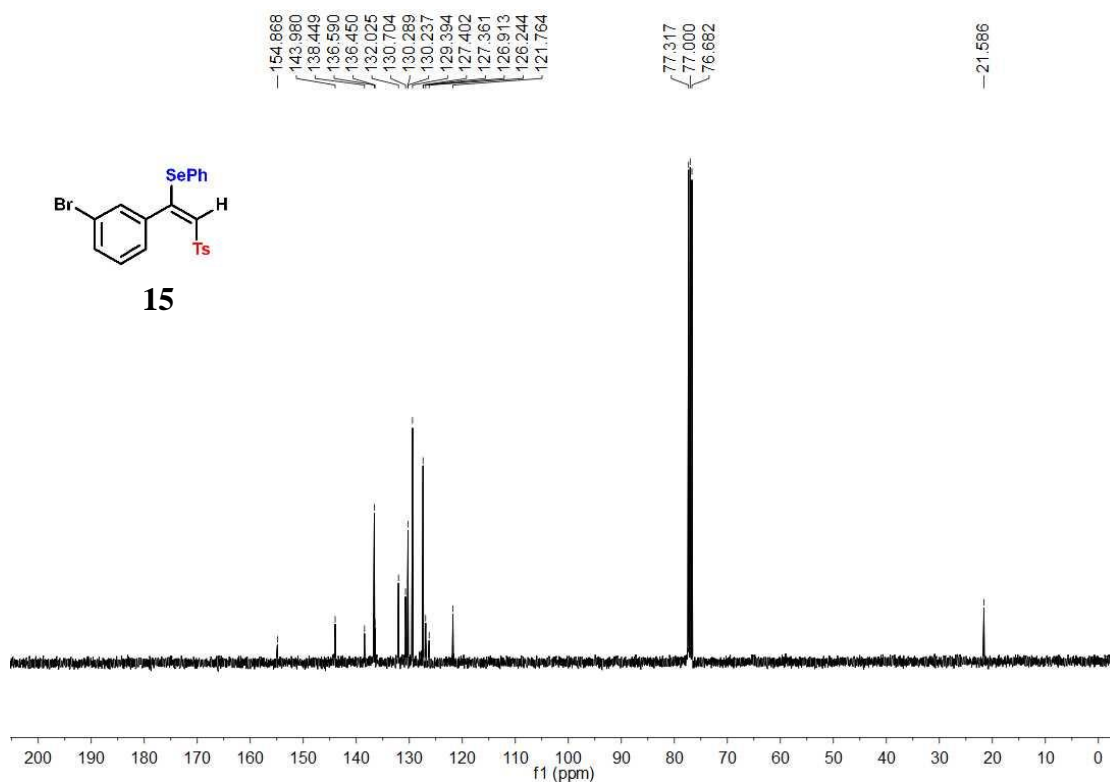

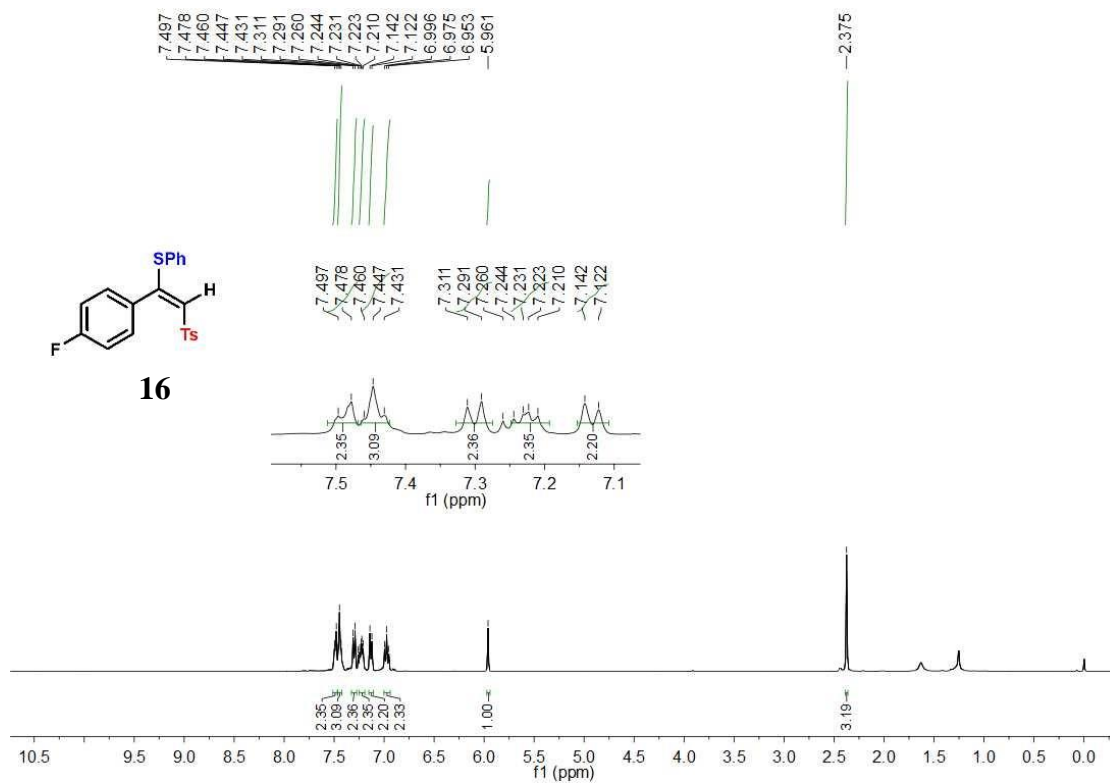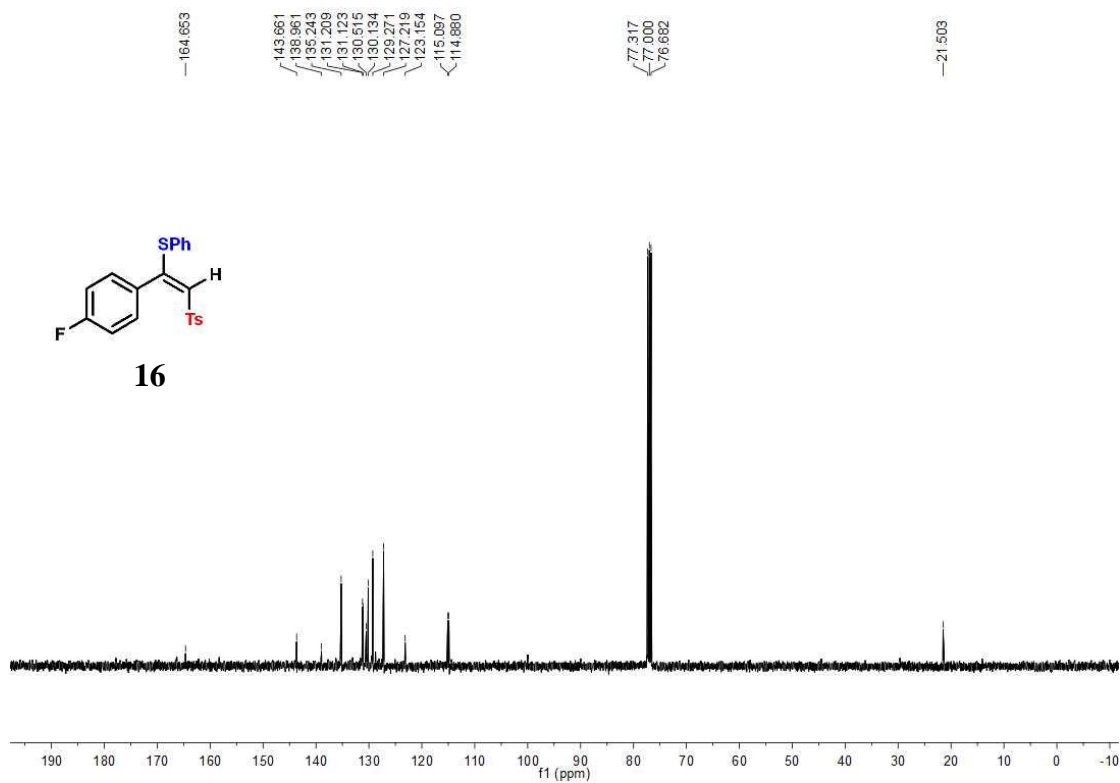

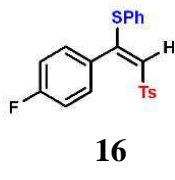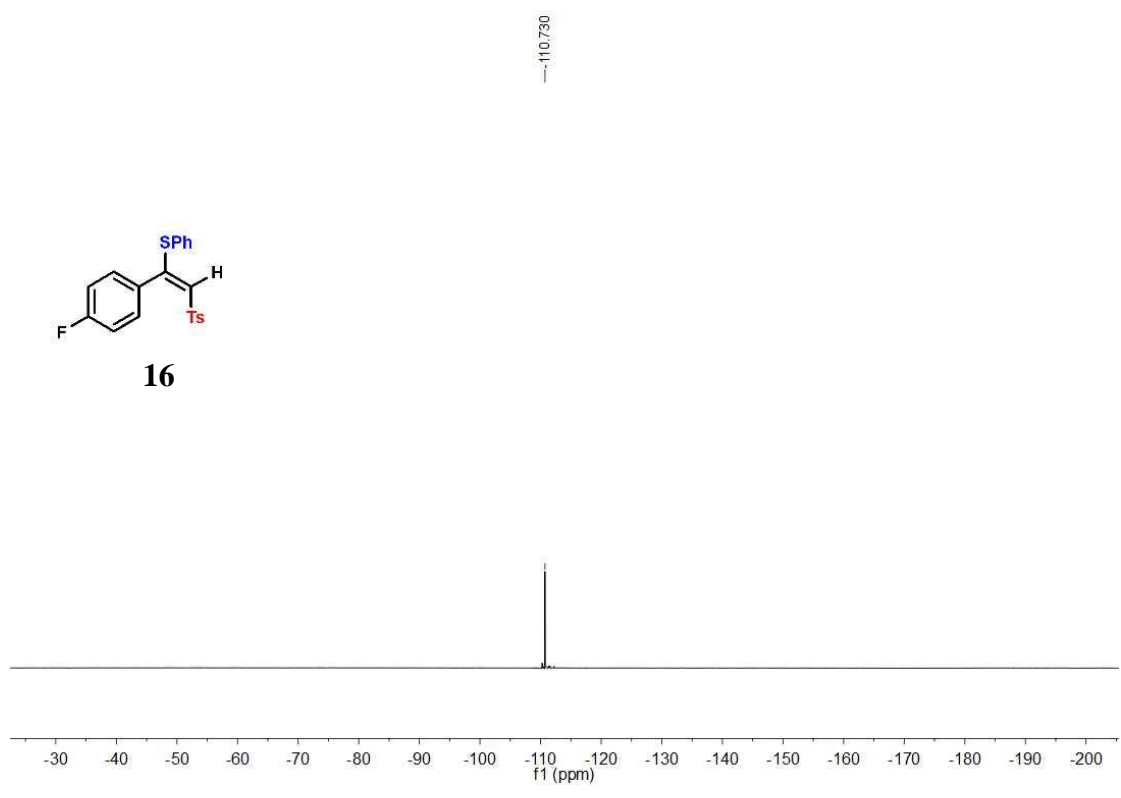

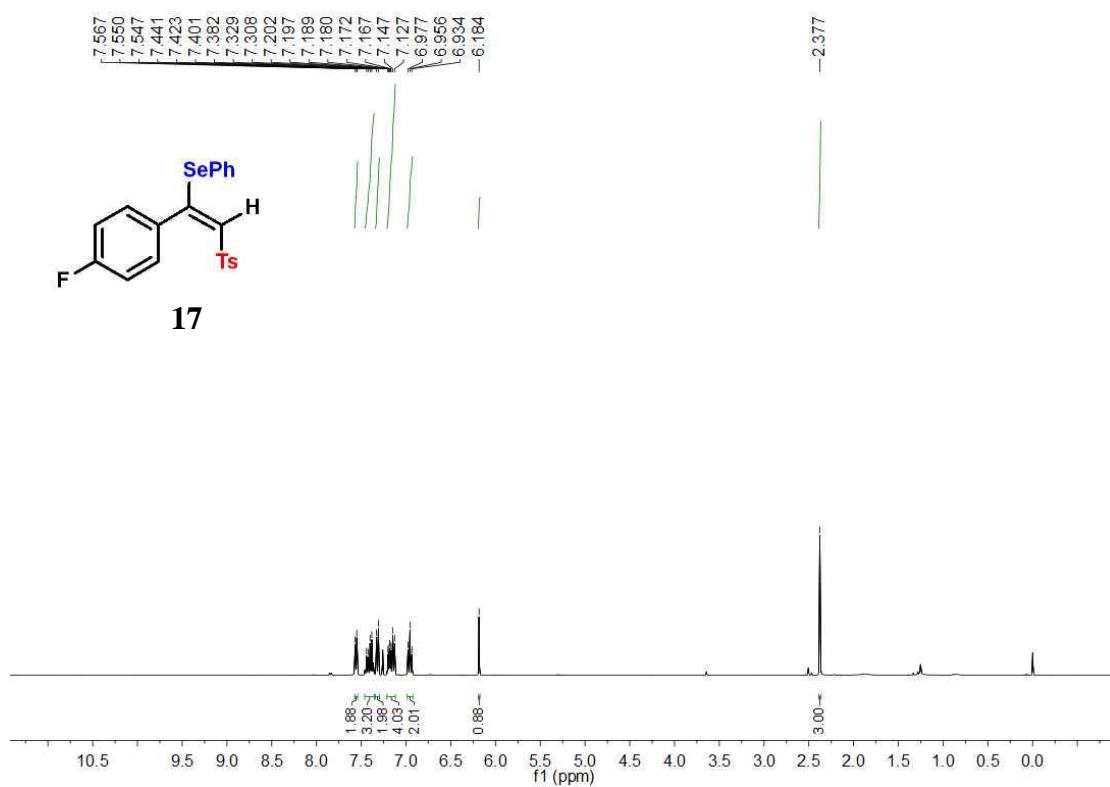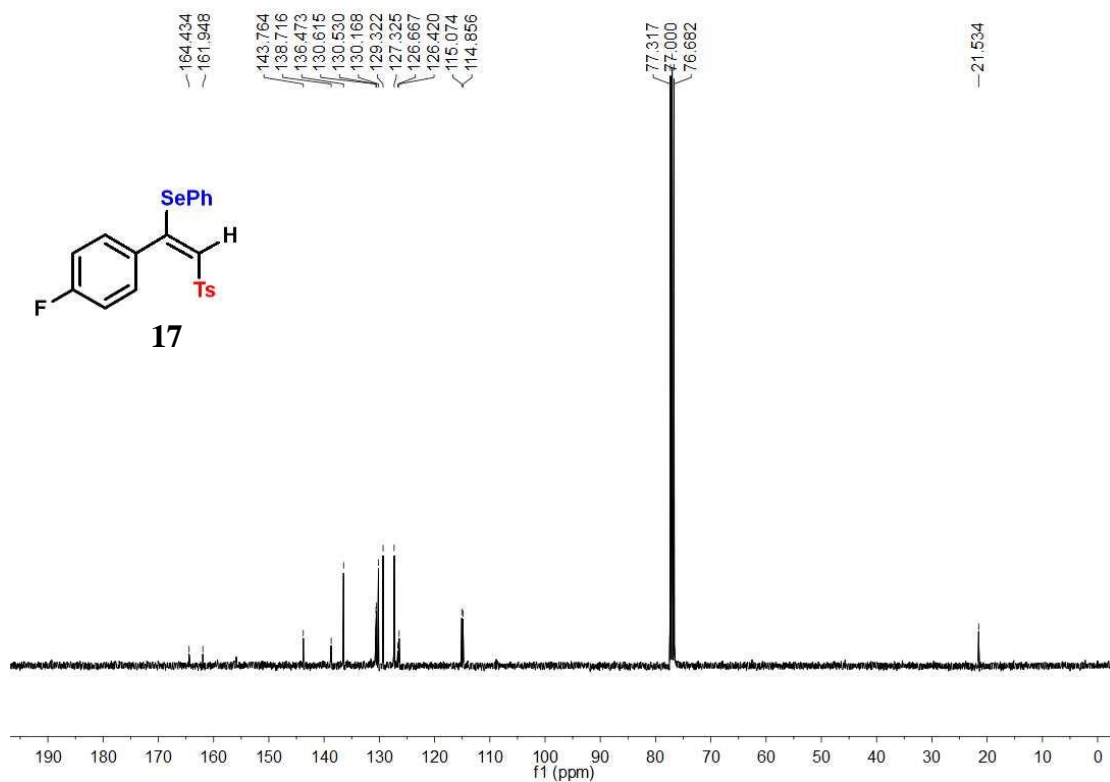

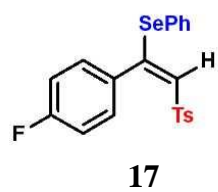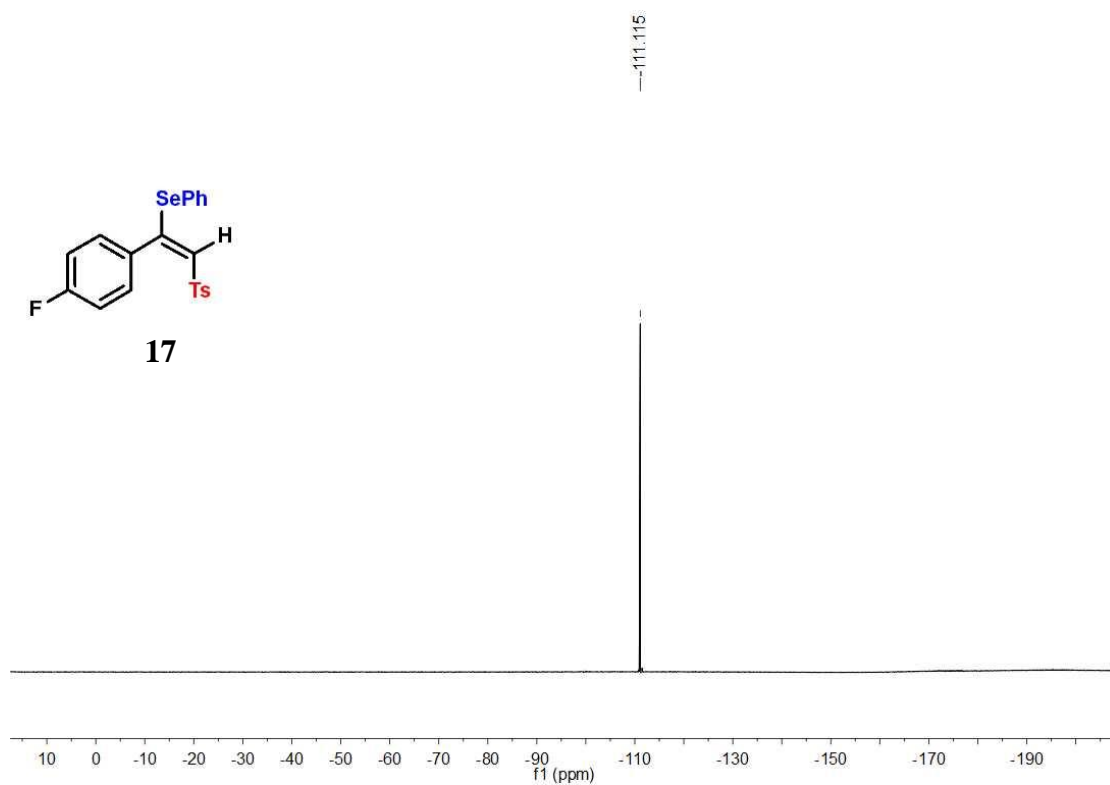

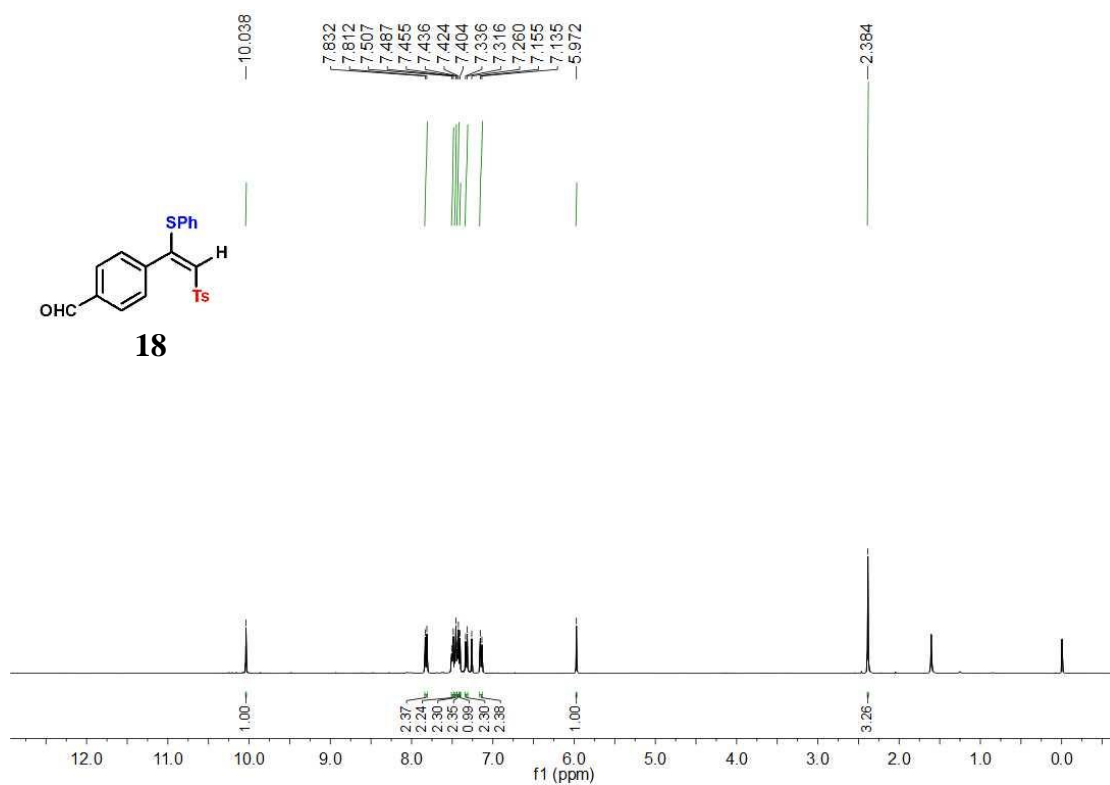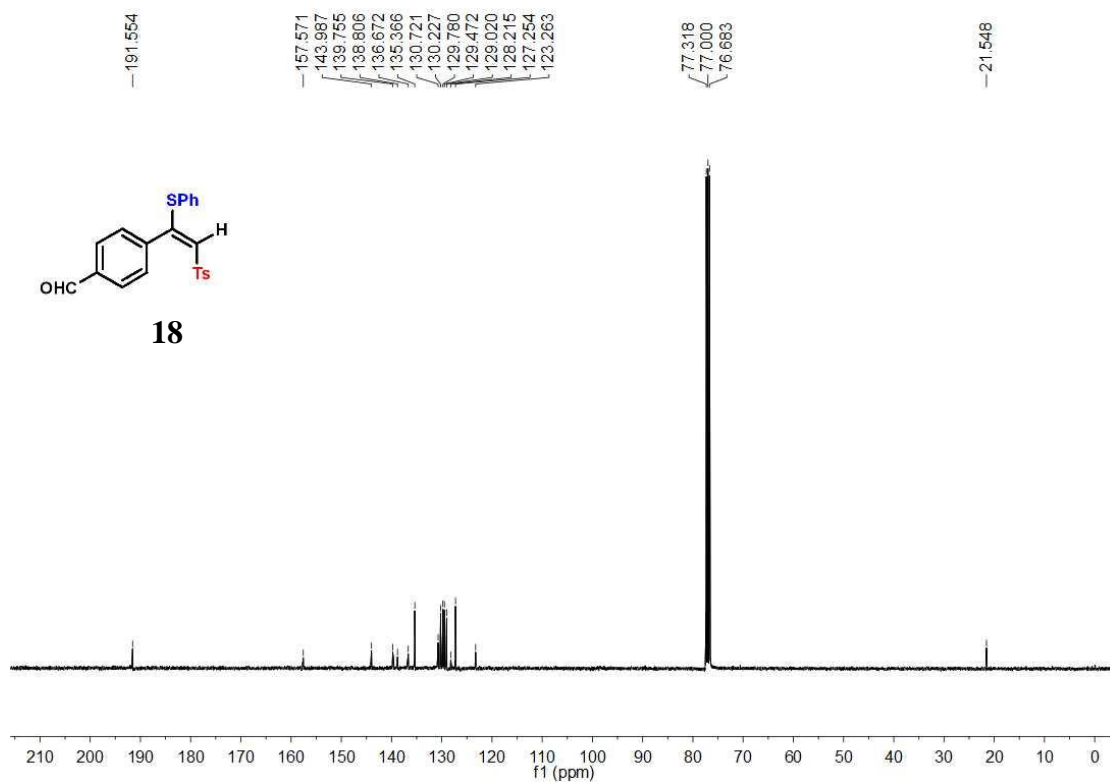

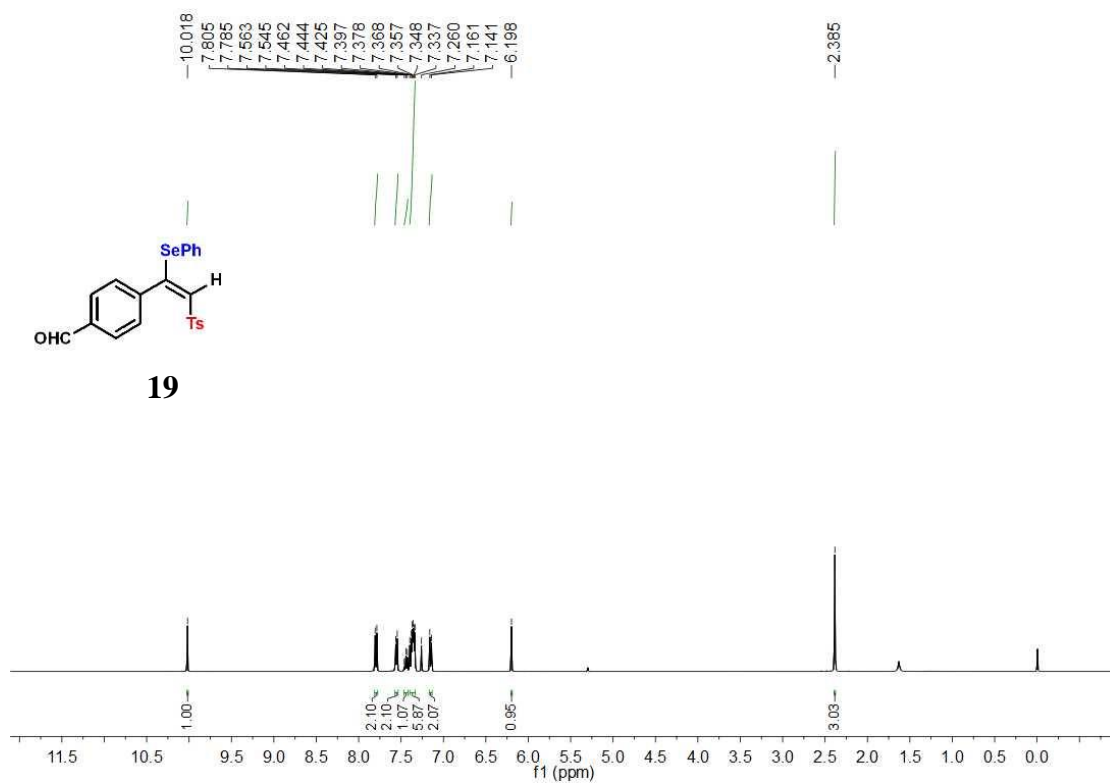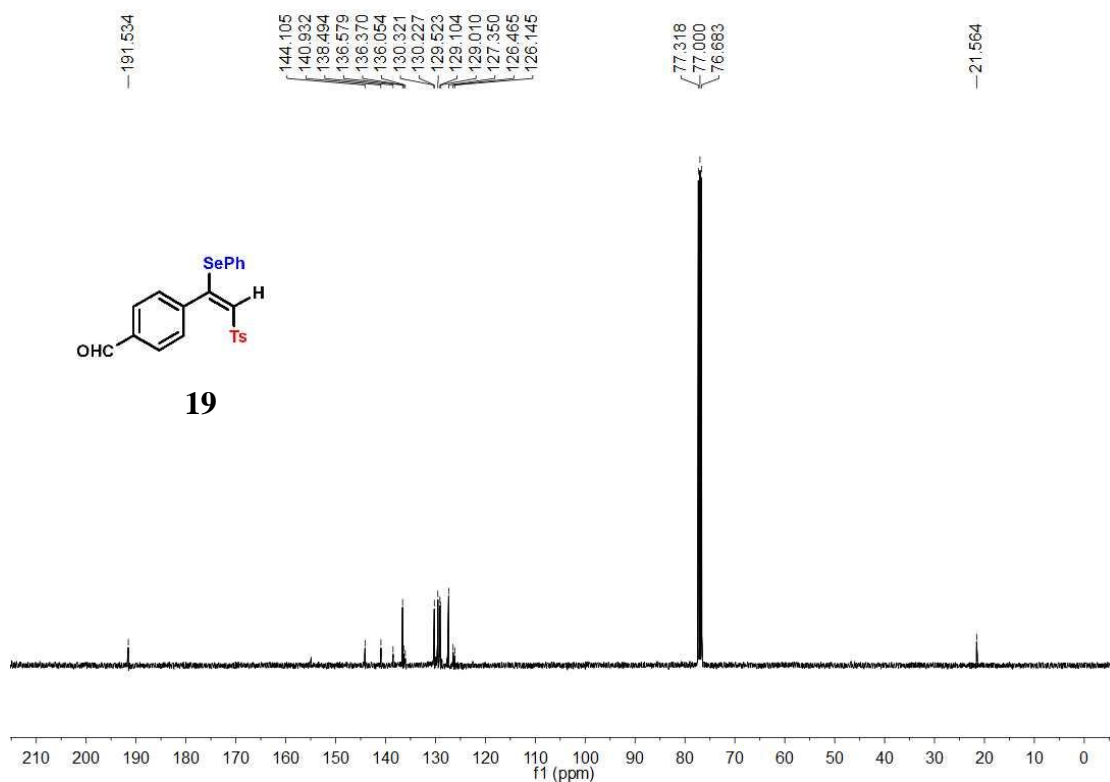

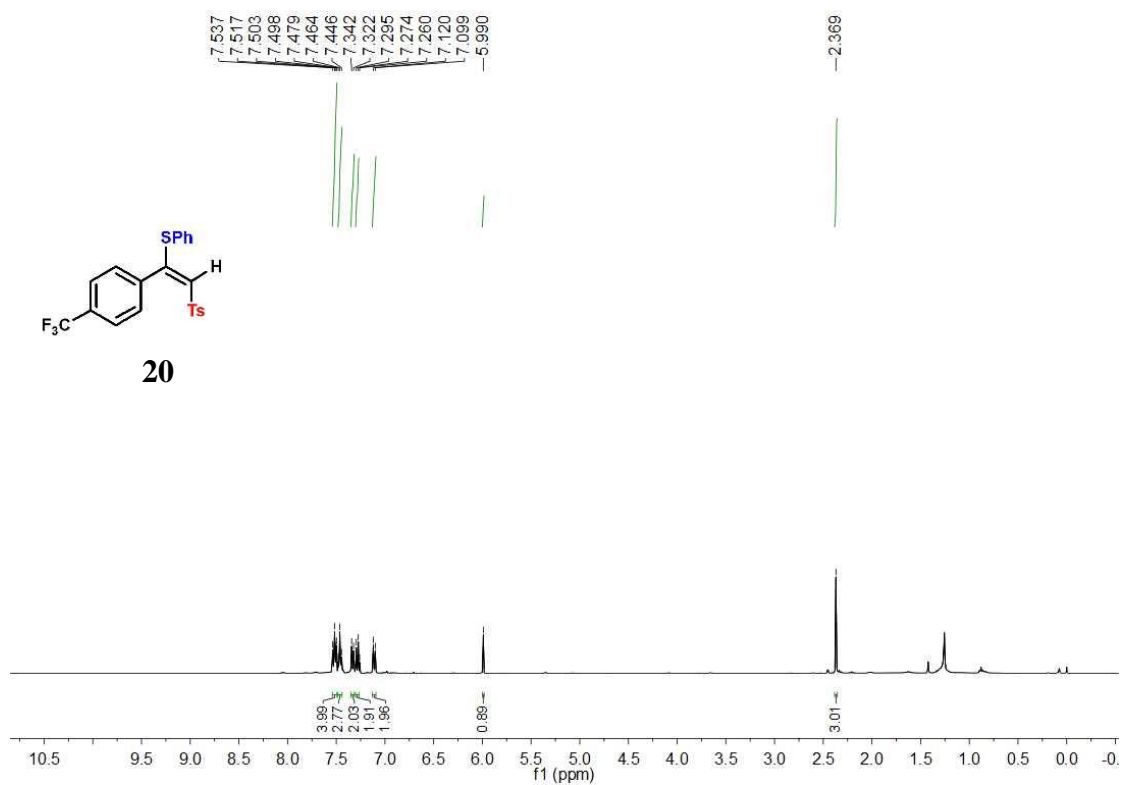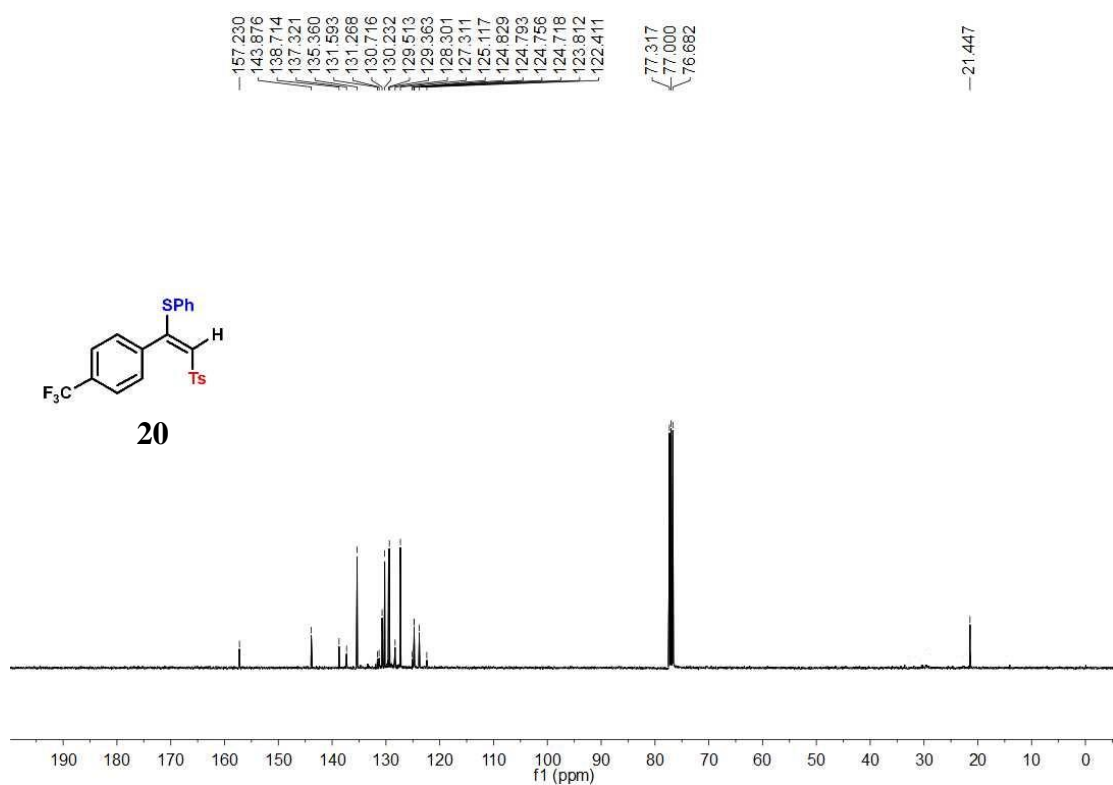



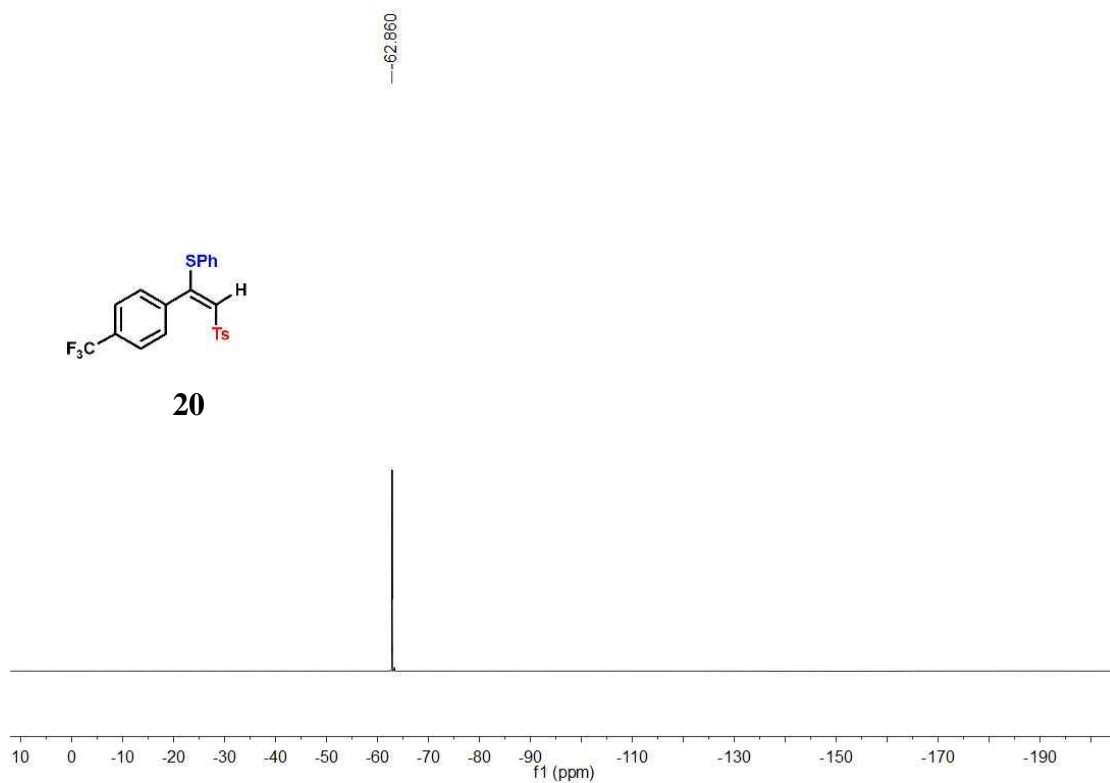

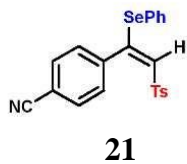

7.569  
7.548  
7.534  
7.517  
7.514  
7.460  
7.442  
7.423  
7.389  
7.370  
7.357  
7.353  
7.336  
7.301  
7.280  
7.260  
7.188  
6.207

7.569  
7.548  
7.534  
7.517  
7.514  
7.442  
7.423  
7.389  
7.370  
7.357  
7.353  
7.336  
7.301  
7.280  
7.188  
7.168

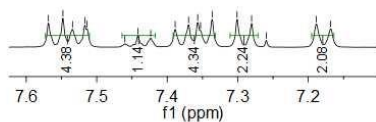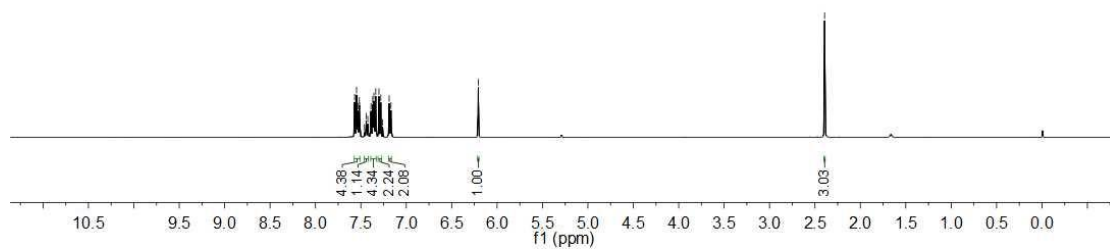

153.856  
144.238  
138.589  
136.498  
131.446  
130.358  
130.209  
129.562  
129.114  
128.266  
112.774  
77.317  
77.000  
76.682  
21.540

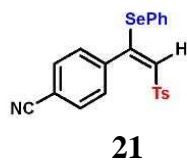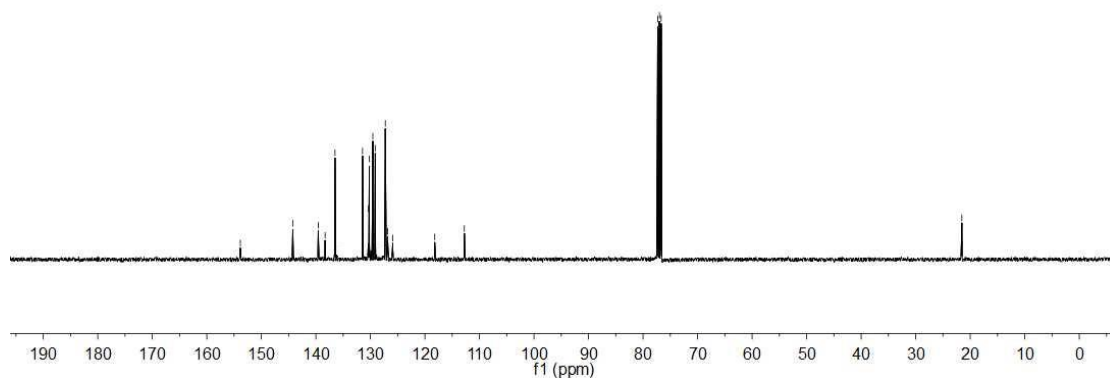

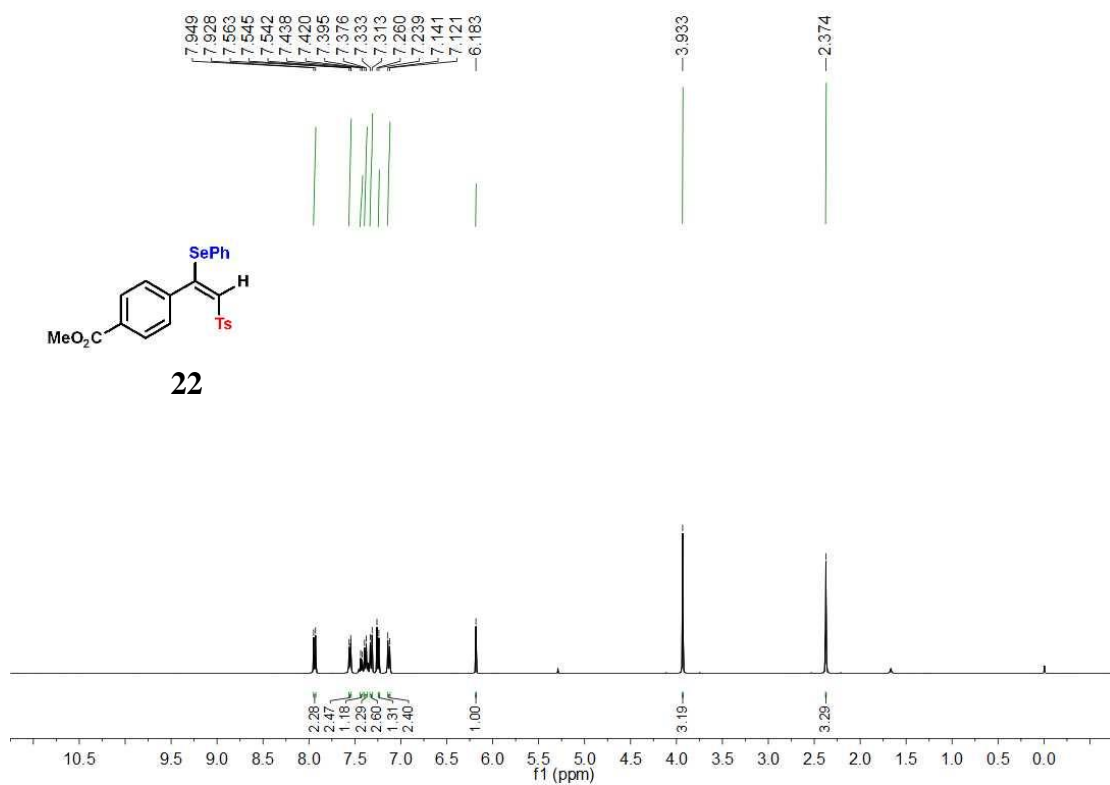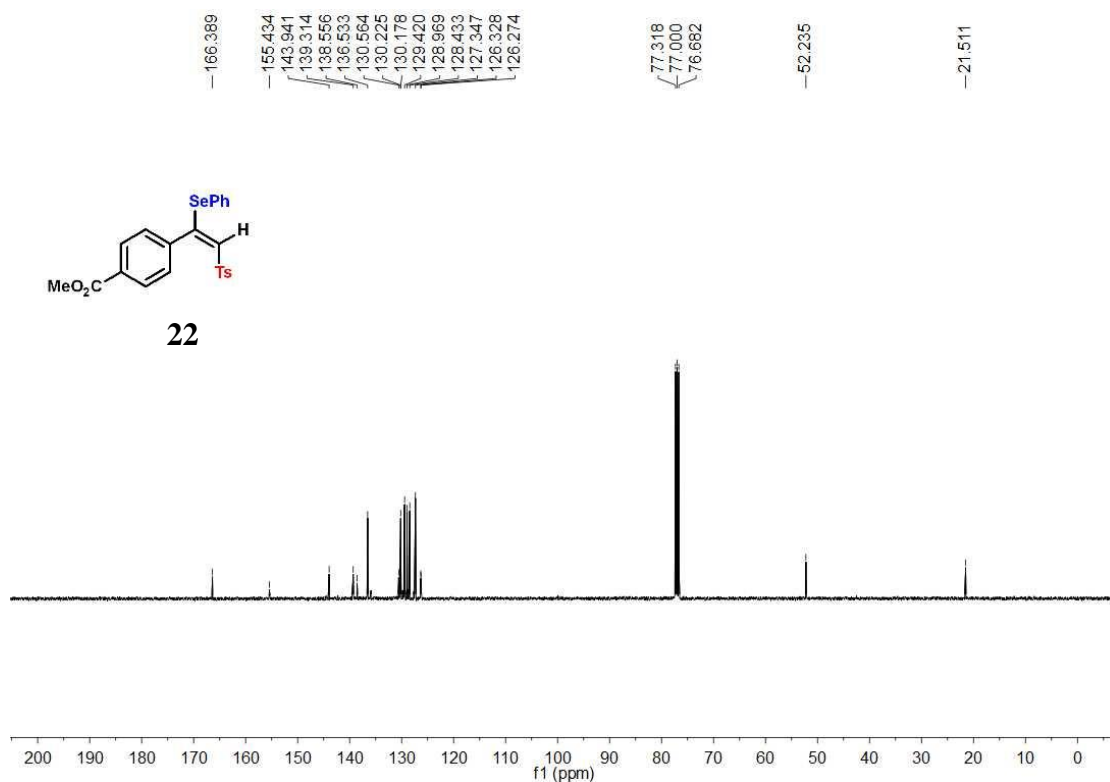

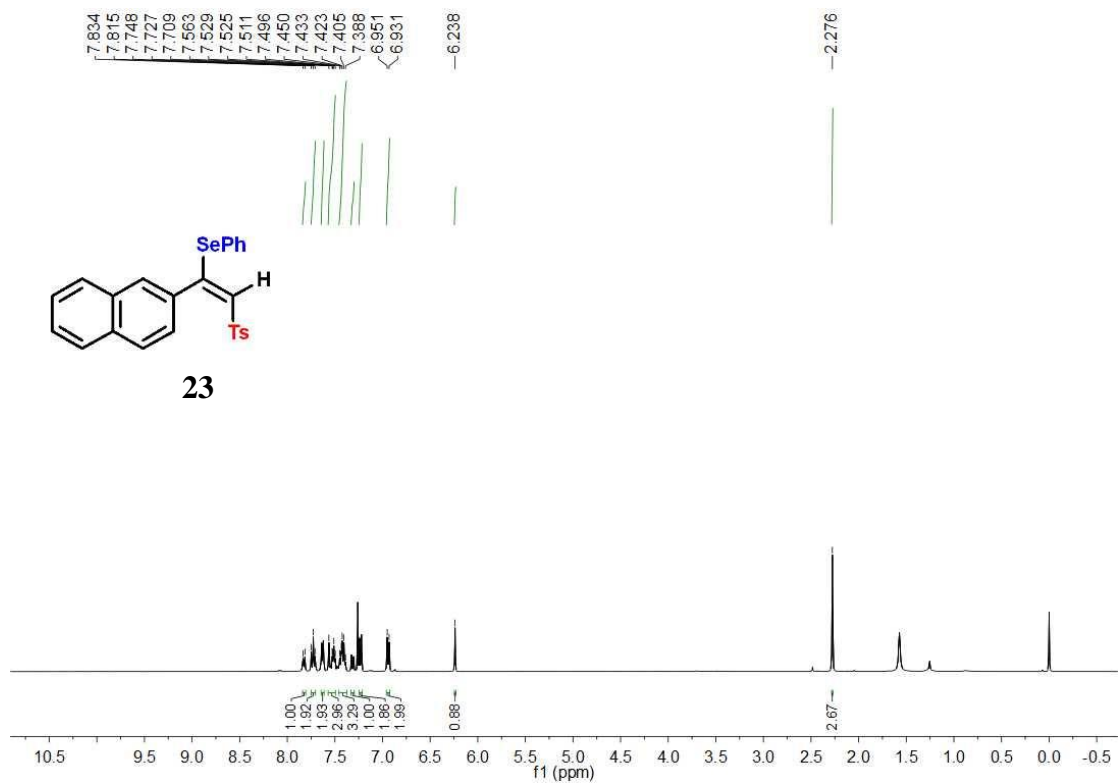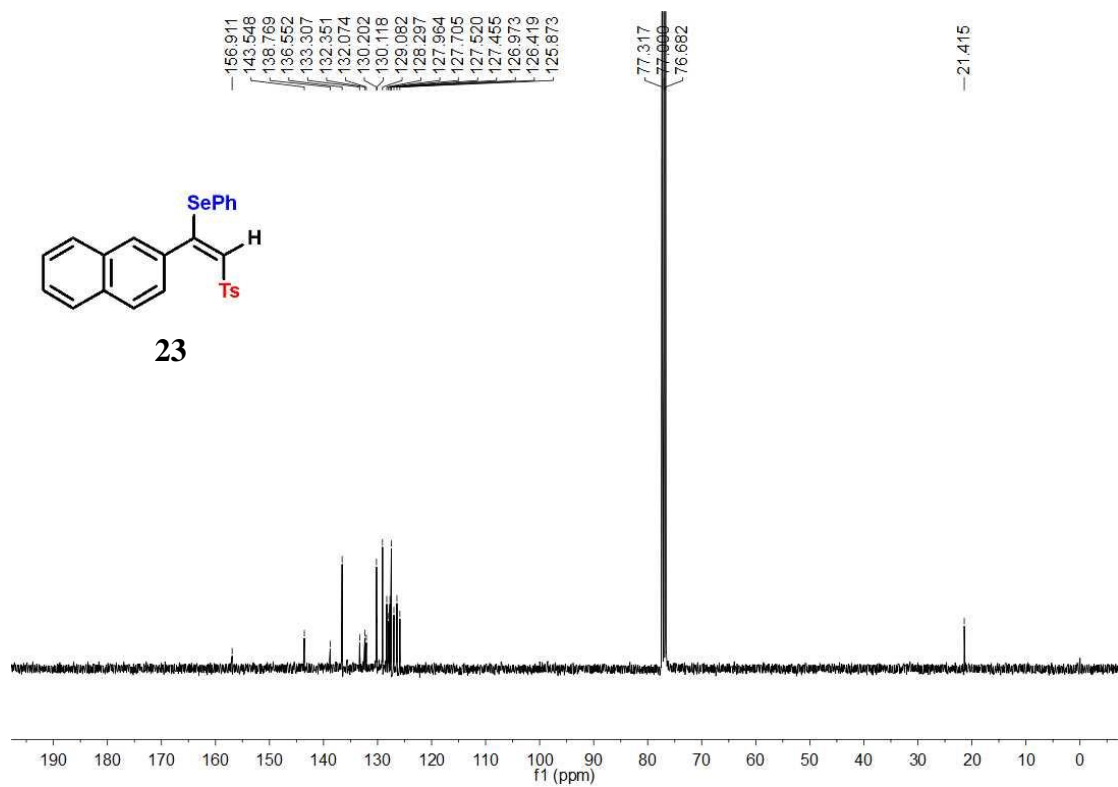

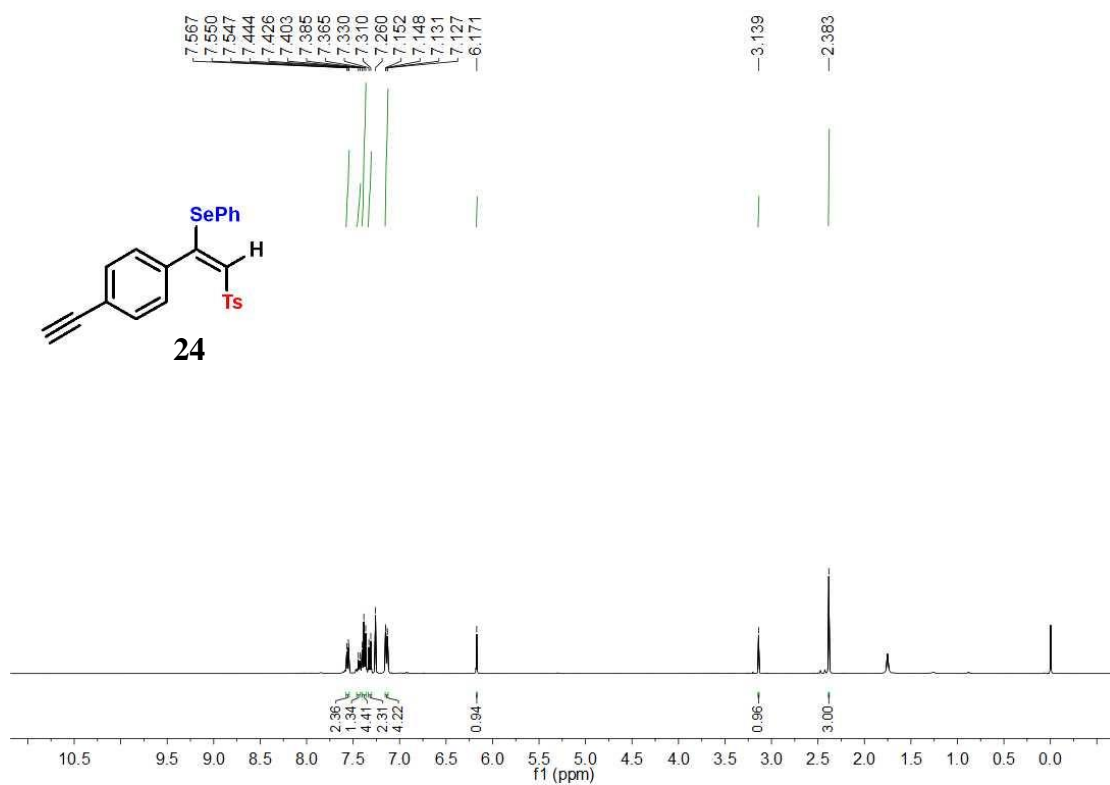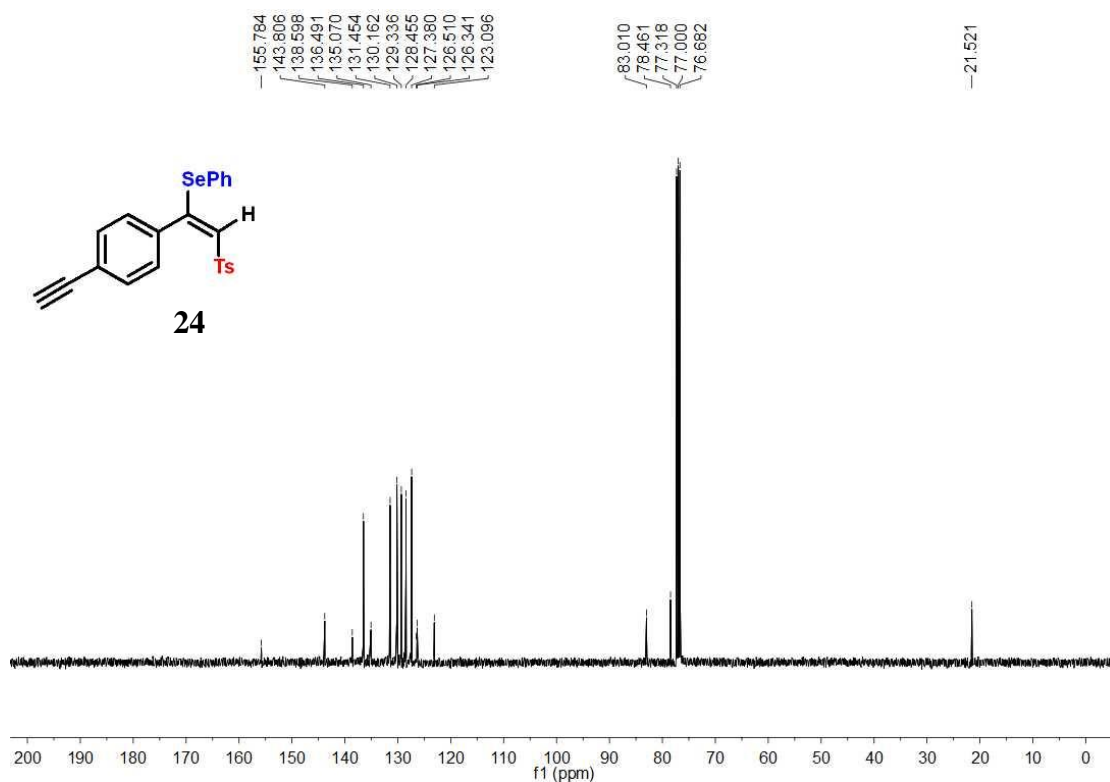

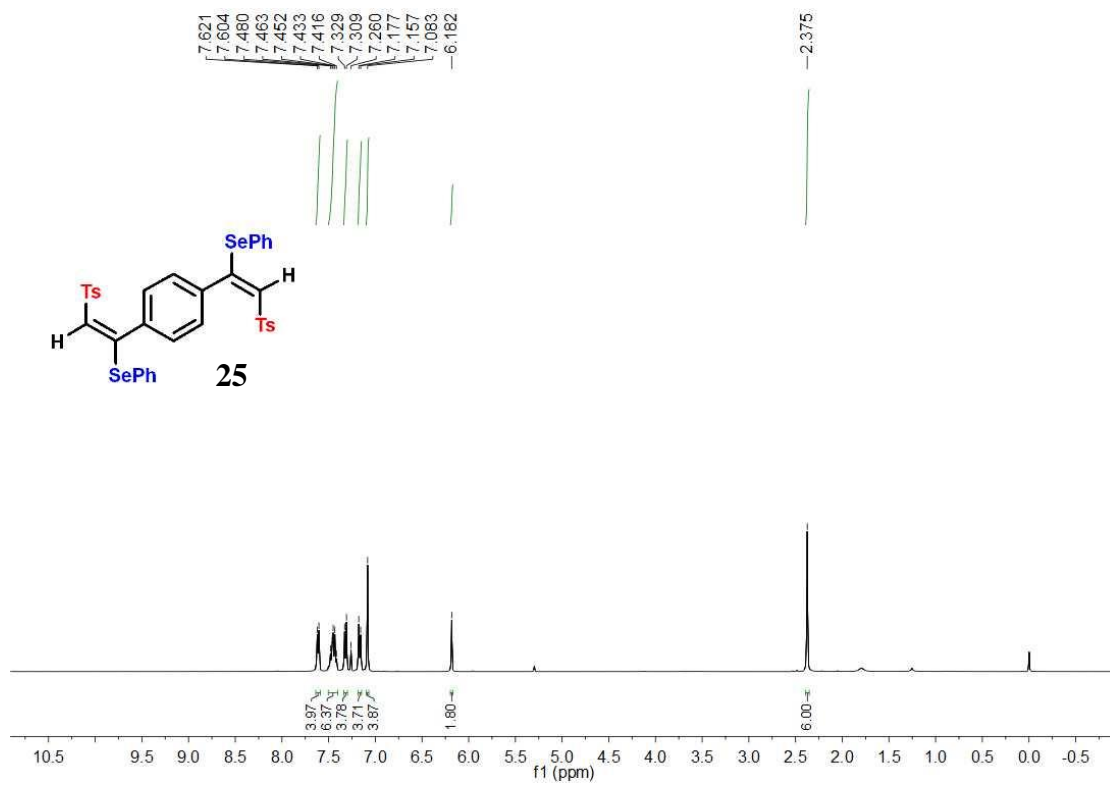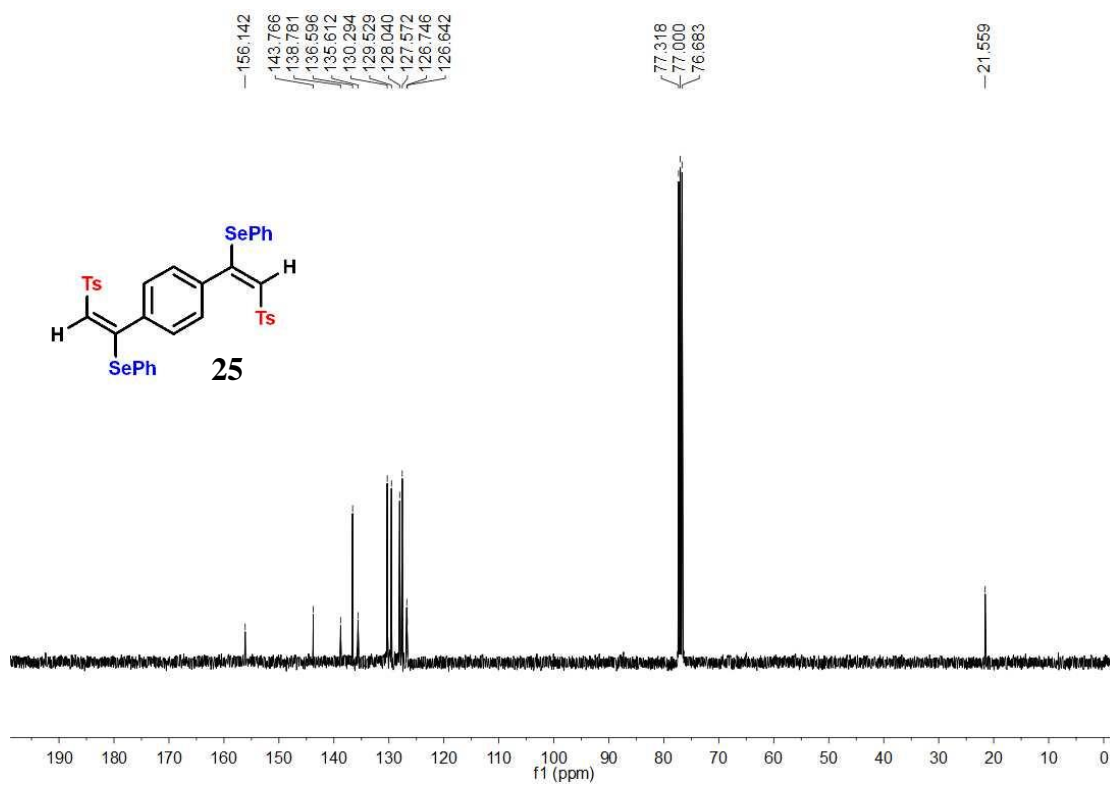

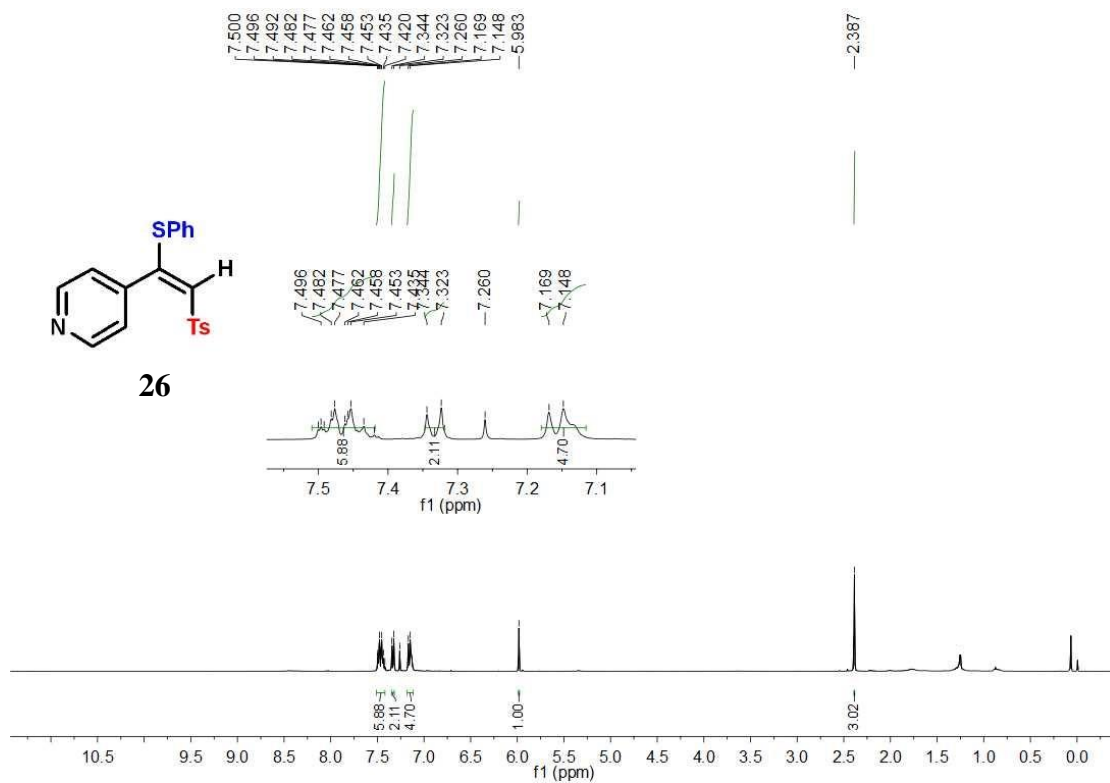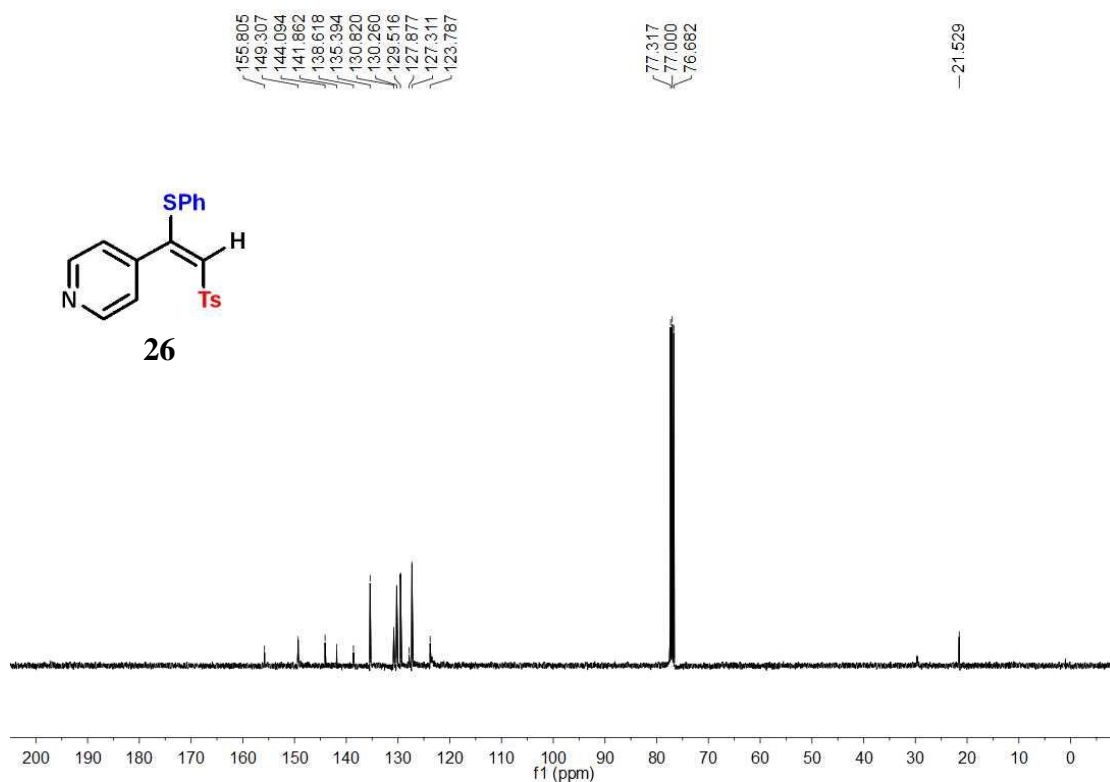

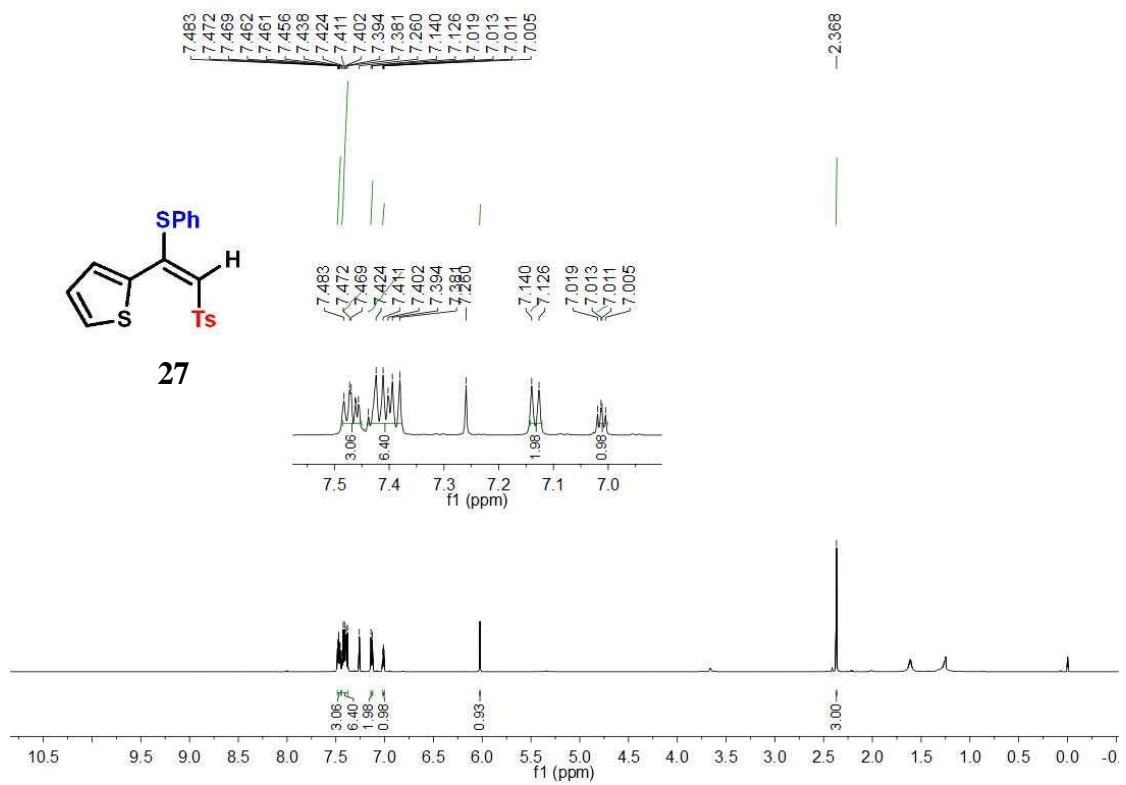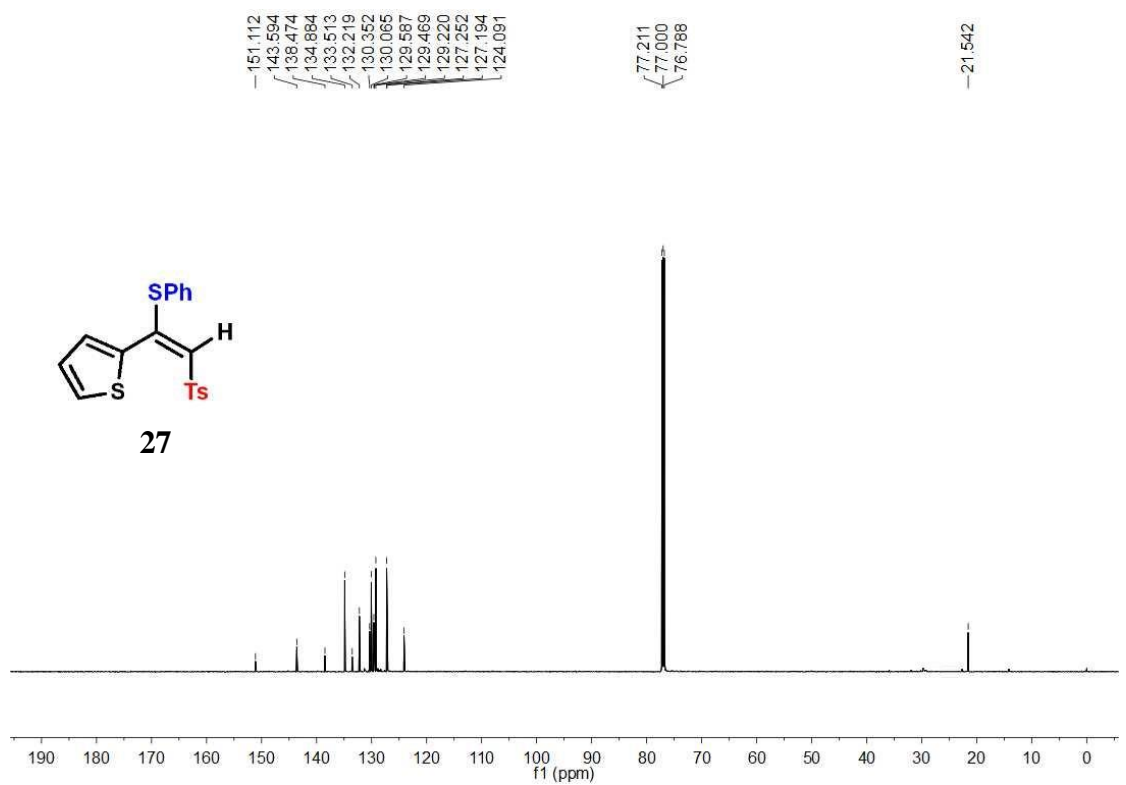



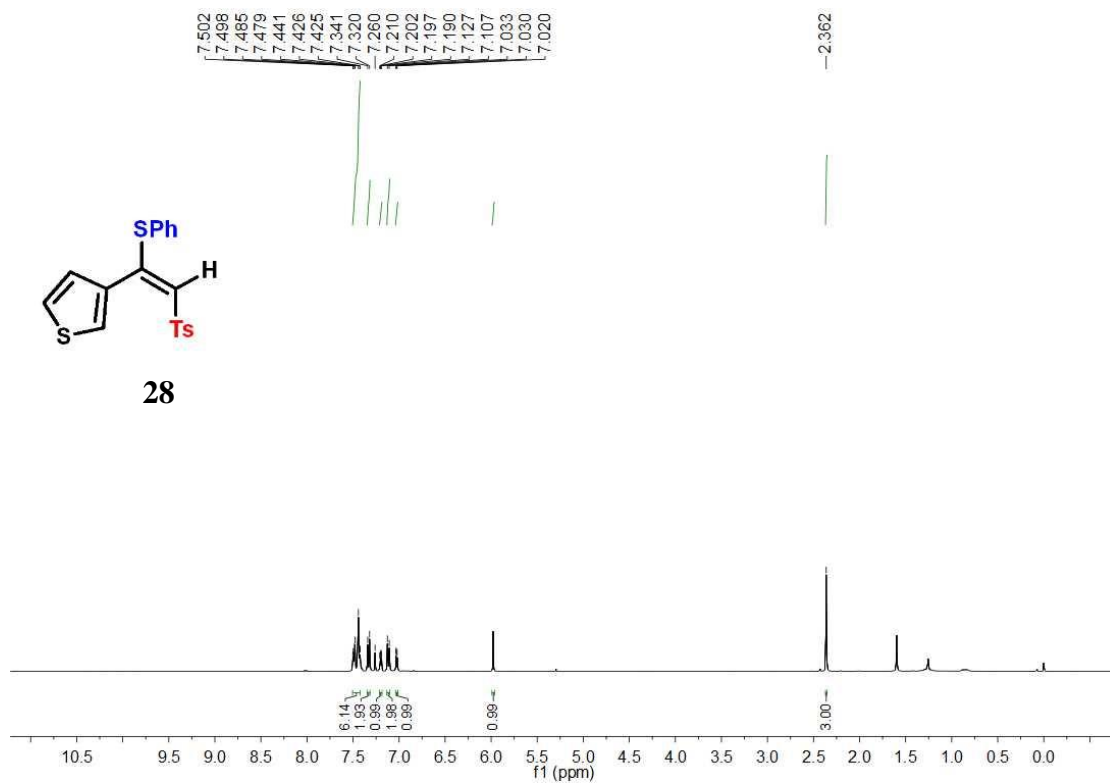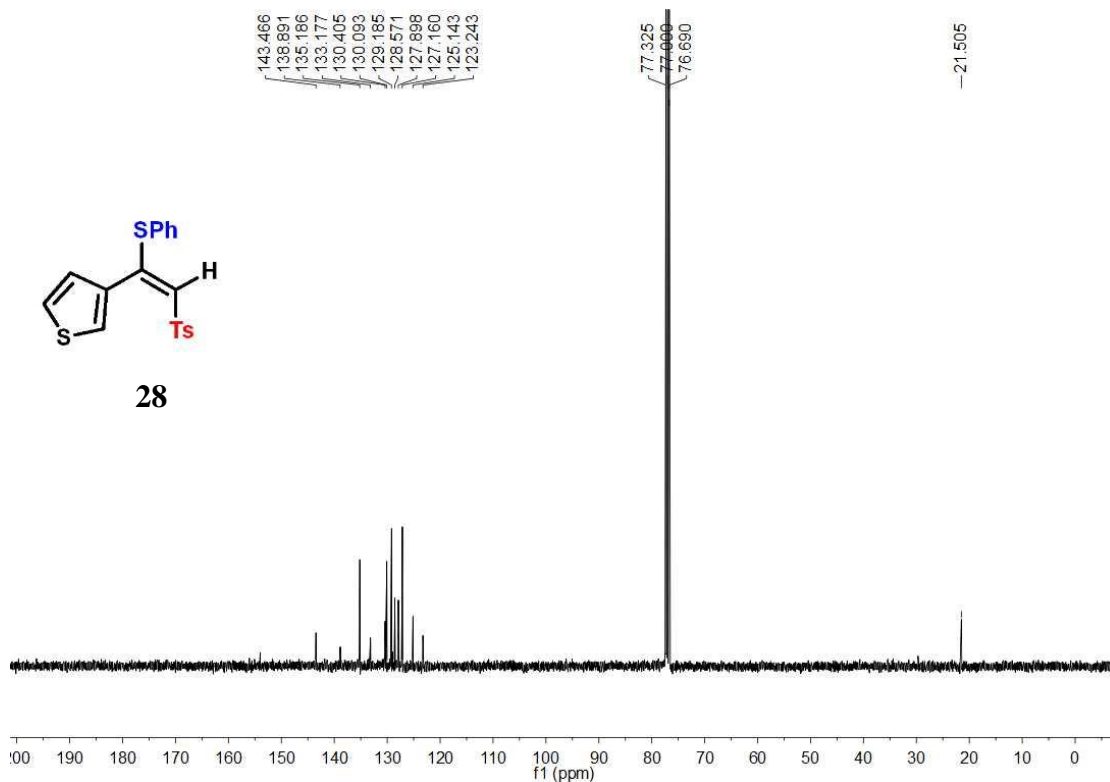

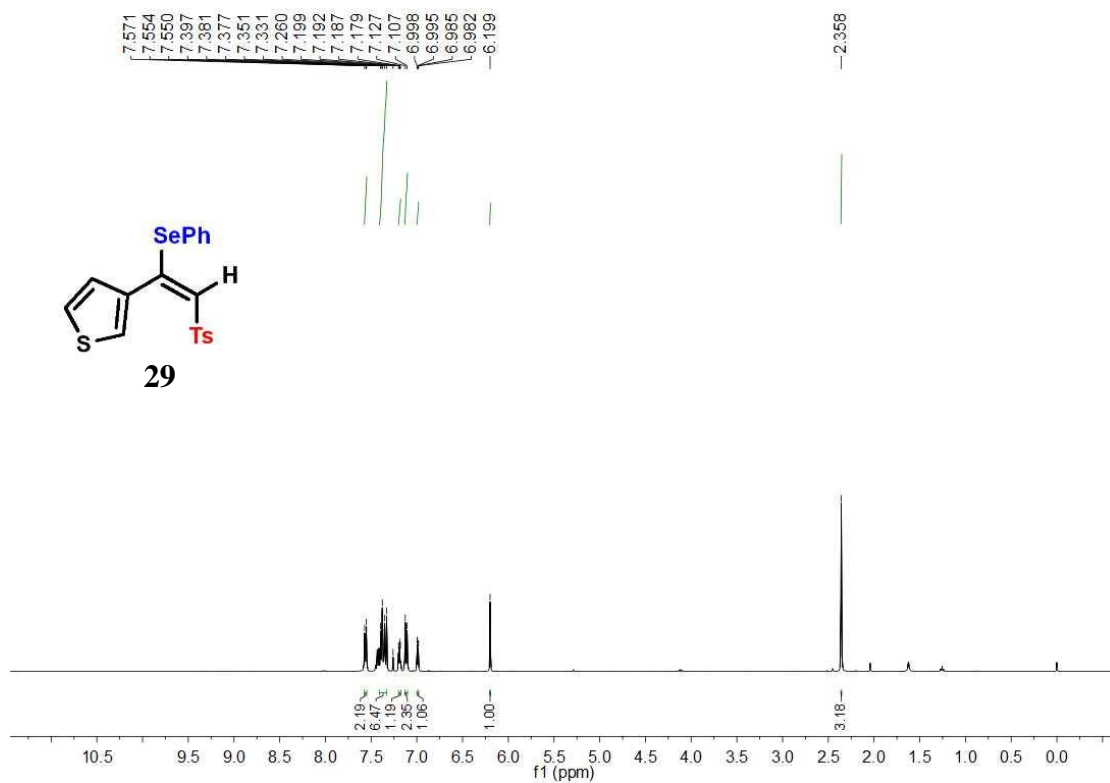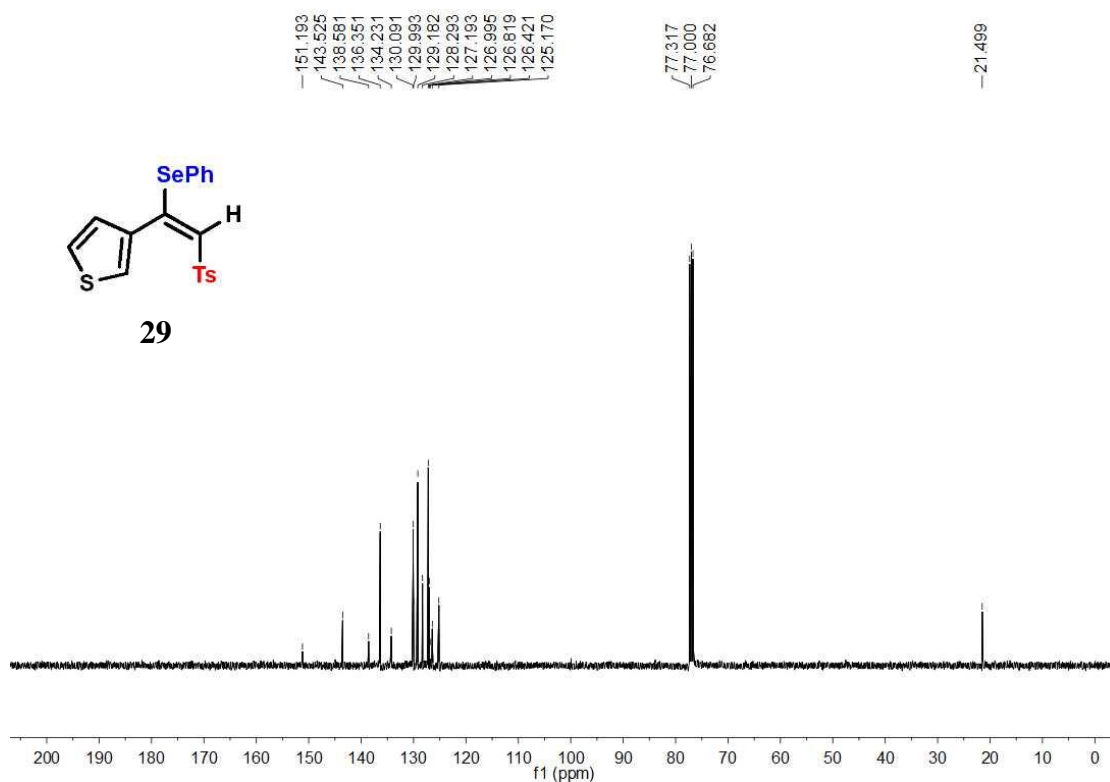

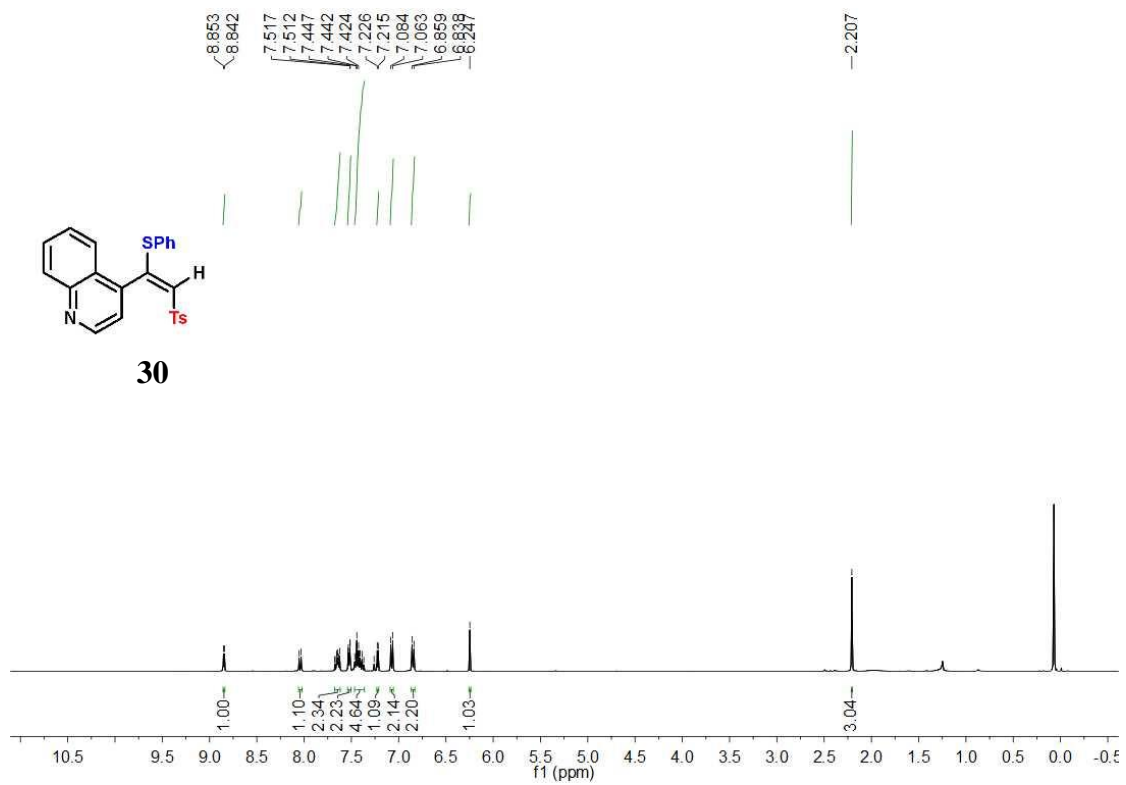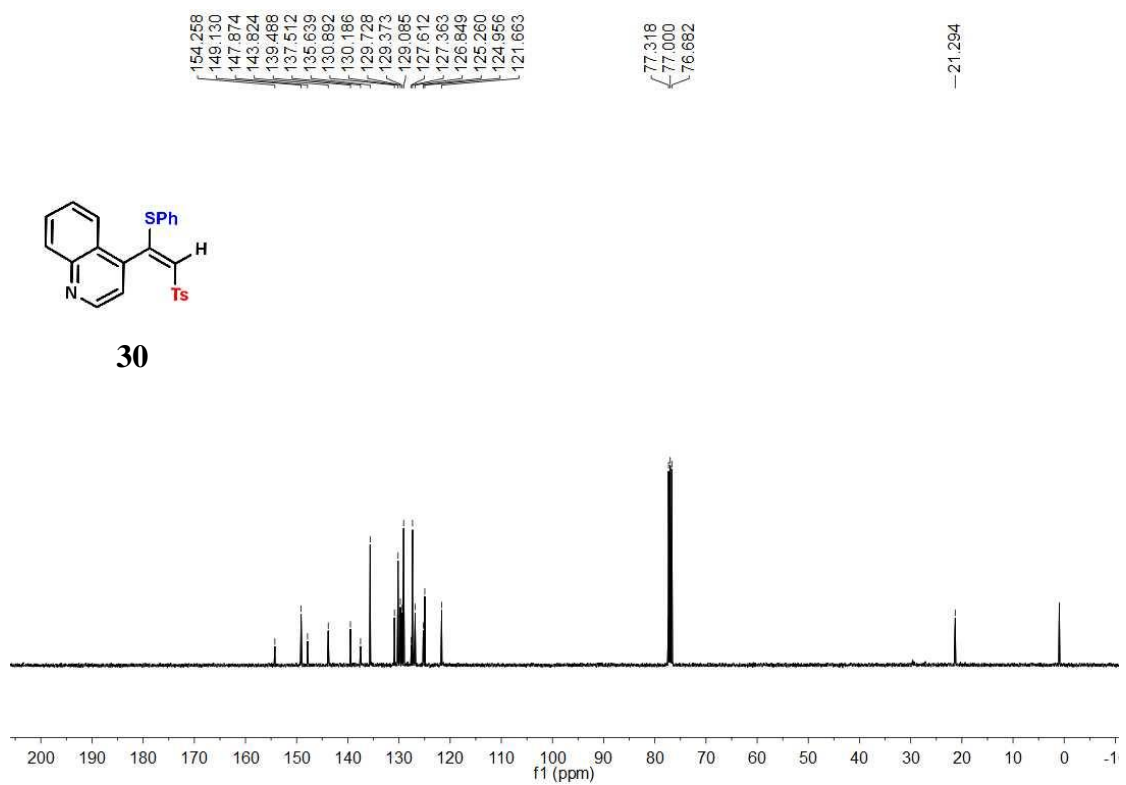

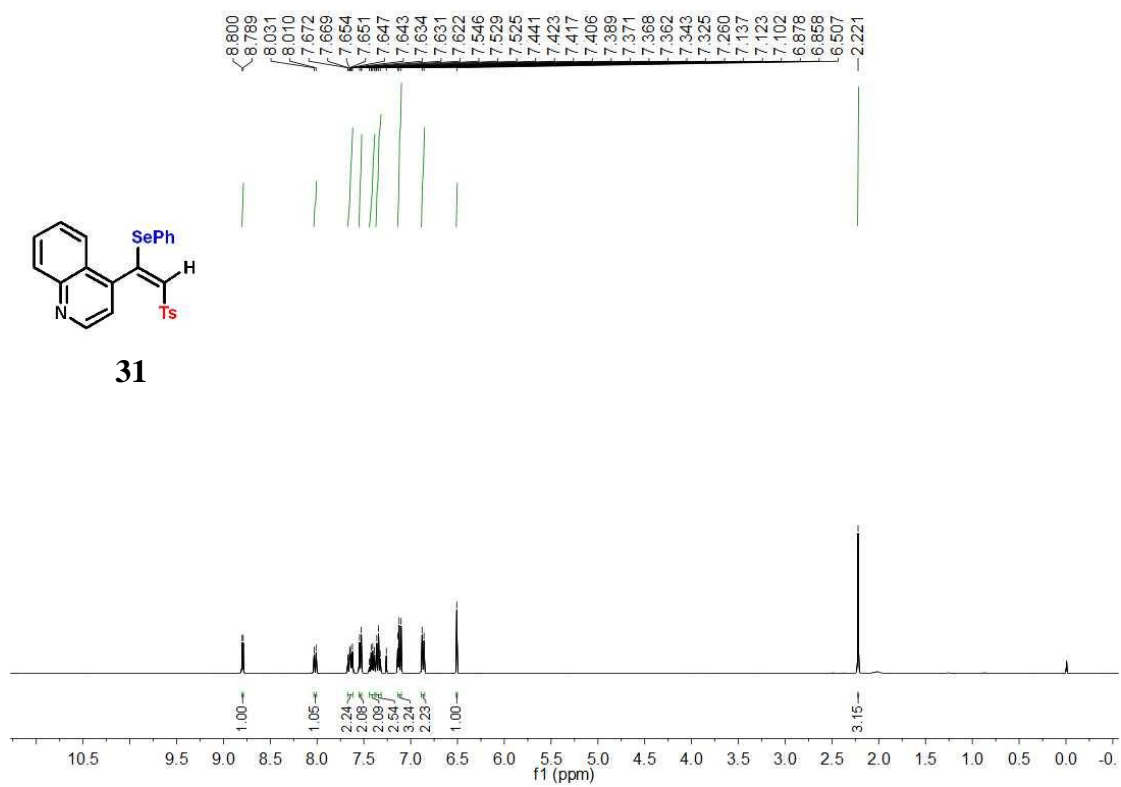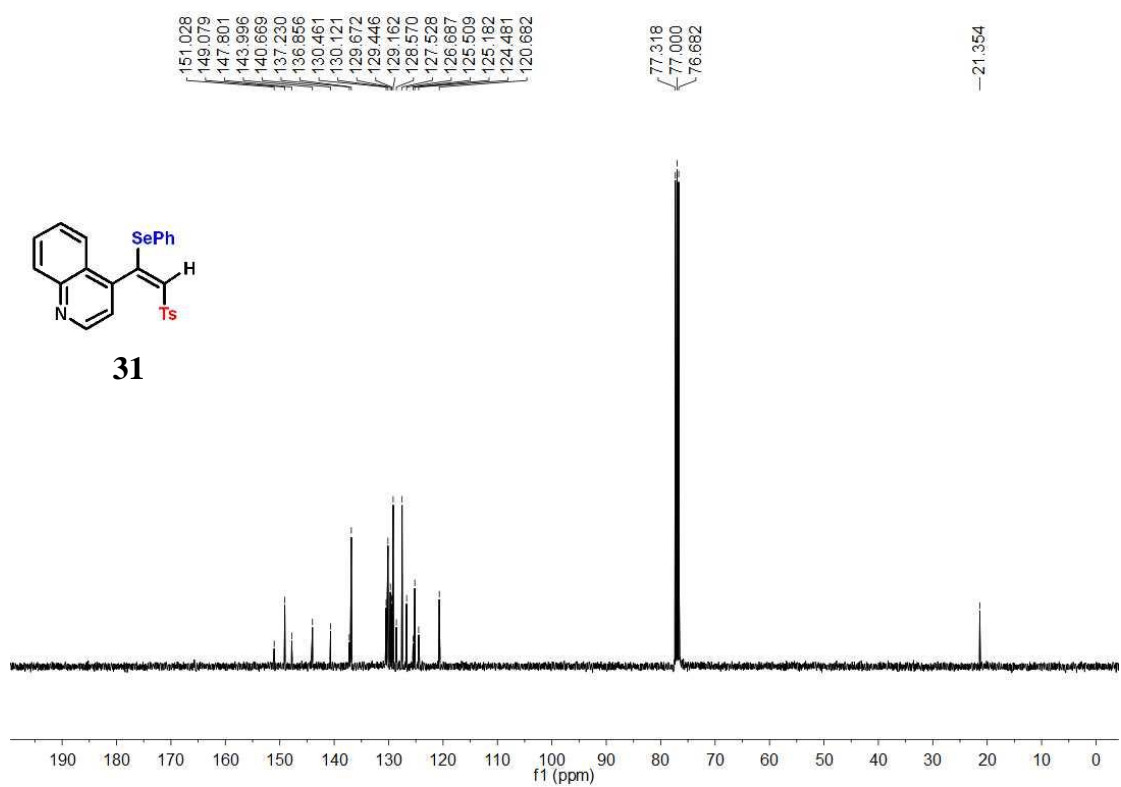

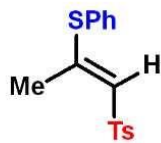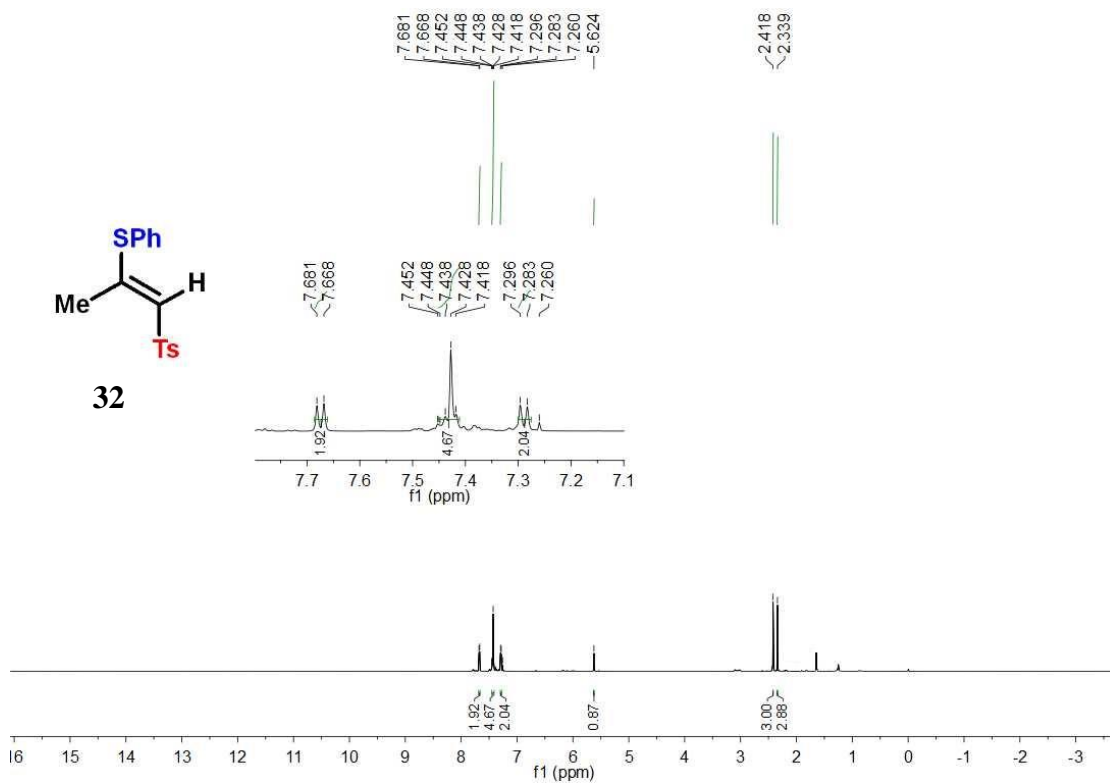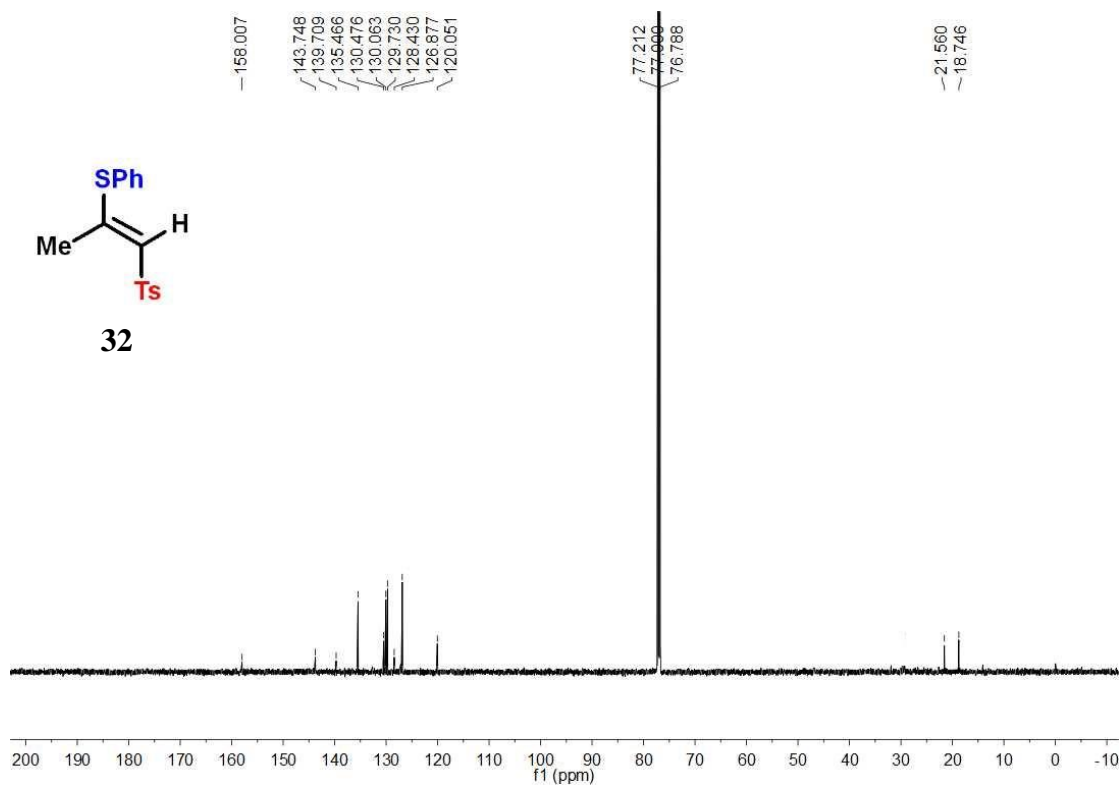

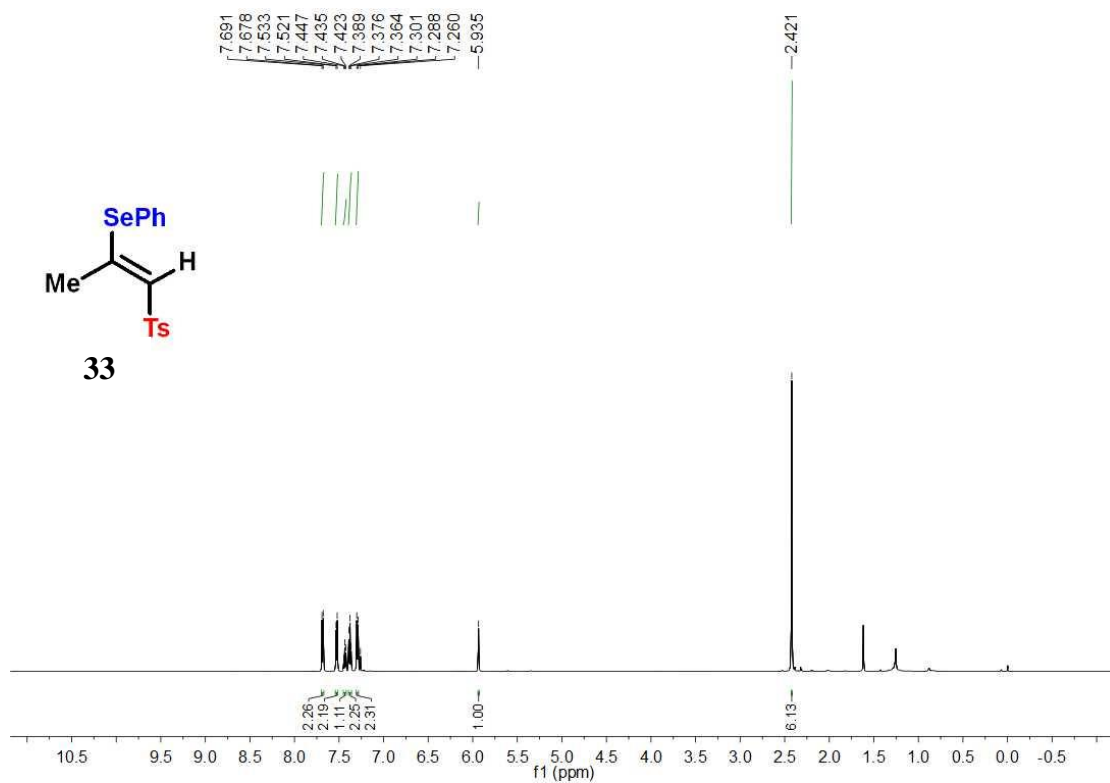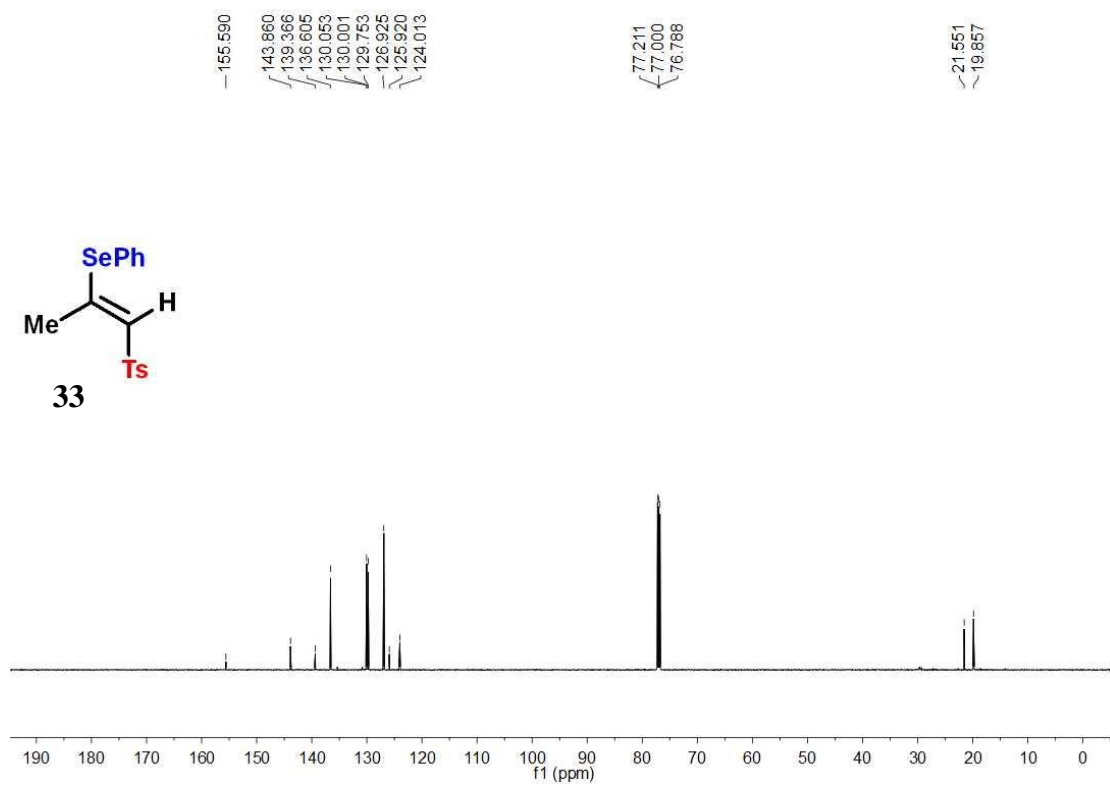

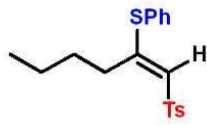

34

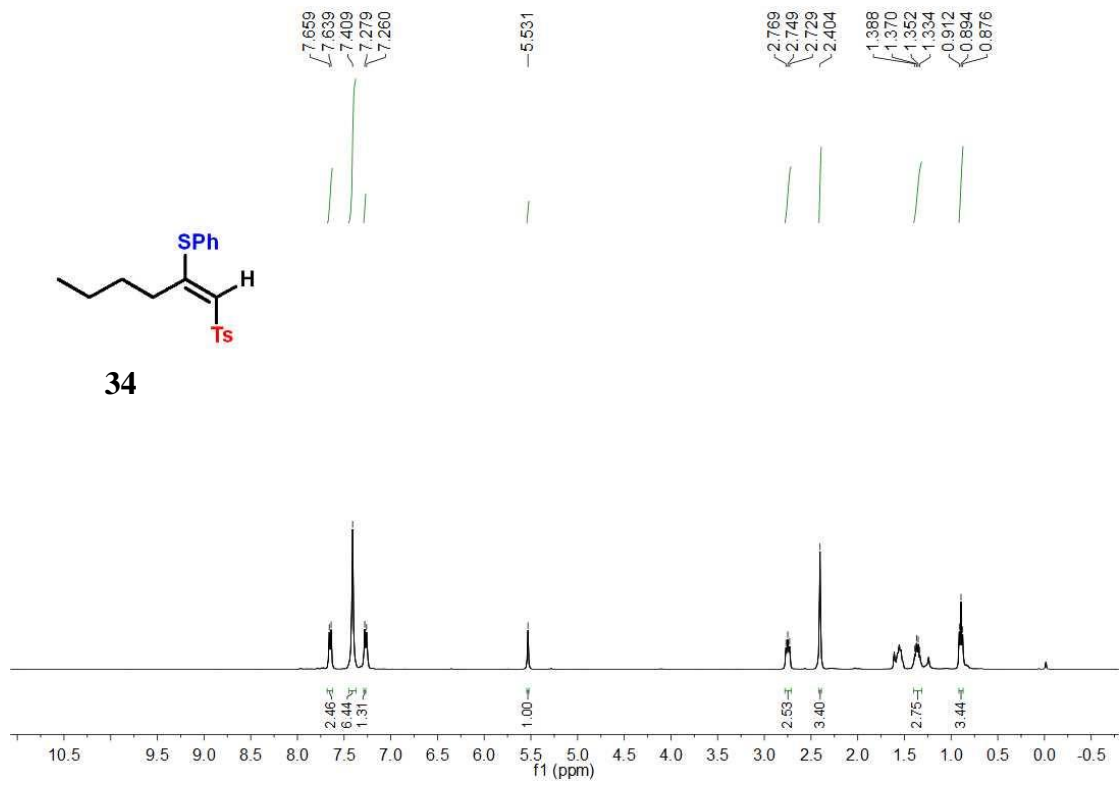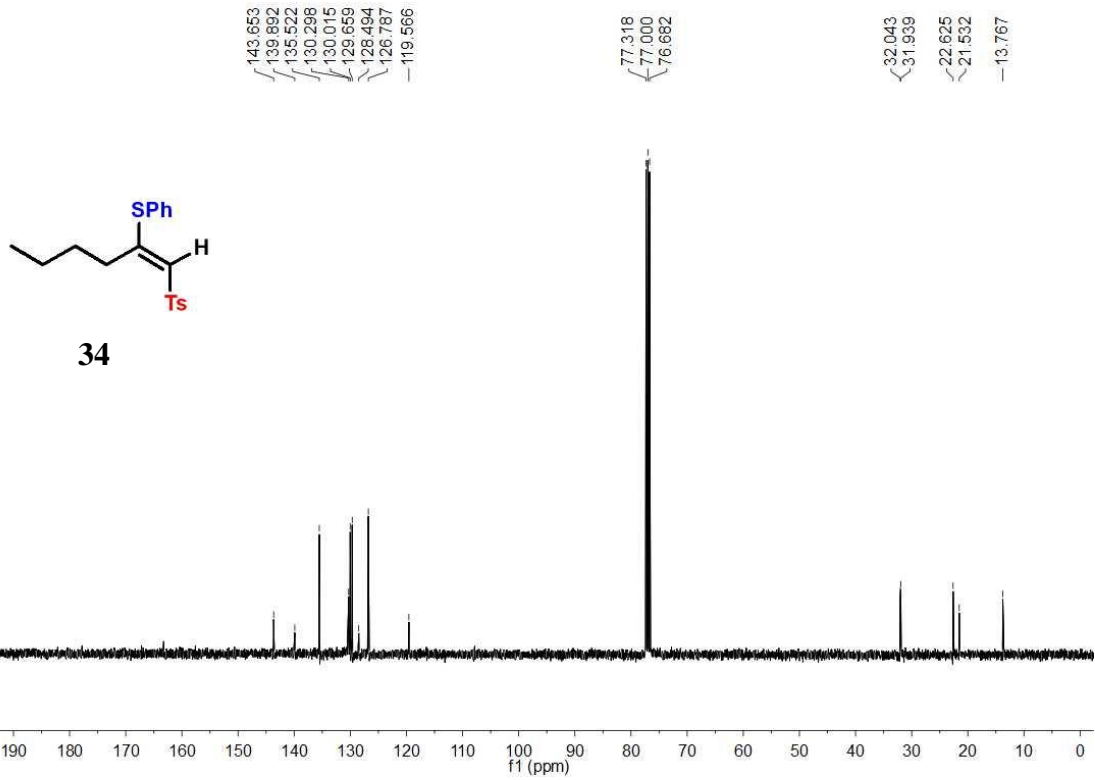

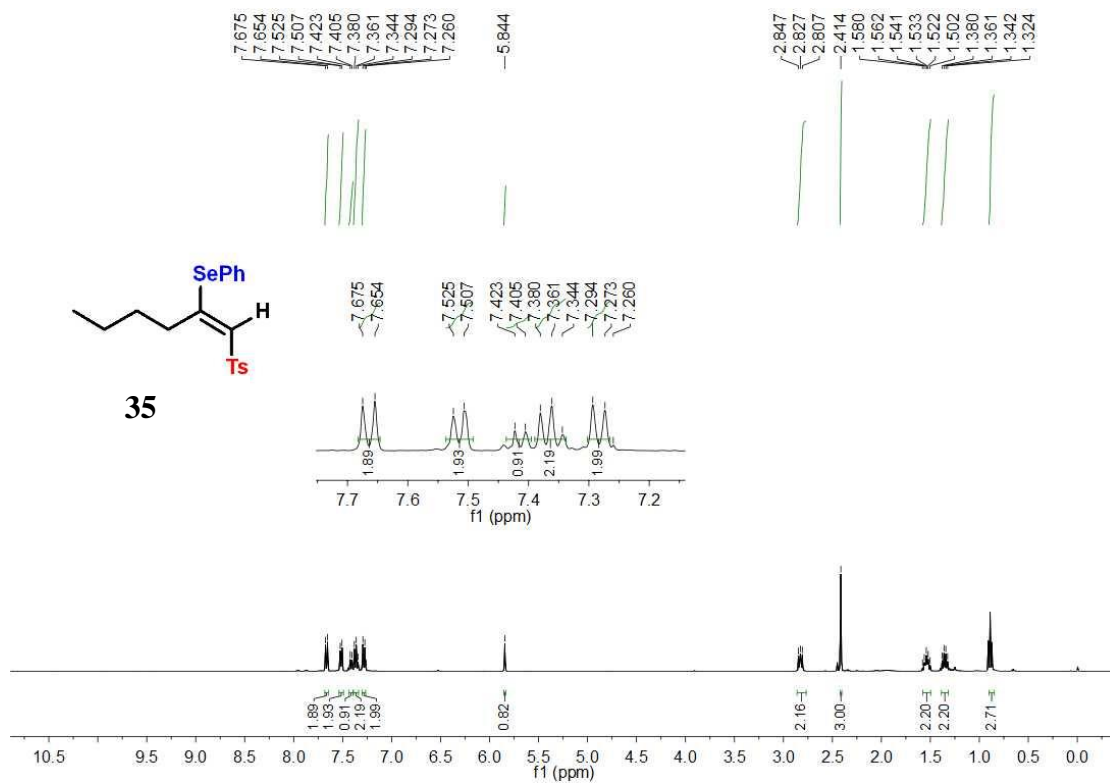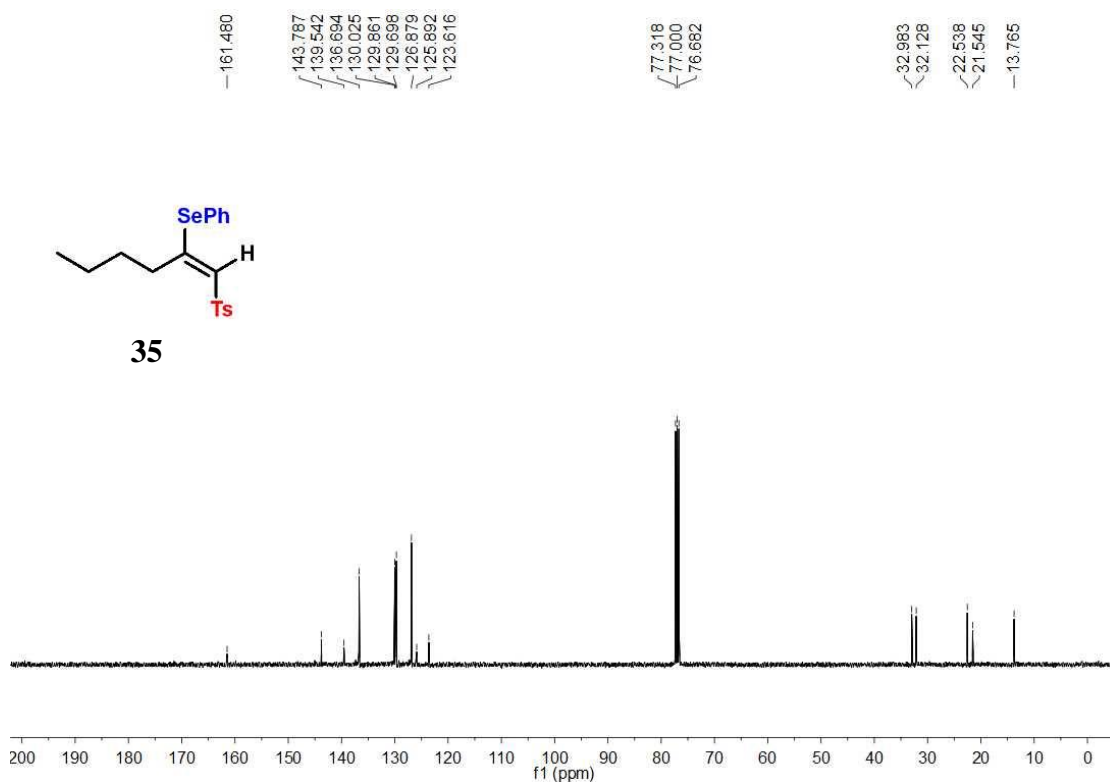



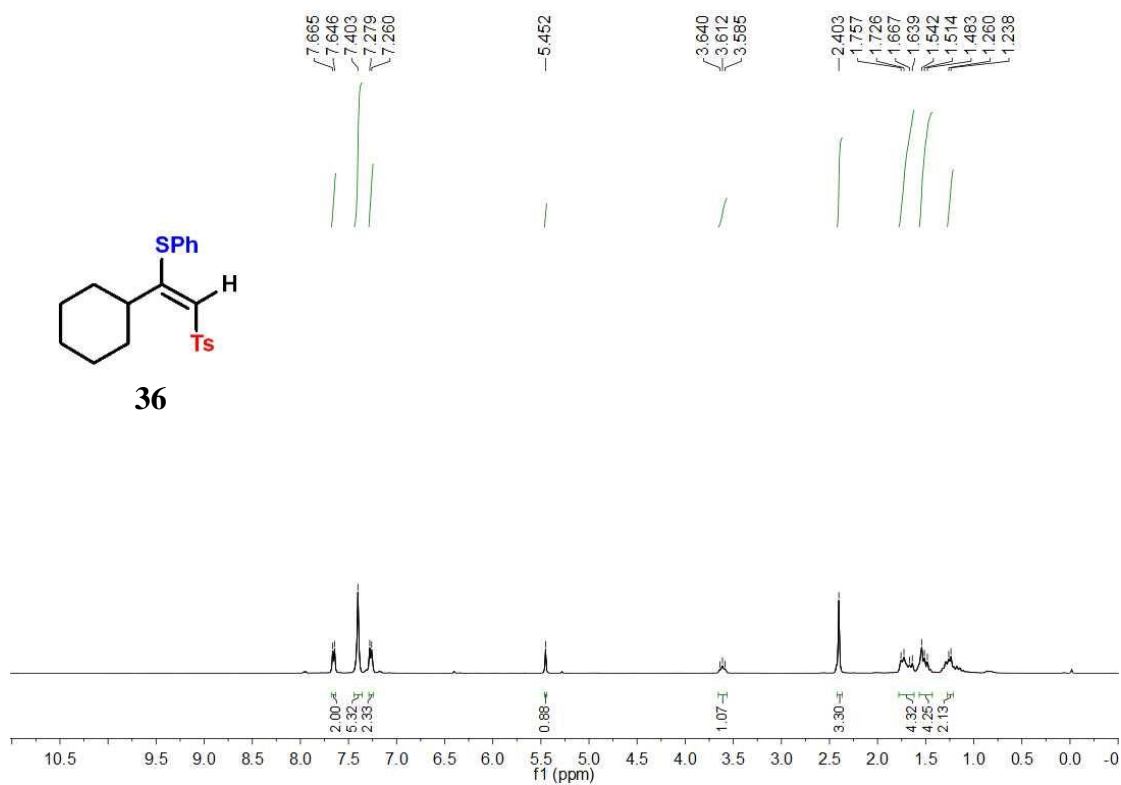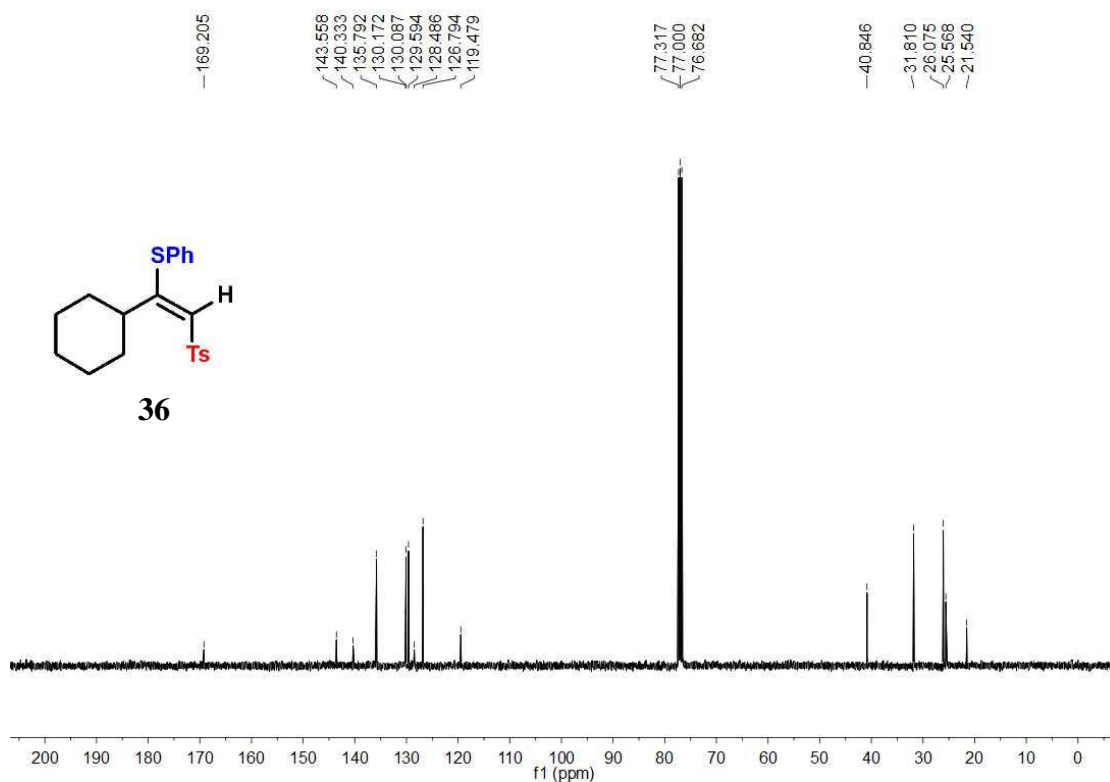

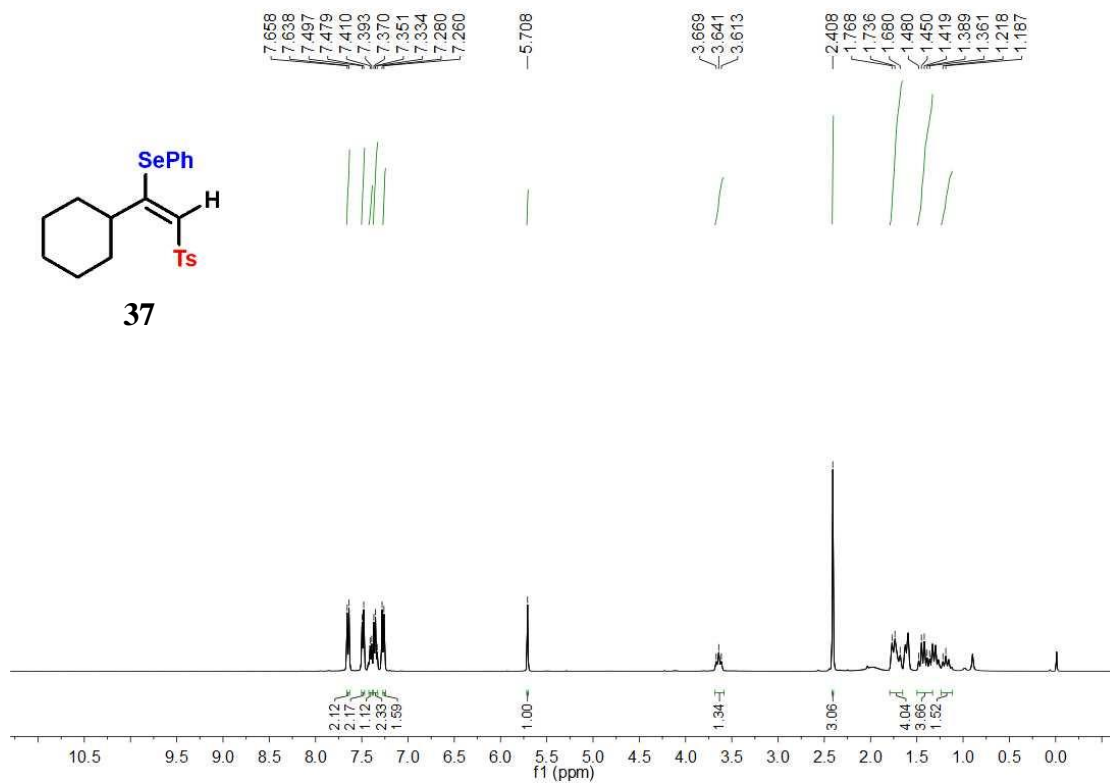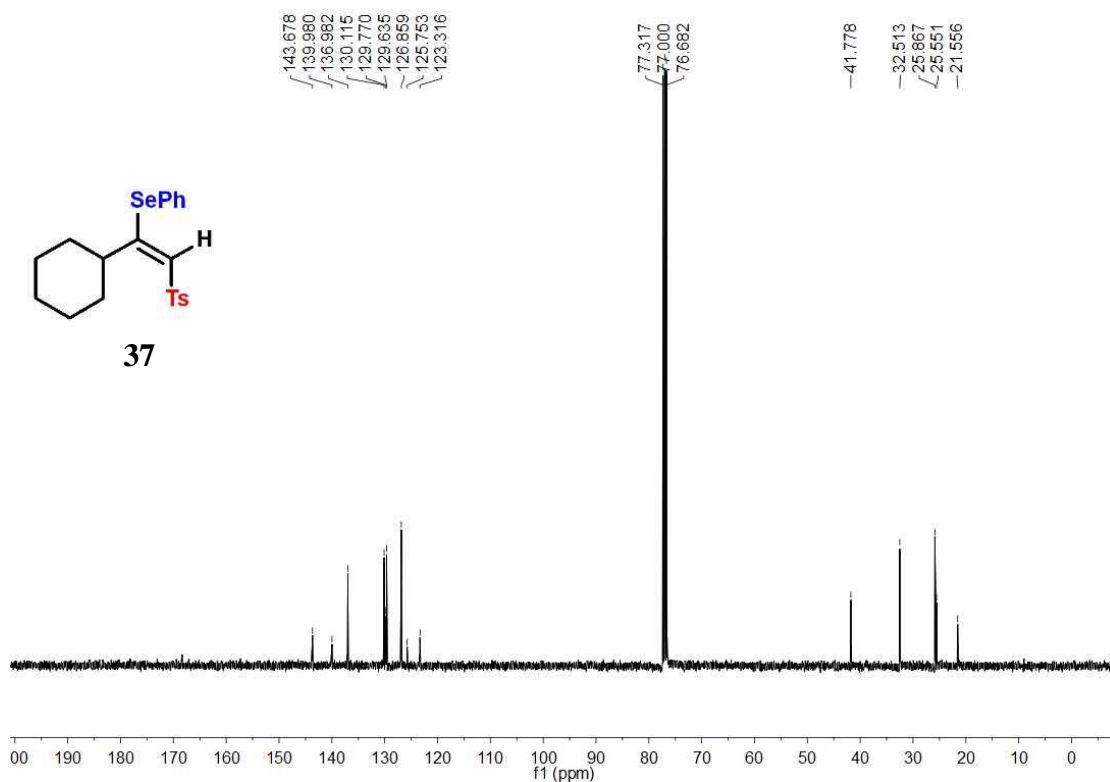

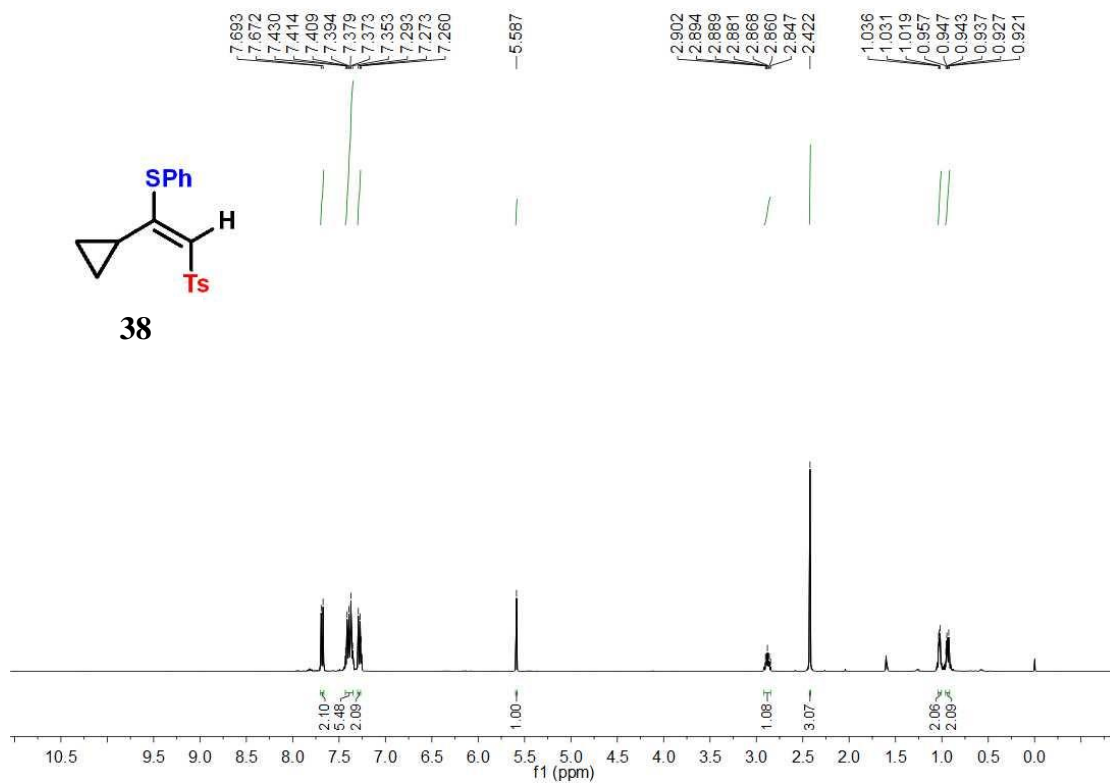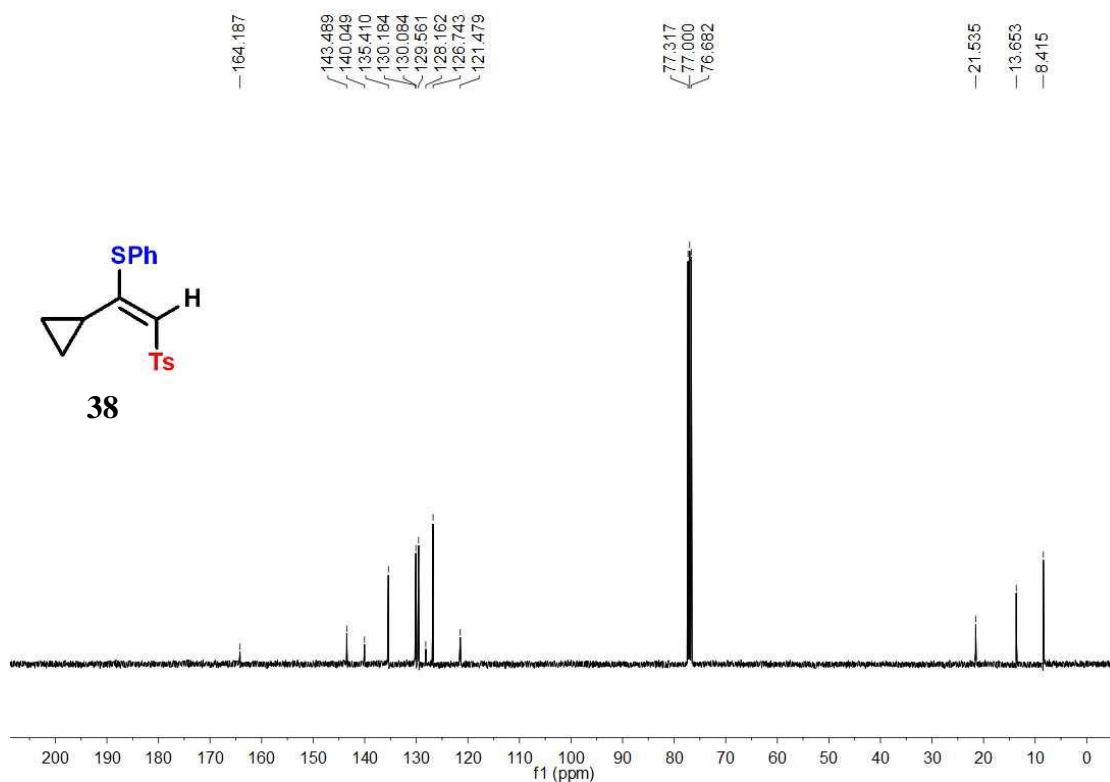

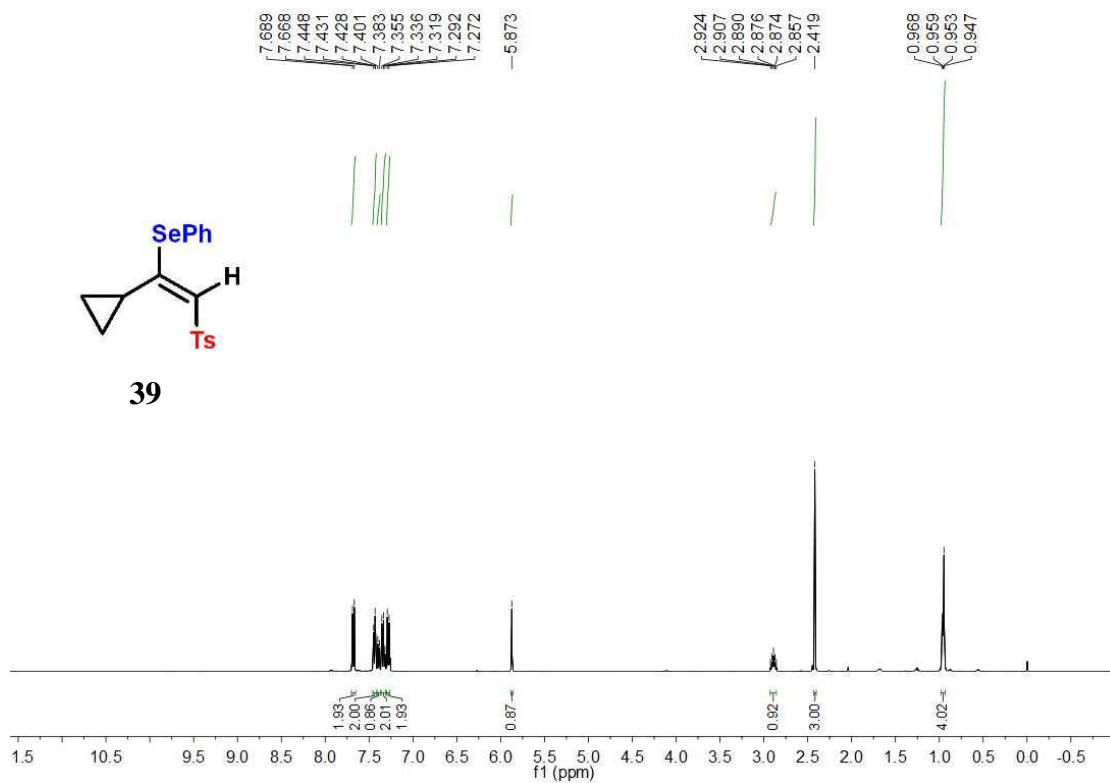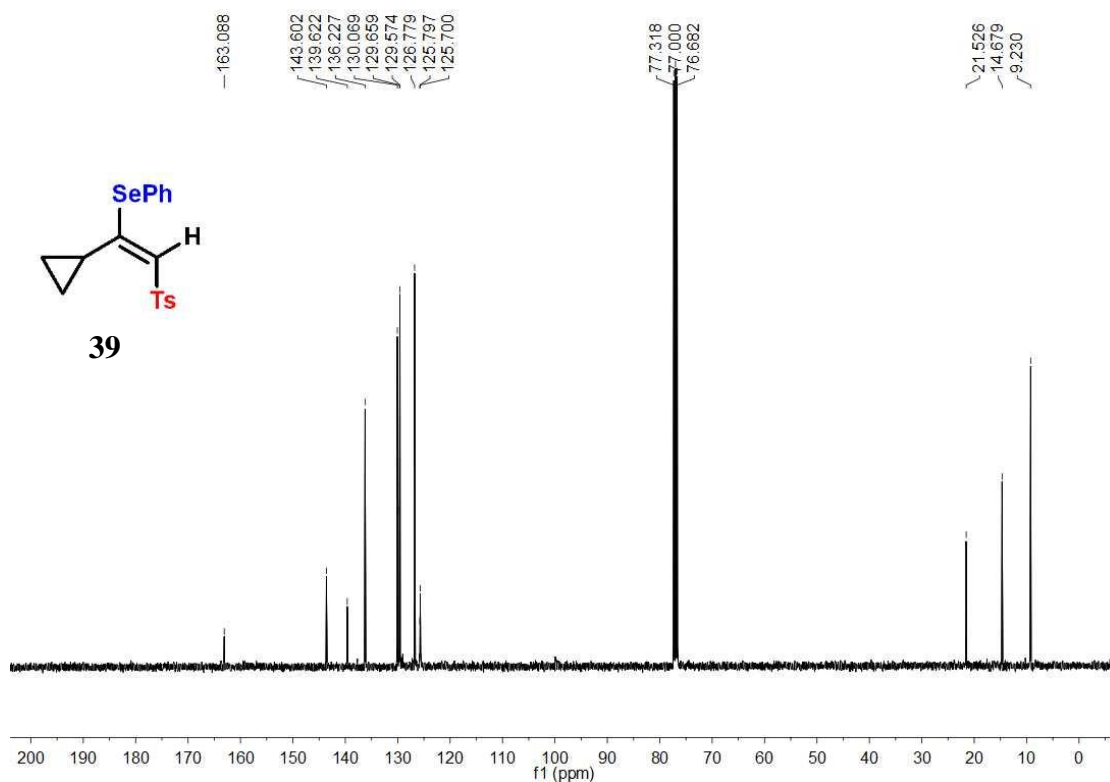

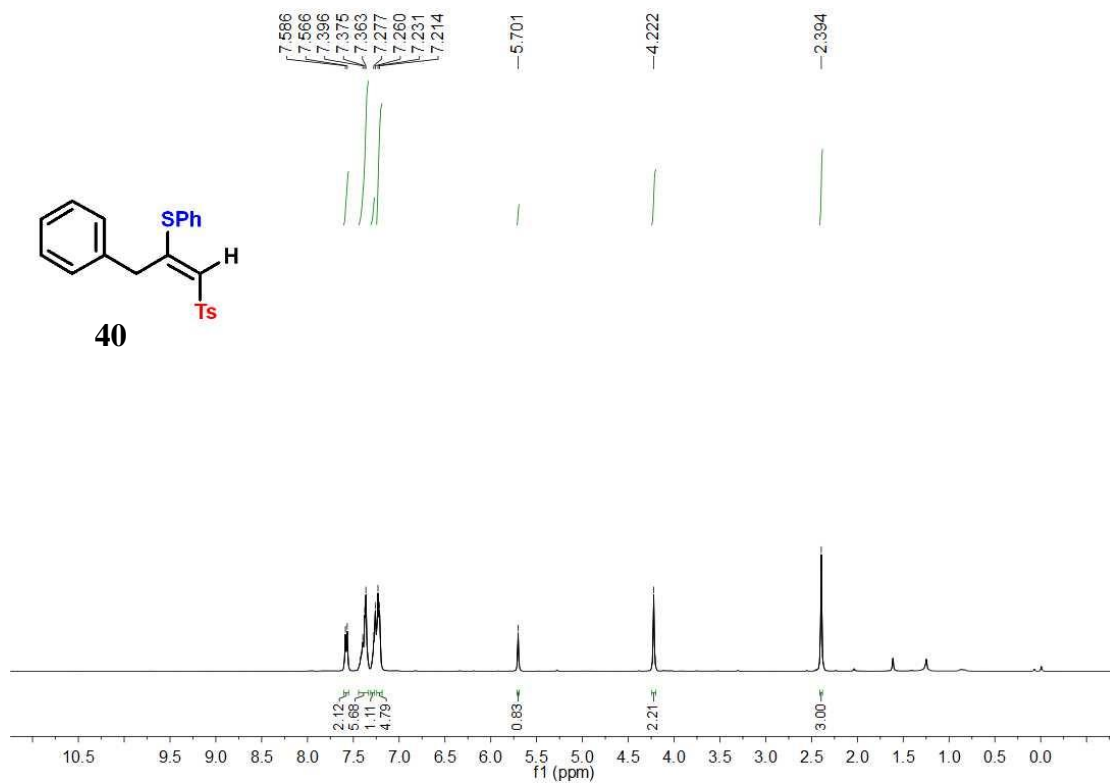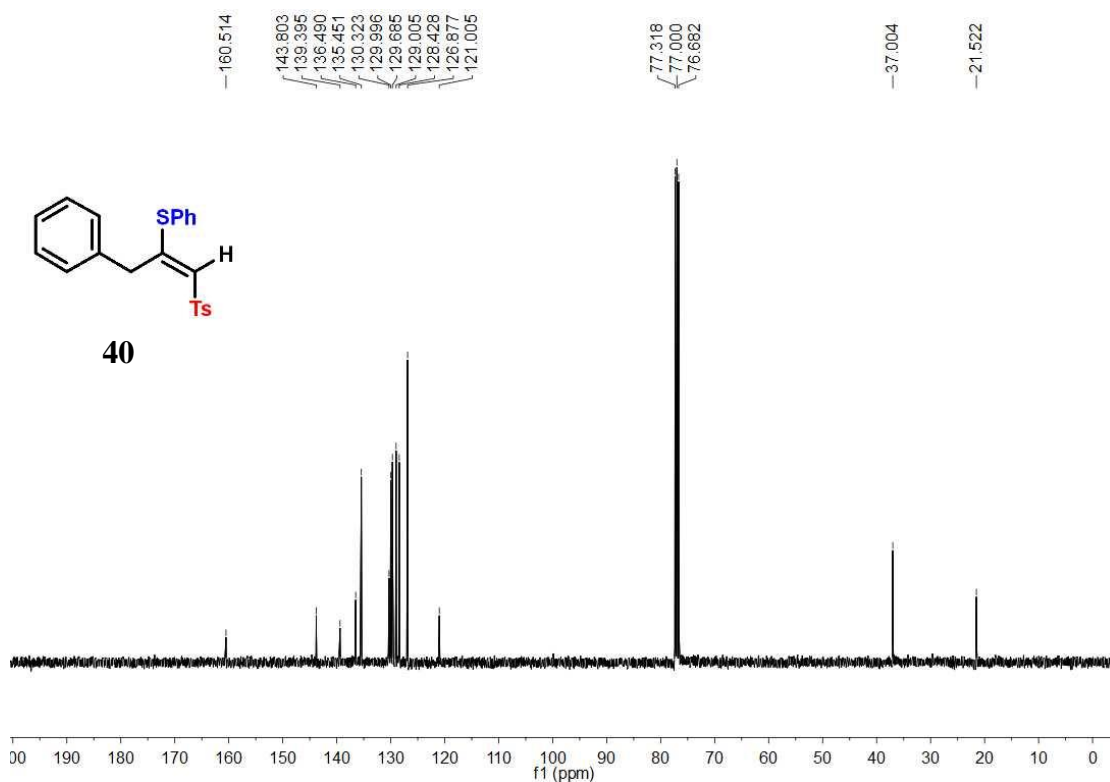

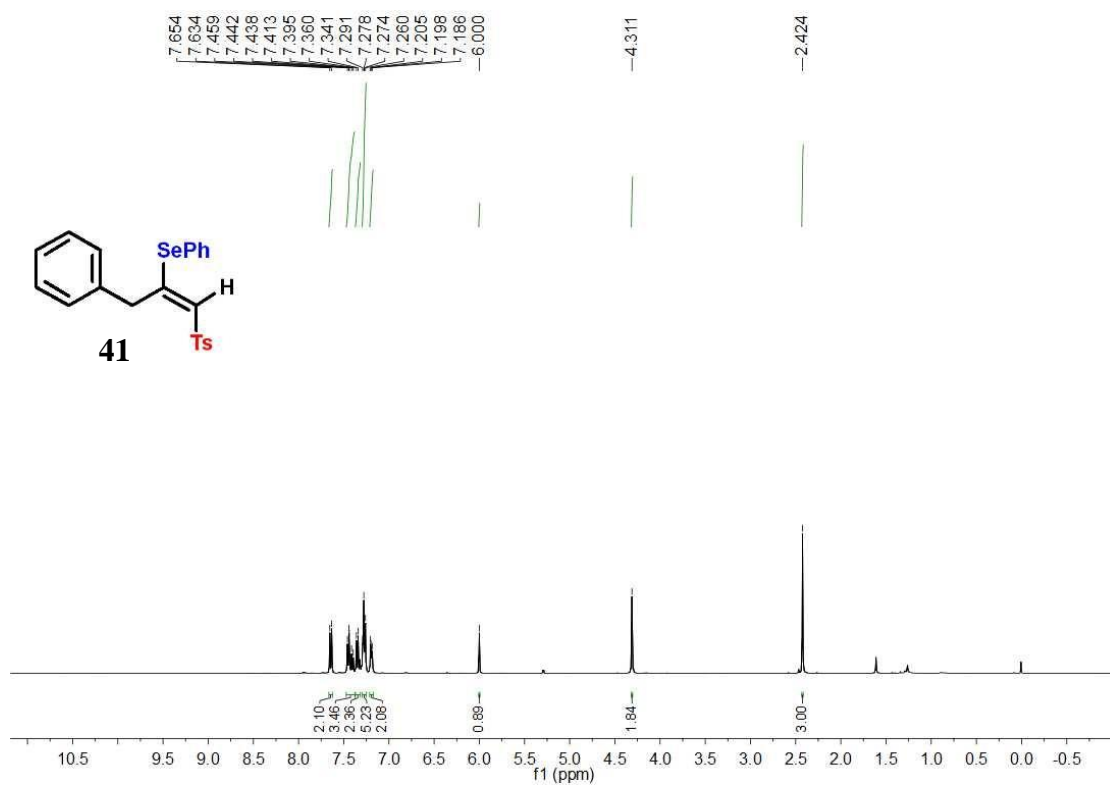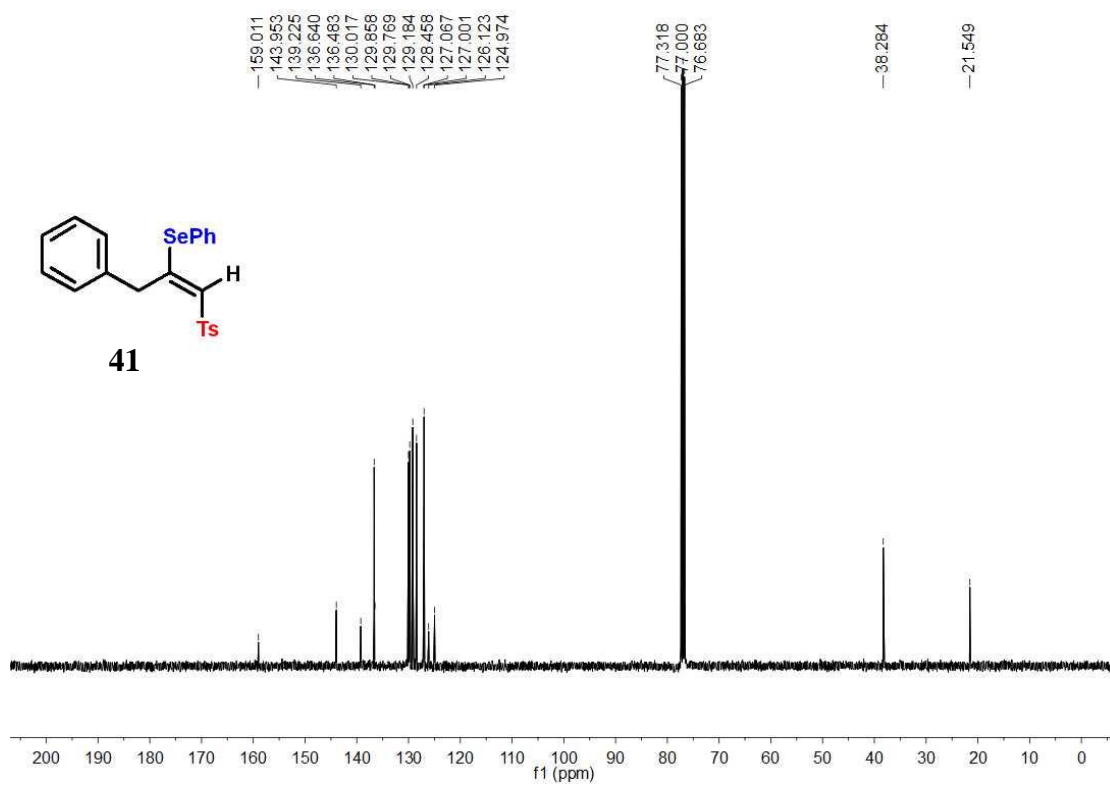

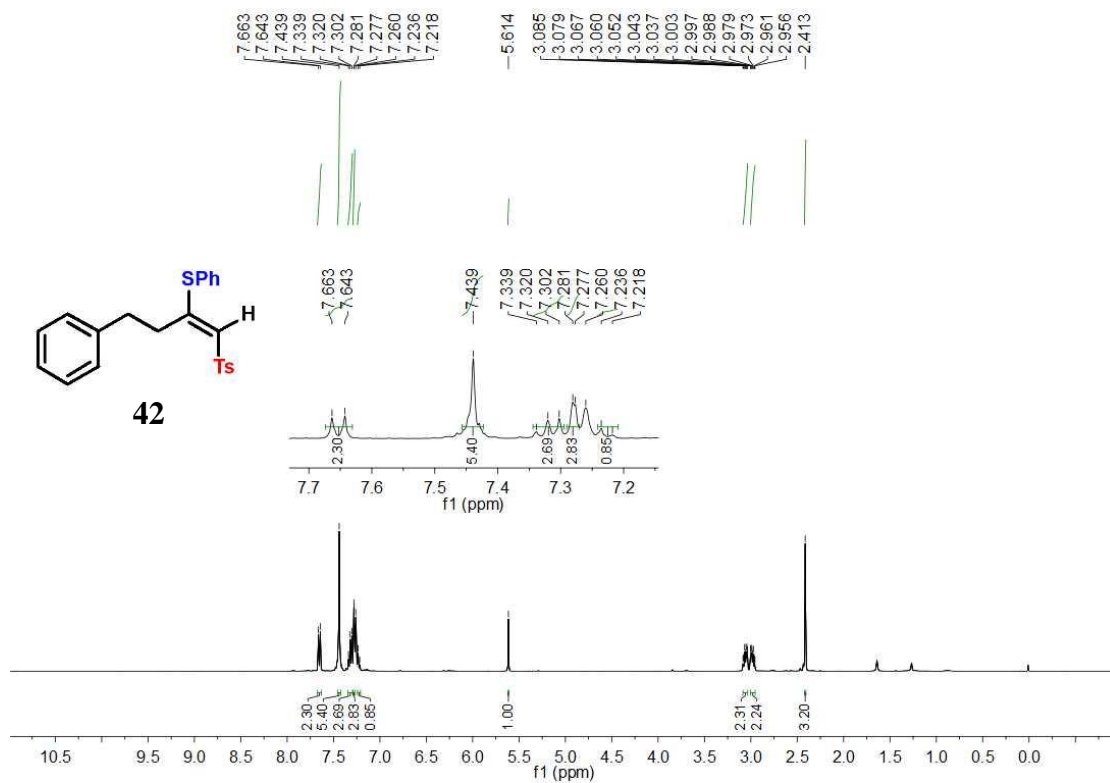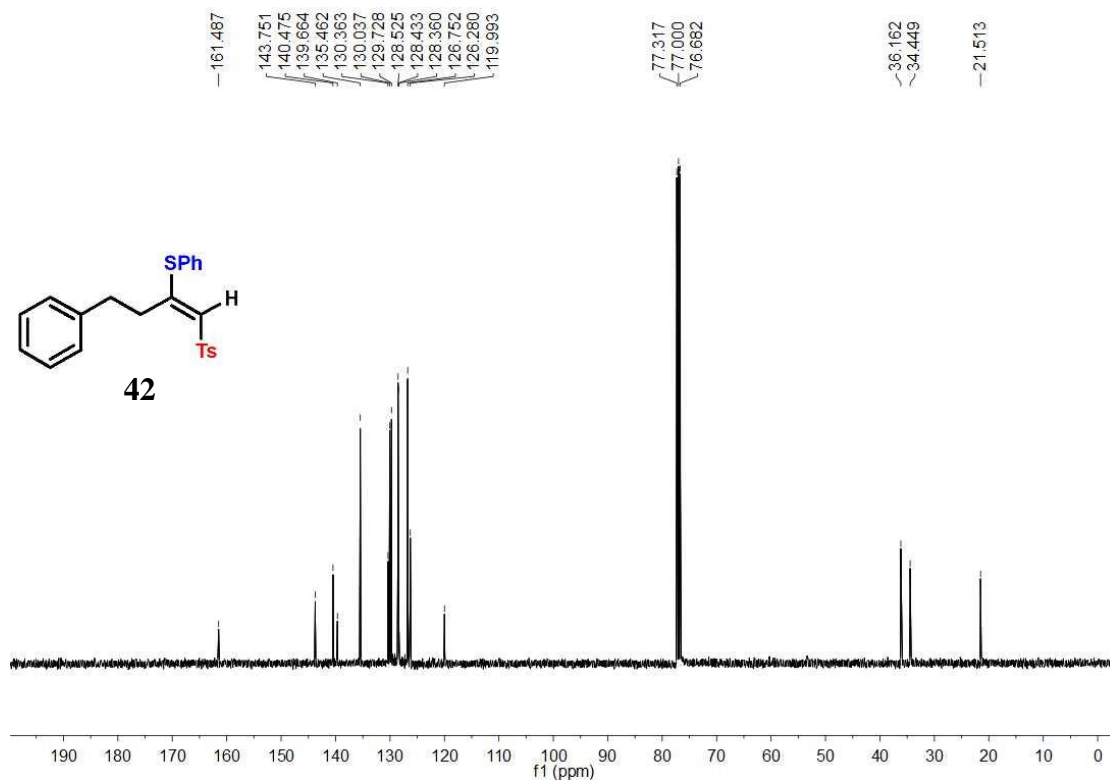

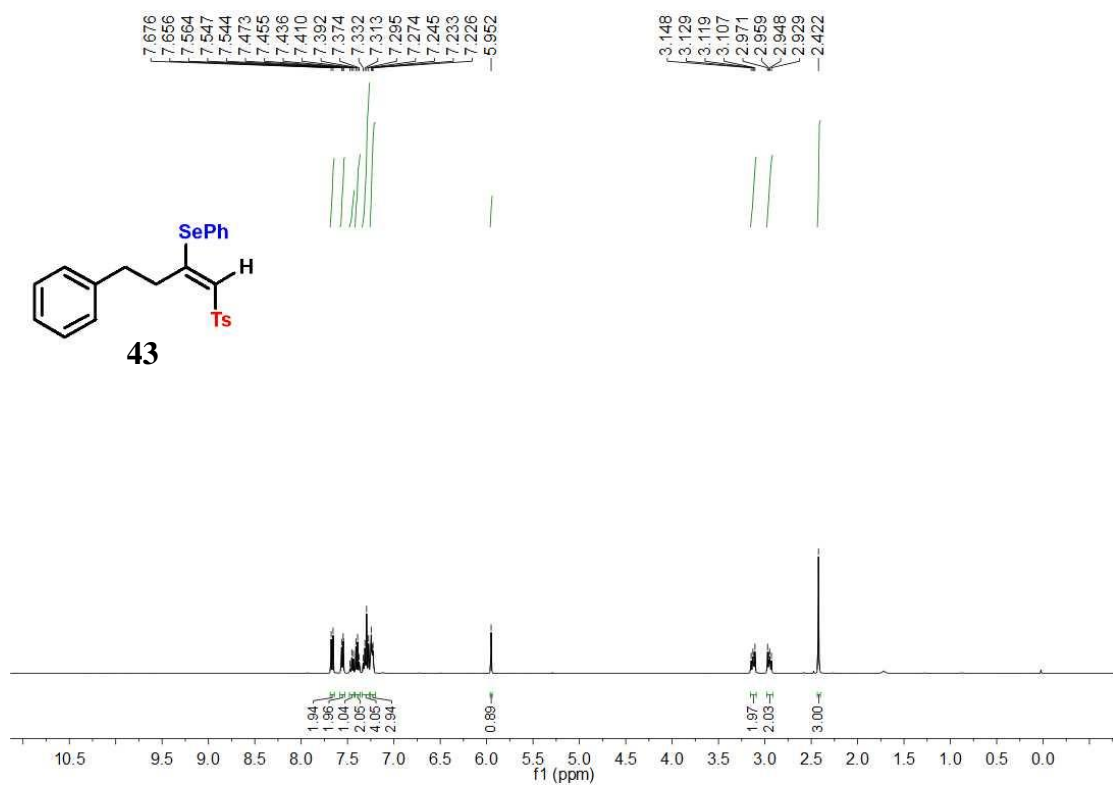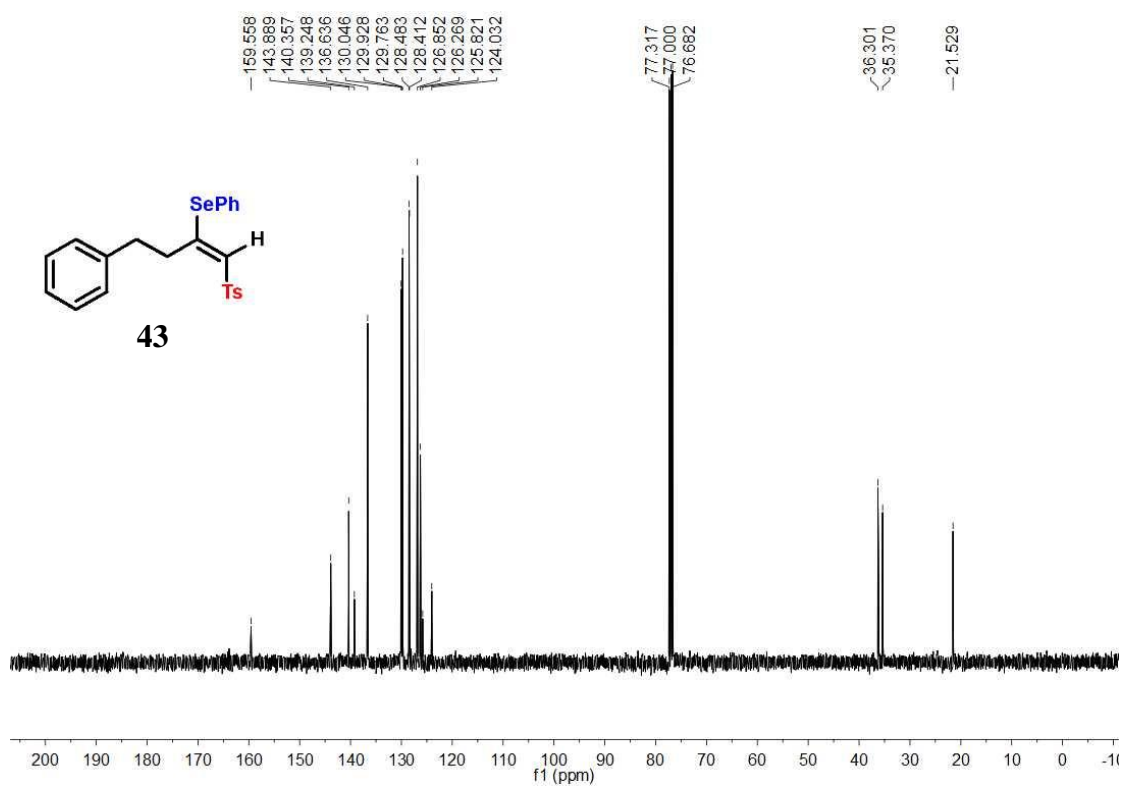



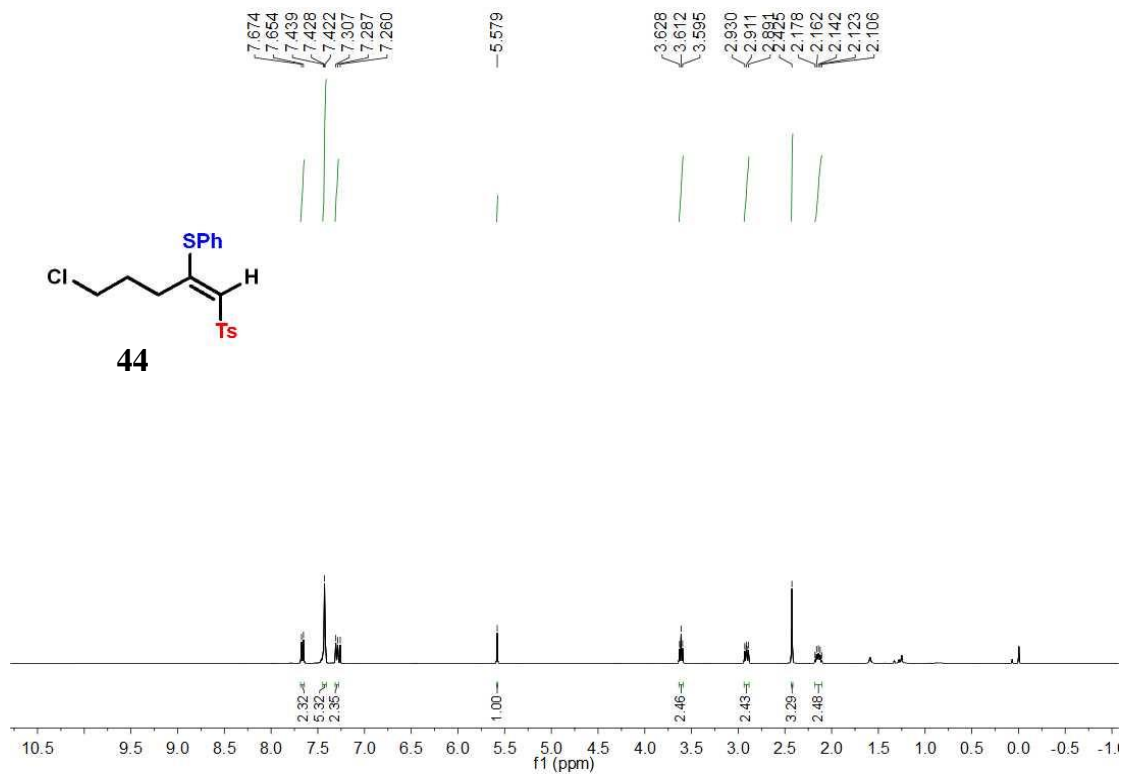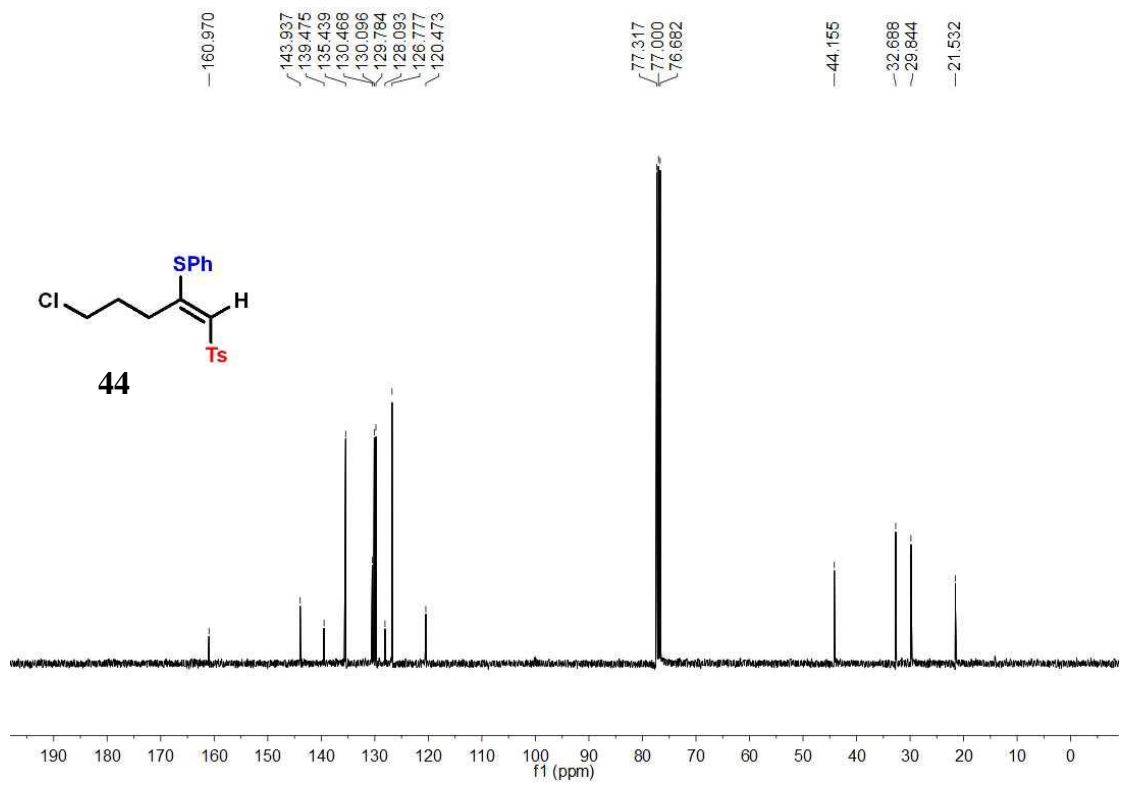

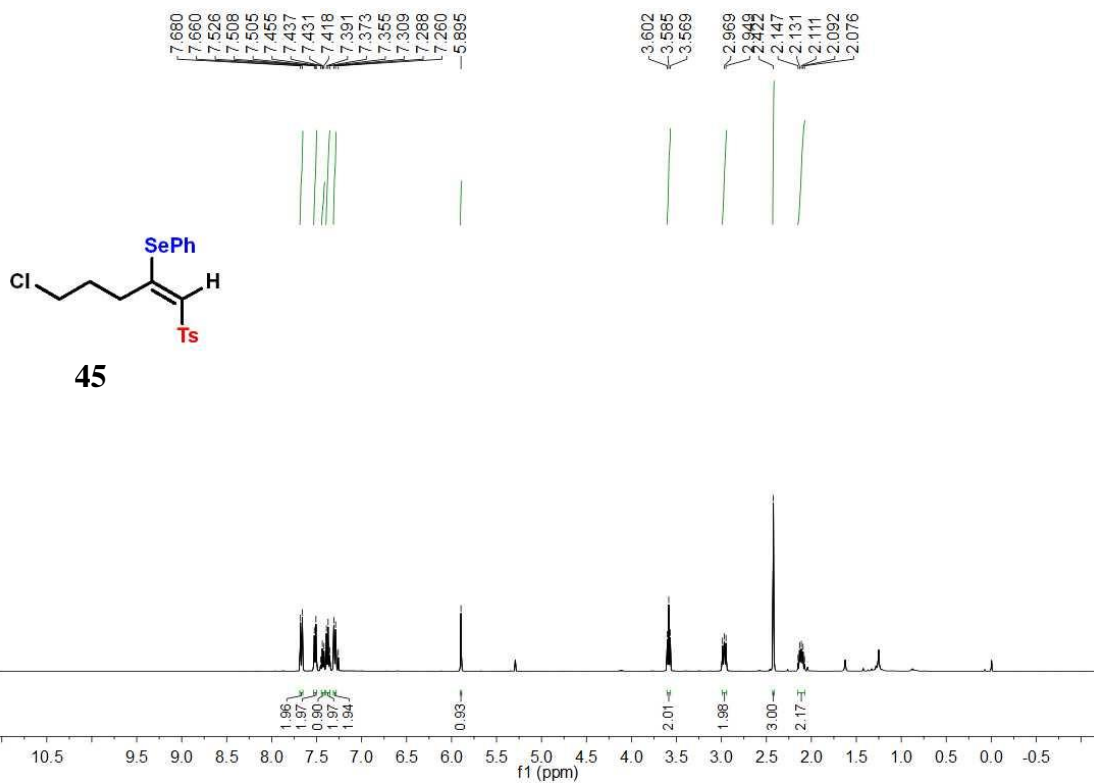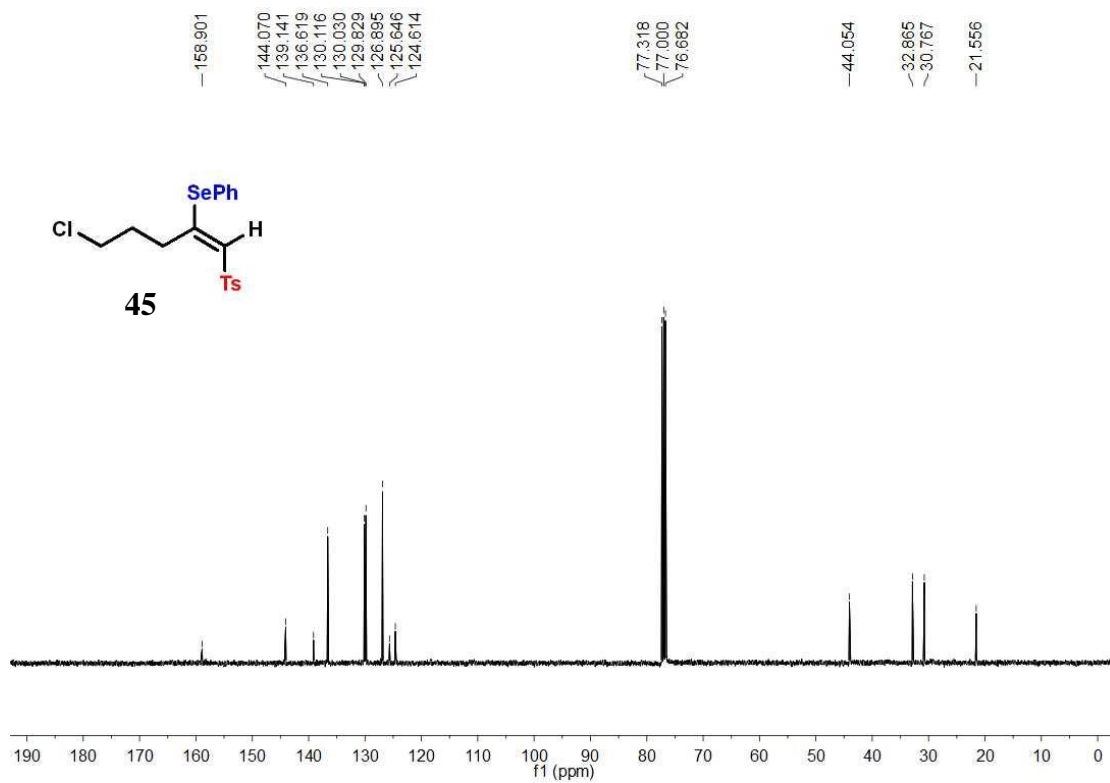

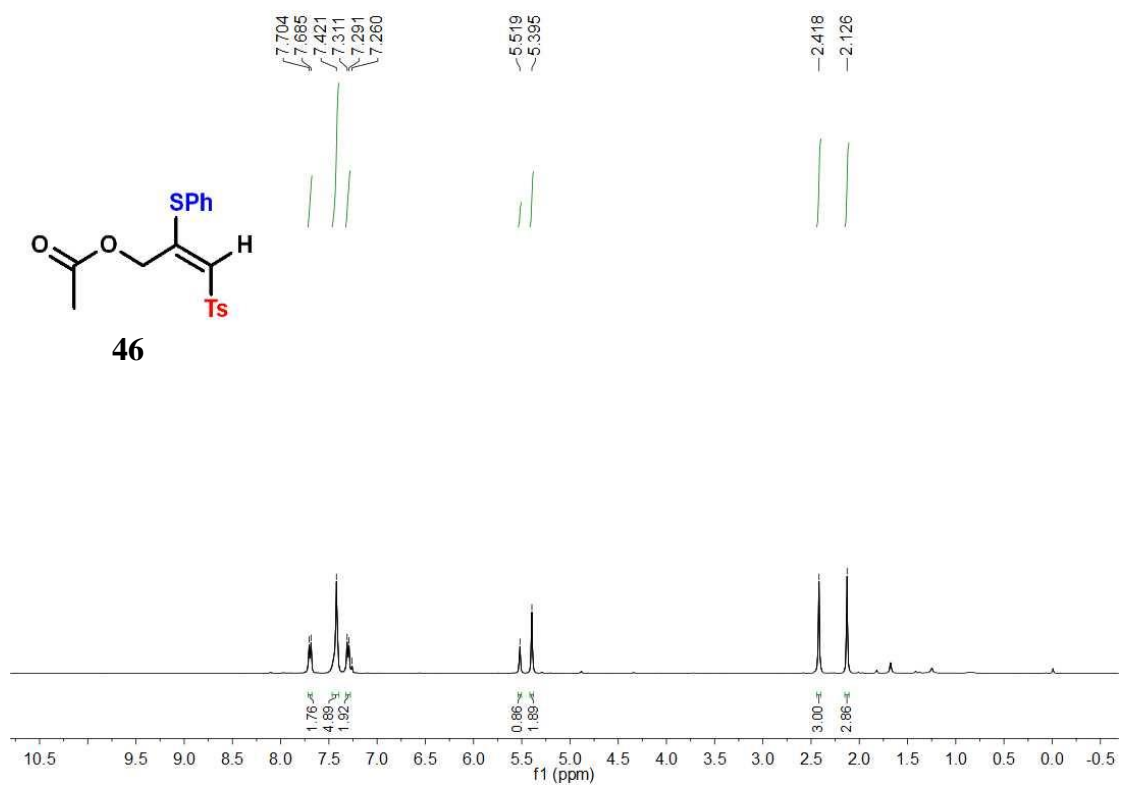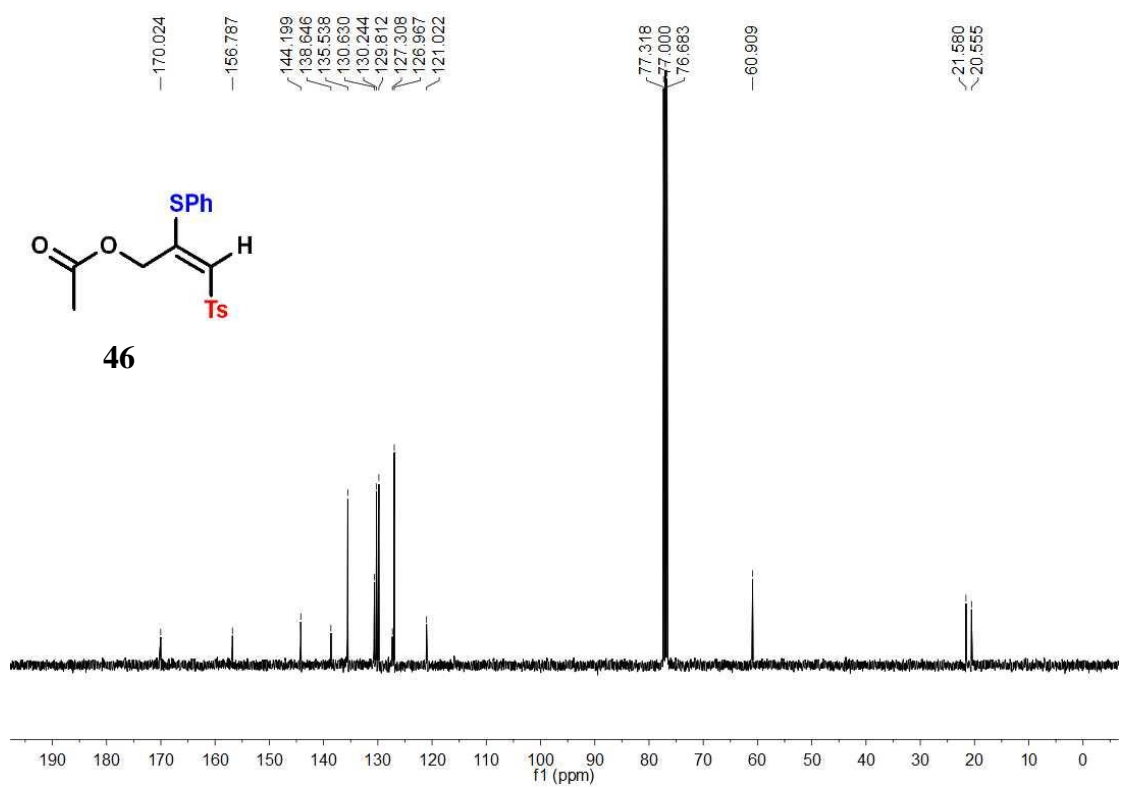

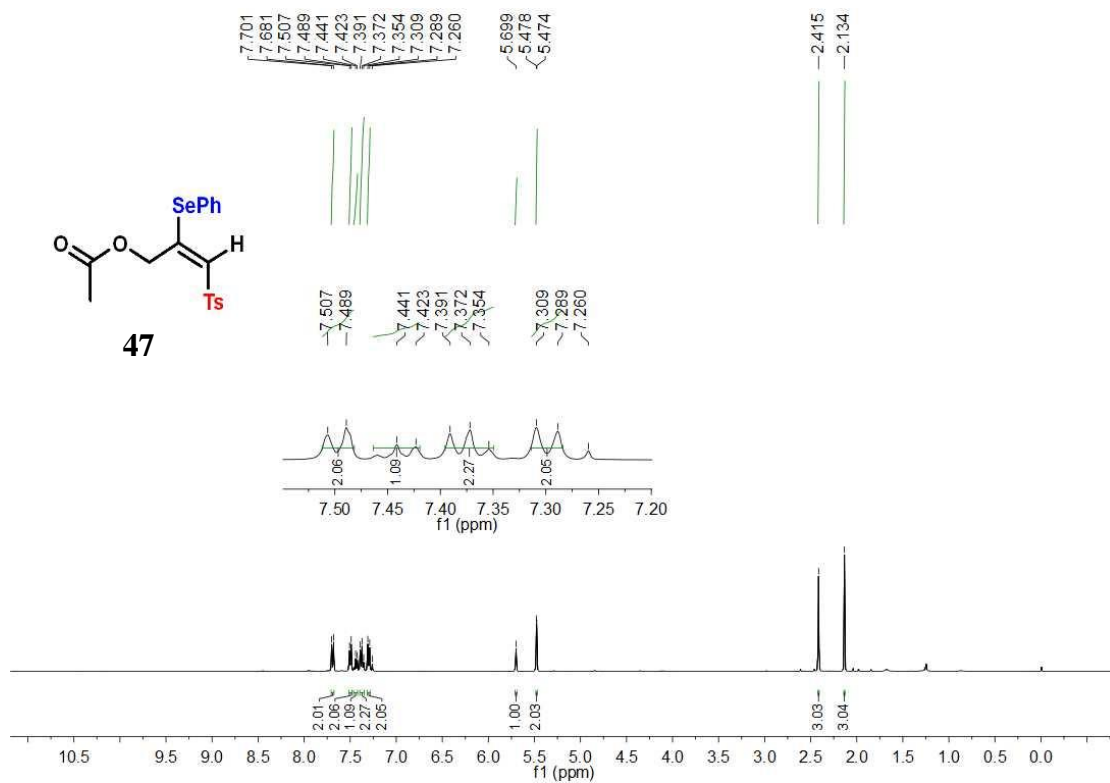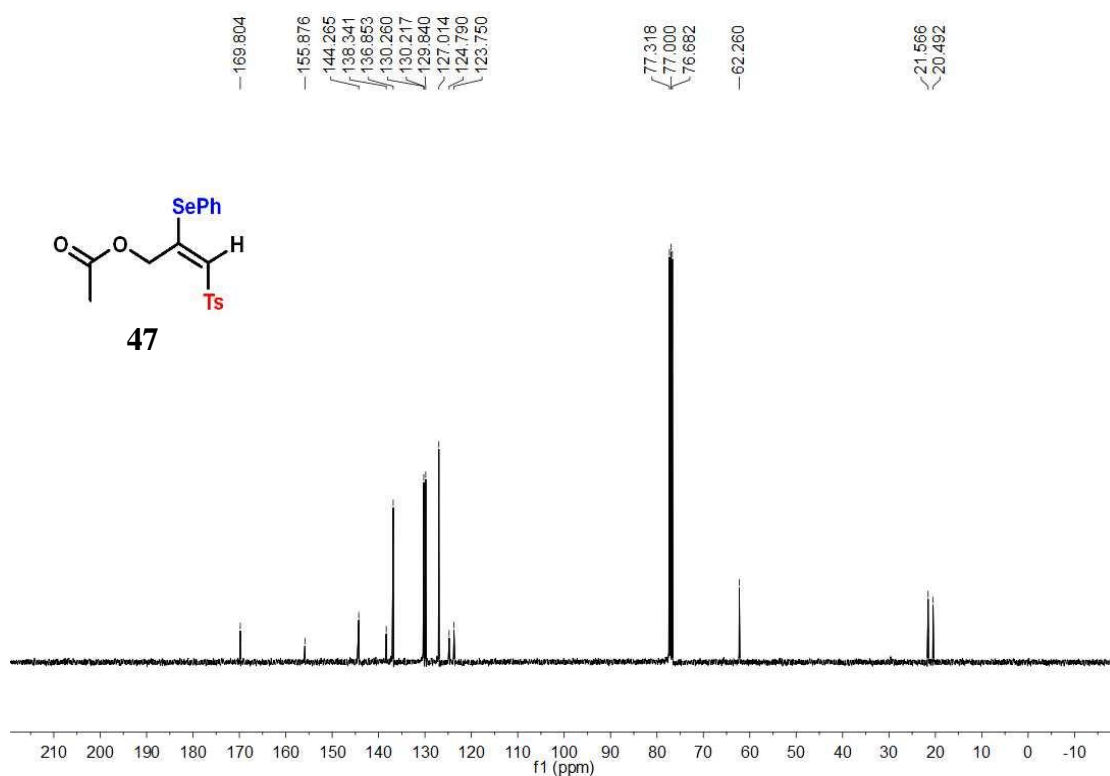

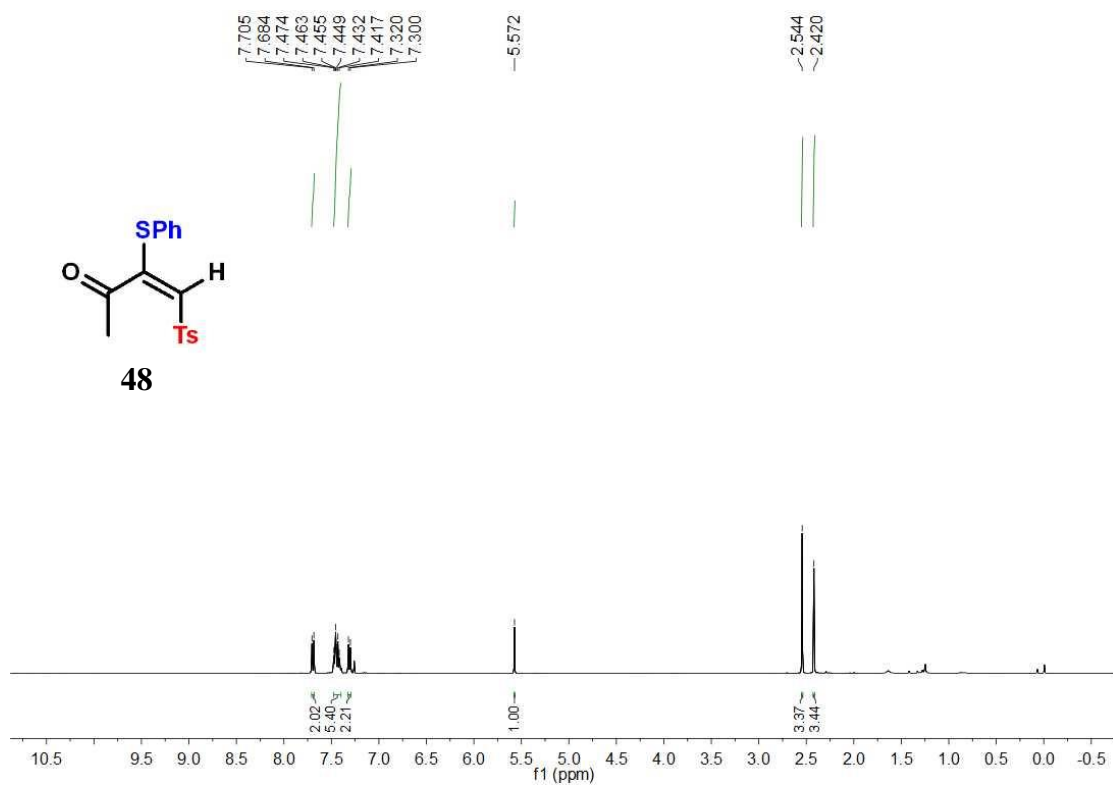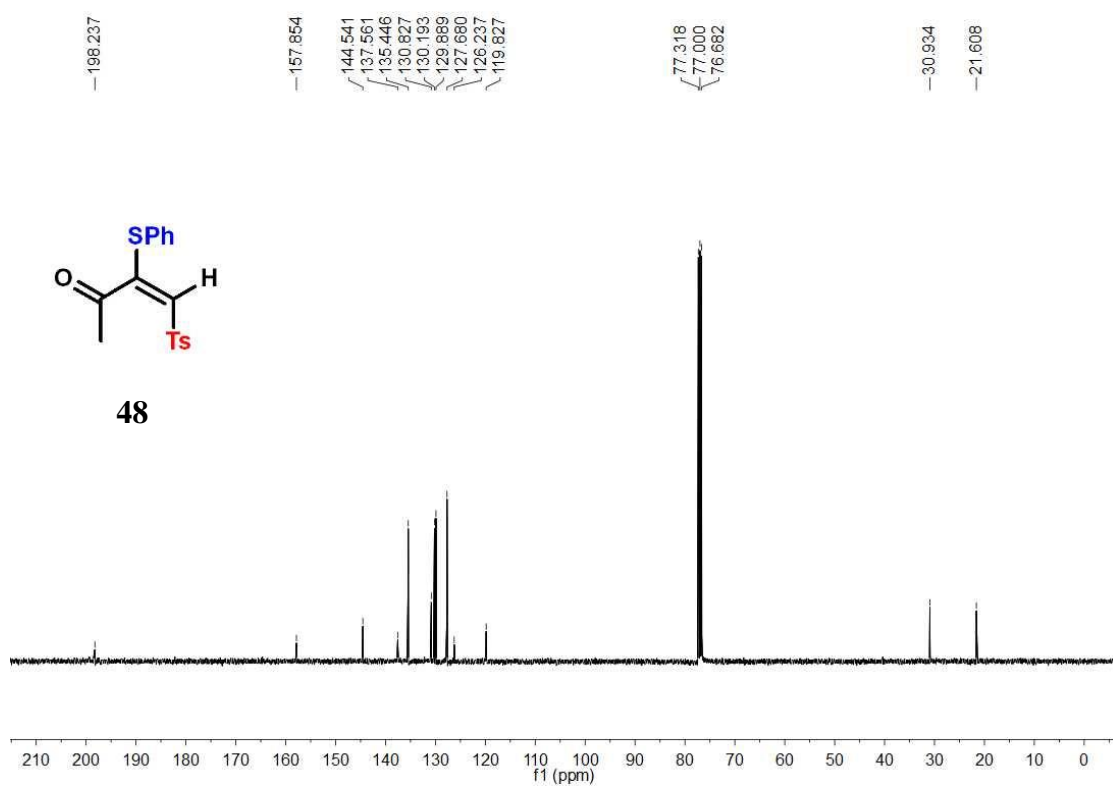

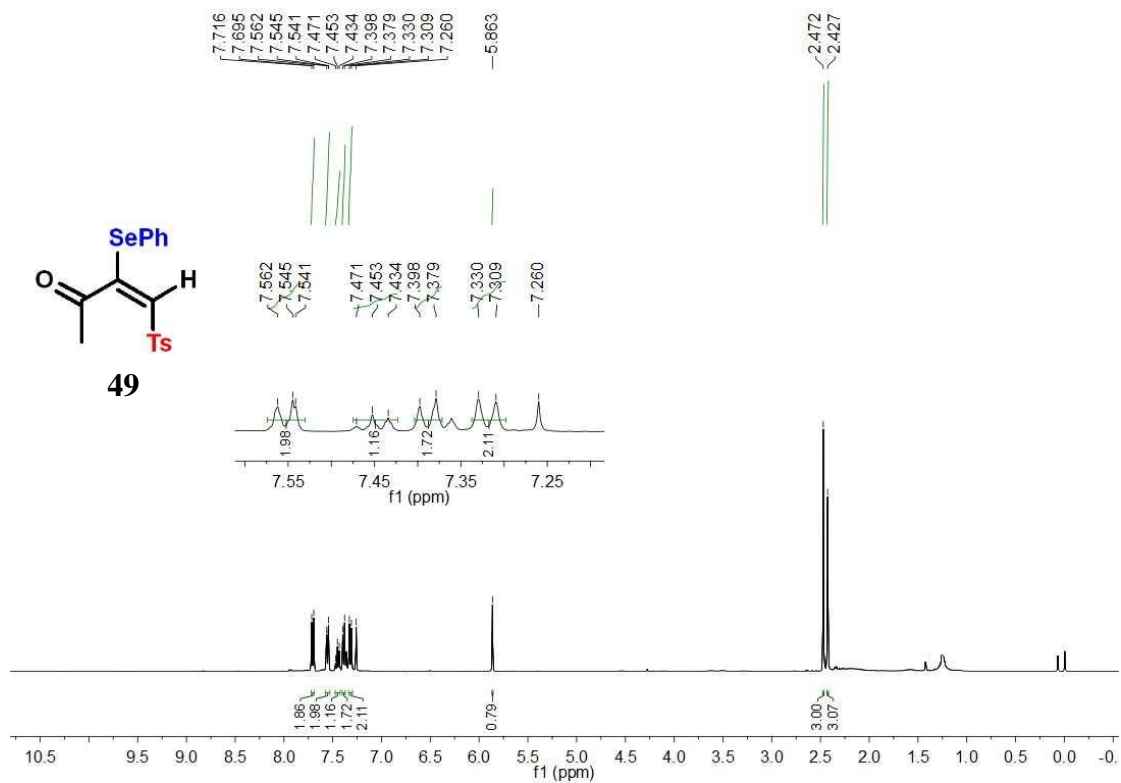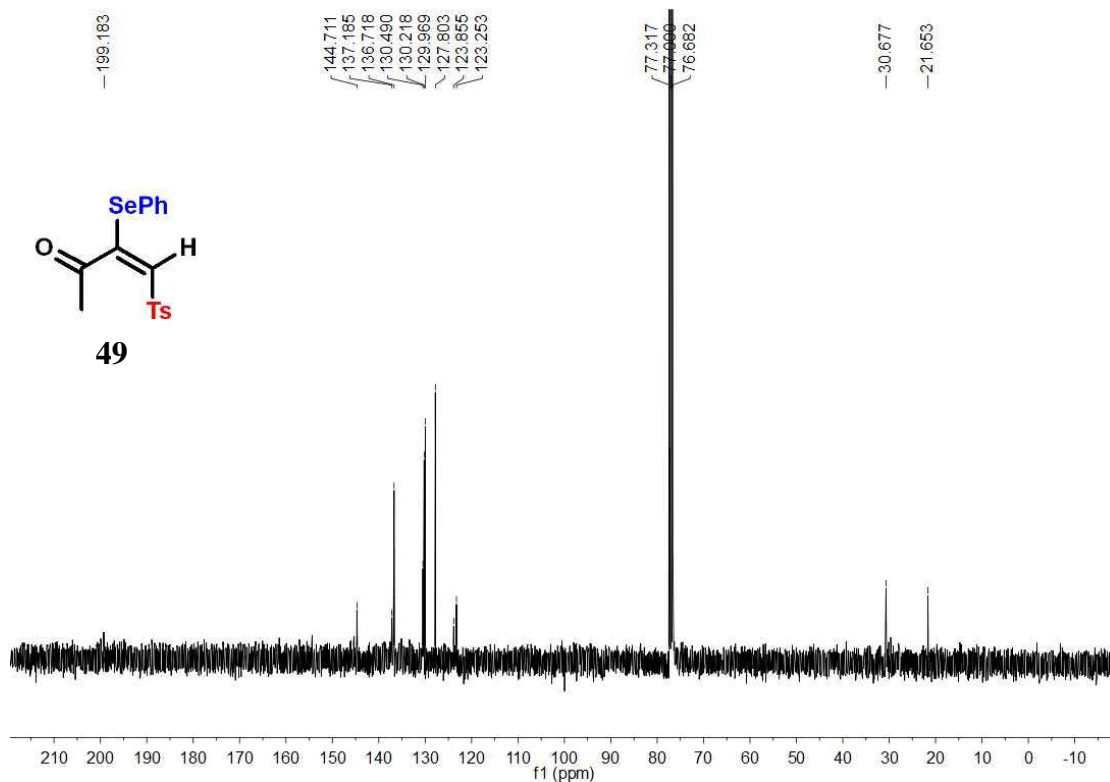

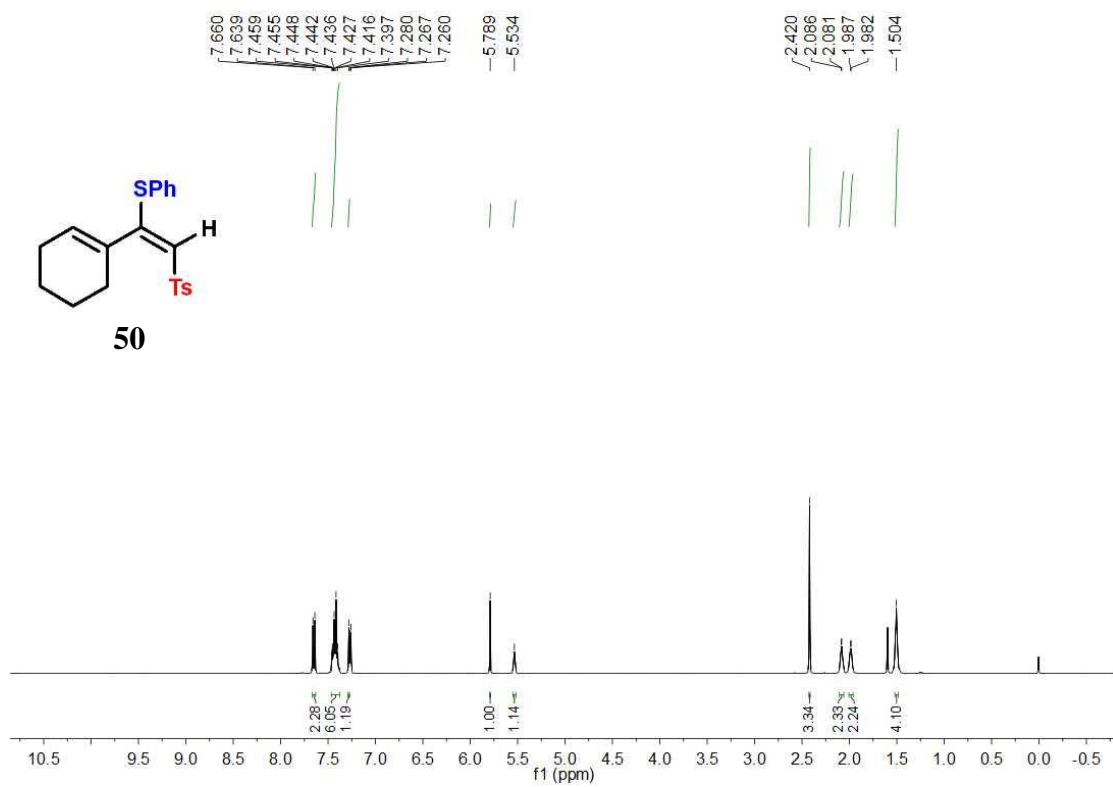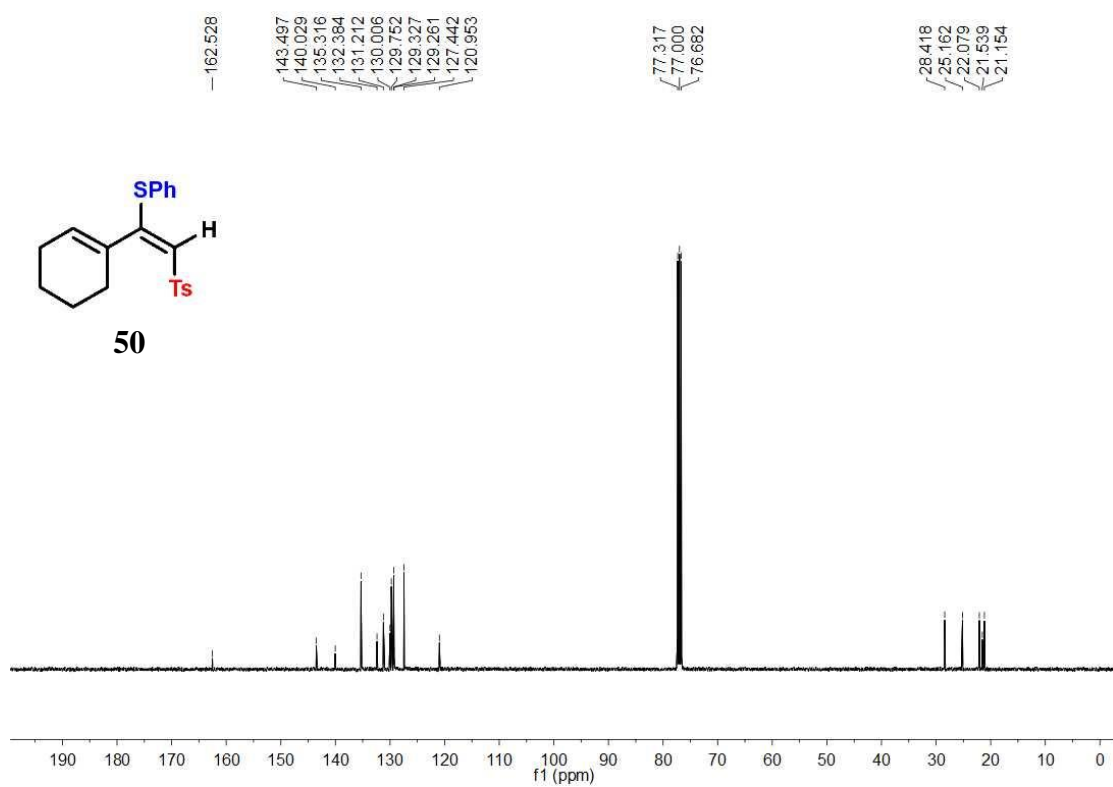

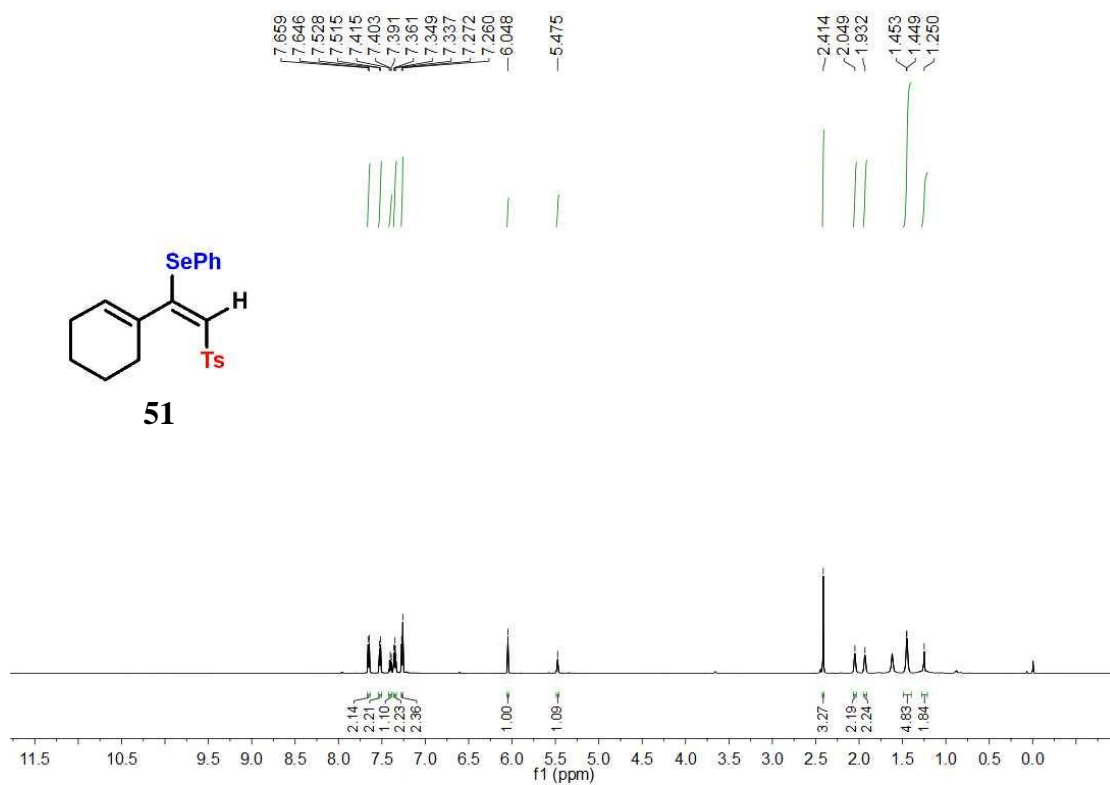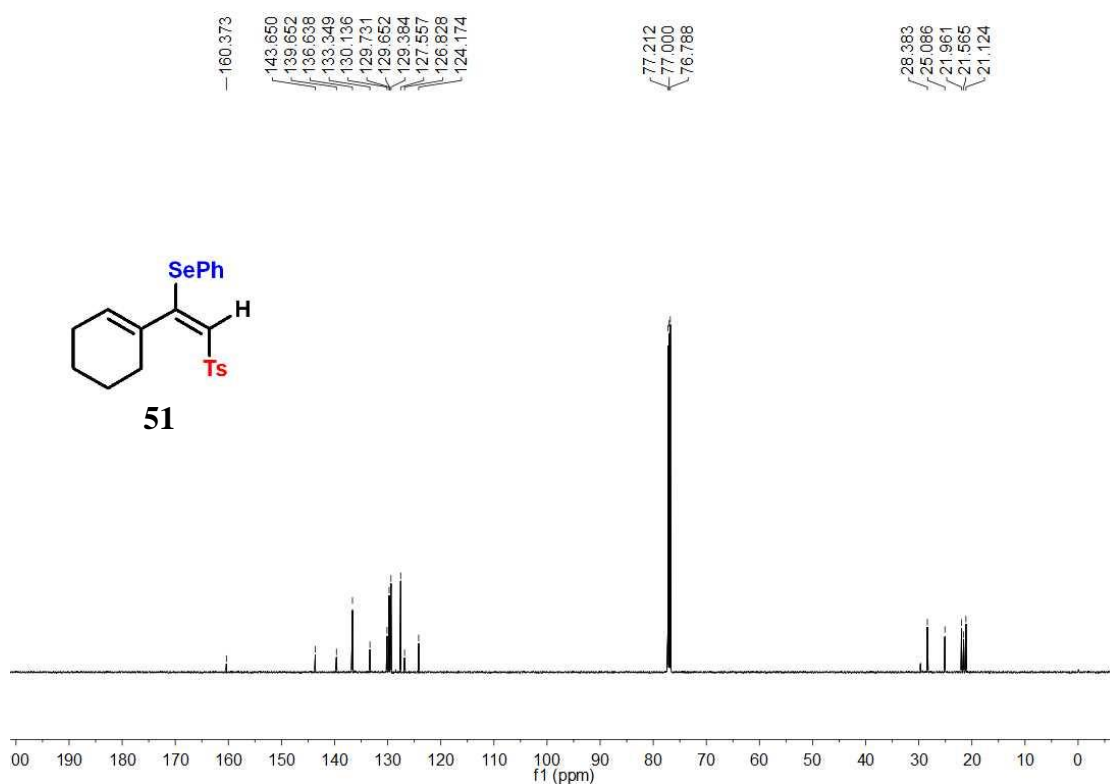



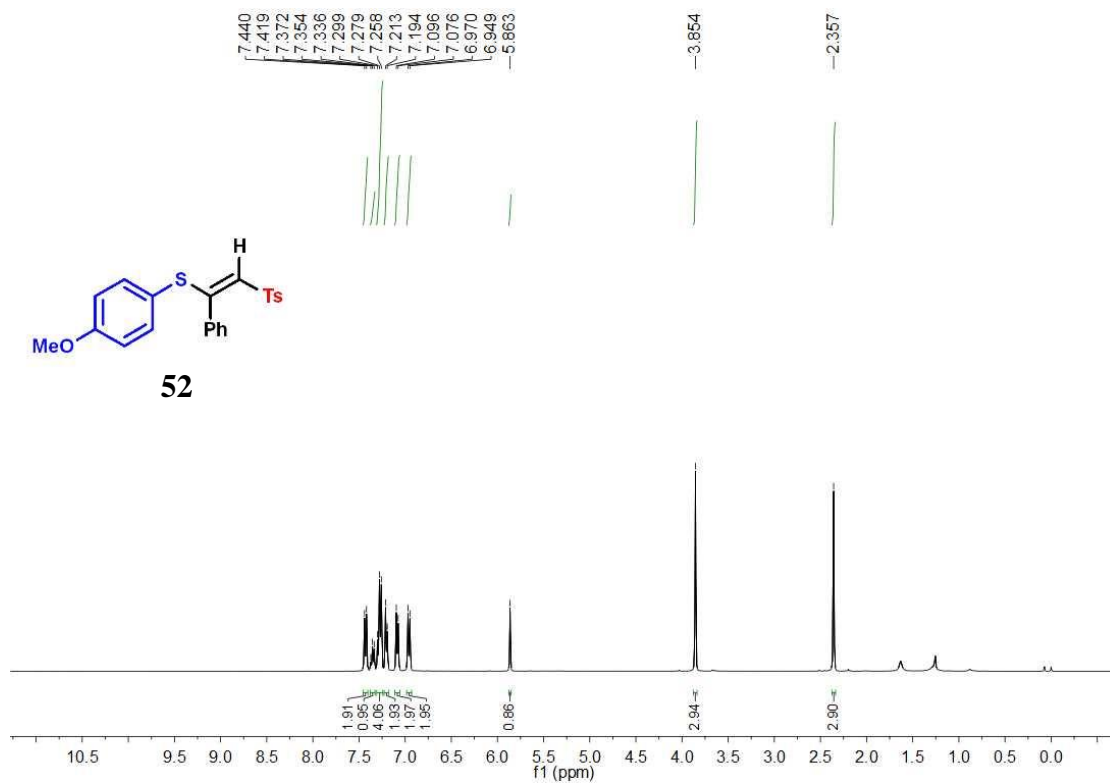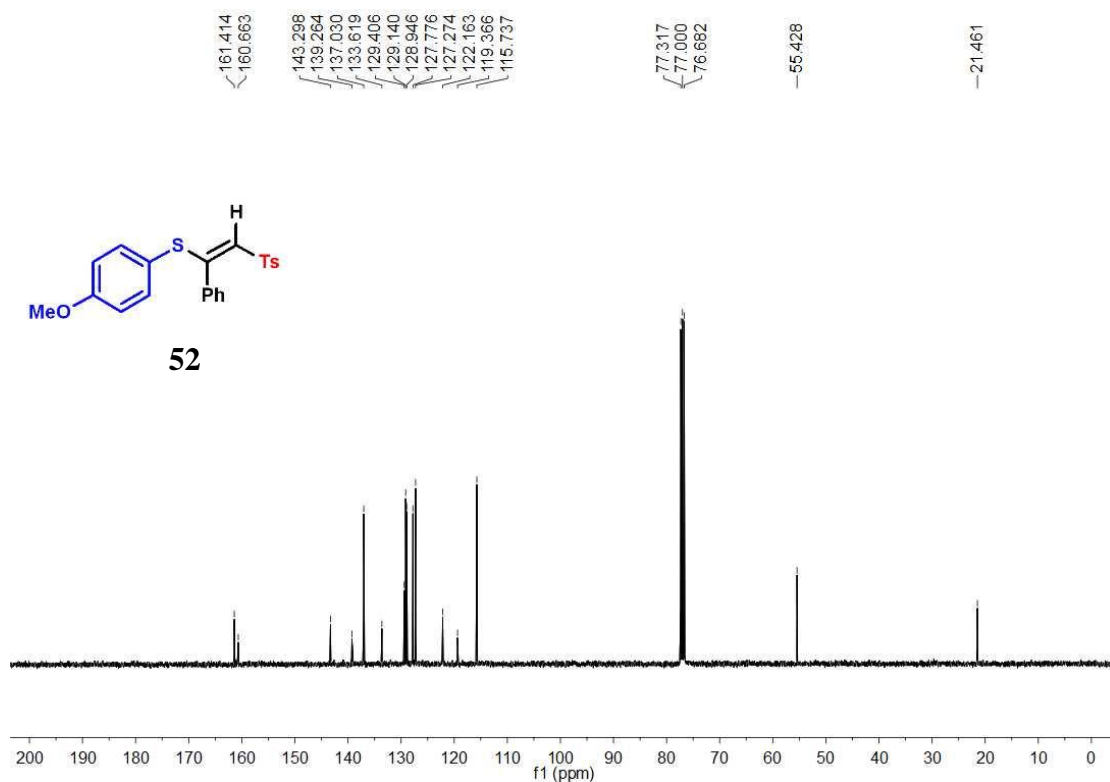

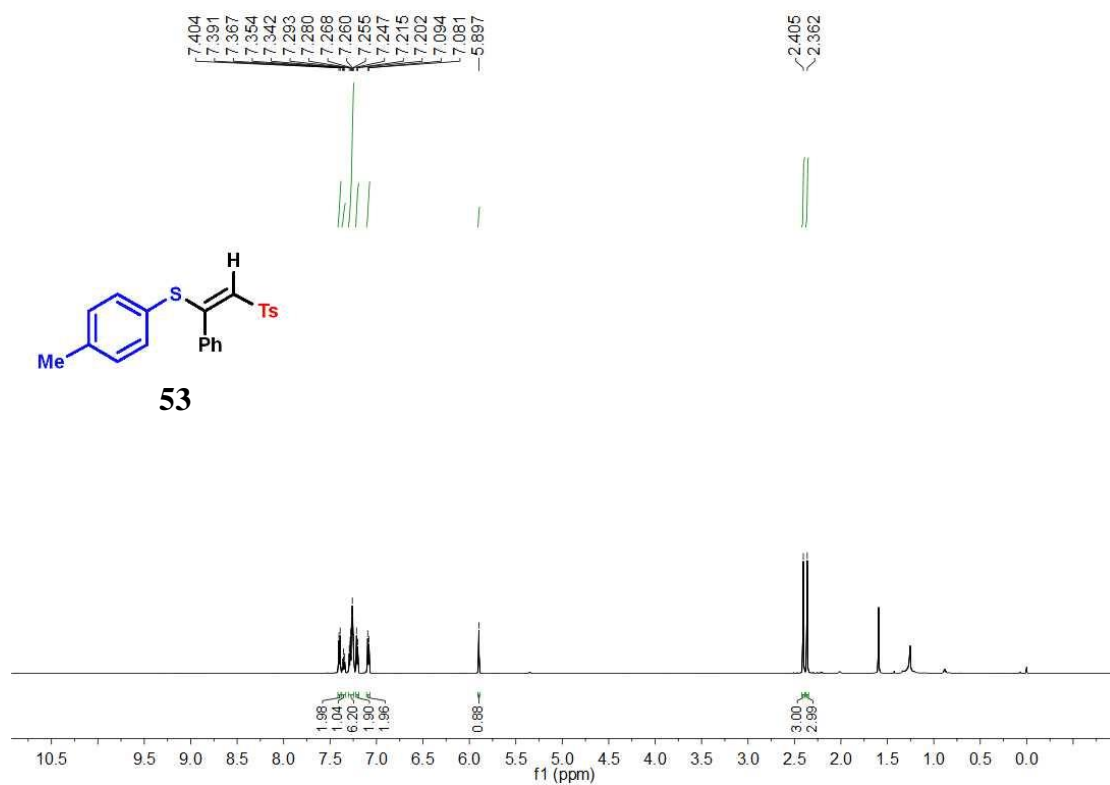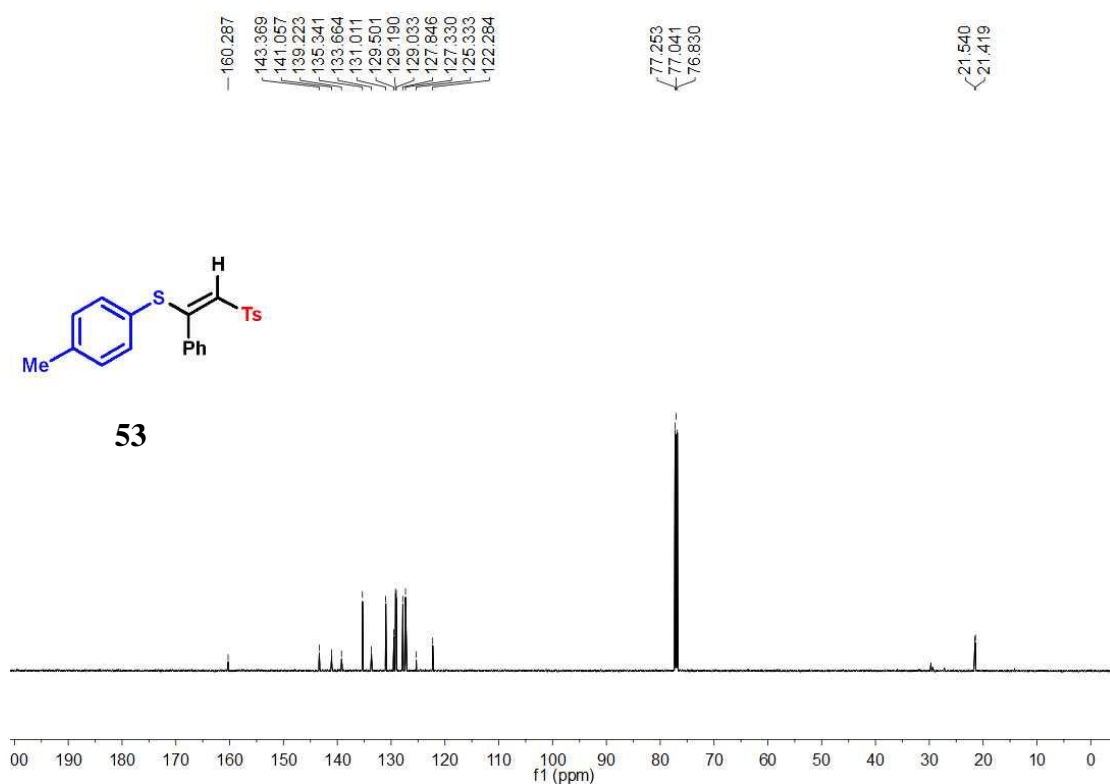

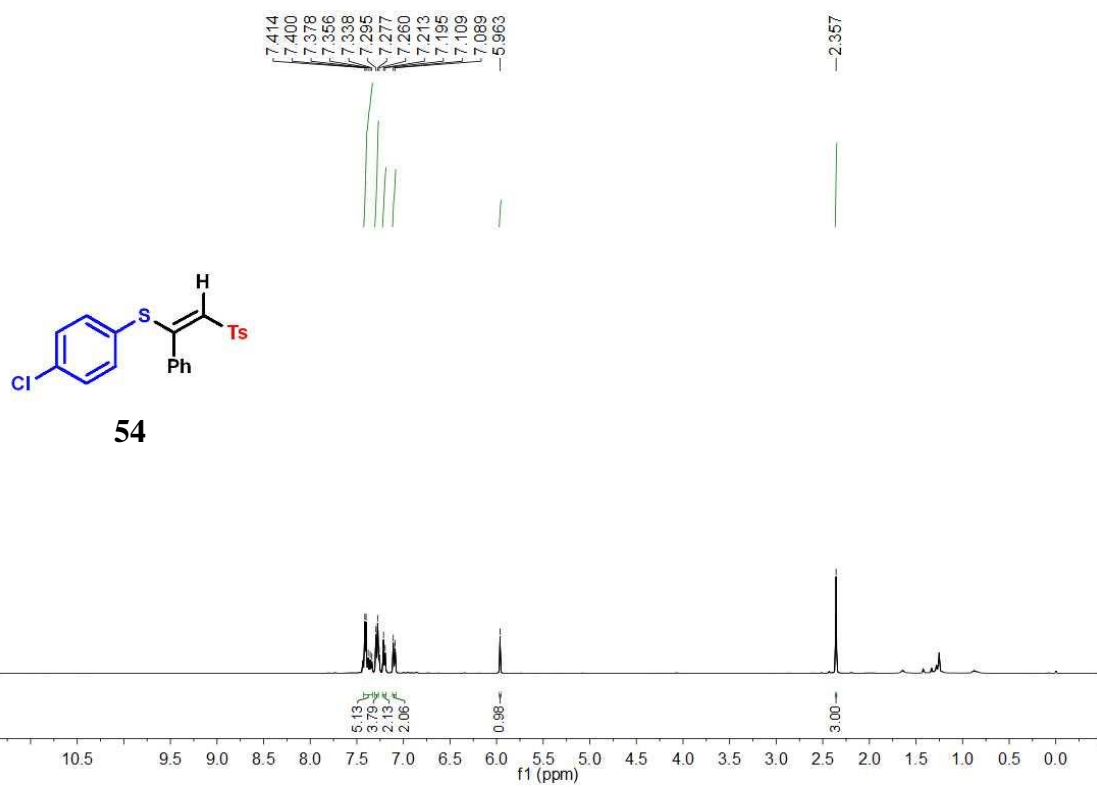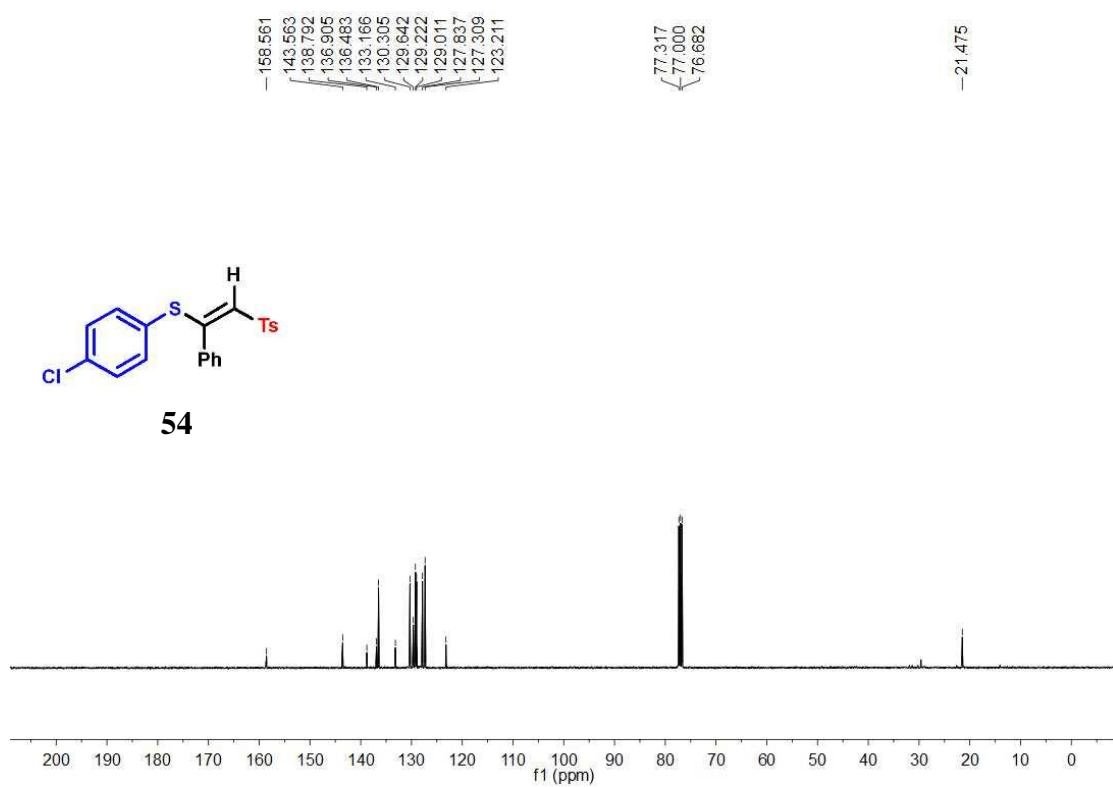

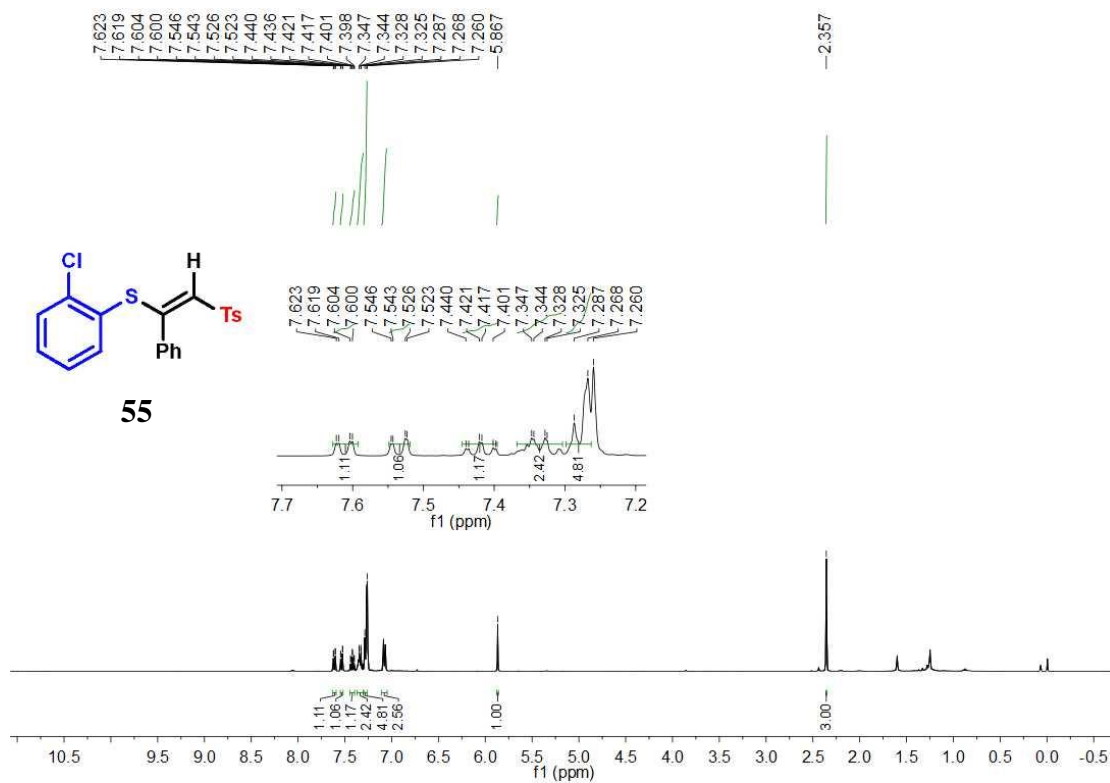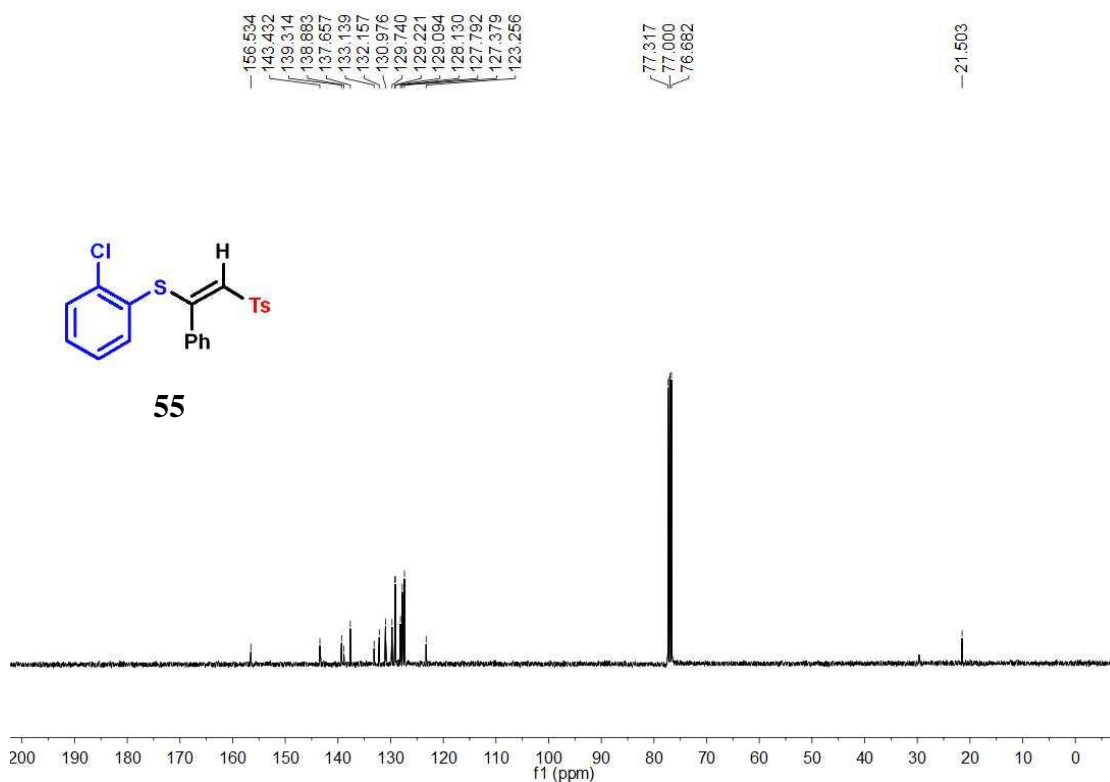

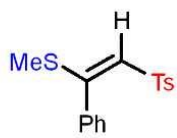

56

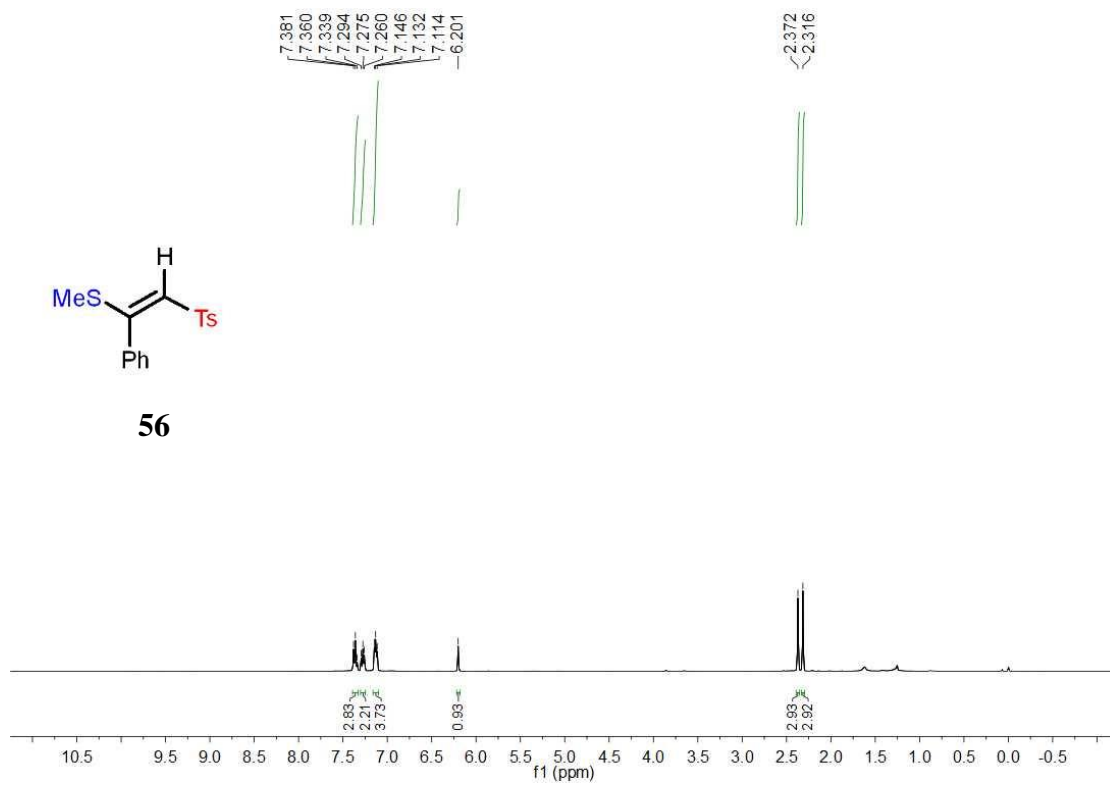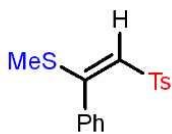

56

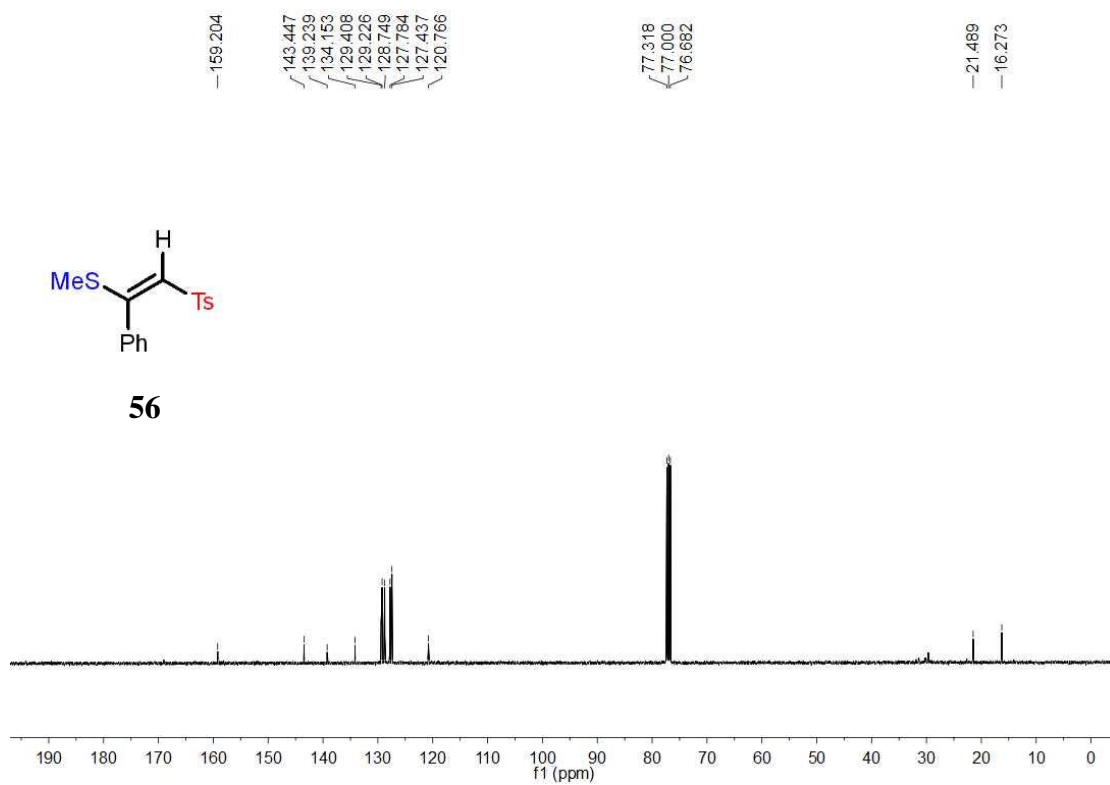

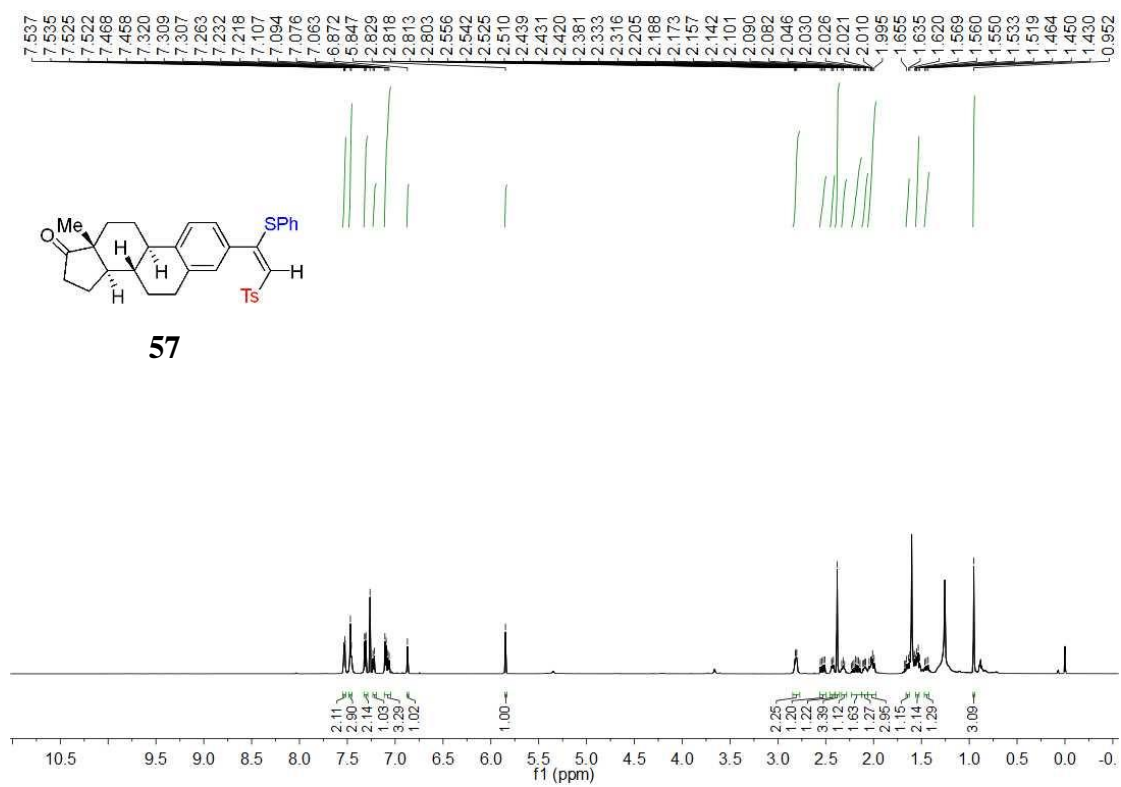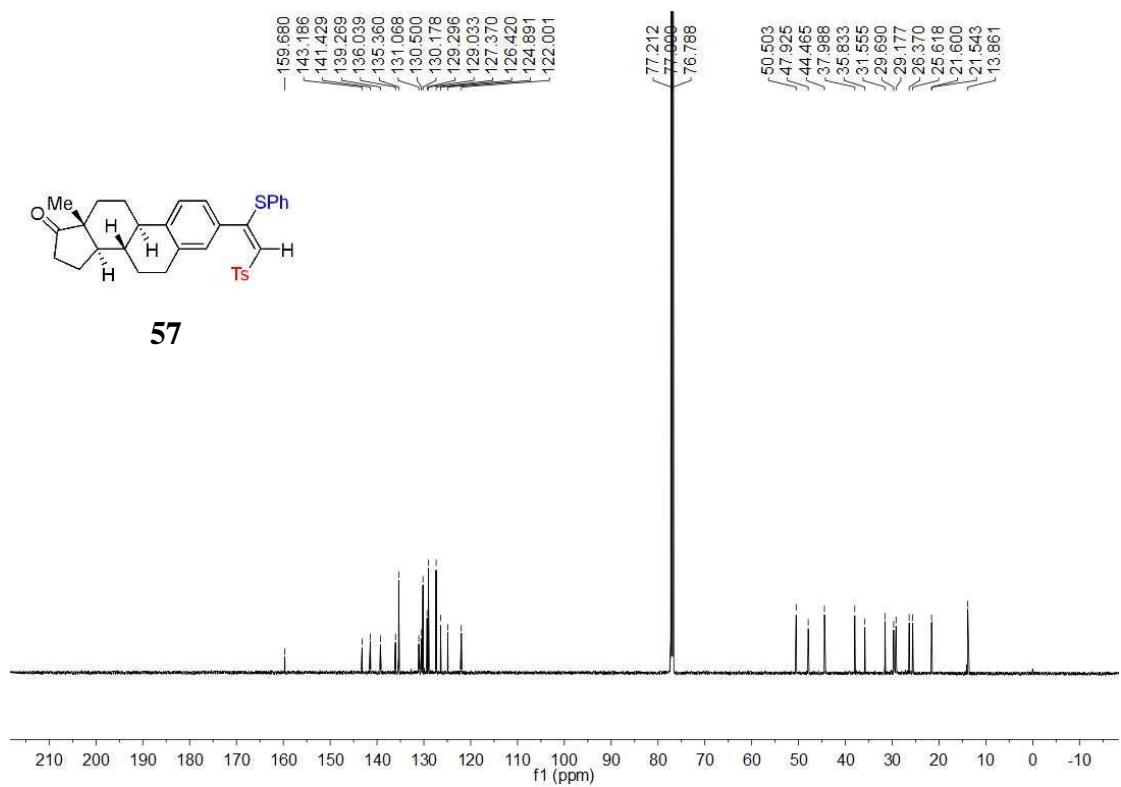

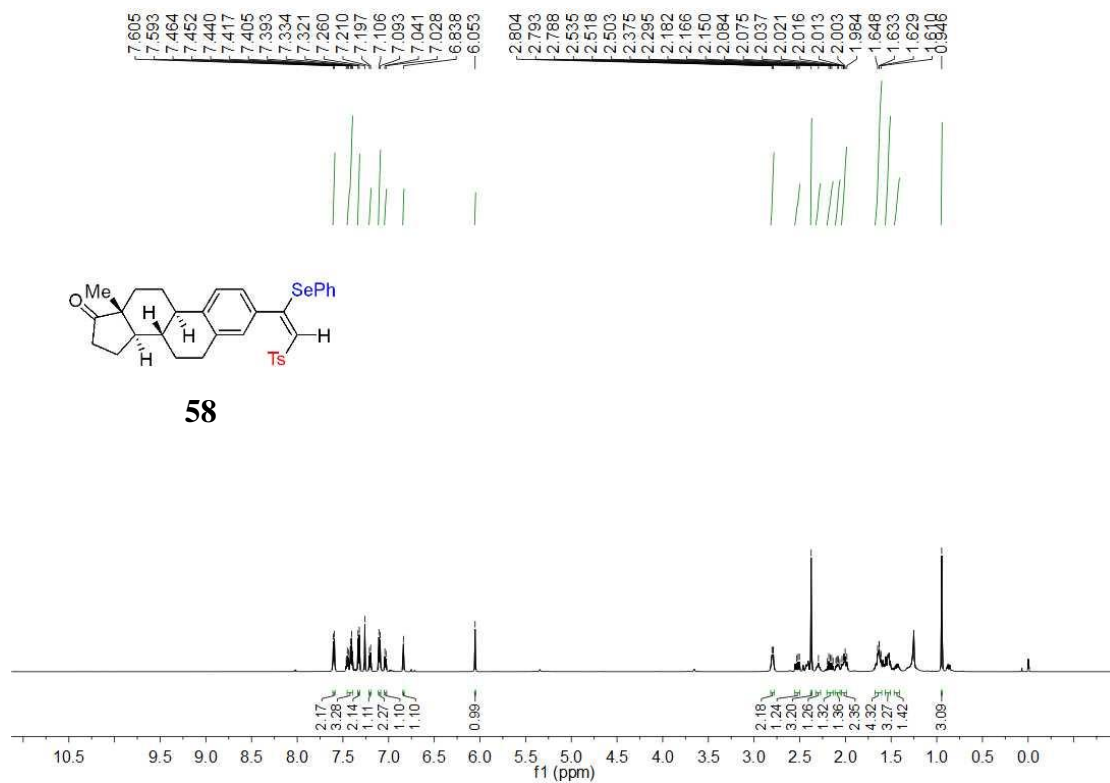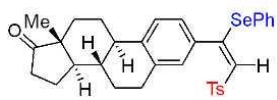

58

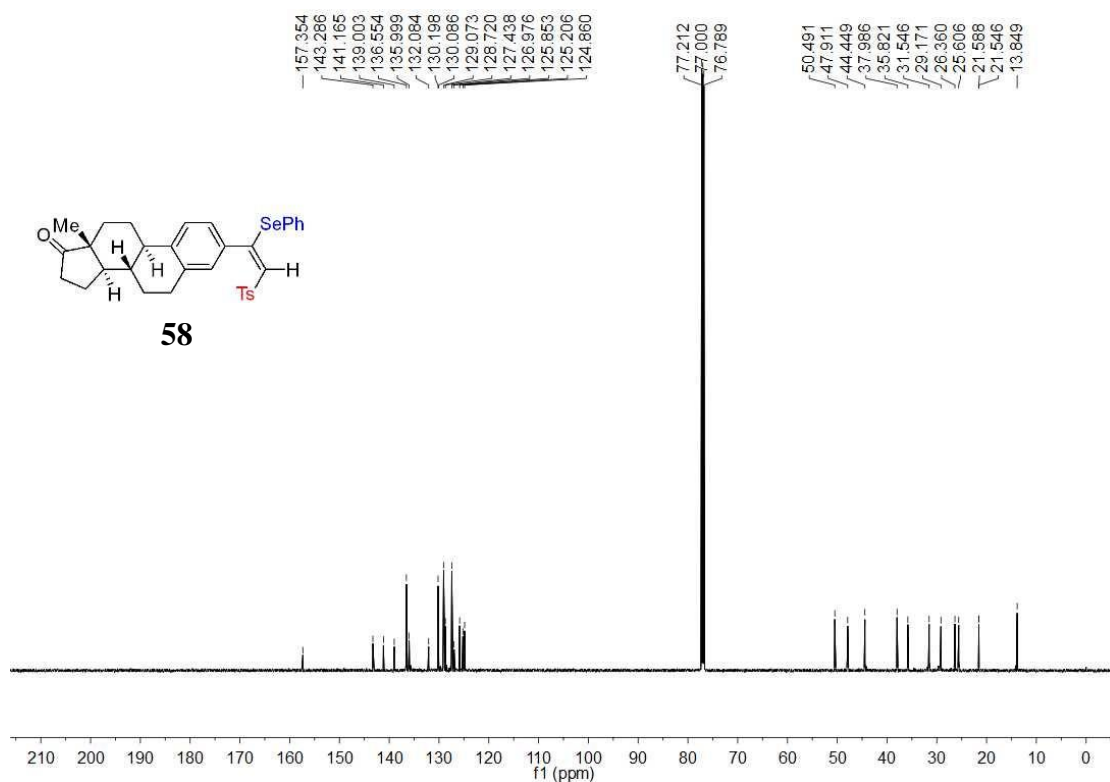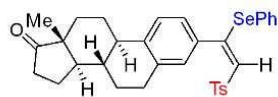

58

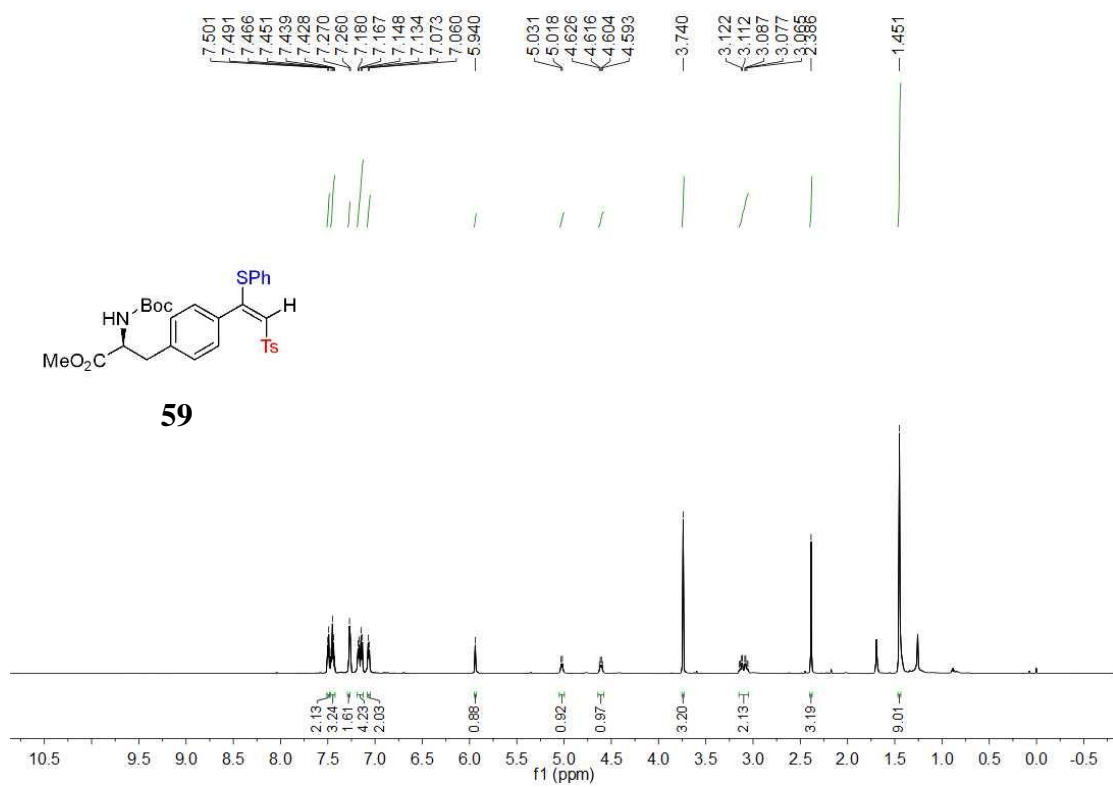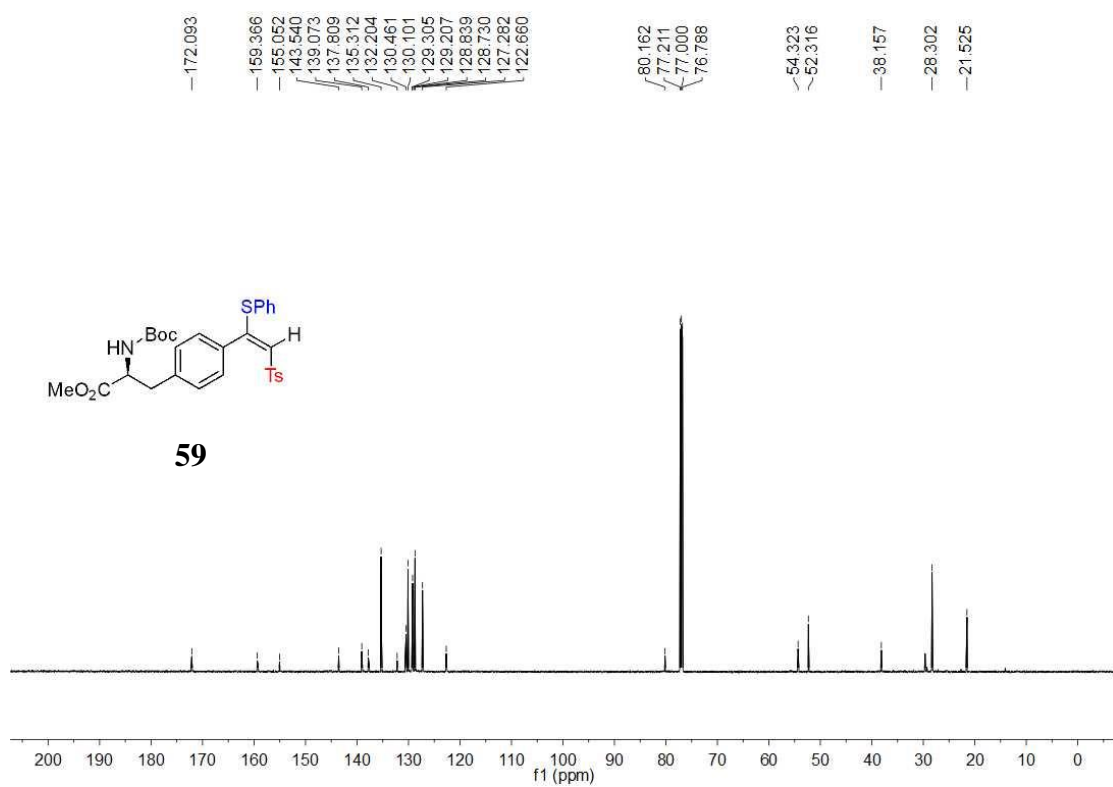



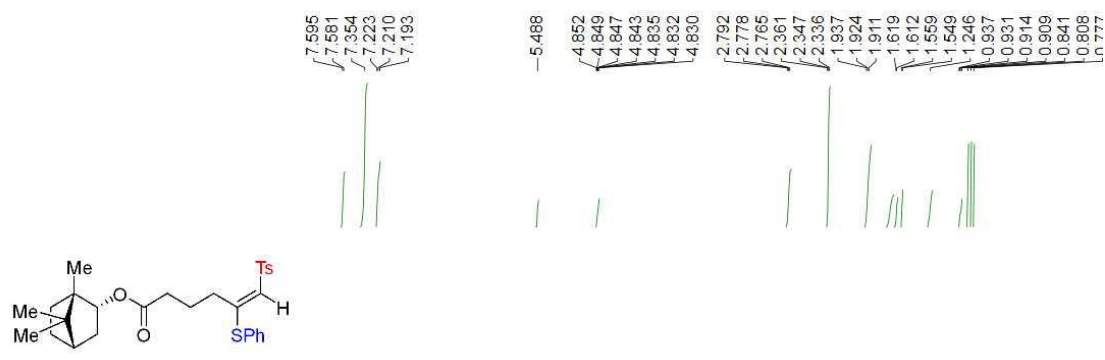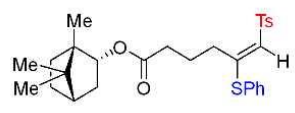

60

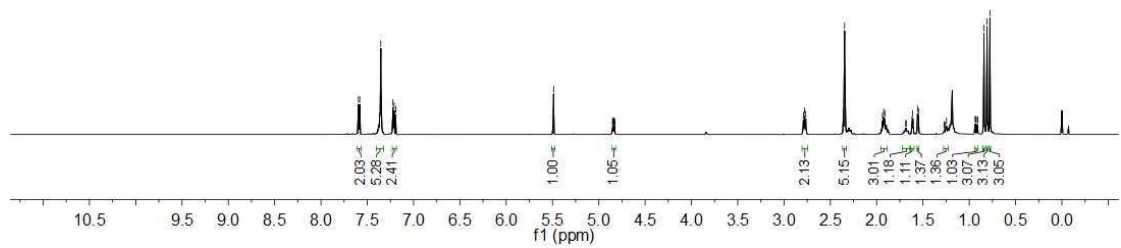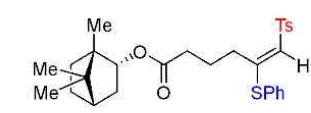

60

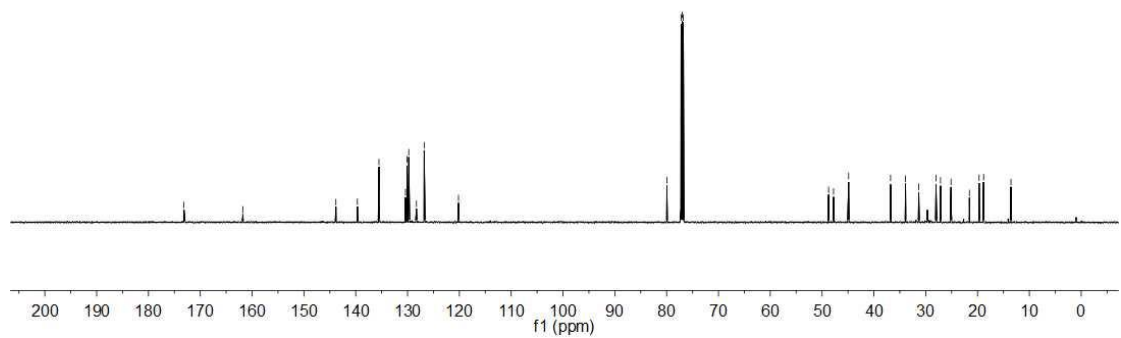

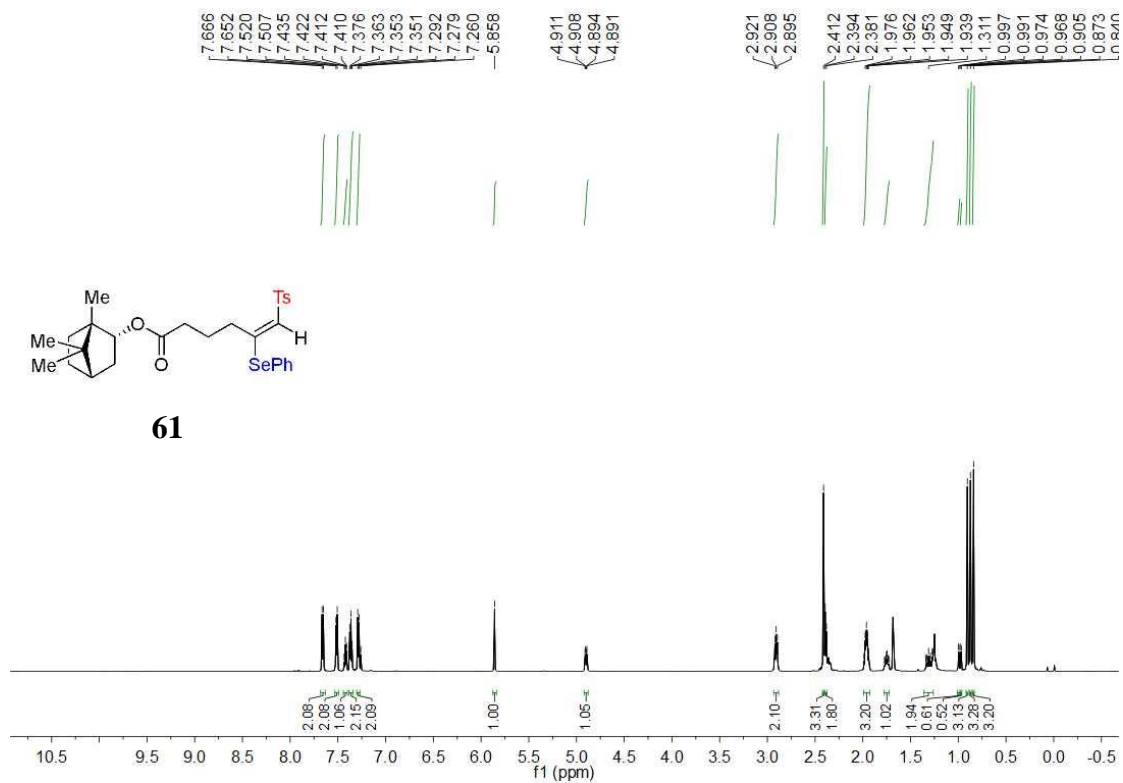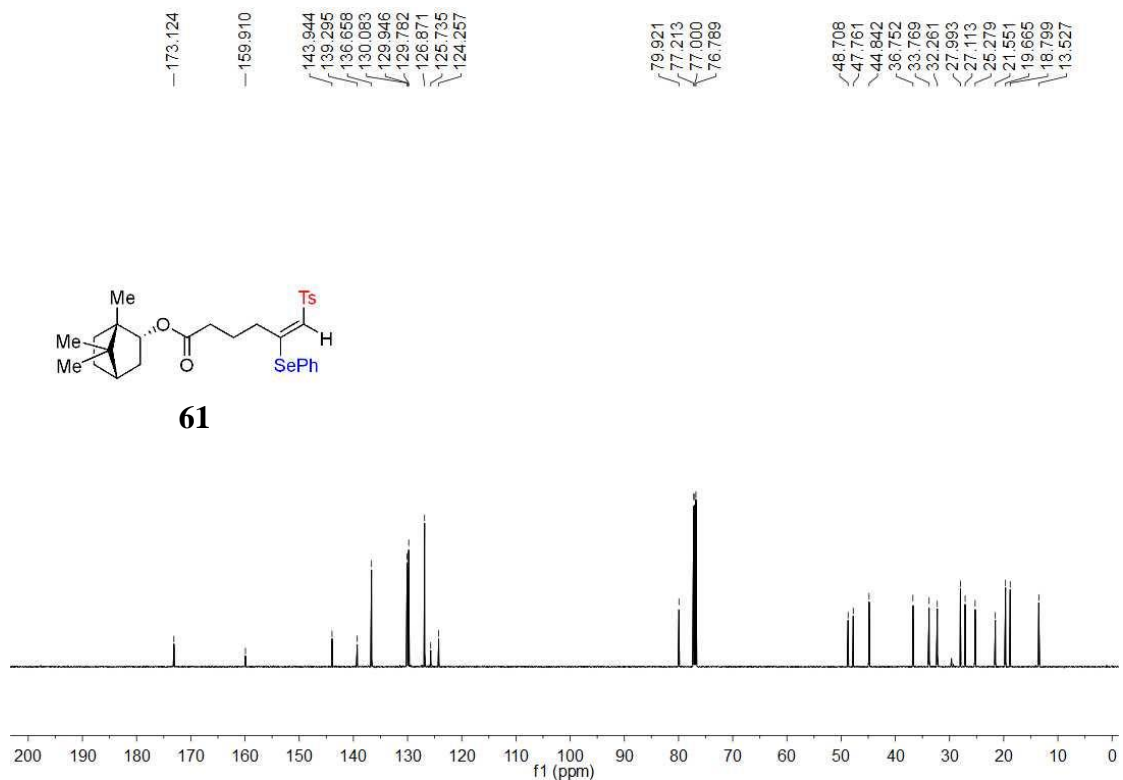

7.642  
7.637  
7.629  
7.623  
7.423  
7.412  
7.410  
7.402  
7.387  
7.376  
7.354  
7.341  
7.324  
7.308  
7.295  
7.282  
7.260  
7.251  
7.247  
7.232  
7.220  
7.136  
7.124  
7.115  
7.103  
6.948  
6.937  
6.787  
6.774  
6.762  
6.597  
6.583  
6.569  
5.534  
5.511  
5.210  
5.206  
5.198  
5.192  
2.970  
2.943  
2.855  
2.843  
2.395  
2.390  
2.360  
2.346  
2.198  
2.189  
2.173  
2.165  
2.162  
2.157  
2.035  
2.023  
2.010  
1.974  
1.961

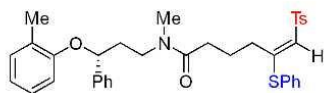

62

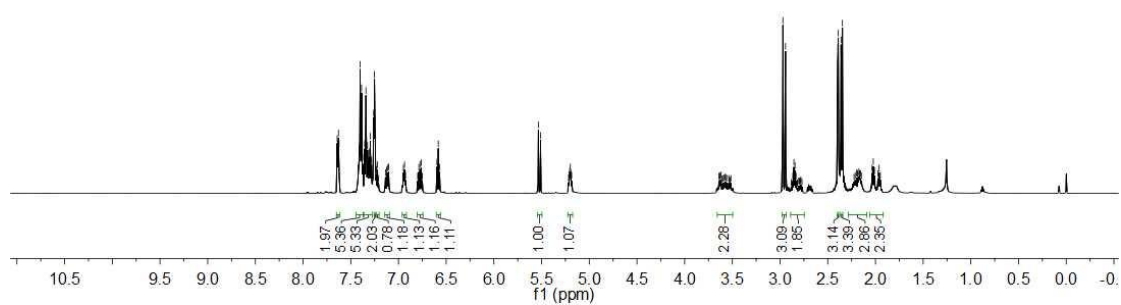

171.964  
171.906  
155.726  
155.373  
143.745  
143.711  
141.622  
141.009  
139.661  
139.624  
135.460  
130.716  
130.555  
130.302  
130.274  
130.012  
129.995  
129.710  
129.699  
128.752  
128.521  
128.343  
127.741  
127.452  
126.844  
126.706  
126.686  
126.673  
126.637  
126.540  
126.565  
125.541  
120.525  
120.217  
119.810  
119.703  
112.637  
112.495  
77.507  
77.212  
77.000  
76.789  
76.463  
46.449  
45.362  
37.548  
36.440  
35.788  
33.383  
32.755  
32.120  
31.414  
31.394  
25.425  
25.062  
21.497  
16.555  
16.497

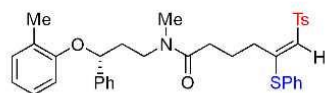

62

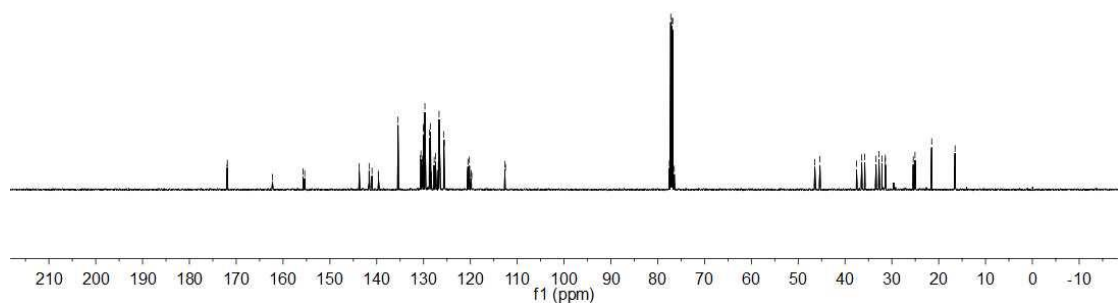

7.642  
7.635  
7.628  
7.622  
7.501  
7.487  
7.472  
7.401  
7.394  
7.390  
7.383  
7.354  
7.341  
7.334  
7.319  
7.304  
7.291  
7.278  
7.260  
7.248  
7.228  
7.216  
7.130  
7.117  
7.110  
7.098  
6.937  
6.924  
6.781  
6.769  
6.757  
6.591  
6.576  
6.561  
5.830  
5.801  
5.199  
5.191  
5.185  
2.956  
2.935  
2.925  
2.918  
2.912  
2.899  
2.892  
2.360  
2.340  
2.204  
2.190  
2.158  
2.152  
2.146  
2.001  
1.988  
1.976  
1.928  
1.763

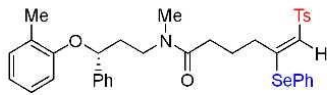

63

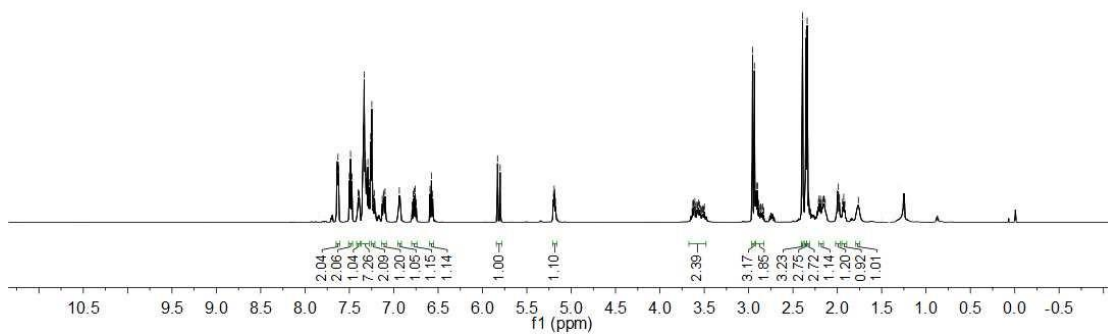

171.960  
171.898  
155.735  
155.380  
143.881  
143.845  
141.629  
141.023  
139.326  
139.286  
136.658  
136.646  
130.728  
130.565  
130.041  
129.875  
129.846  
129.760  
129.748  
128.764  
128.534  
127.754  
127.465  
126.856  
126.819  
126.607  
126.681  
126.657  
126.553  
125.831  
125.831  
125.674  
123.907  
123.776  
120.540  
120.230  
112.648  
112.501  
77.520  
77.211  
77.000  
76.788  
76.460  
46.447  
45.365  
37.546  
36.449  
35.773  
33.390  
32.644  
32.368  
32.349  
31.986  
25.571  
25.220  
21.528  
16.567  
16.509

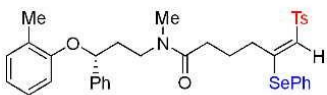

63

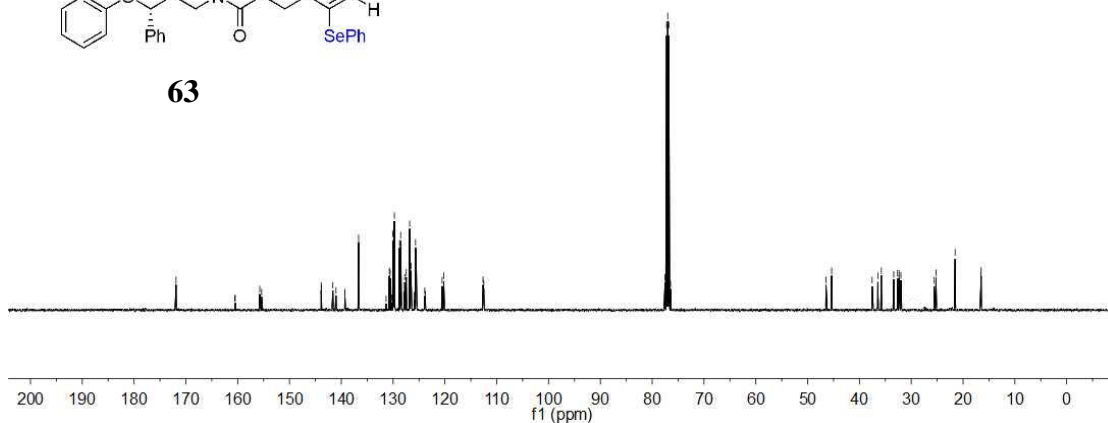

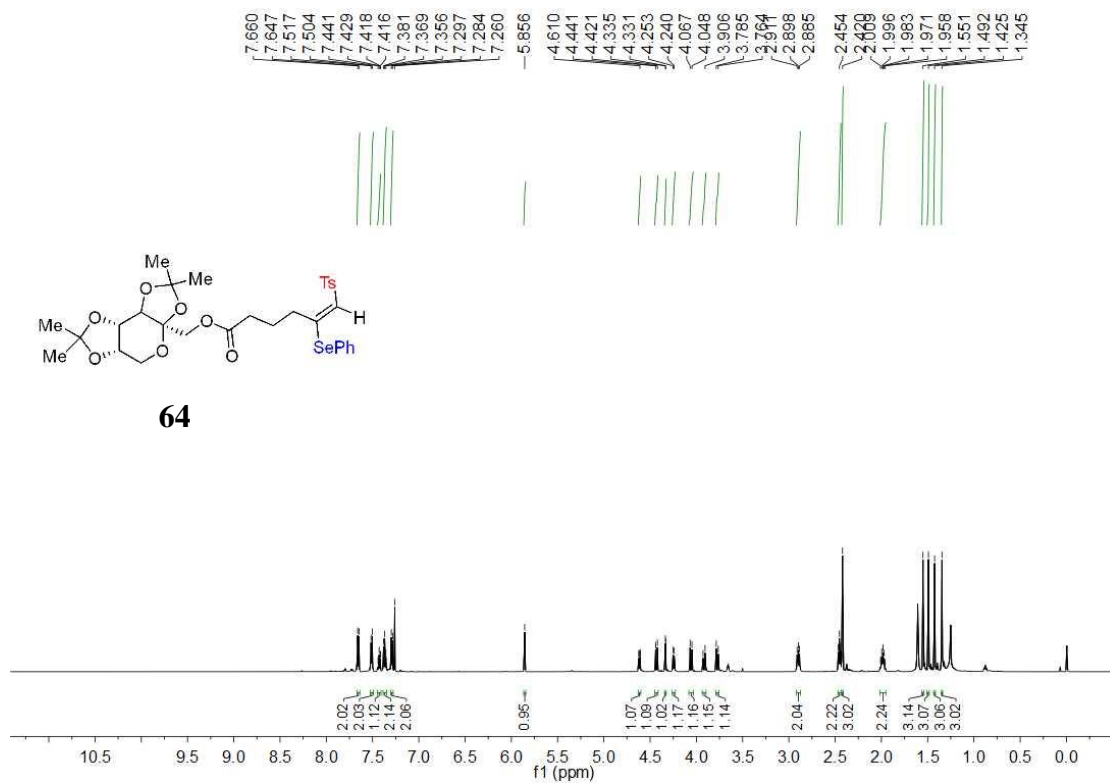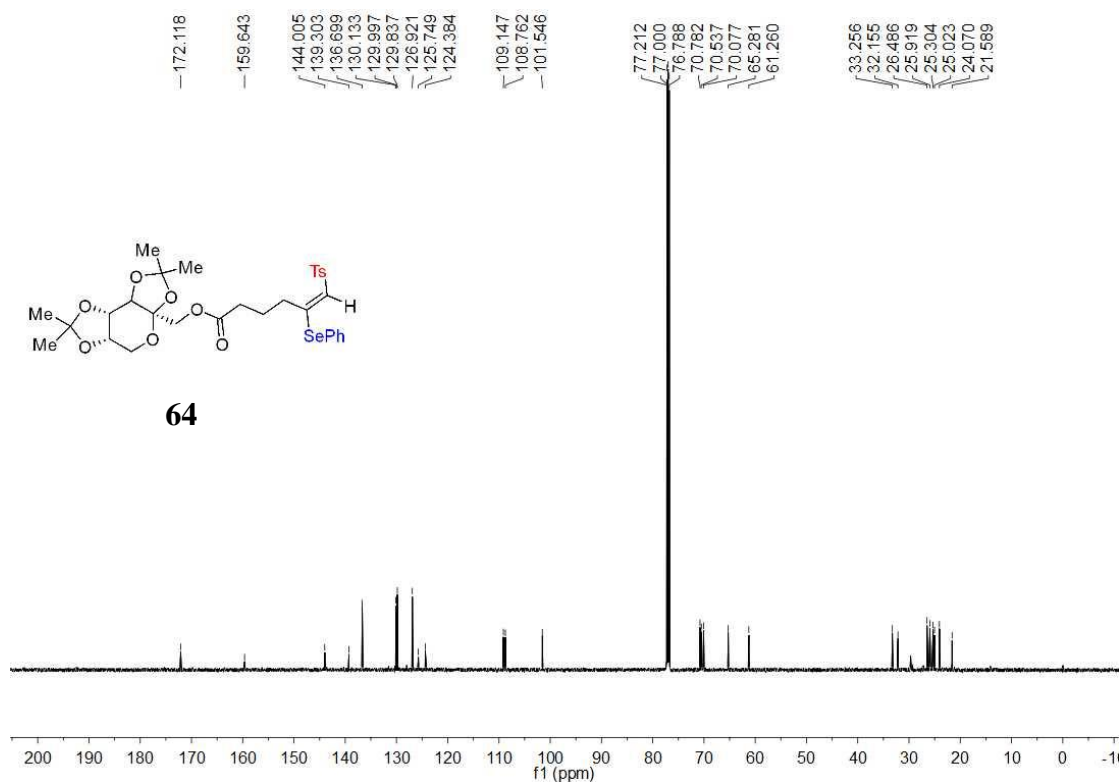

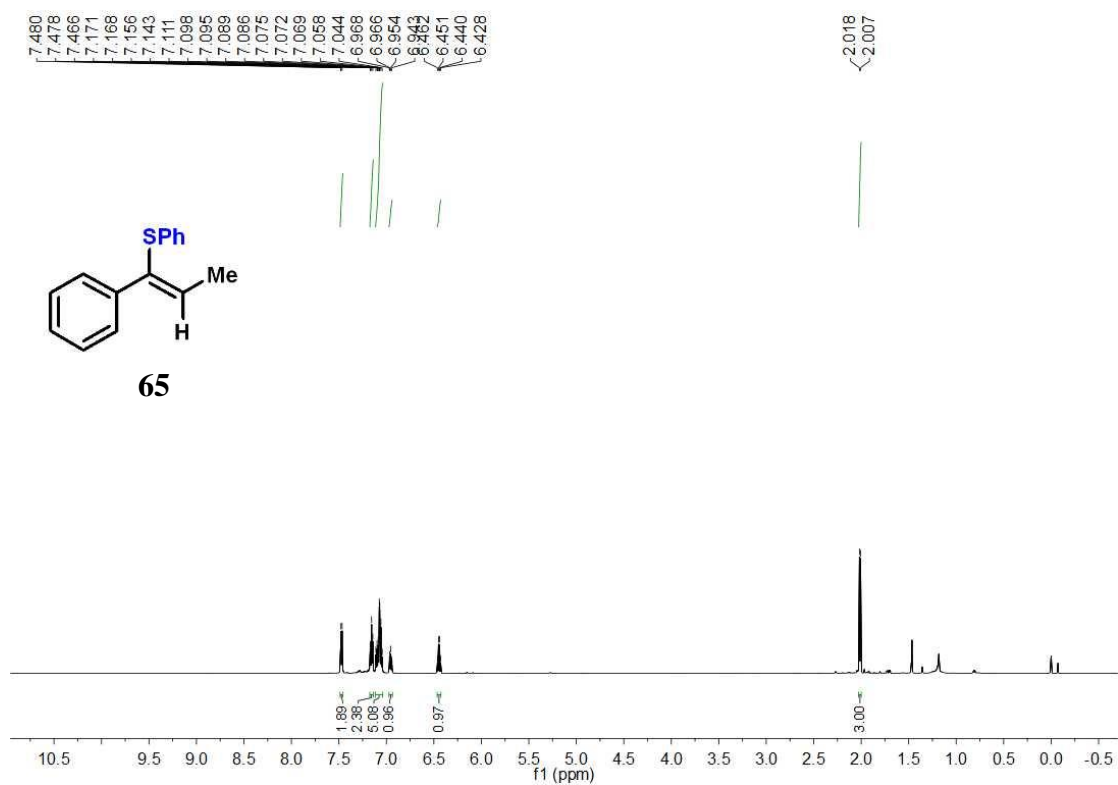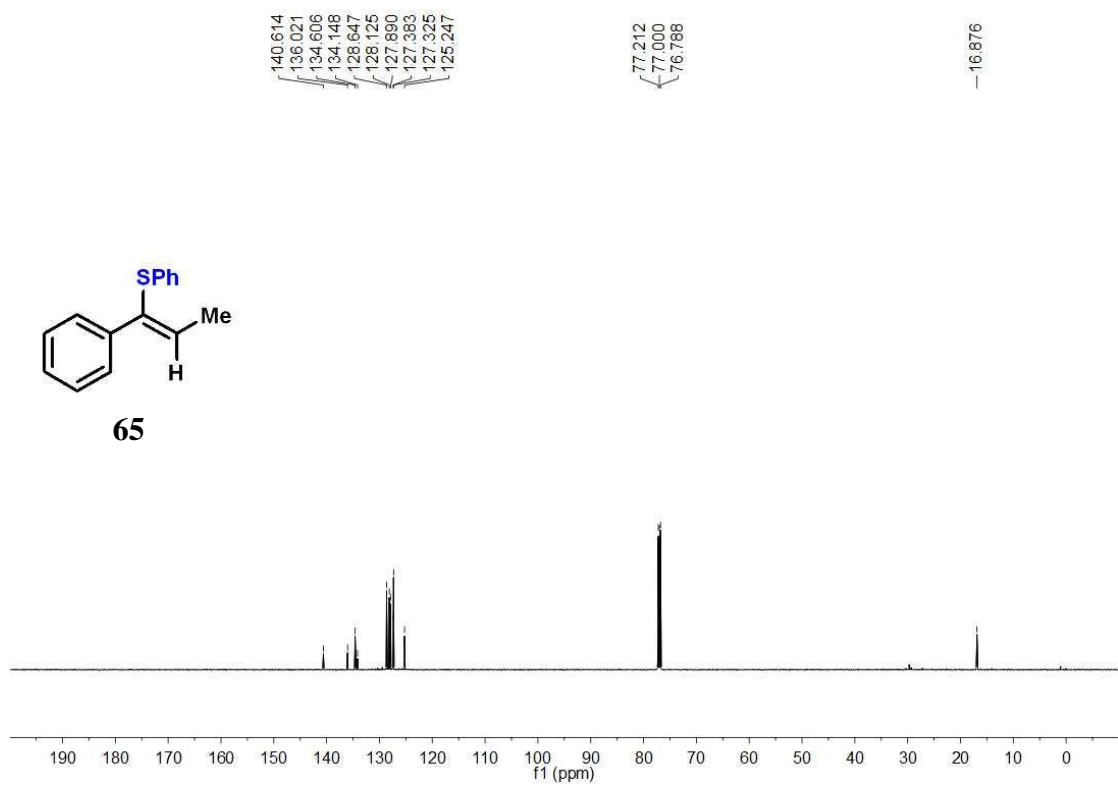

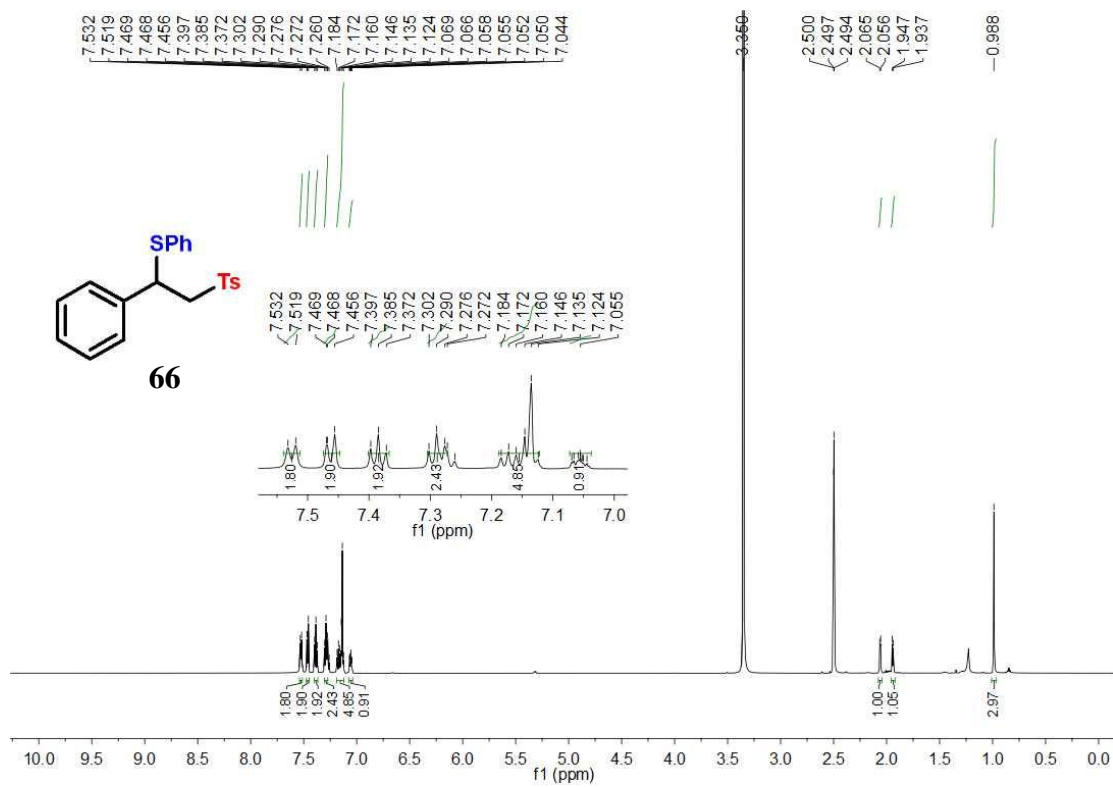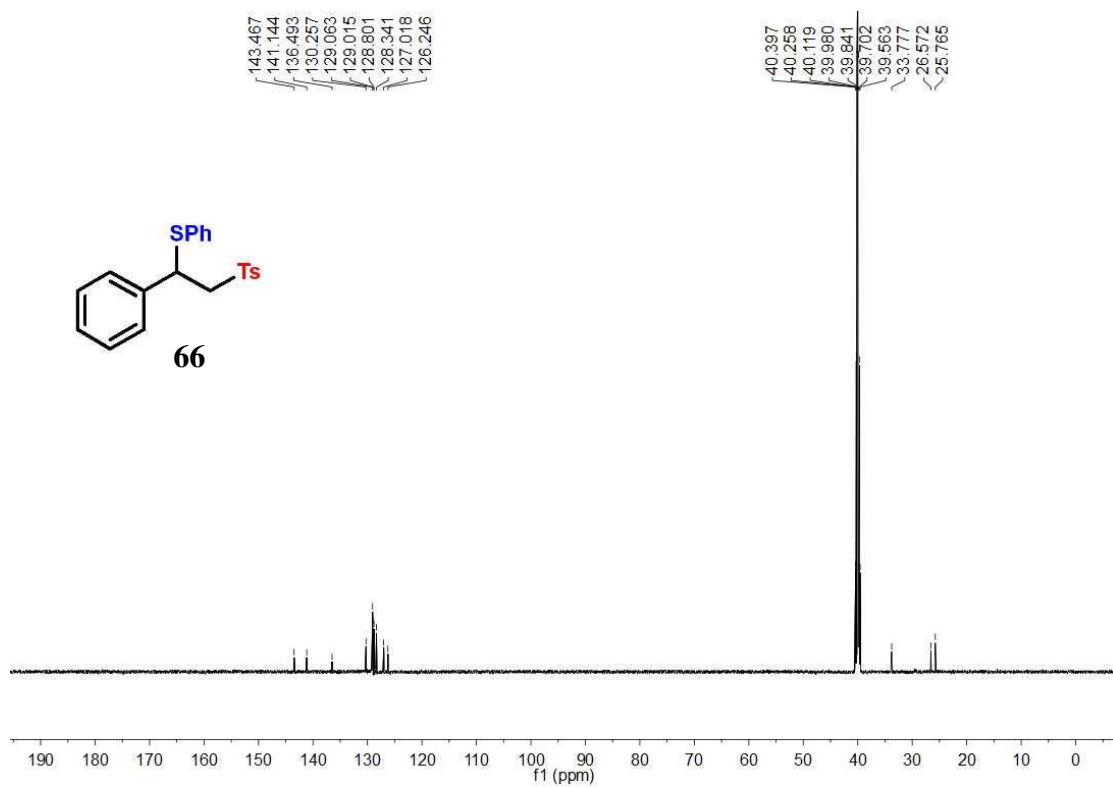

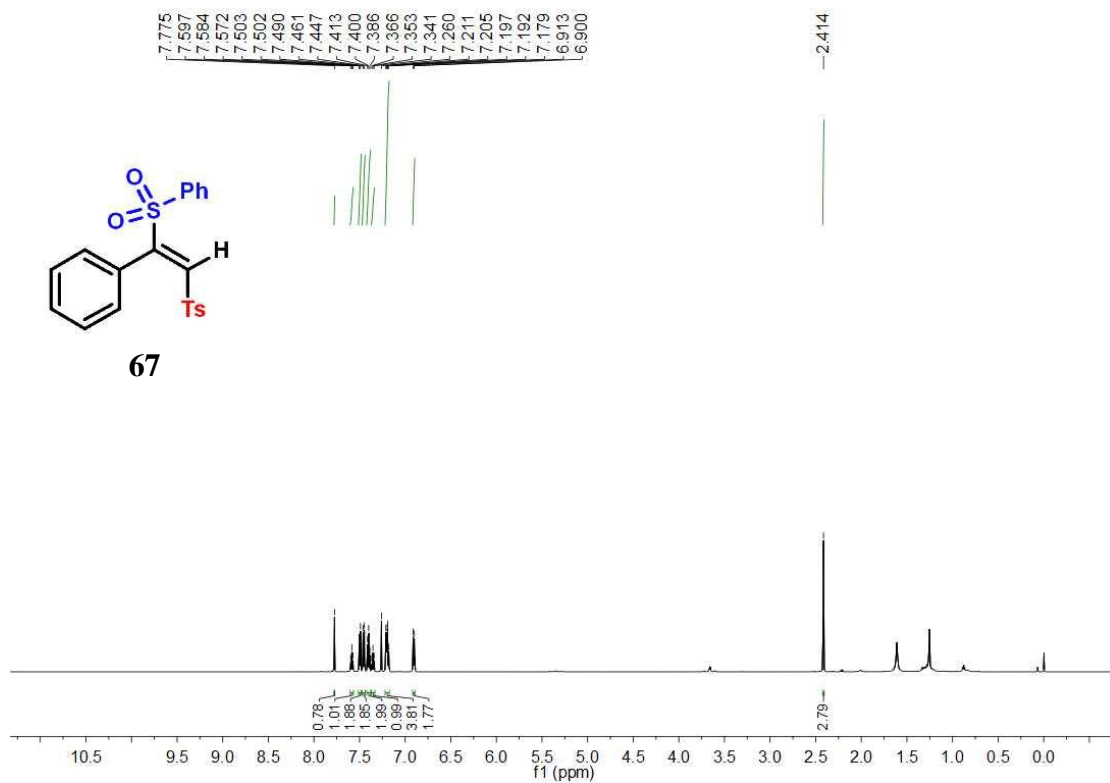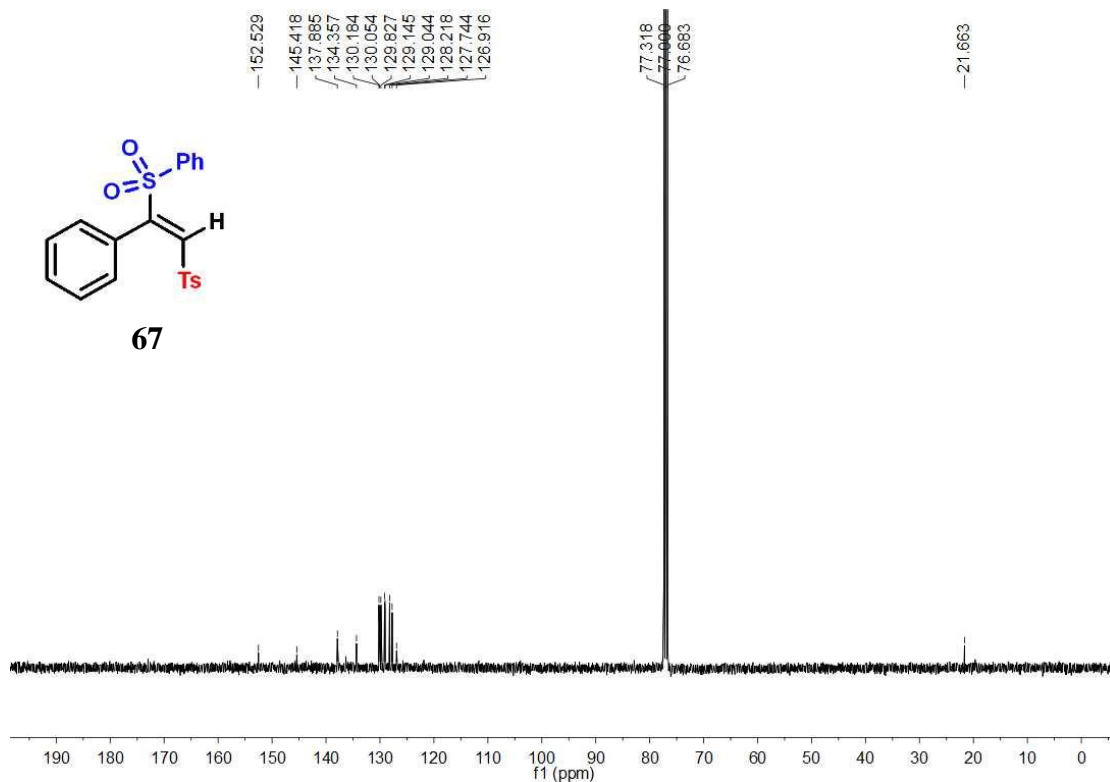



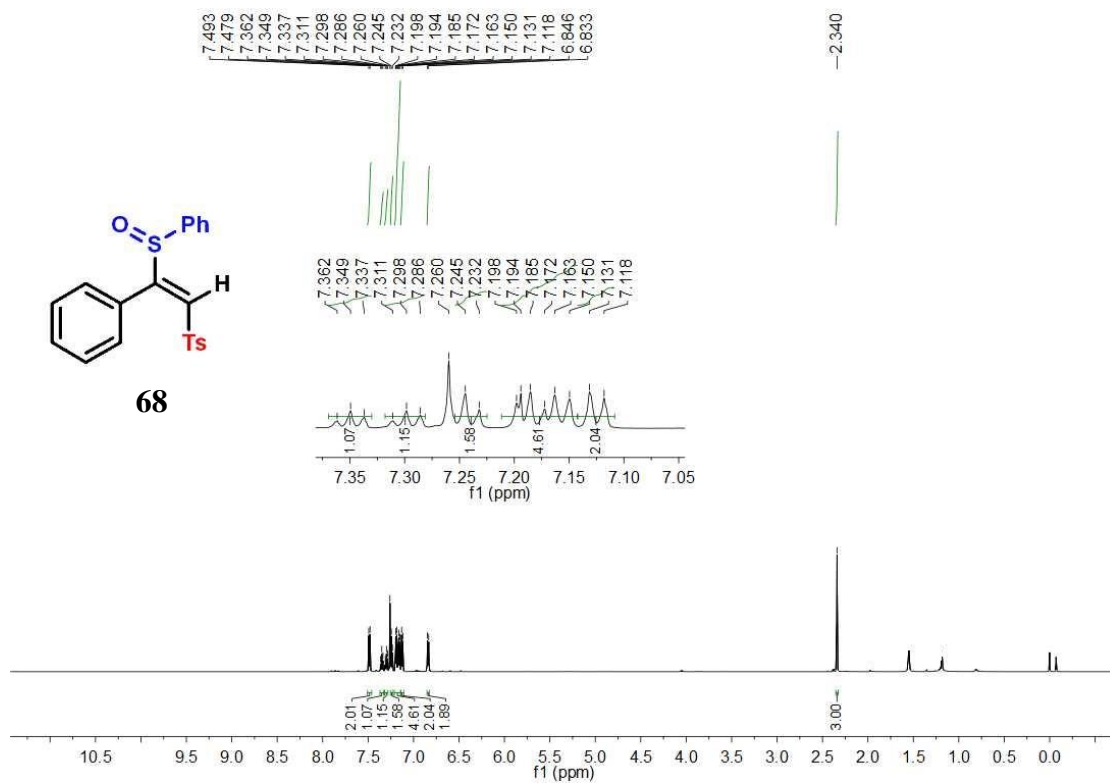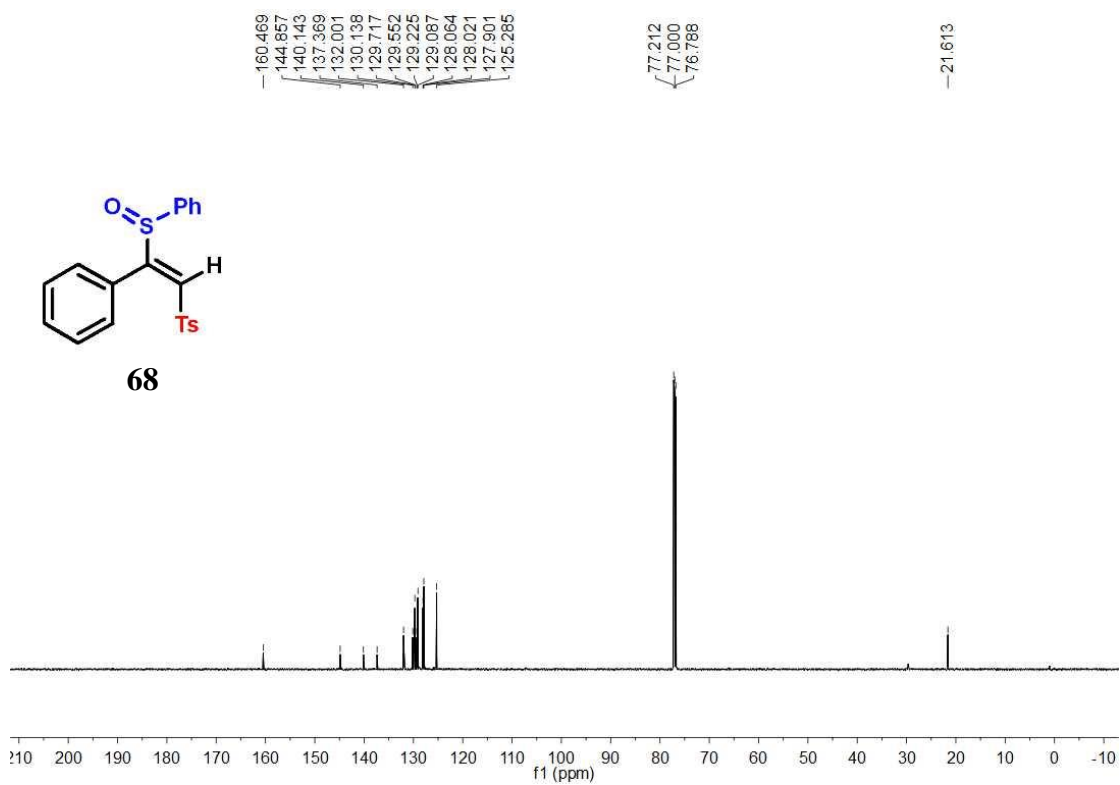

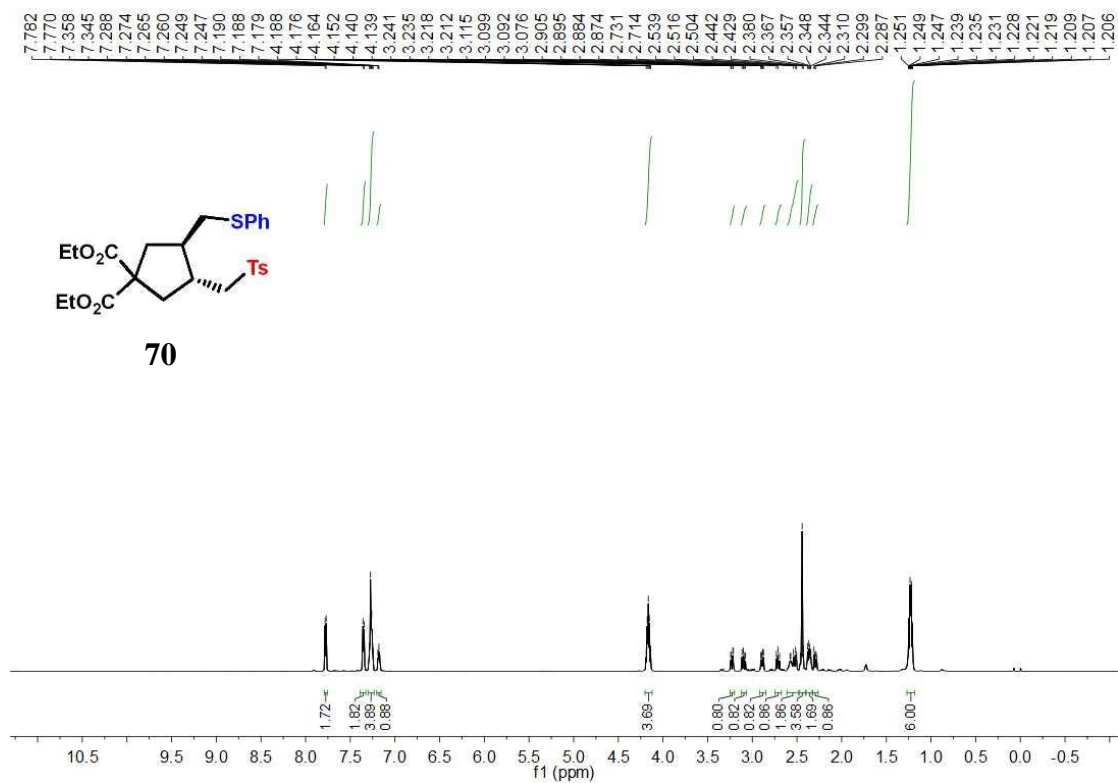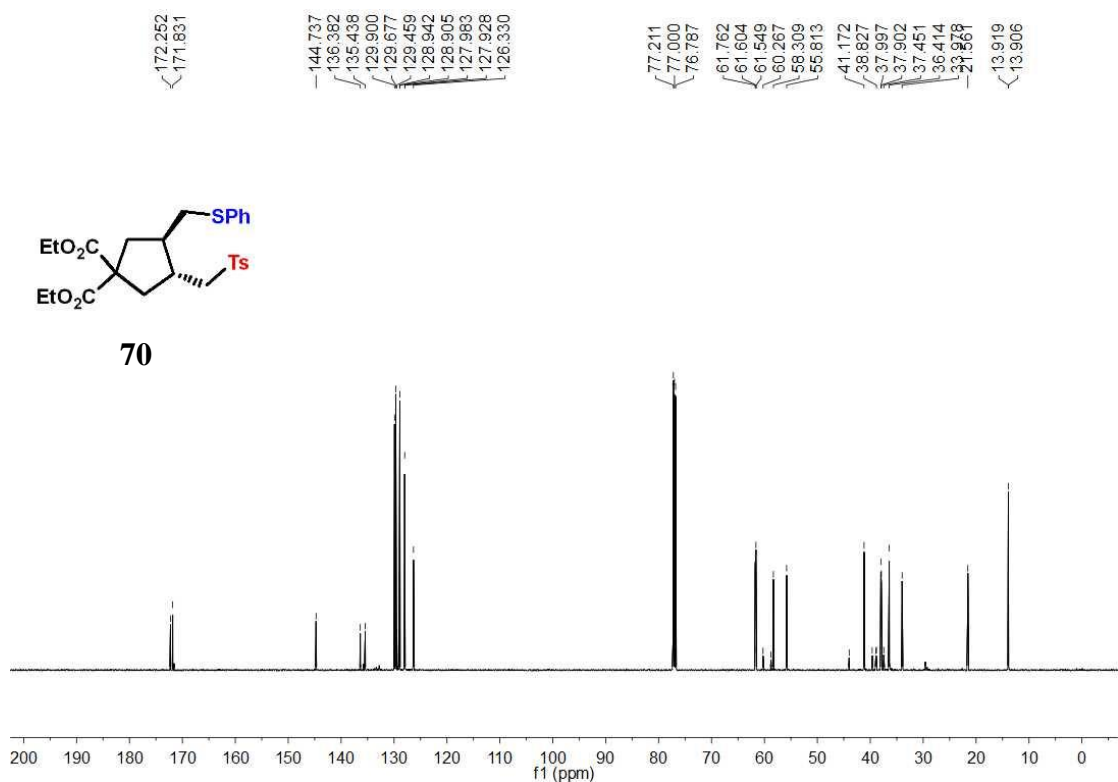

Supplement: d3gc02897f1.pdf [file d3gc02897f1.pdf]
